# Supplementary material
Source: PubMed Central journal article supplement (PMC55322)

# embryo

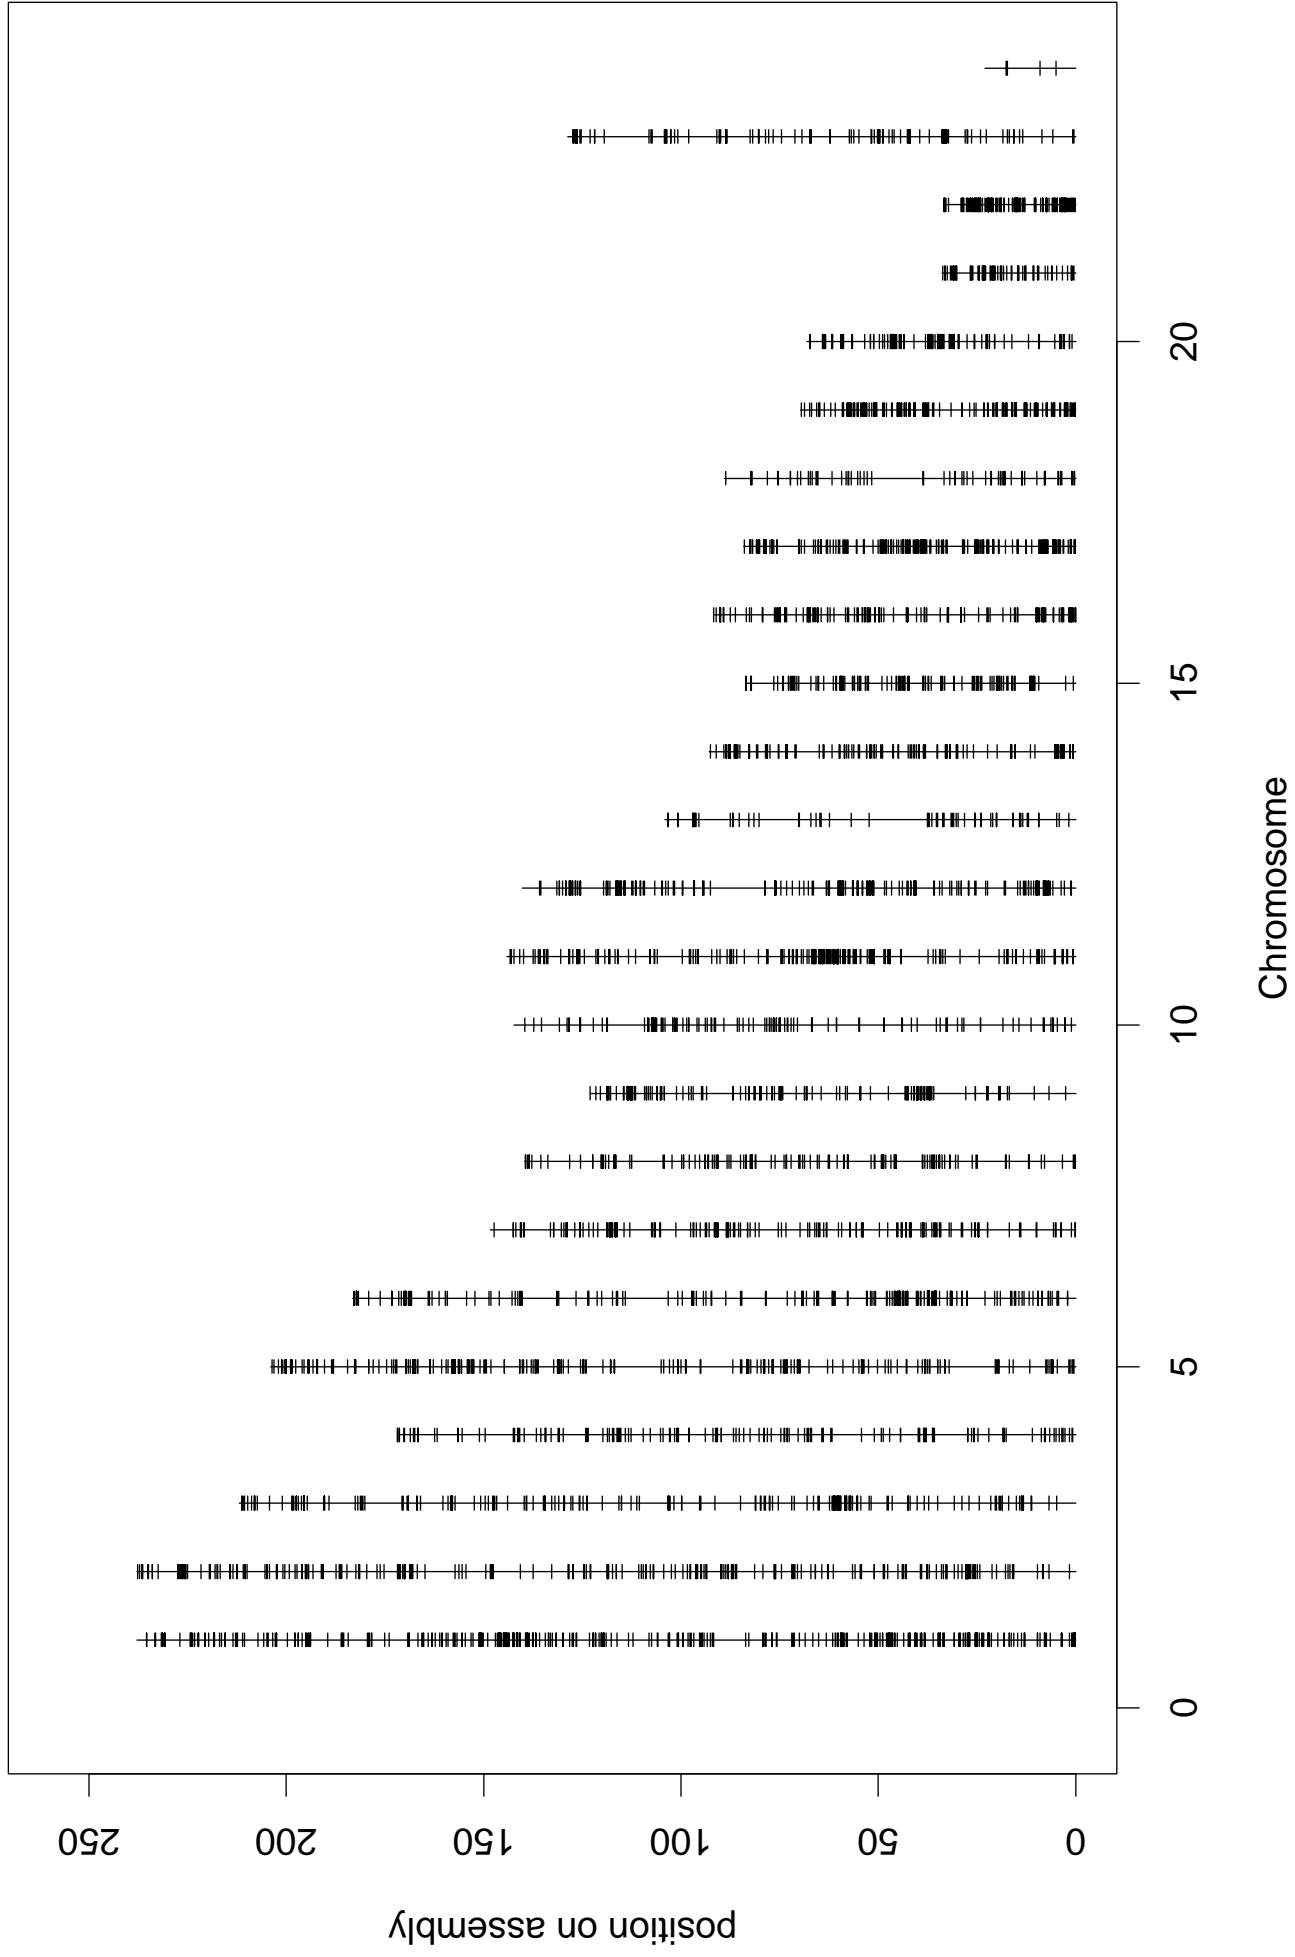

infant

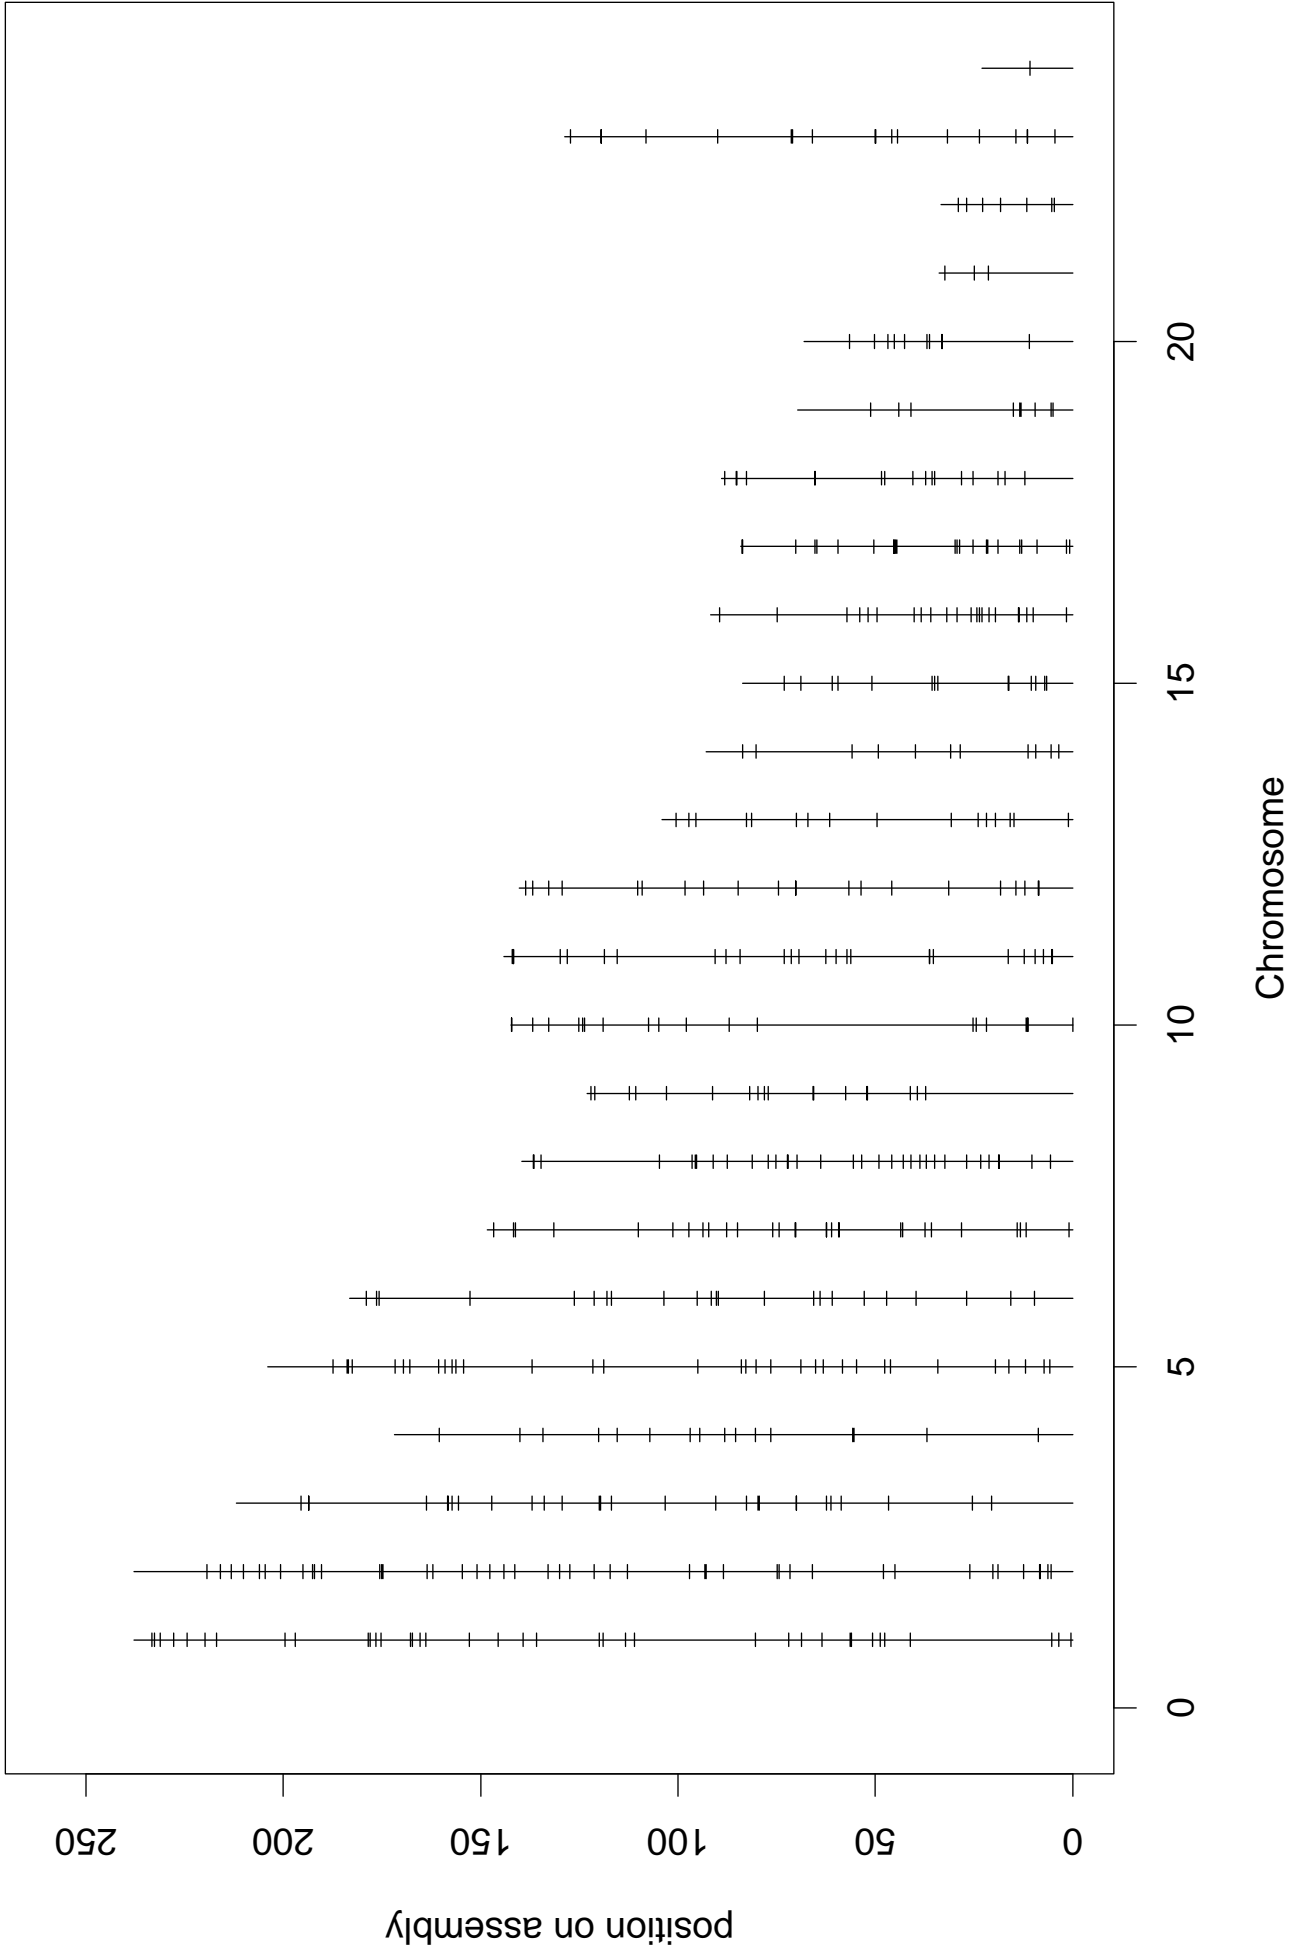

brain

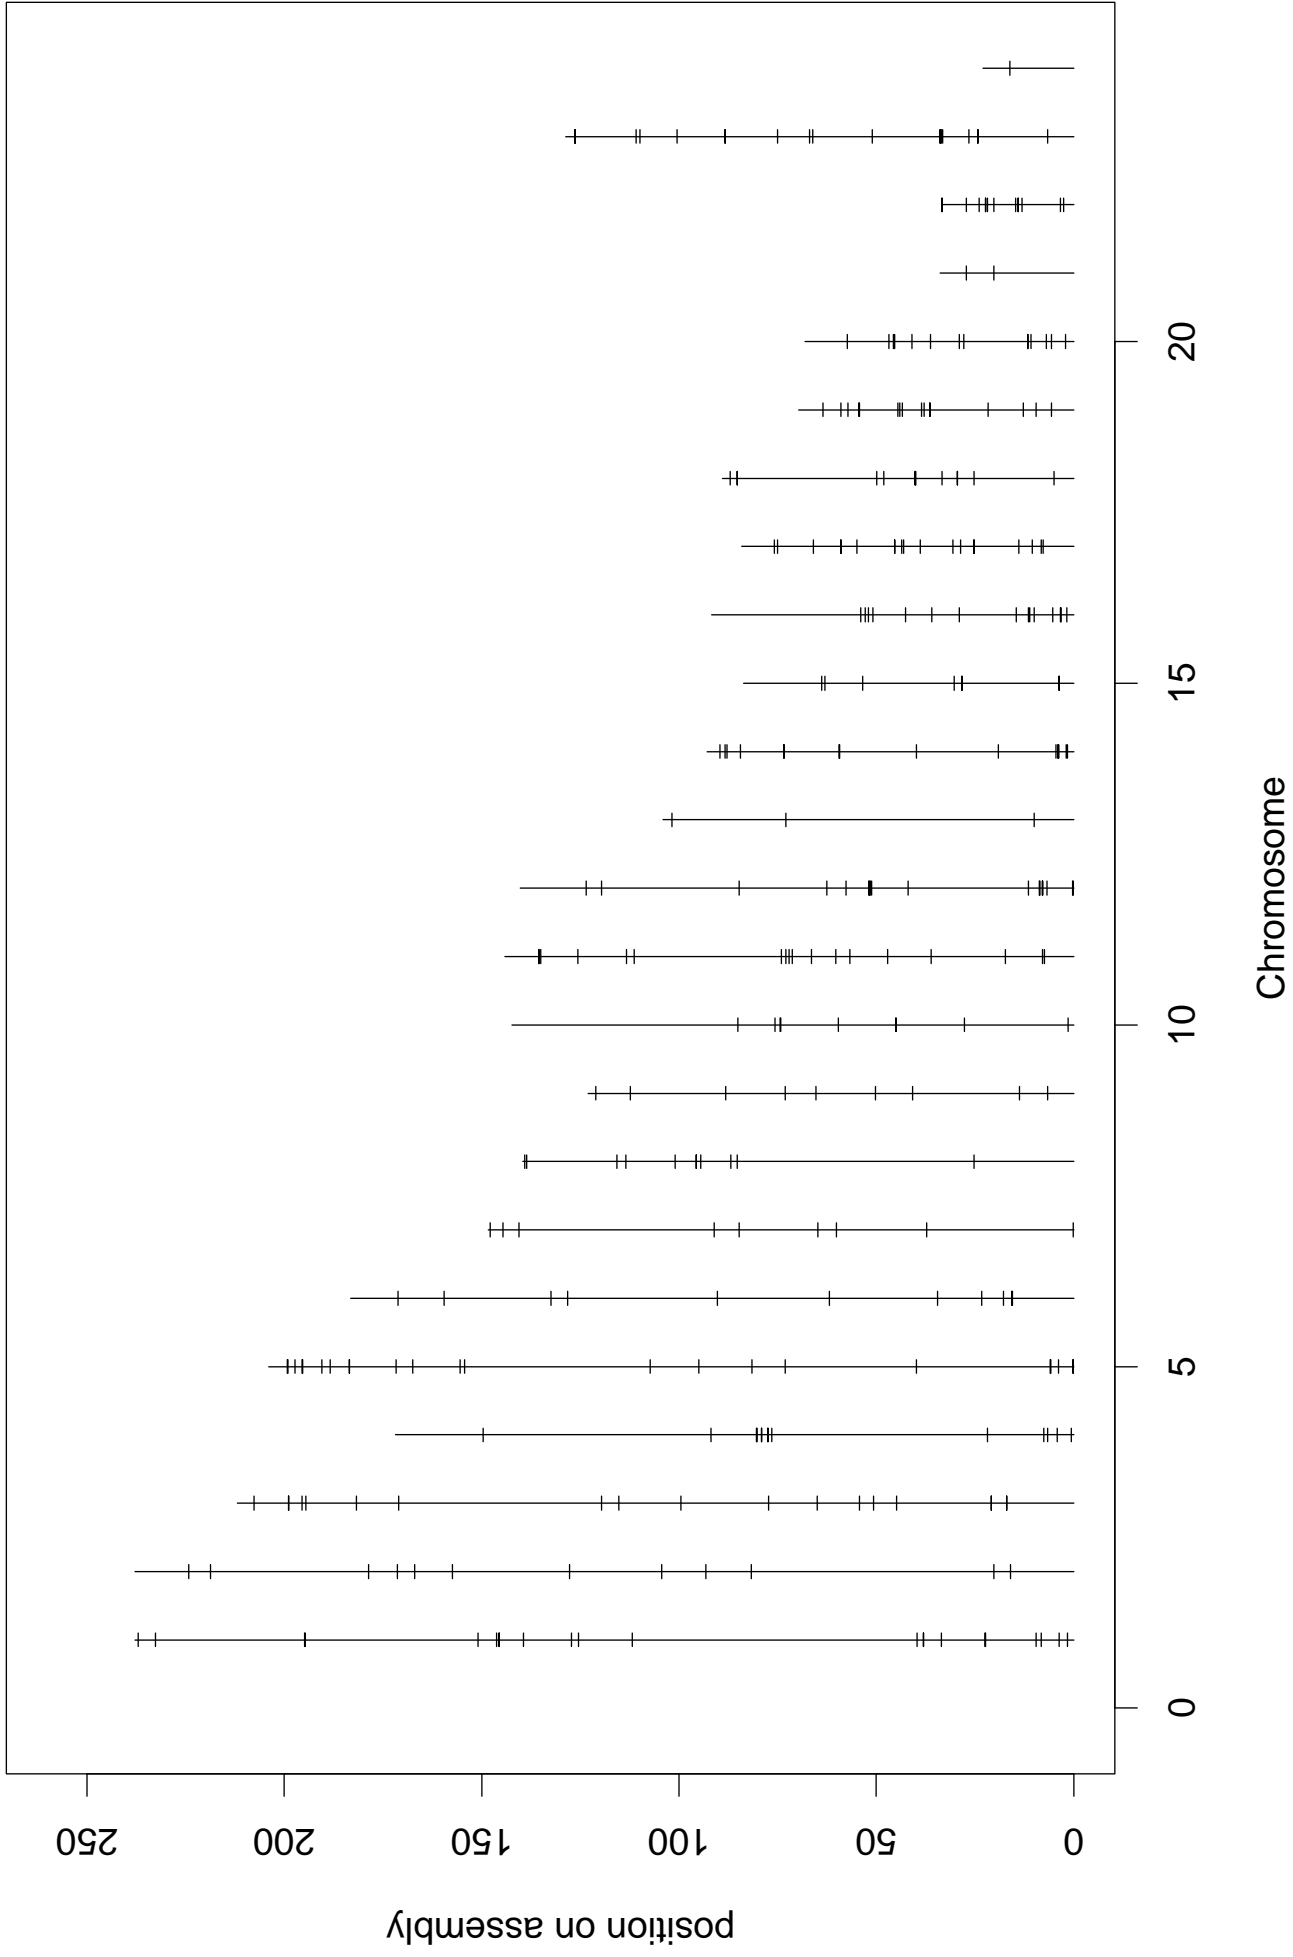

# testis

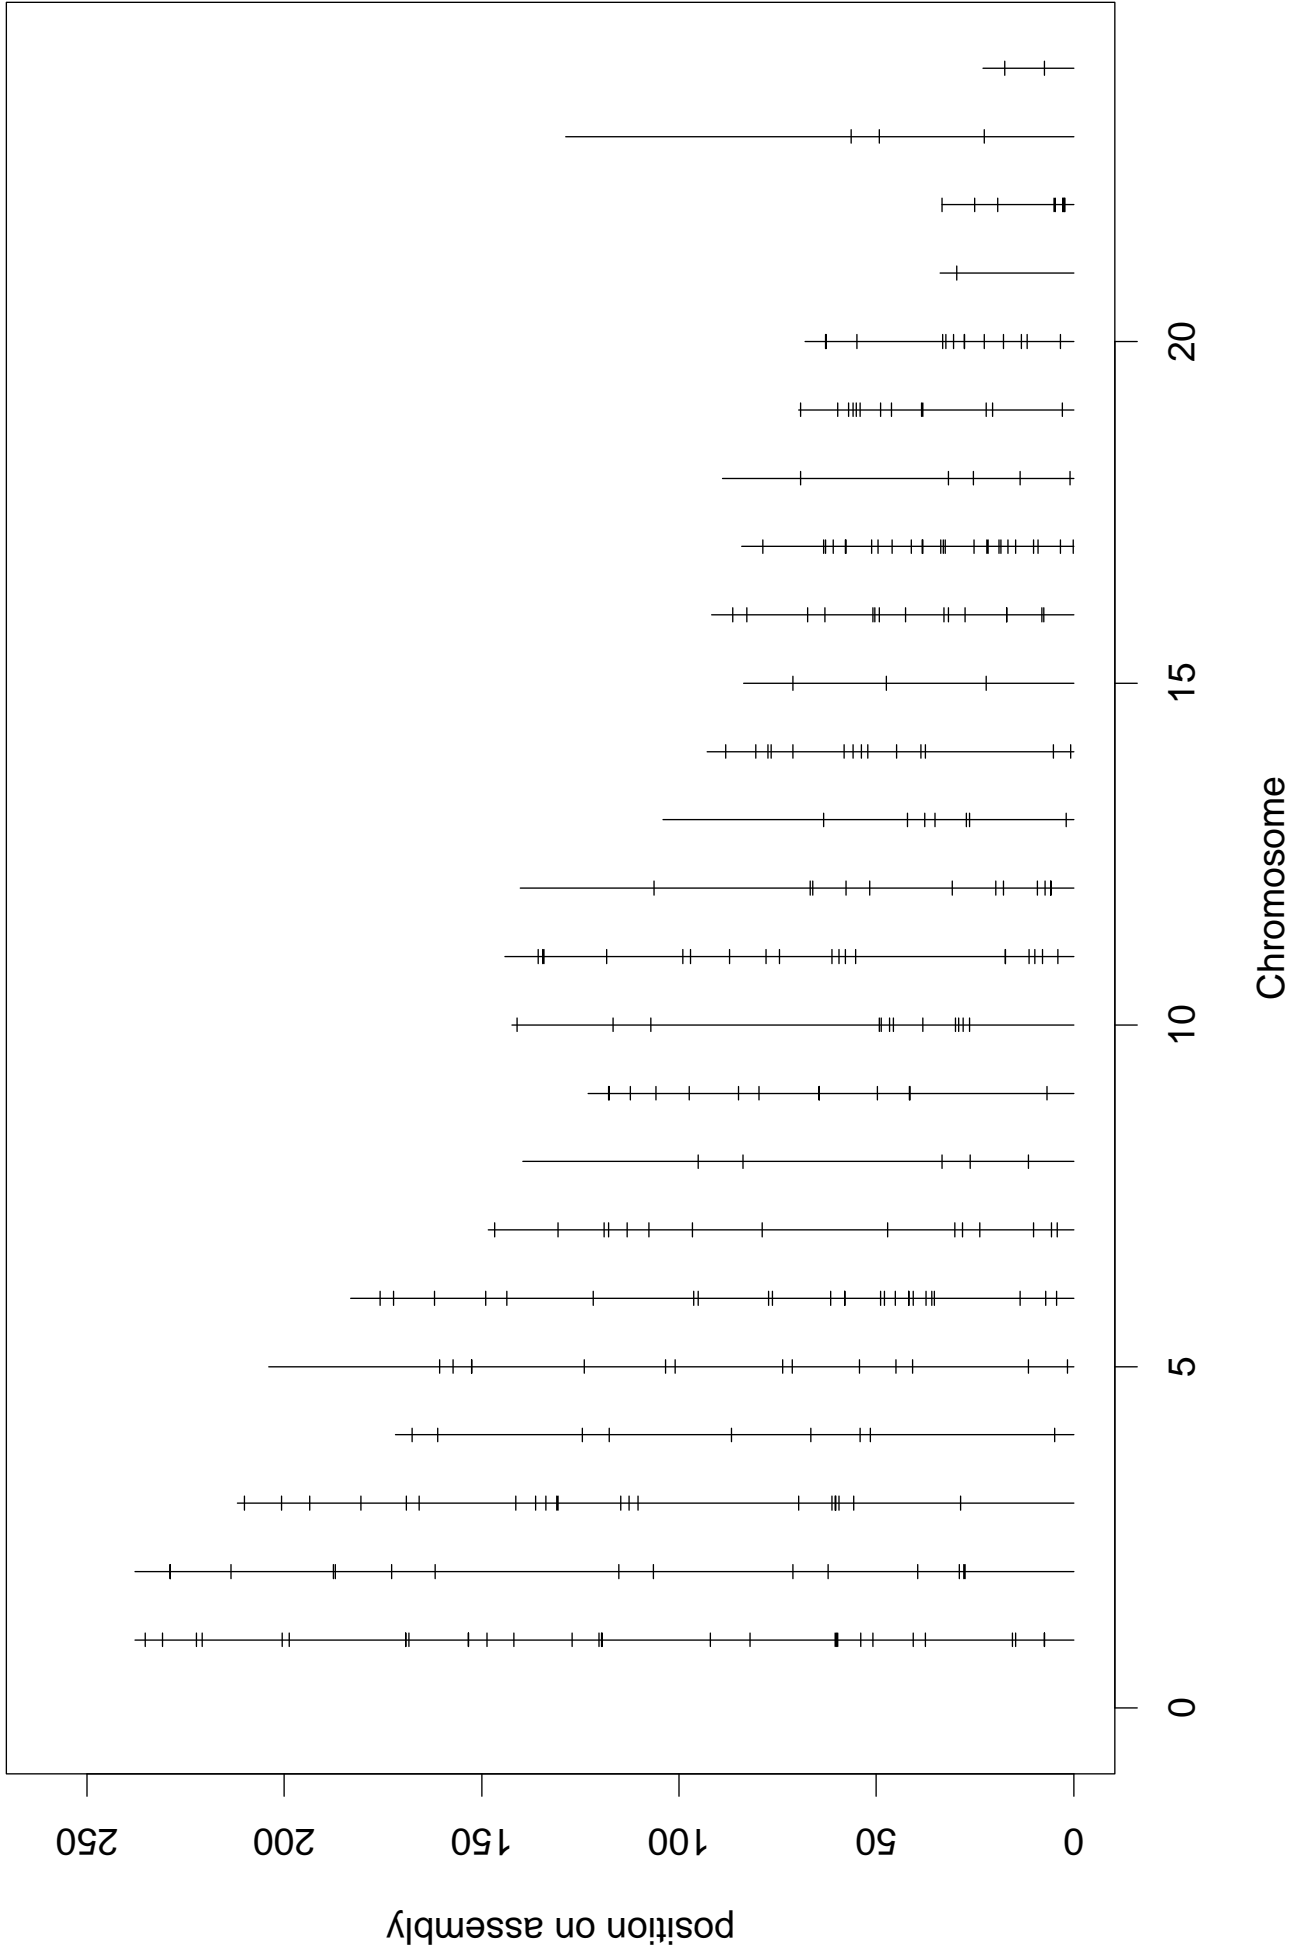

# kidney

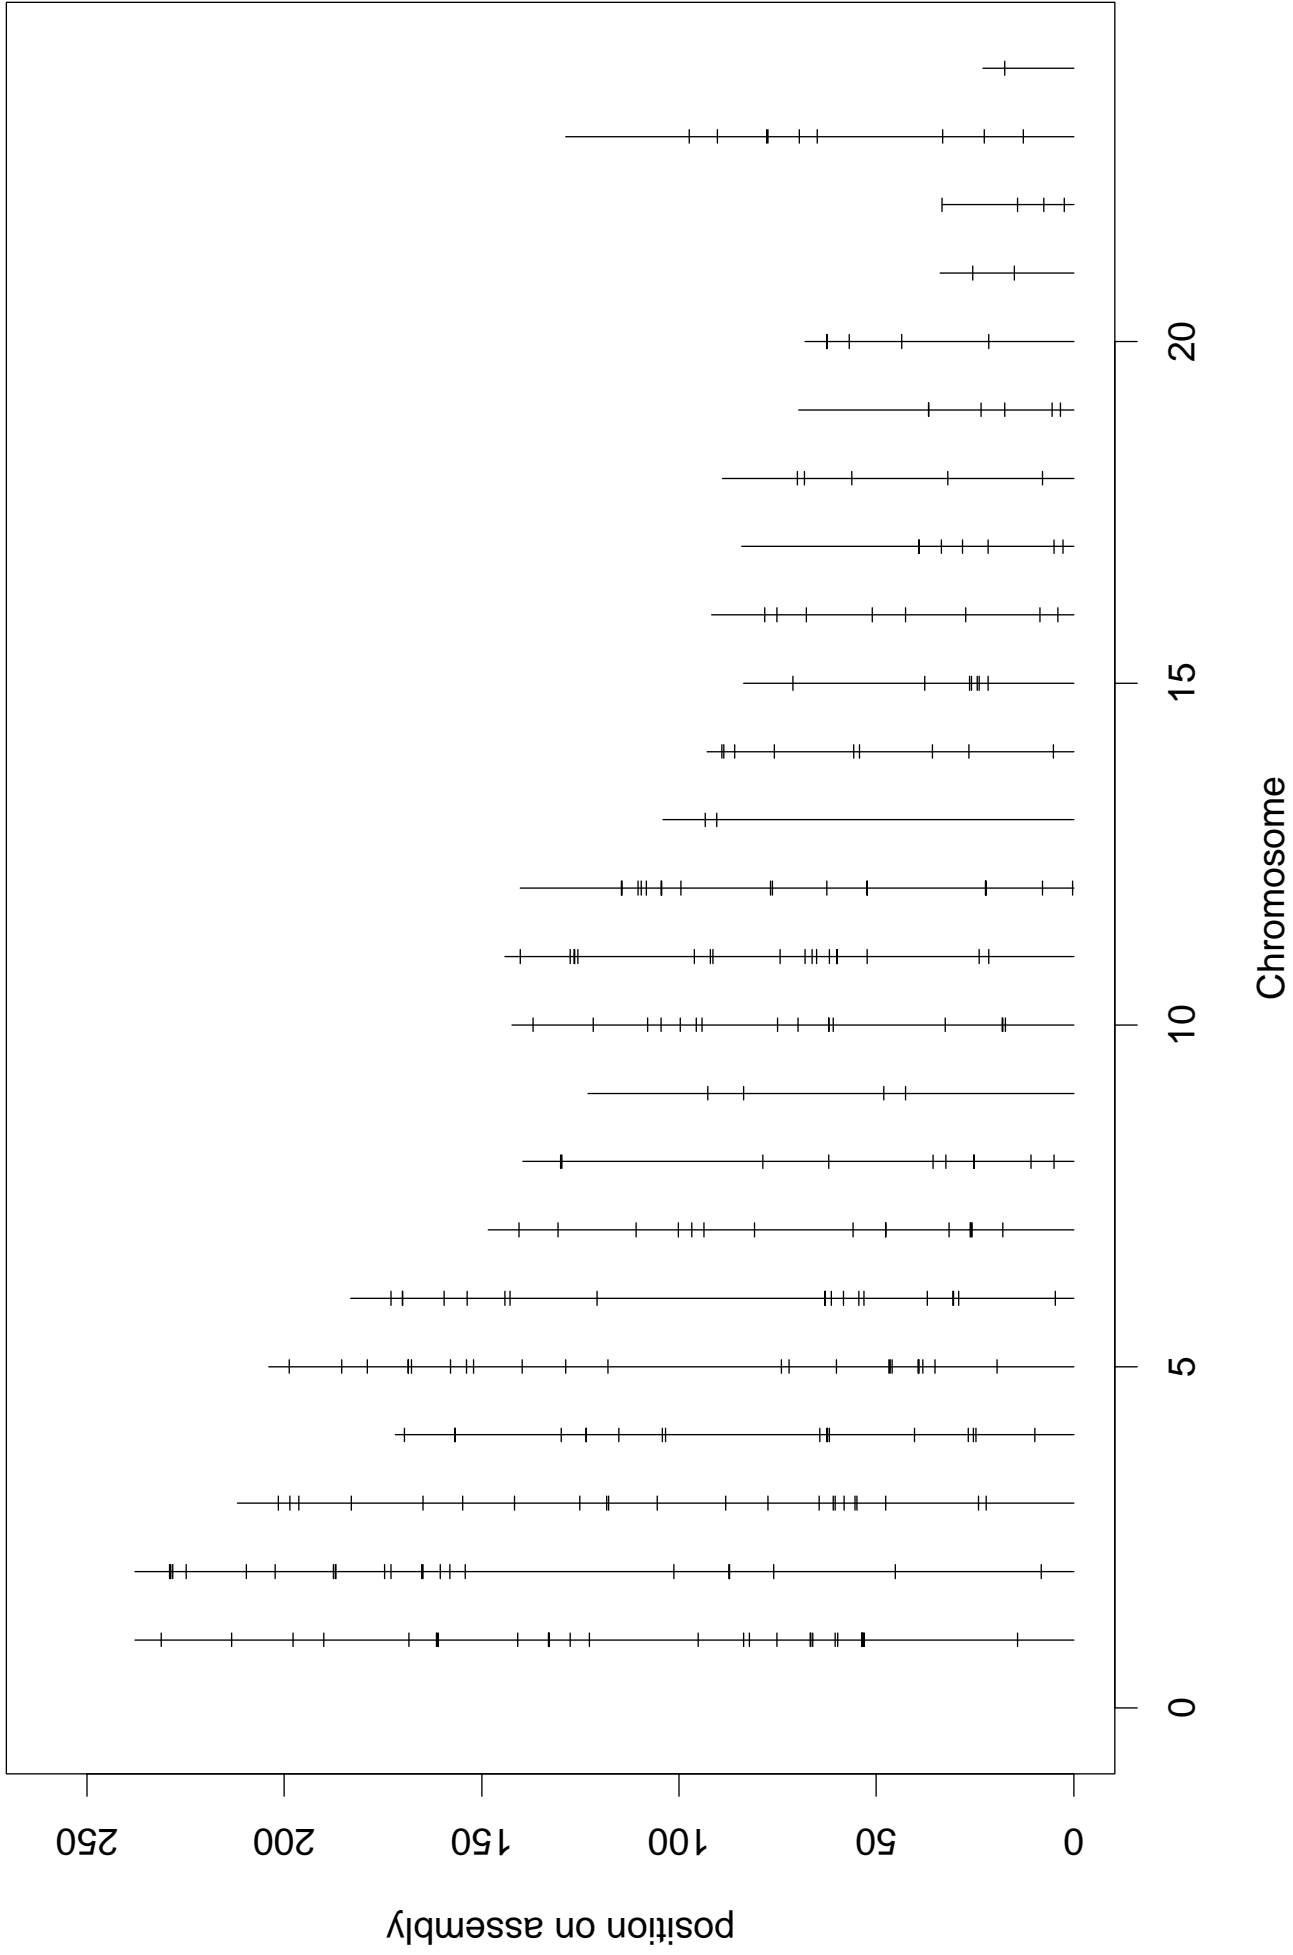

lymph

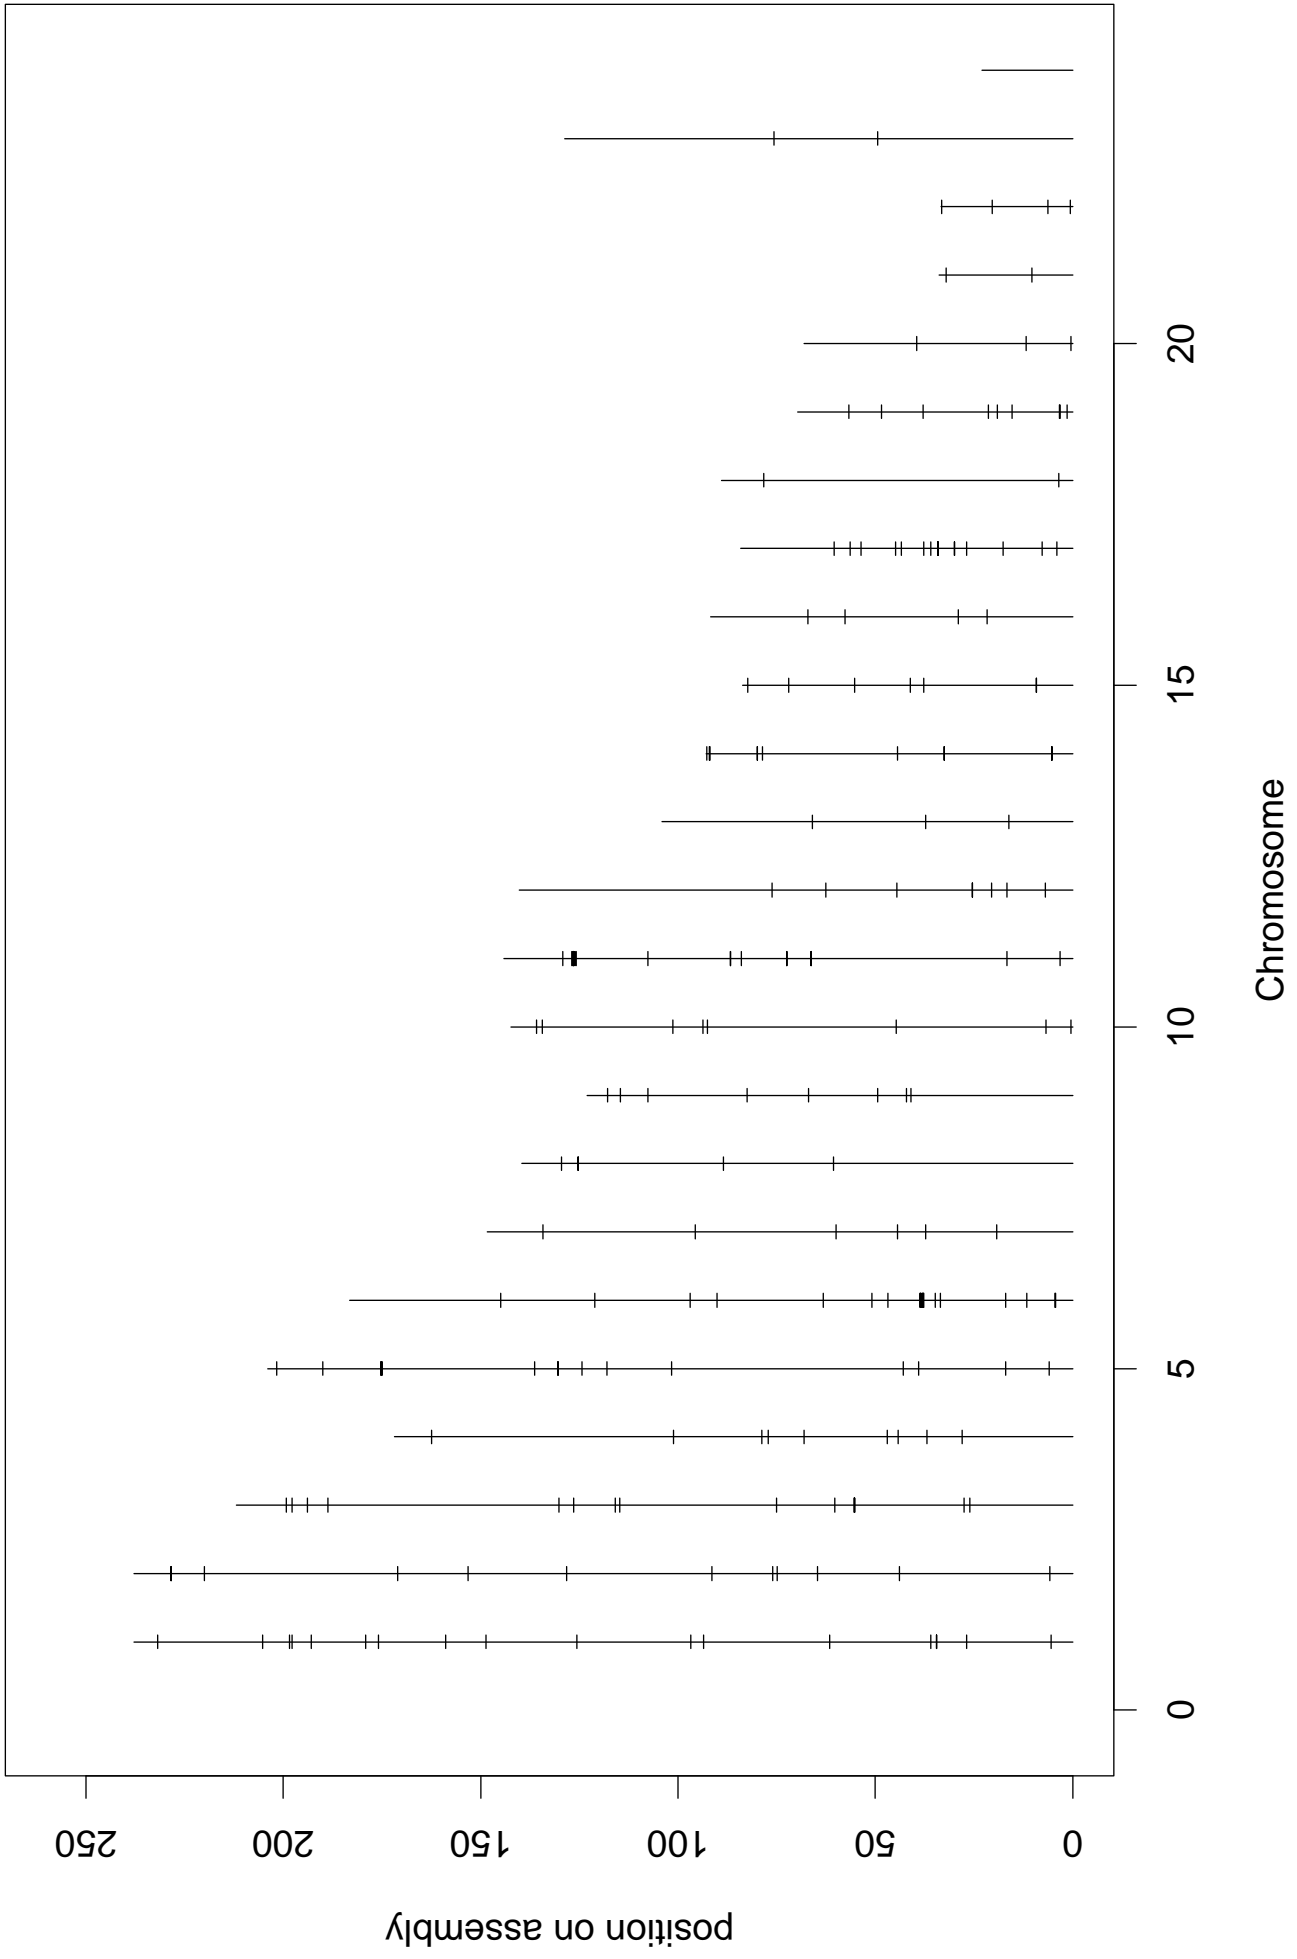

# newborn

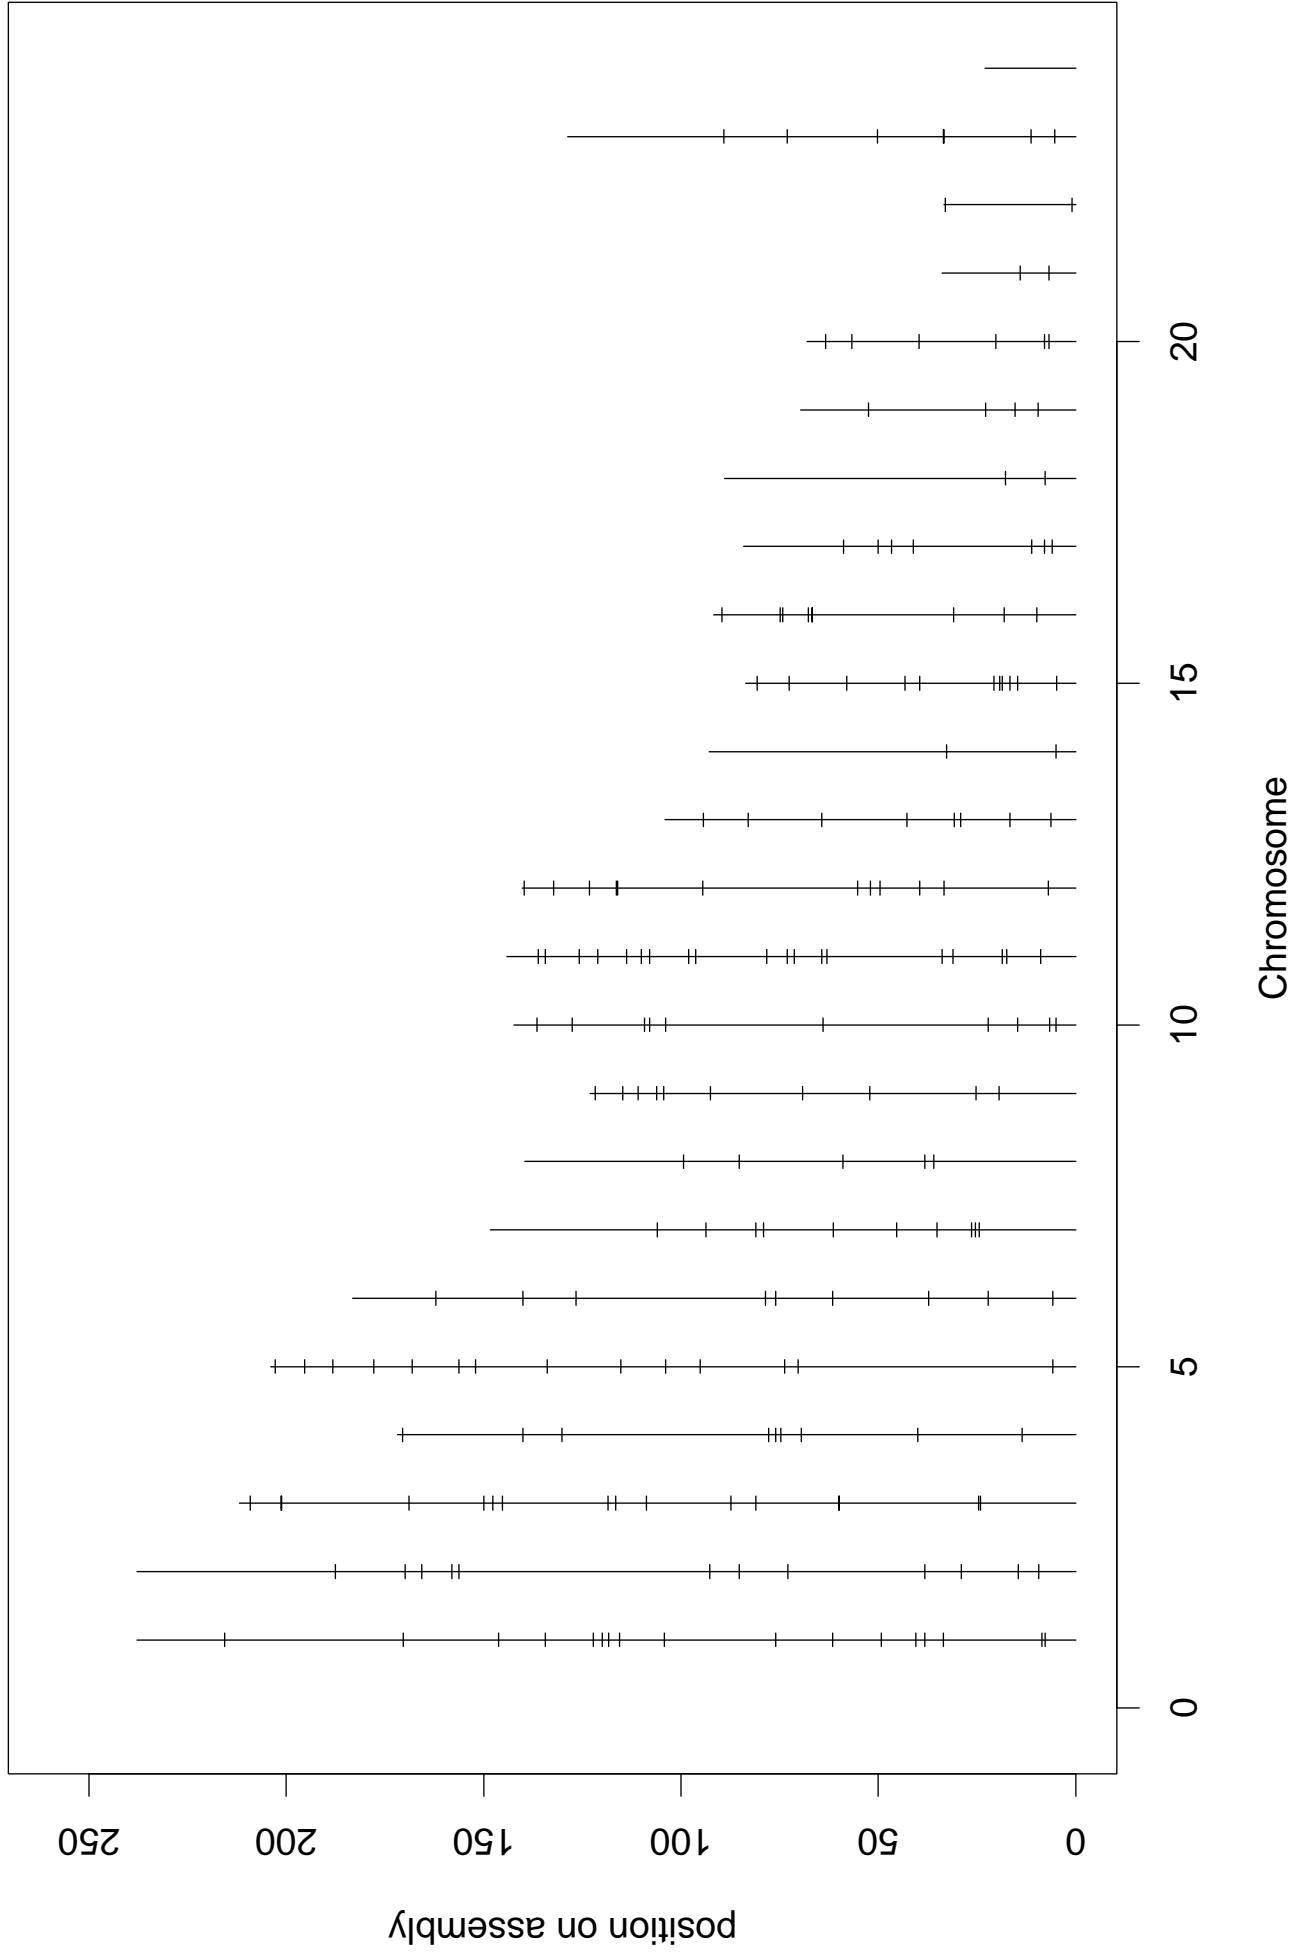

**liver**

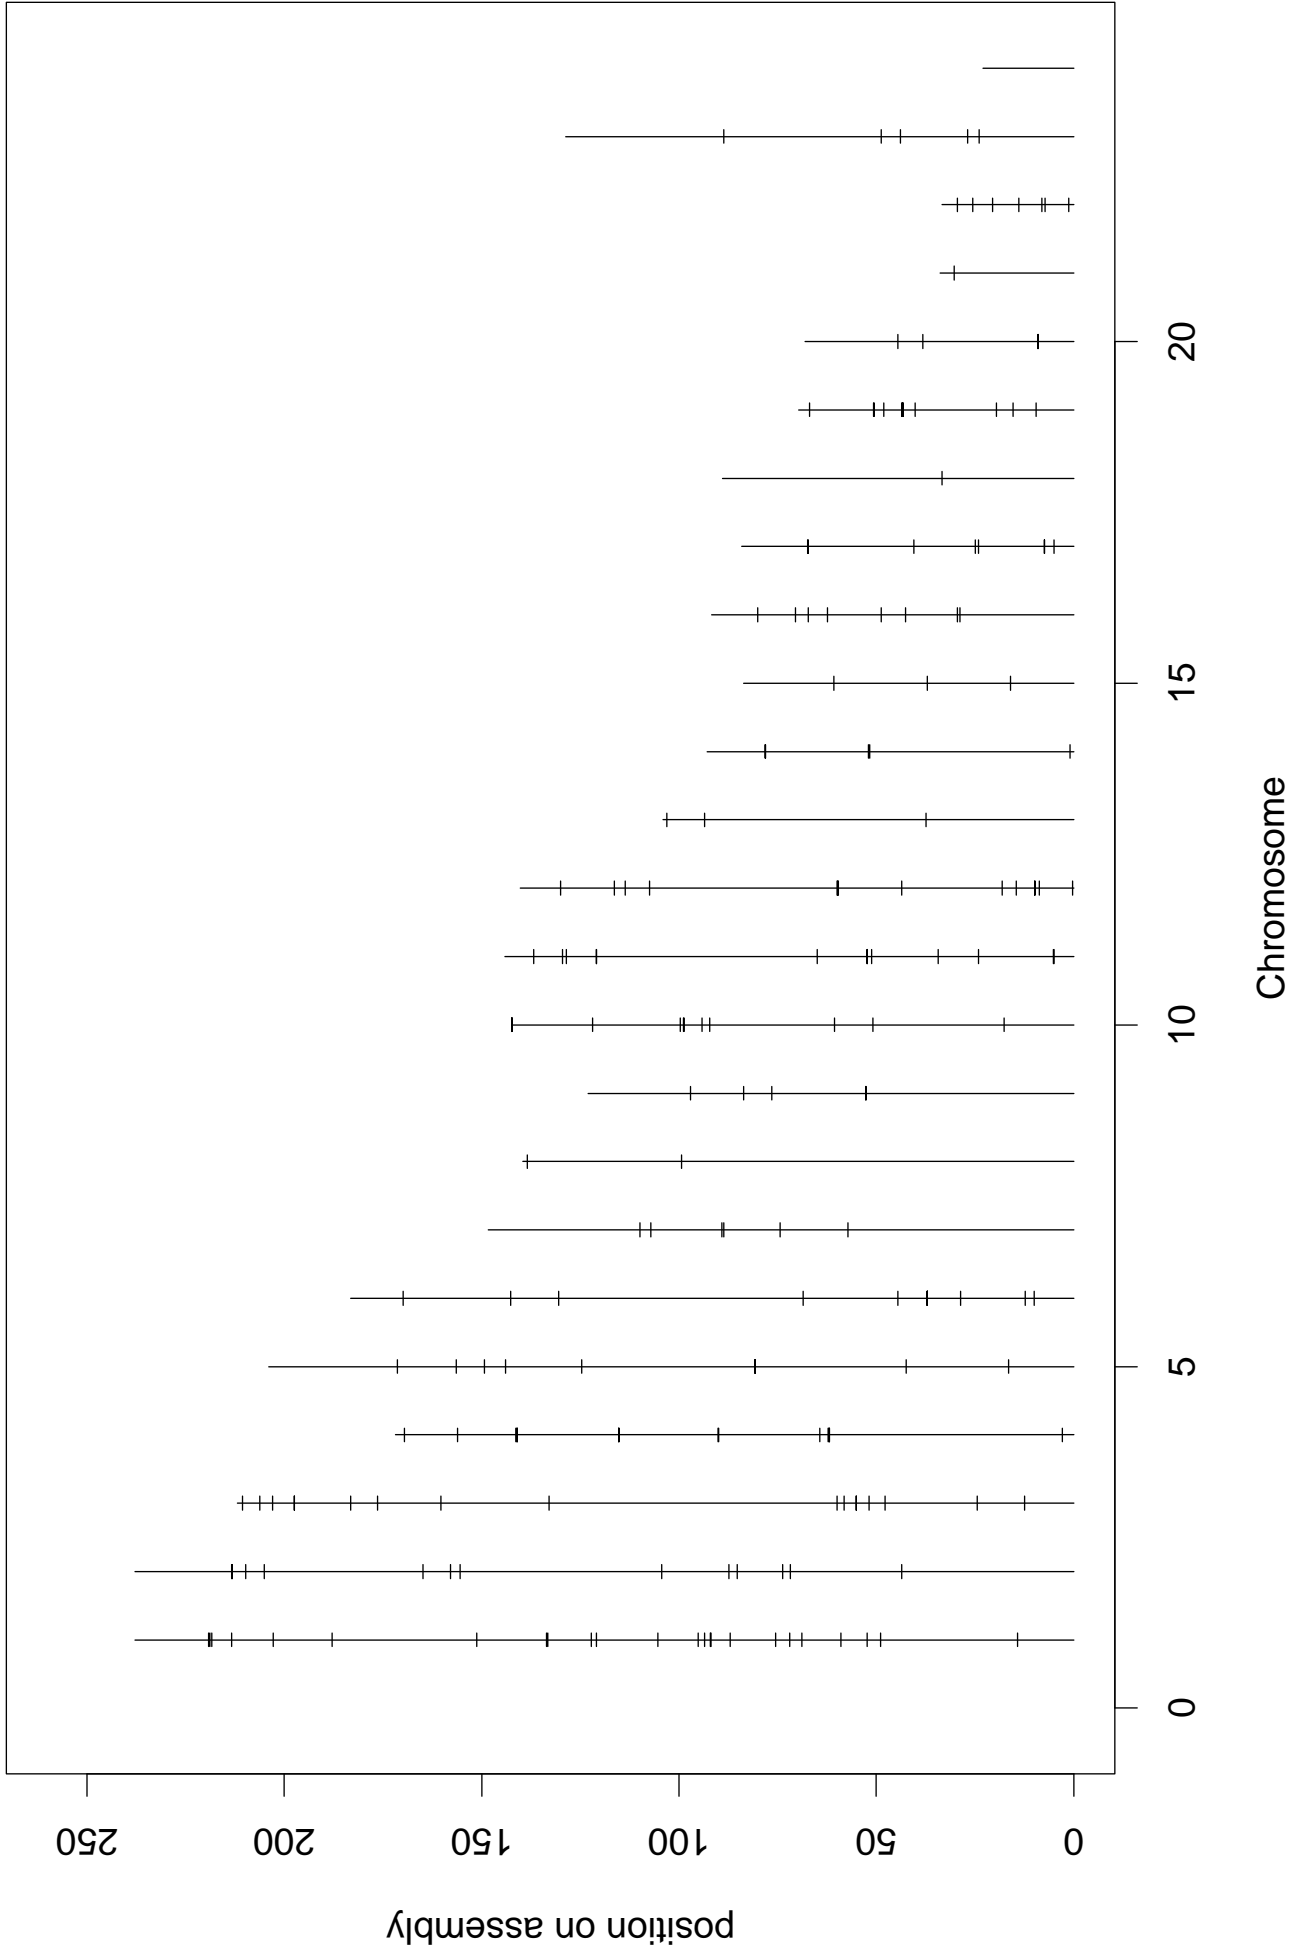



# breast

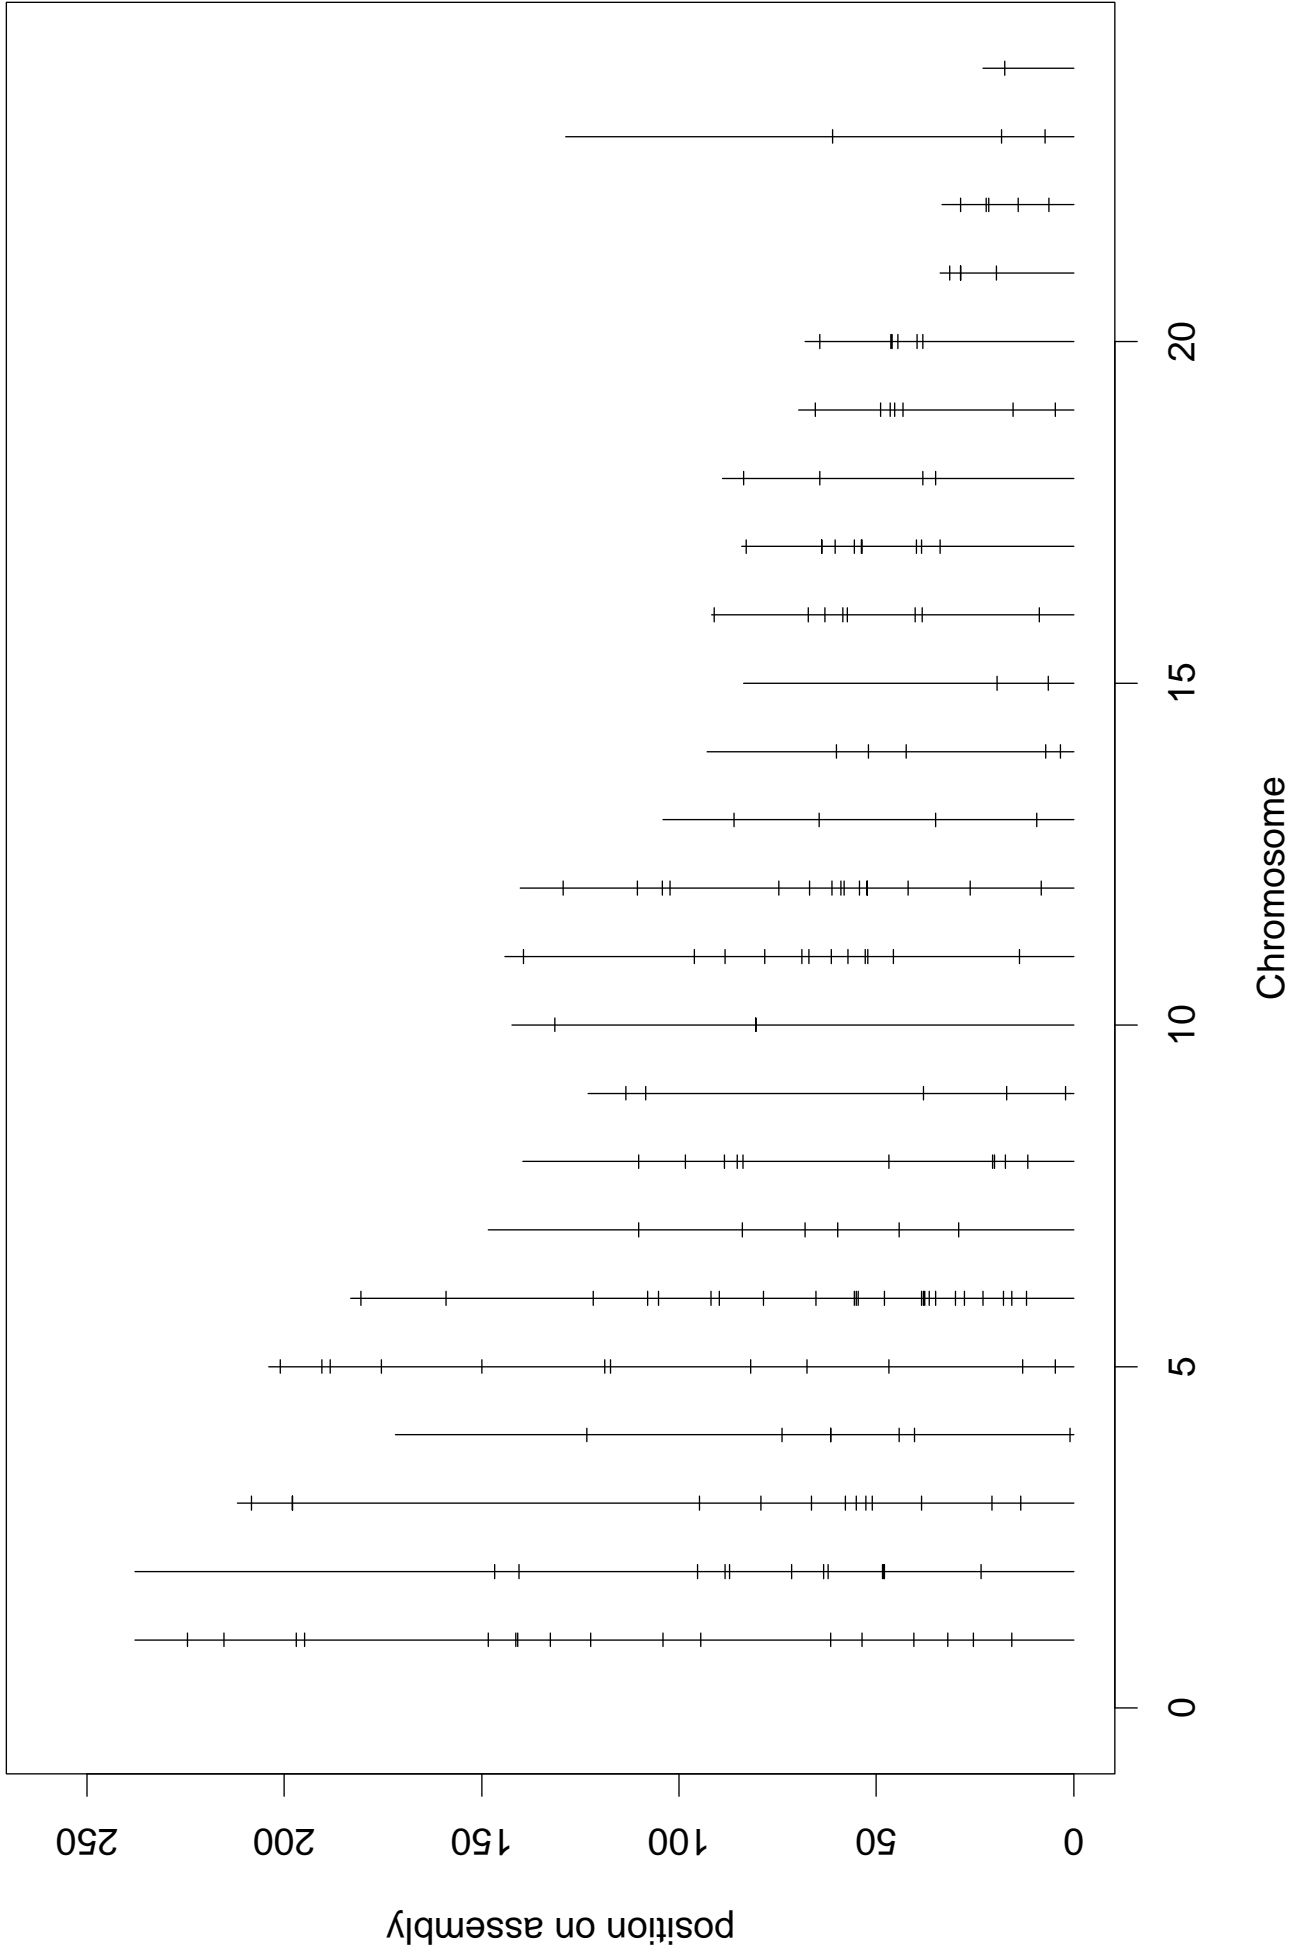



# spleen

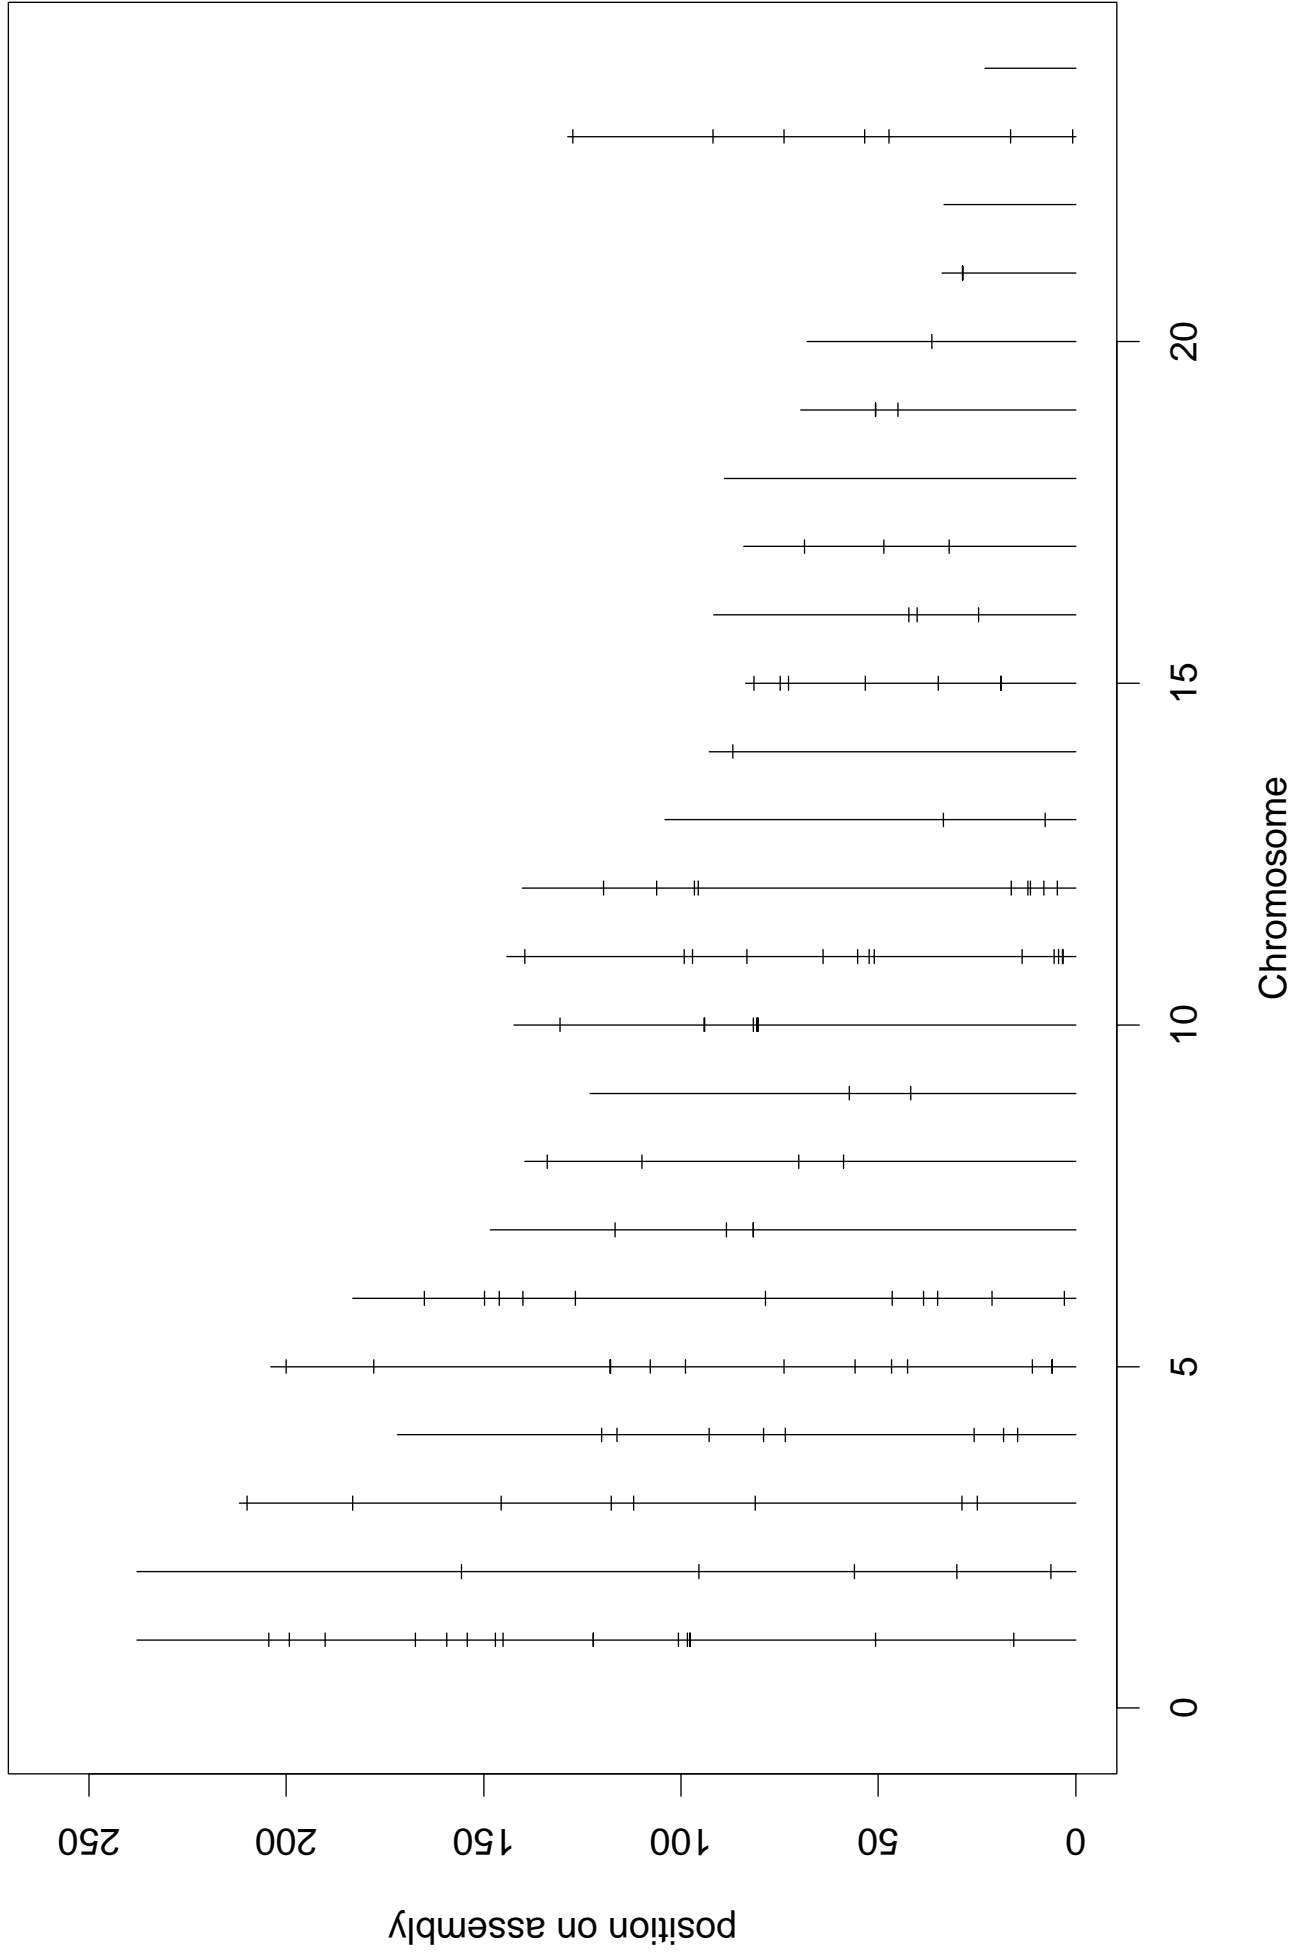

# retina

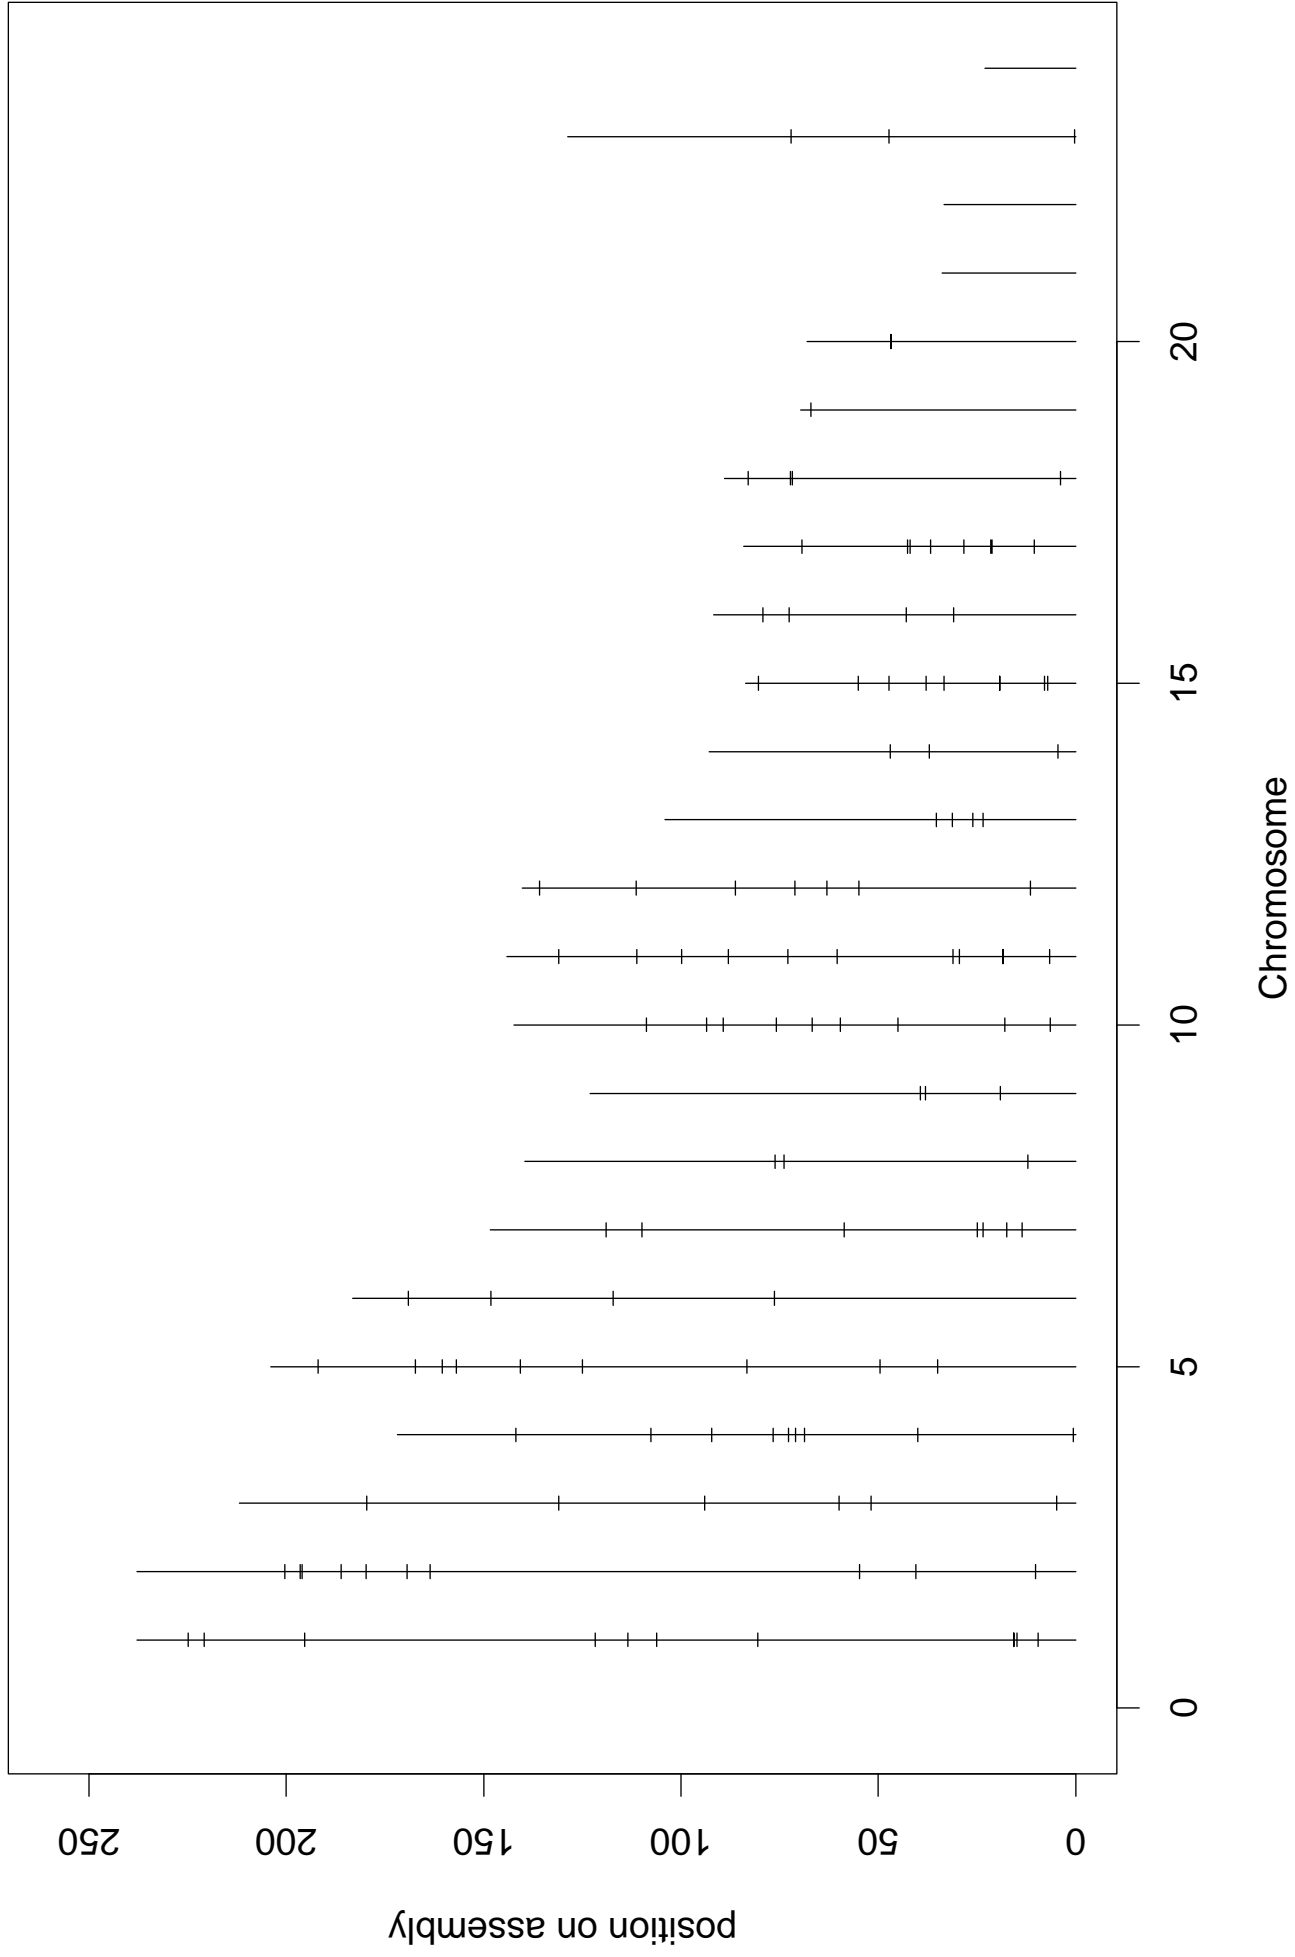

# germ cell

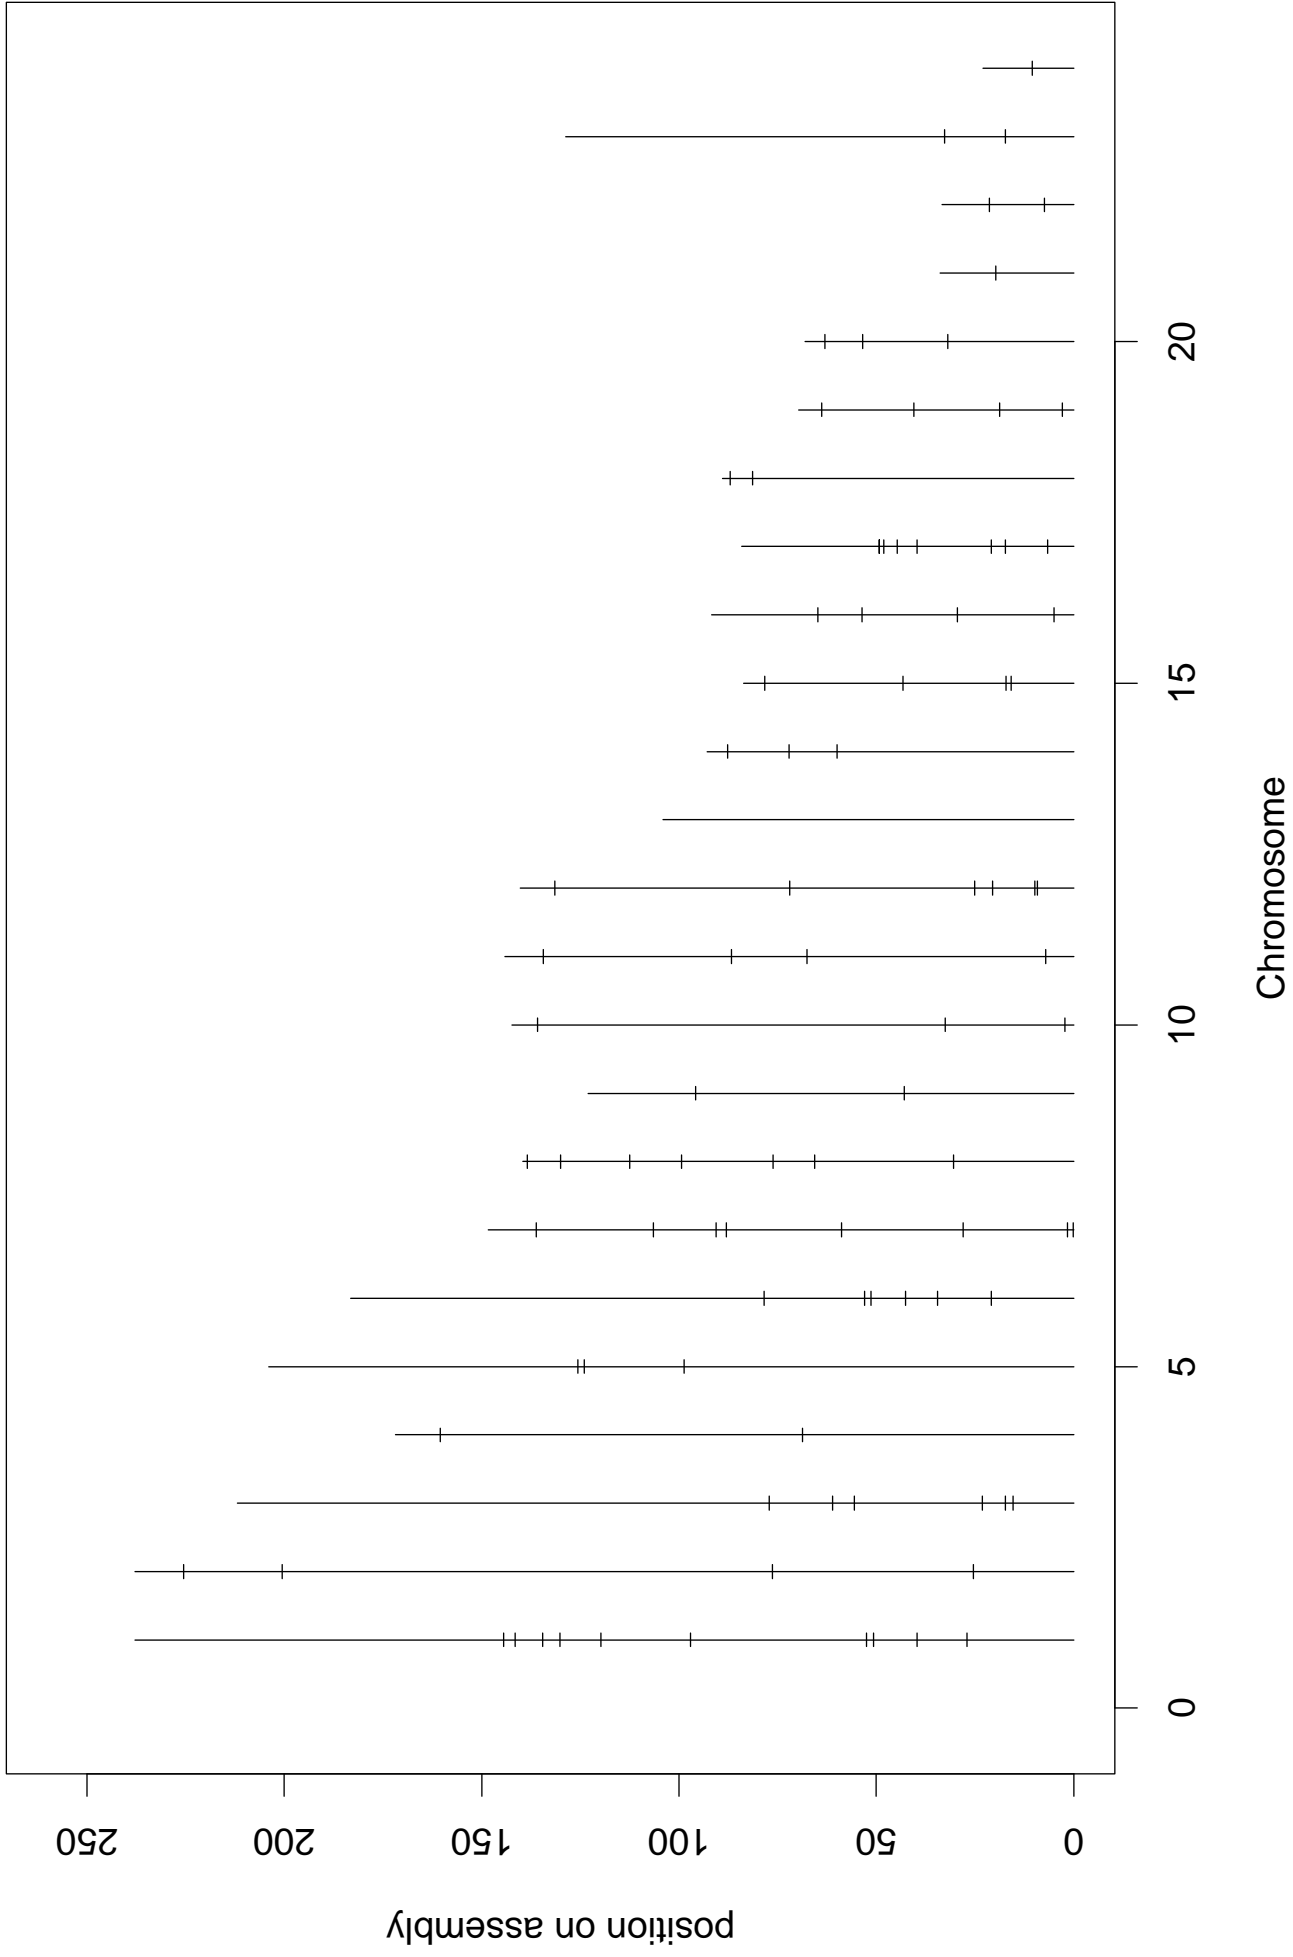



tumor

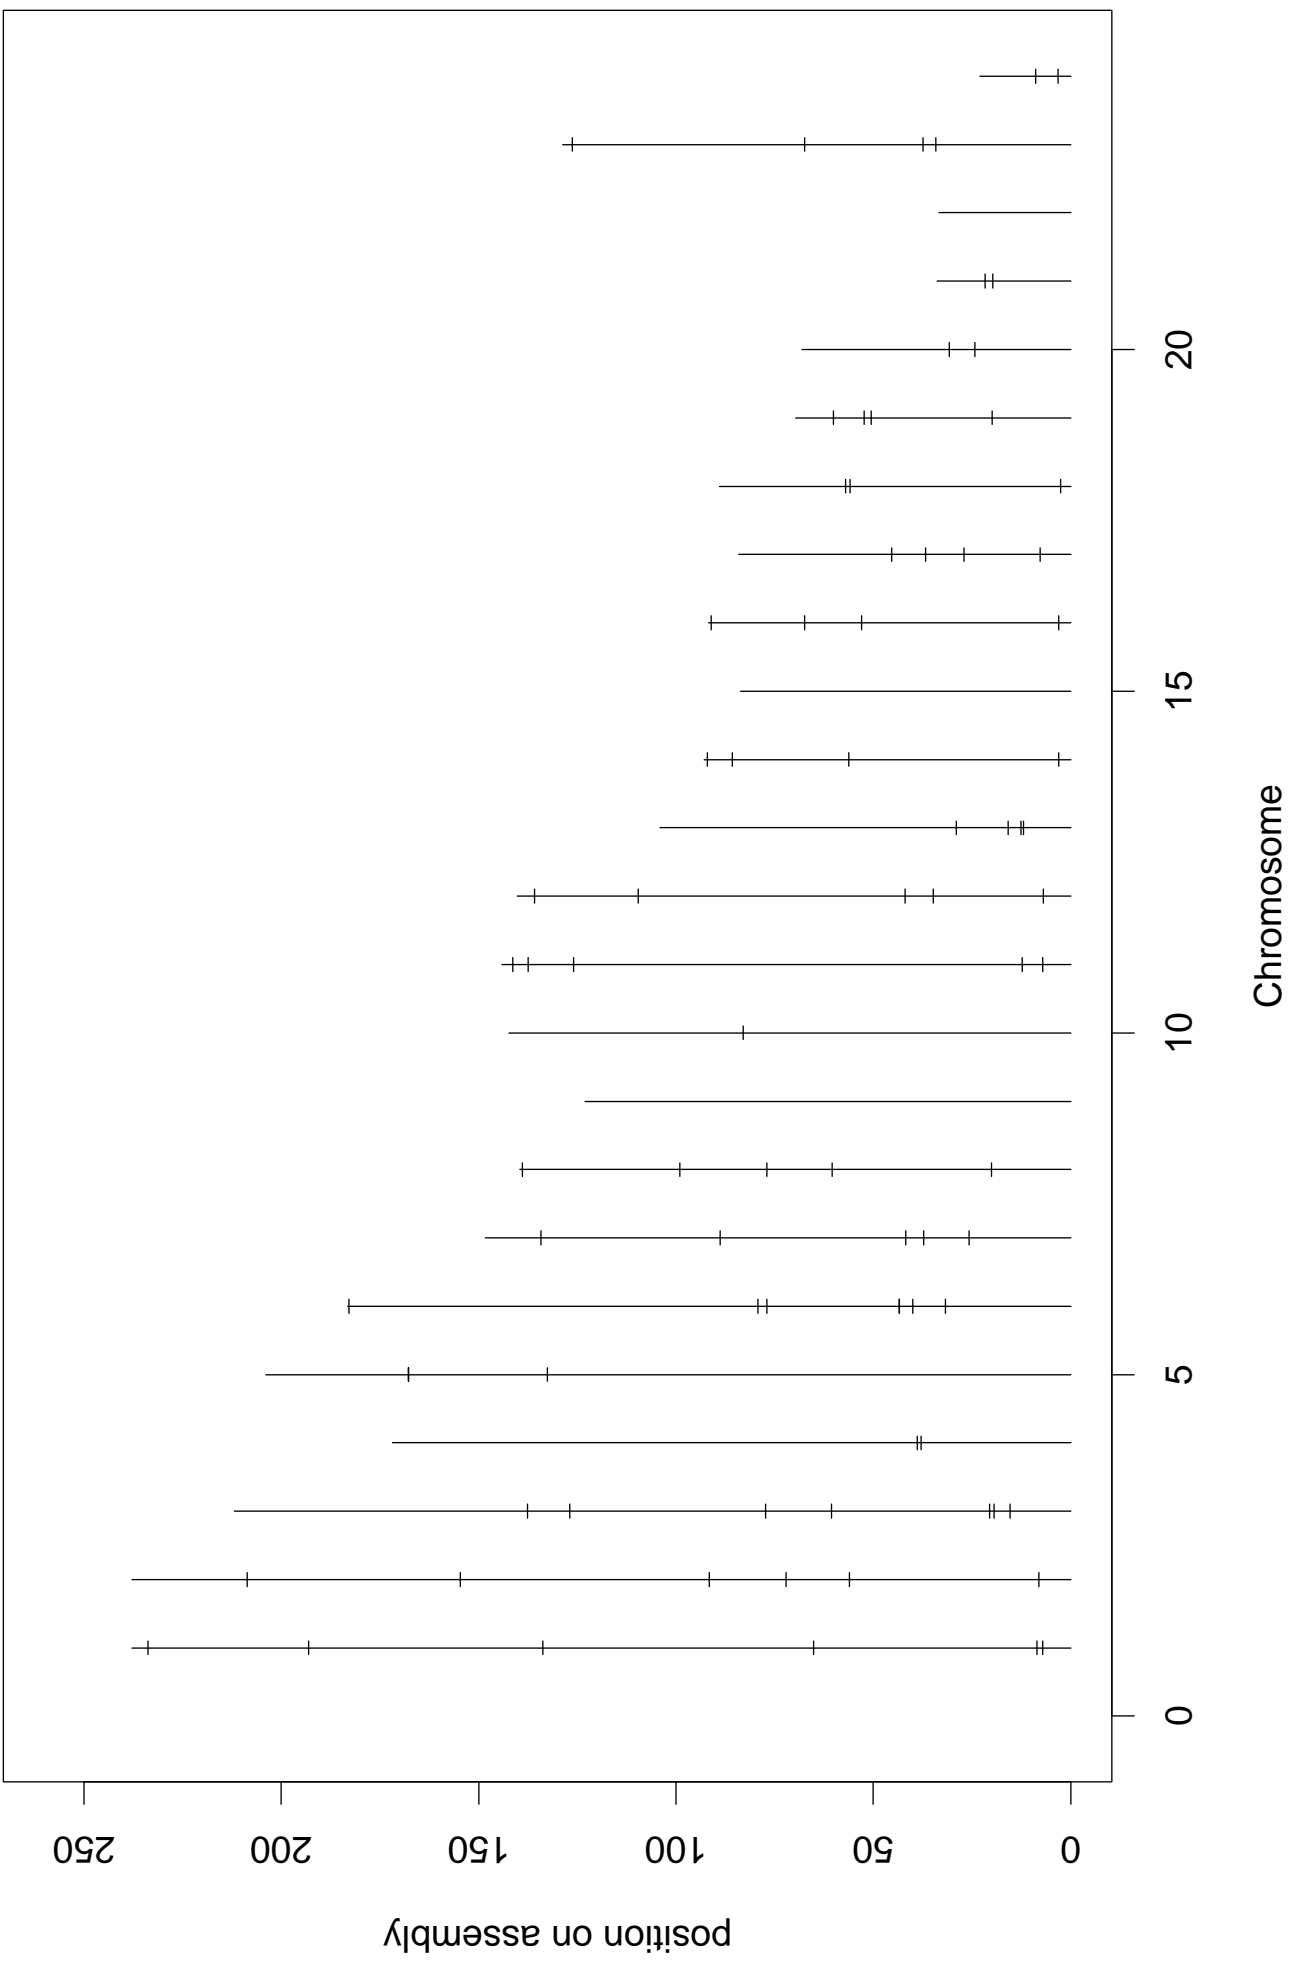

# muscle

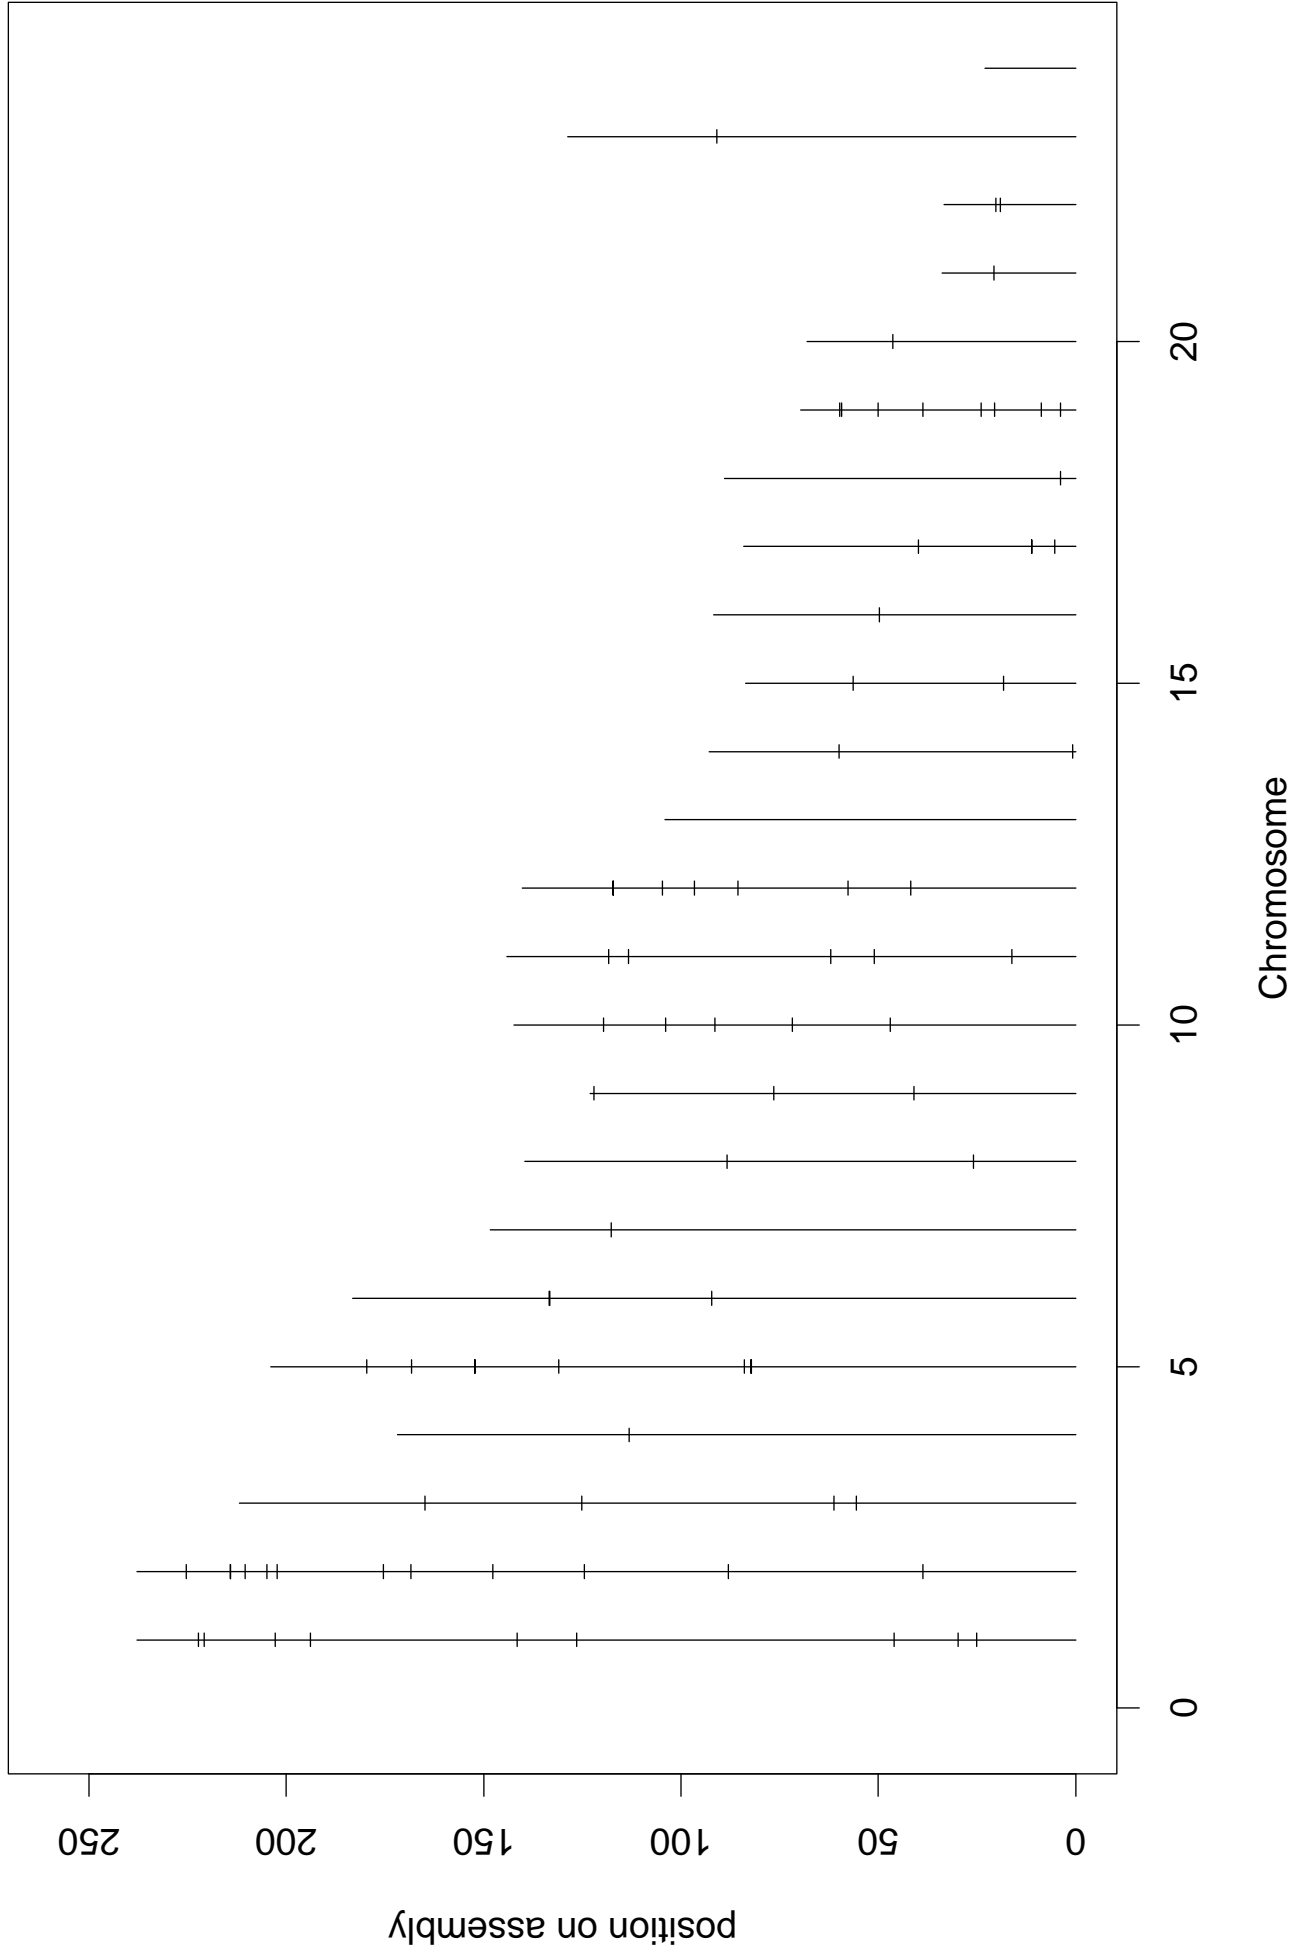



# ovary

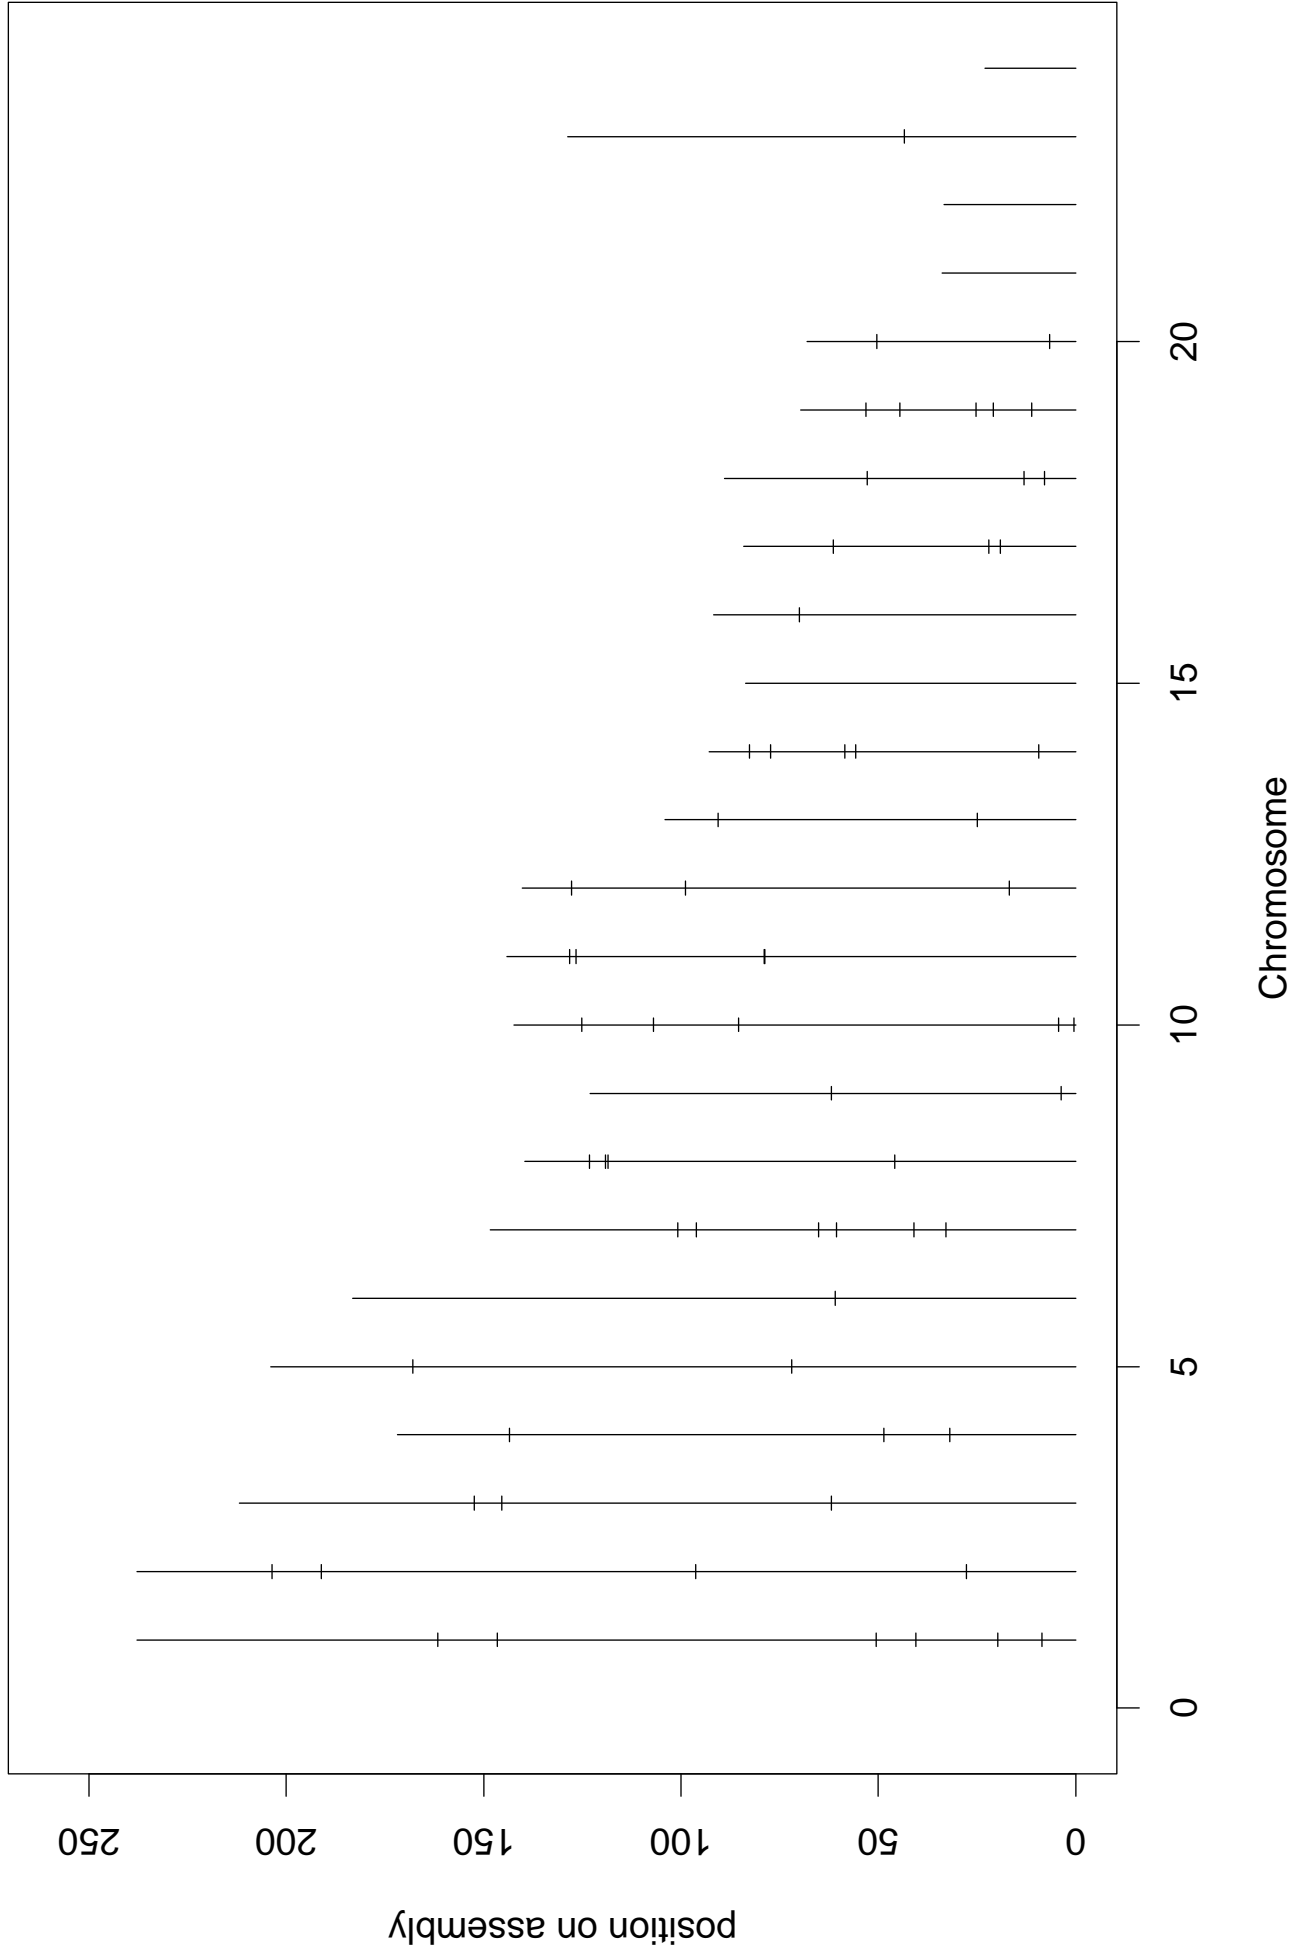



tonsil

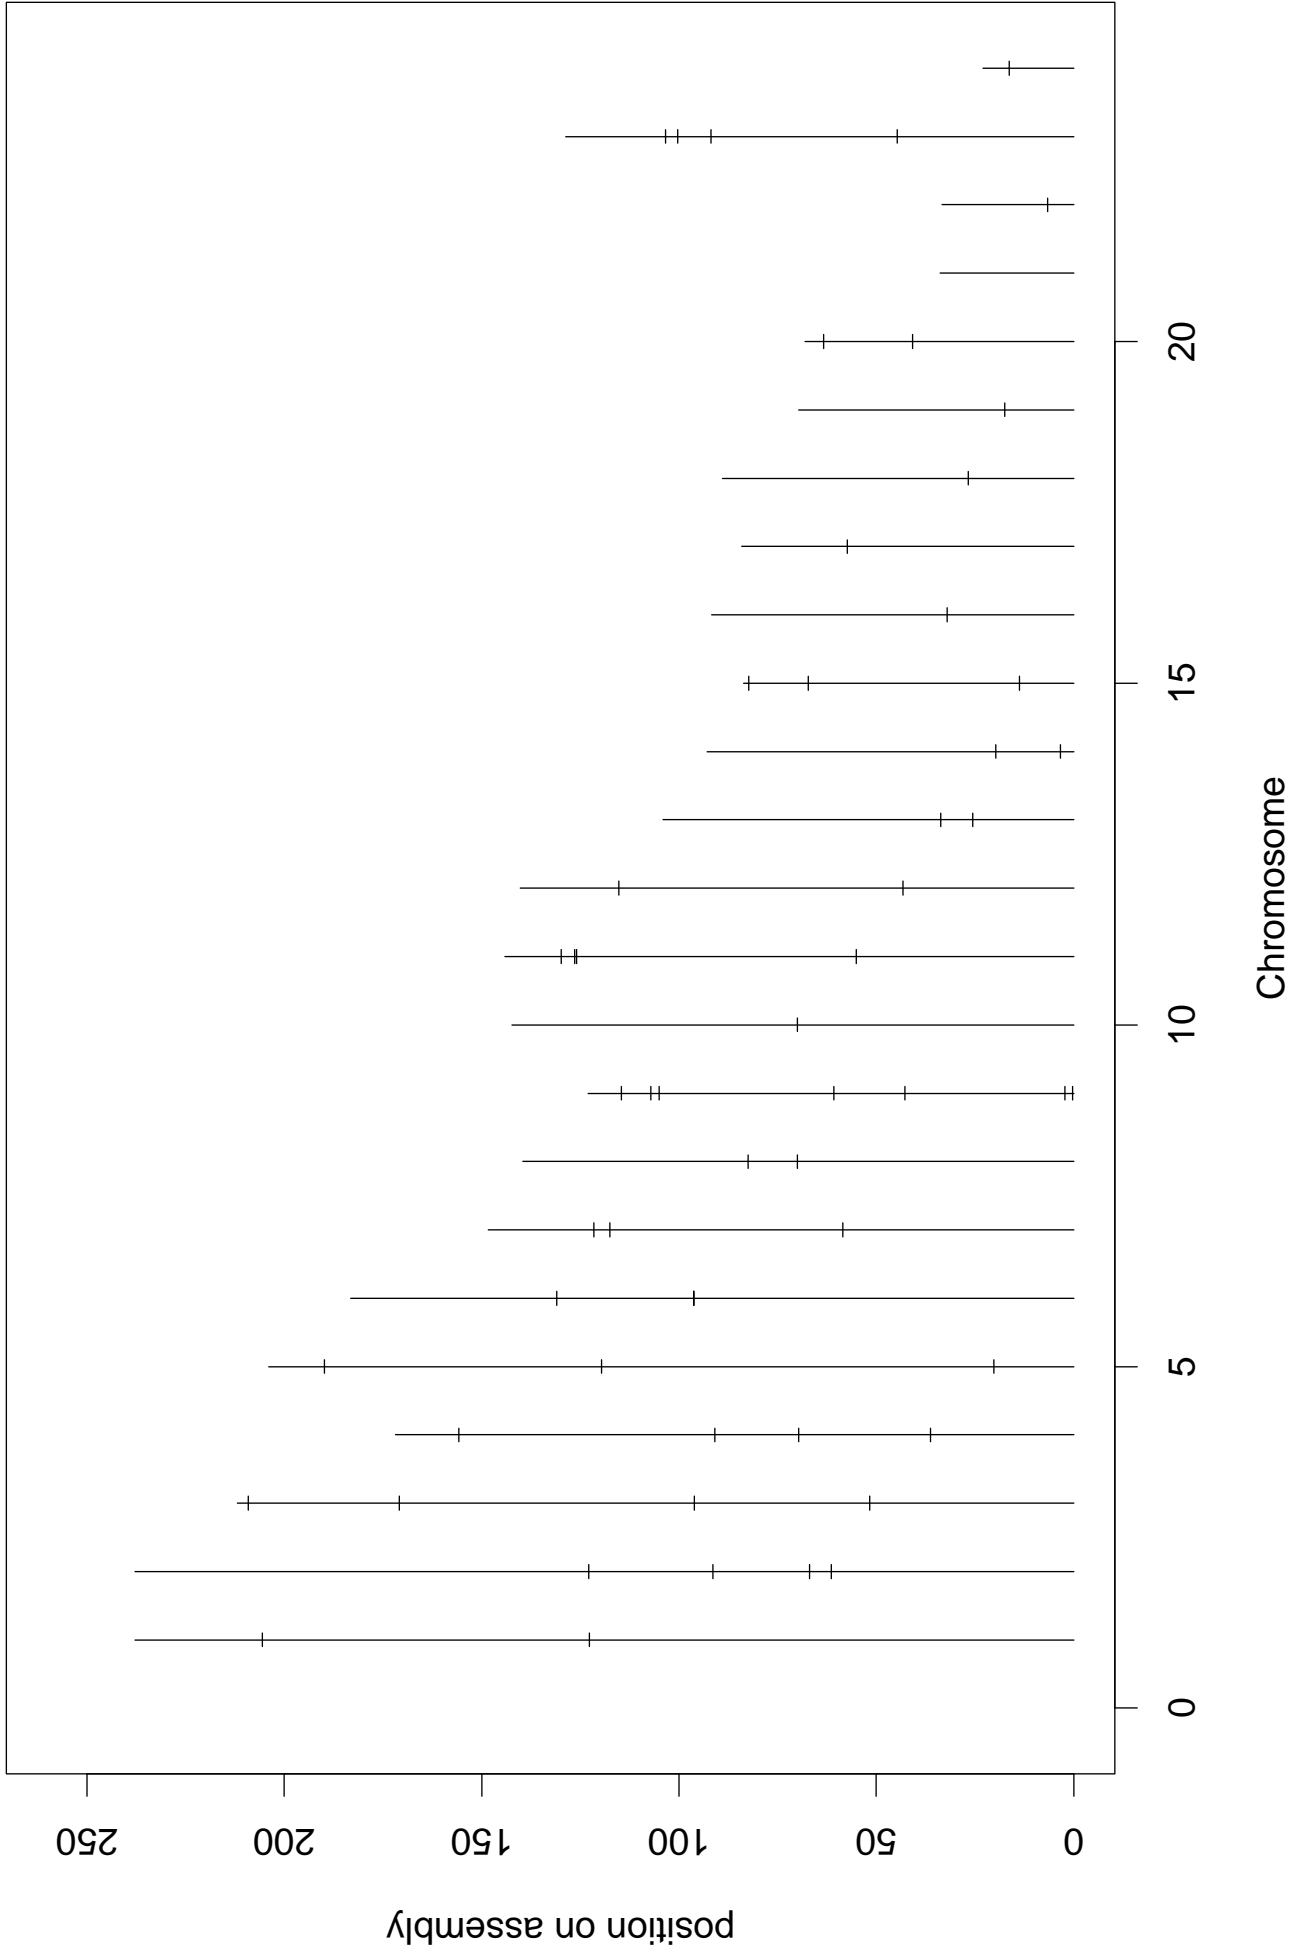

# pancreas

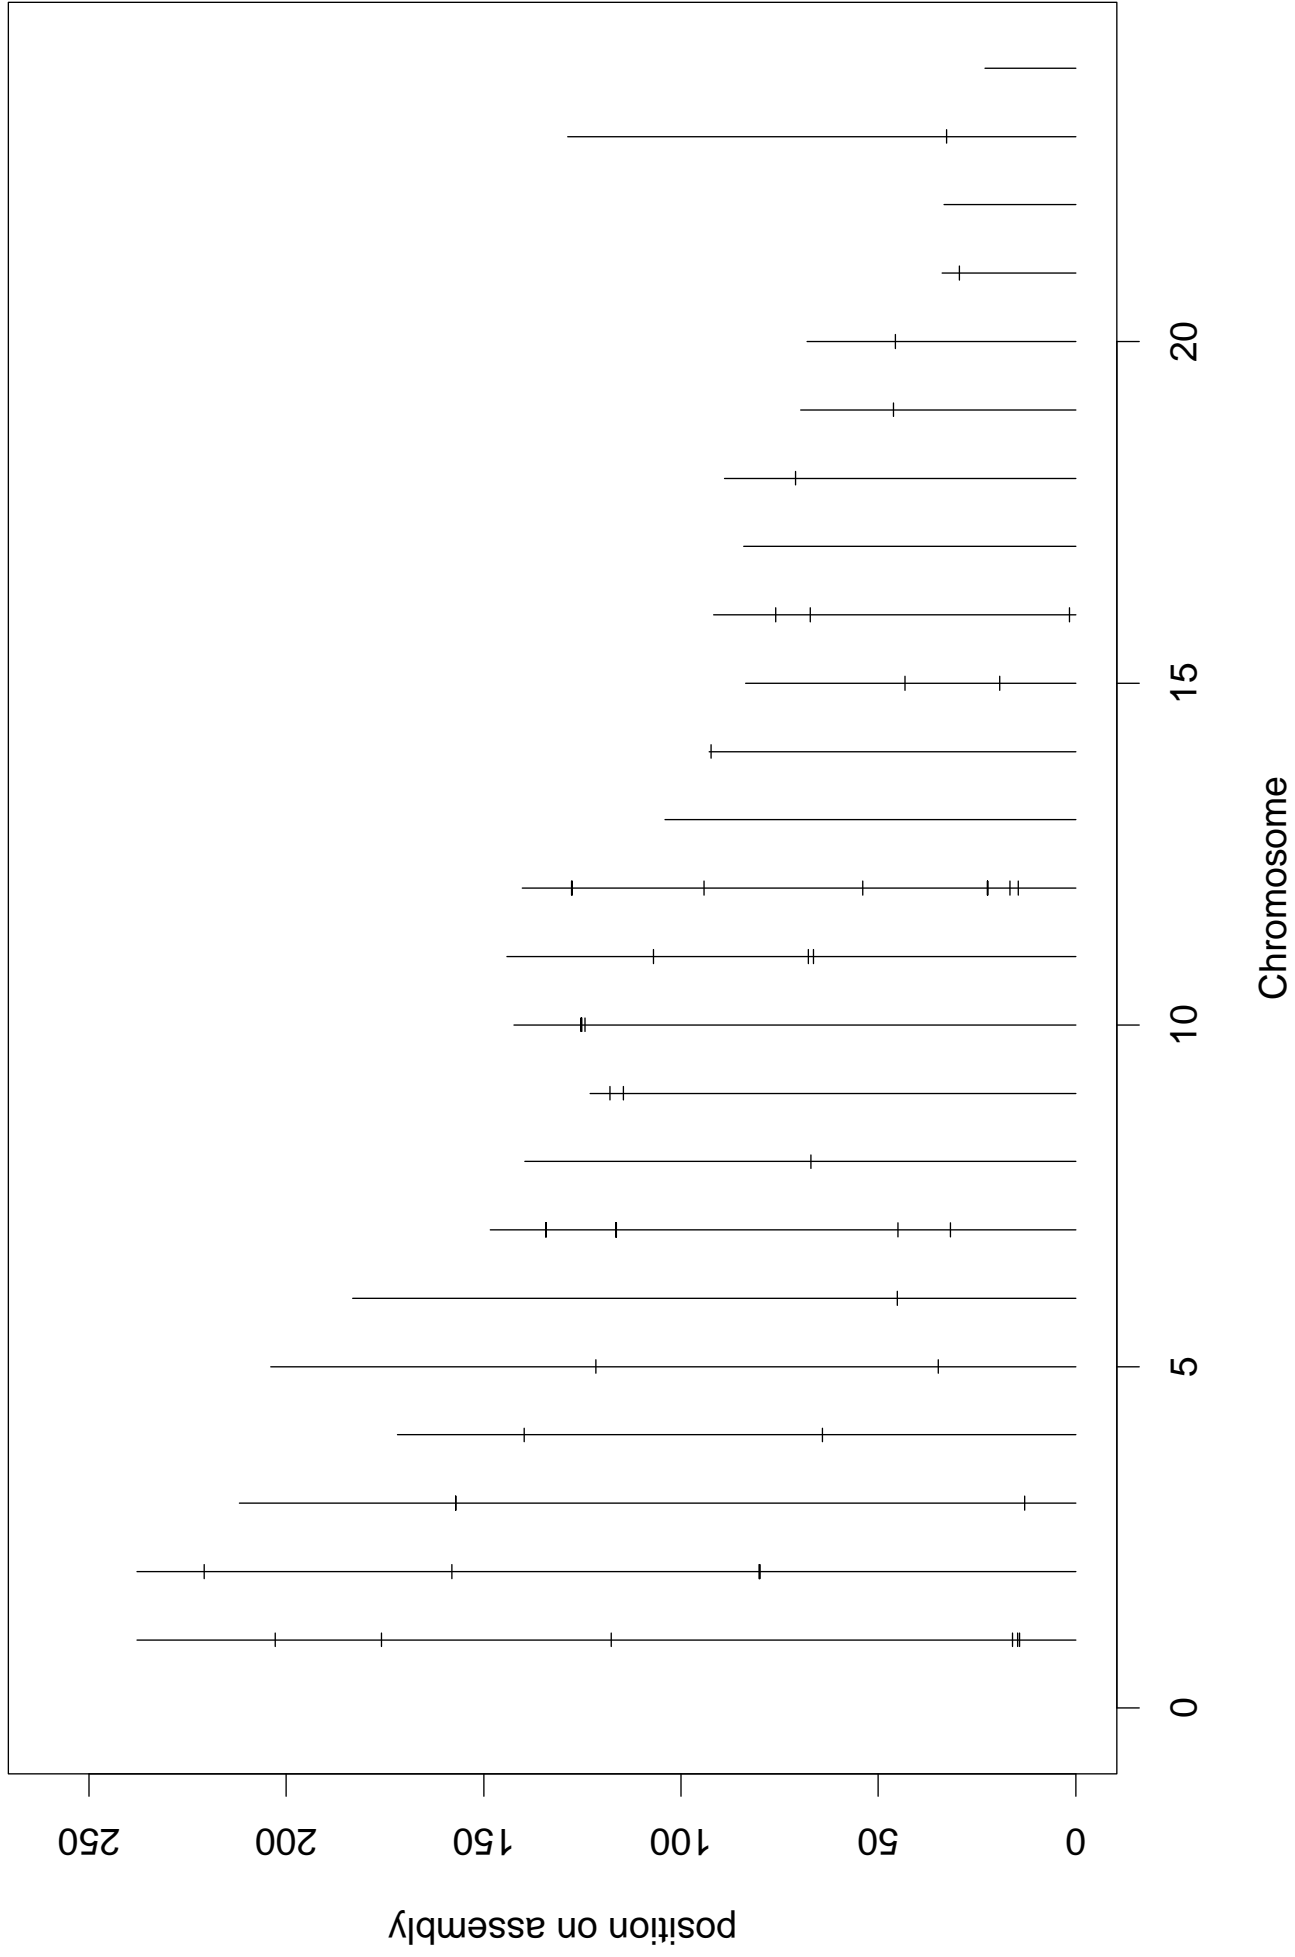

colon

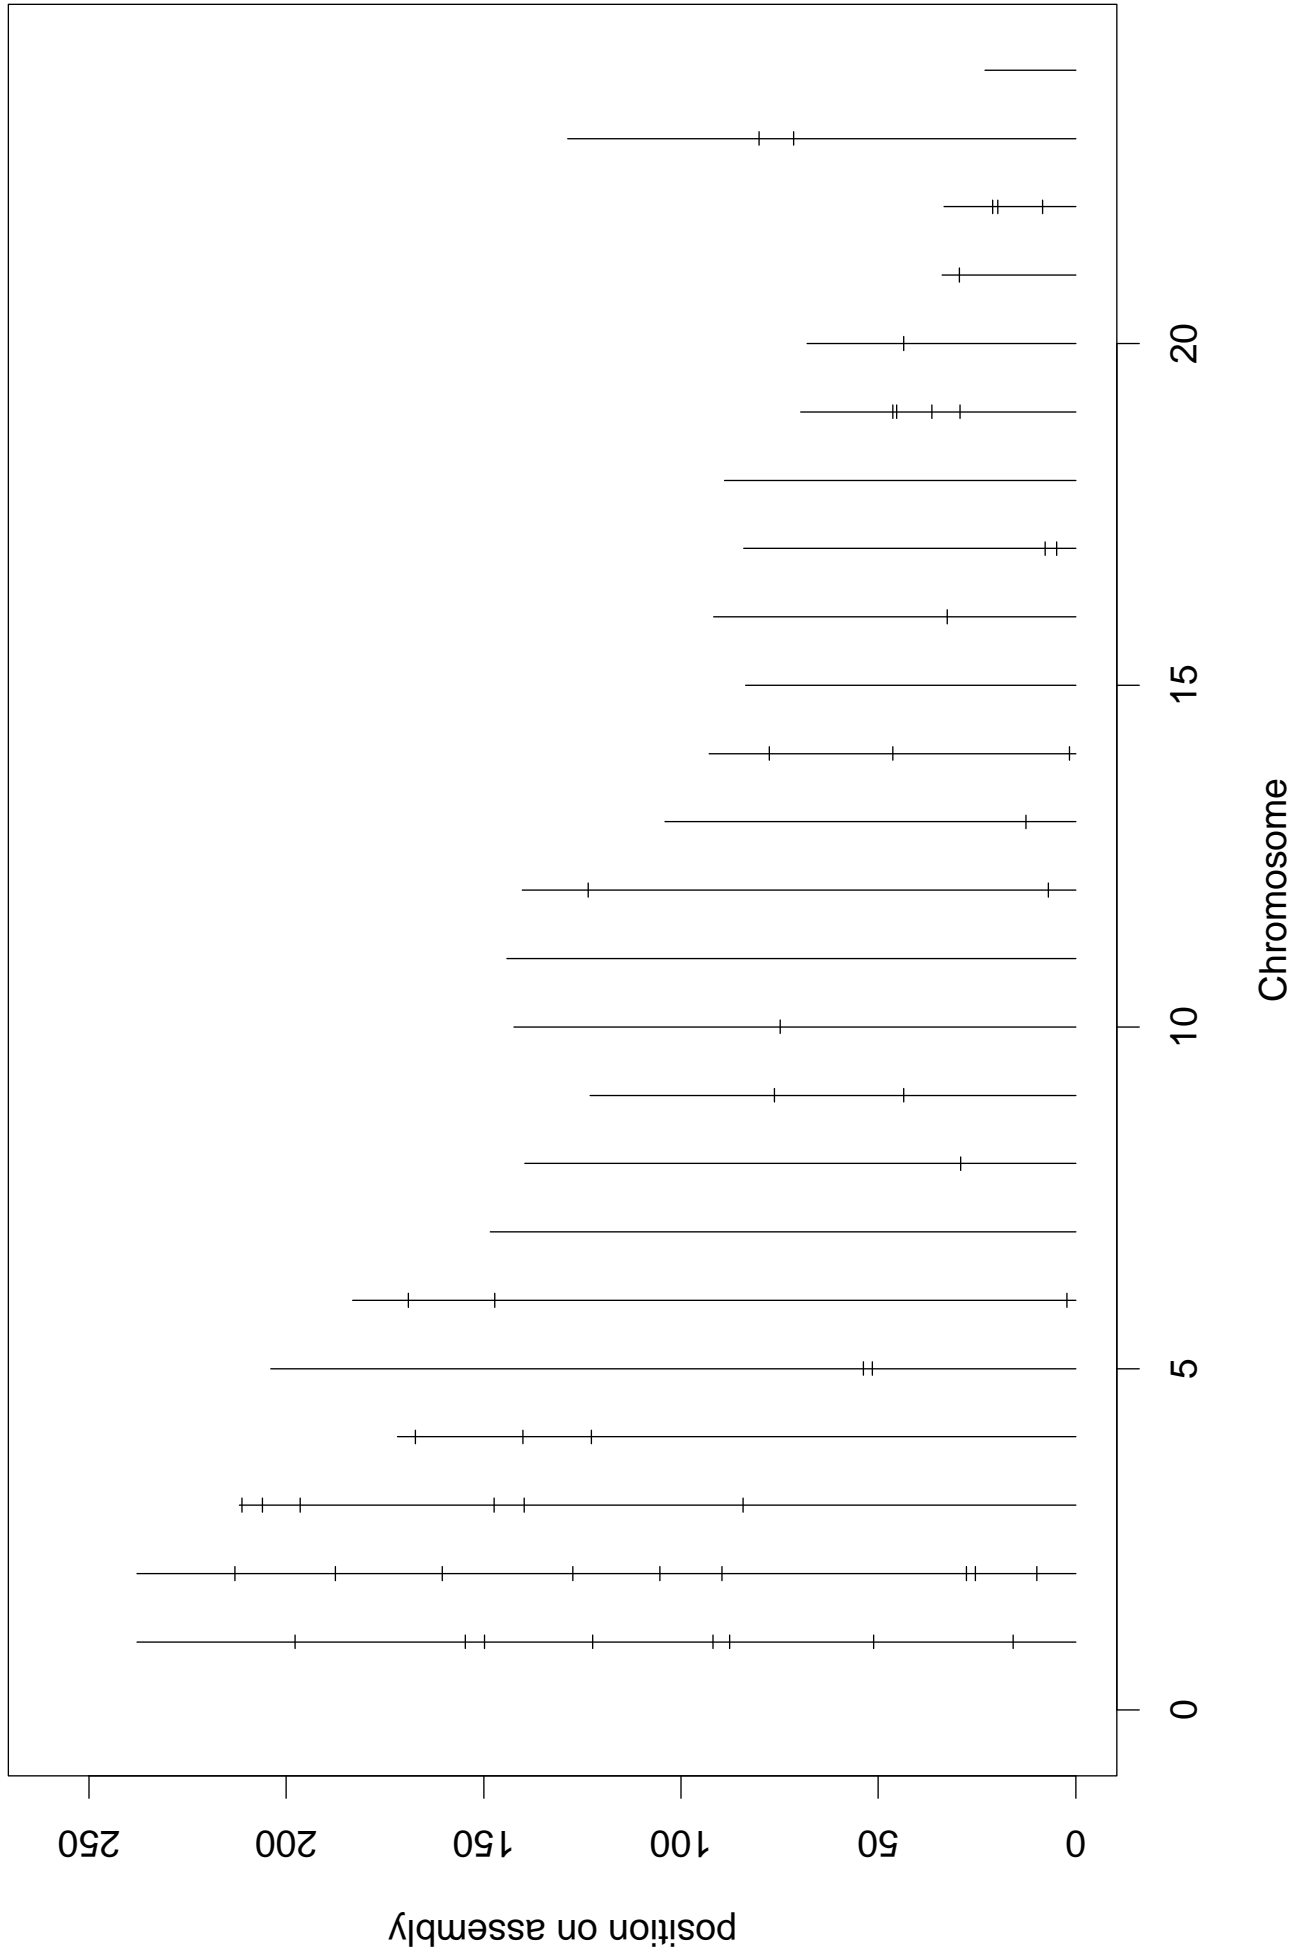



# stomach

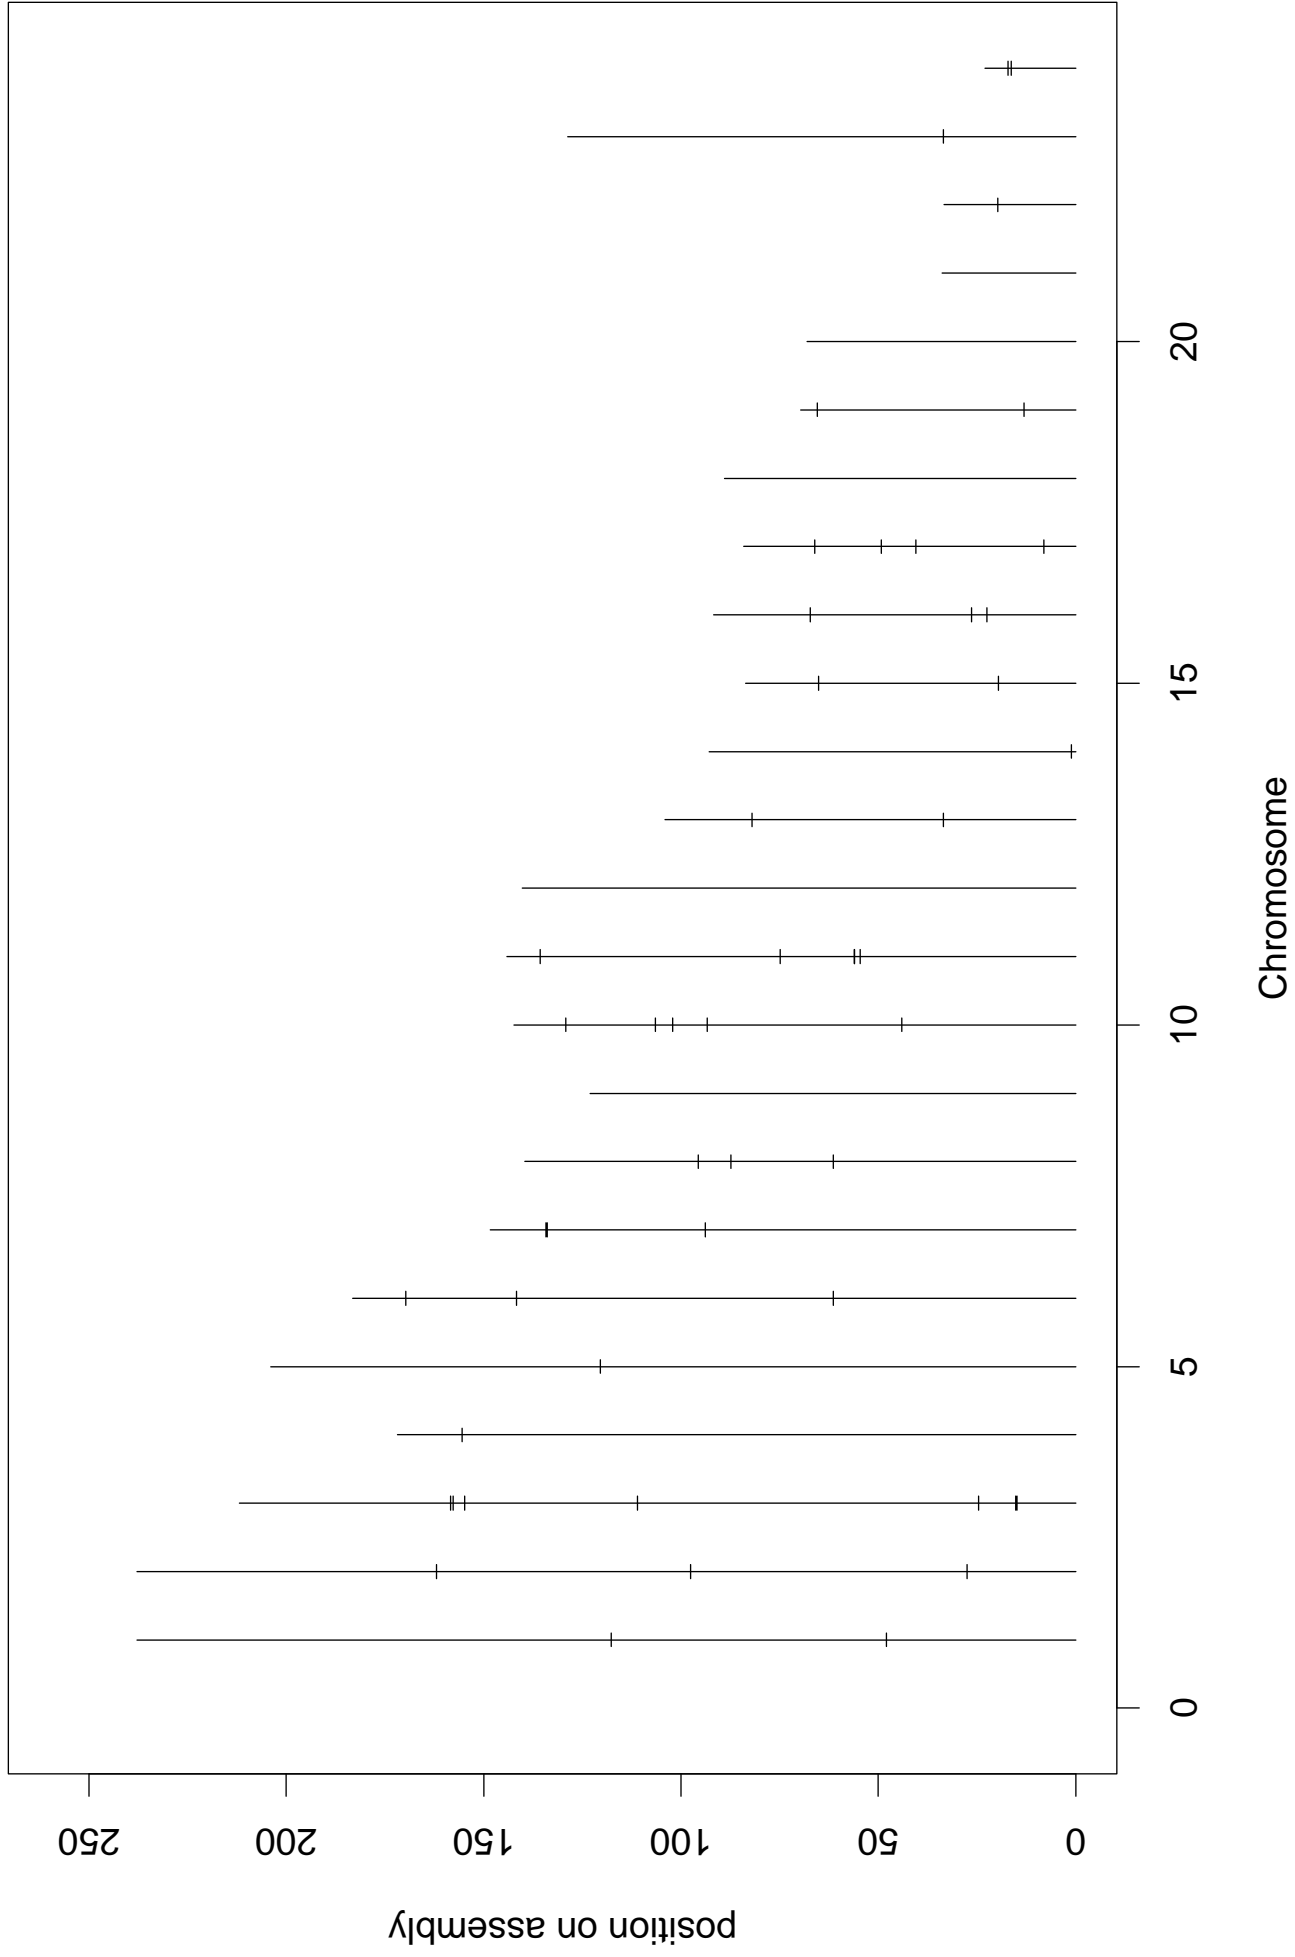

# lung

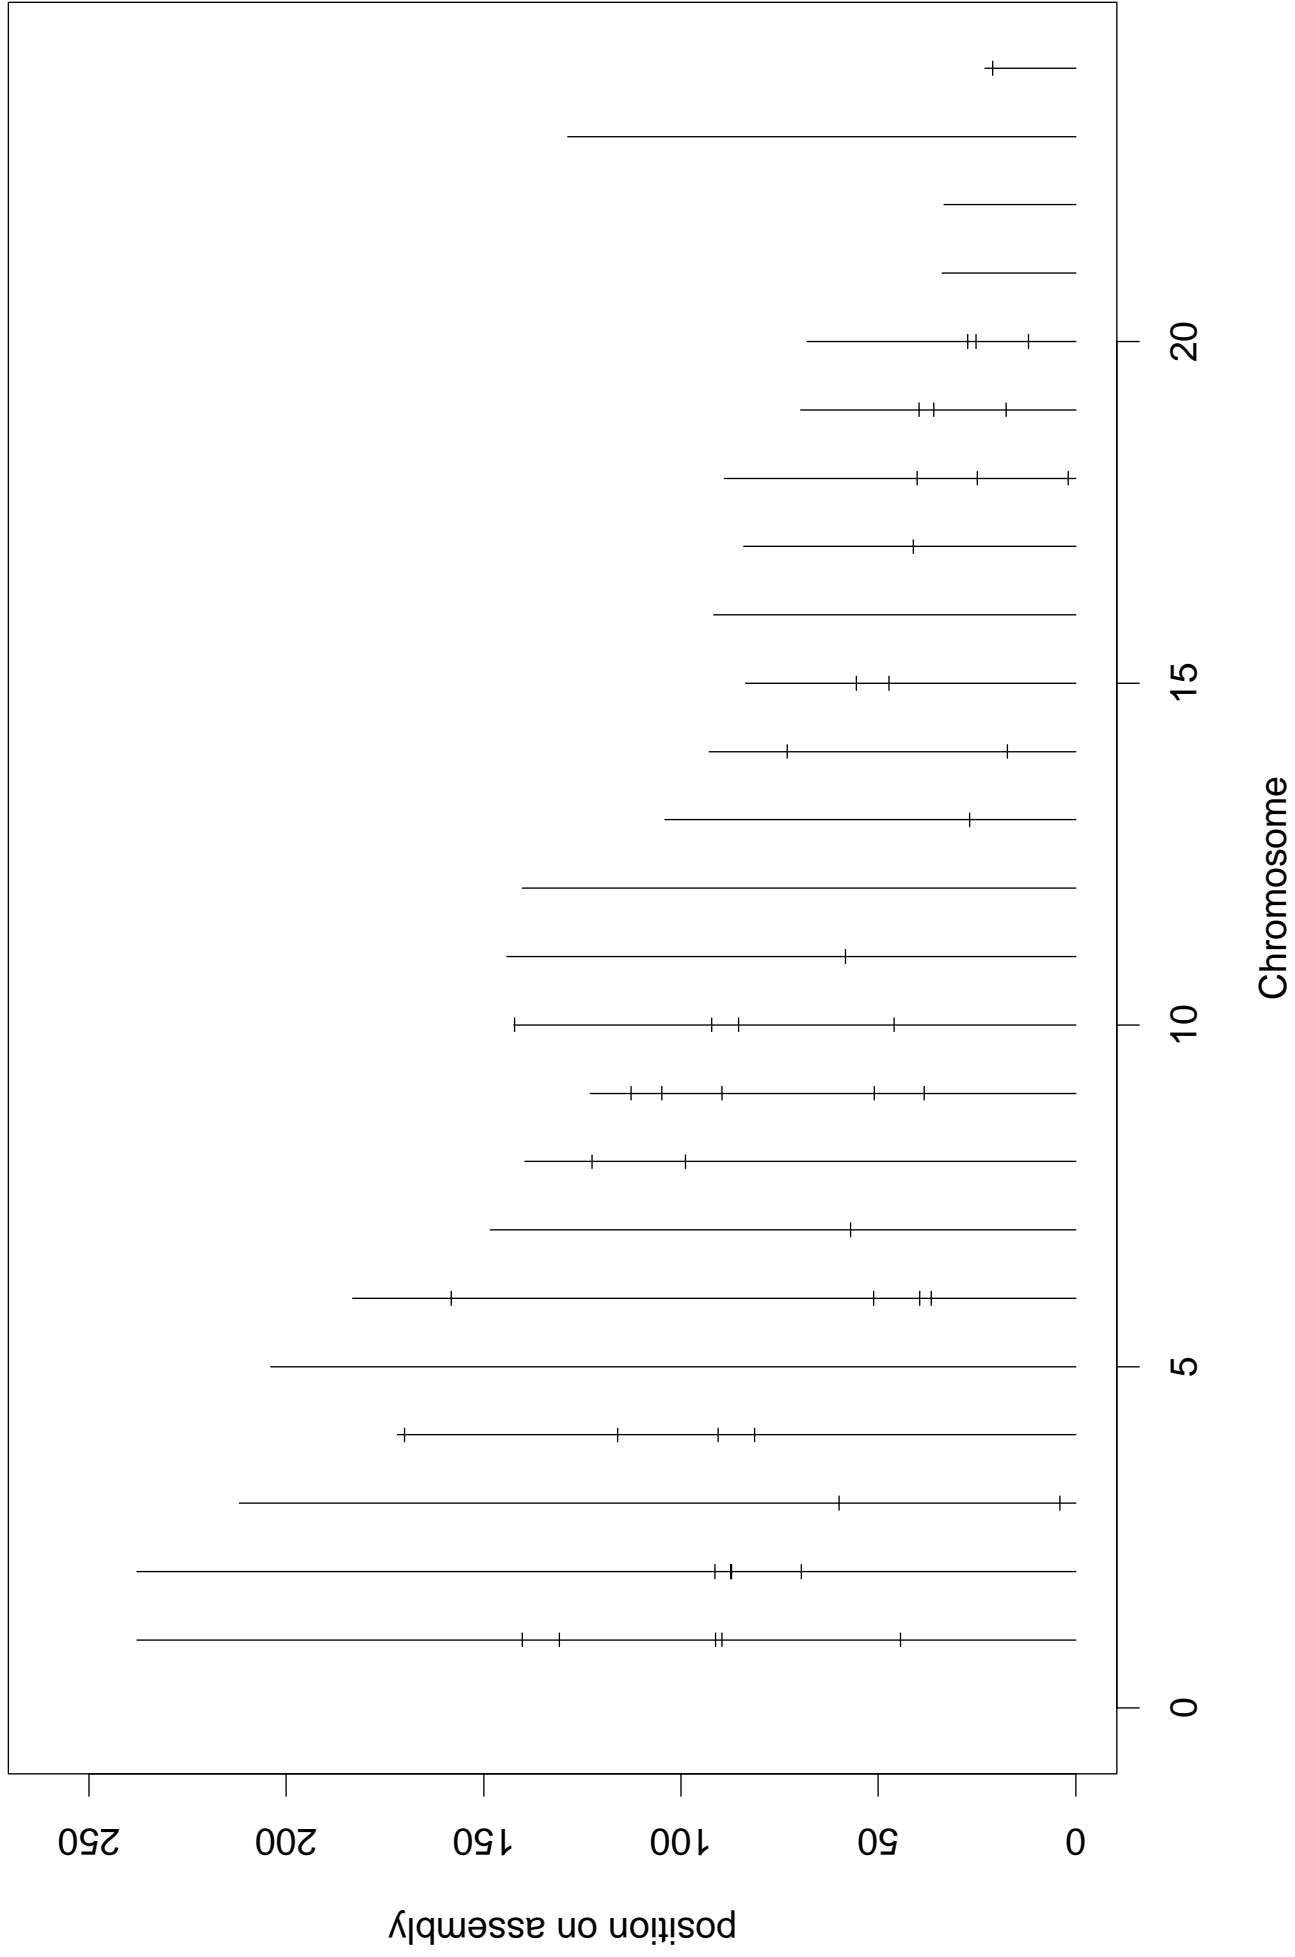



# prostate

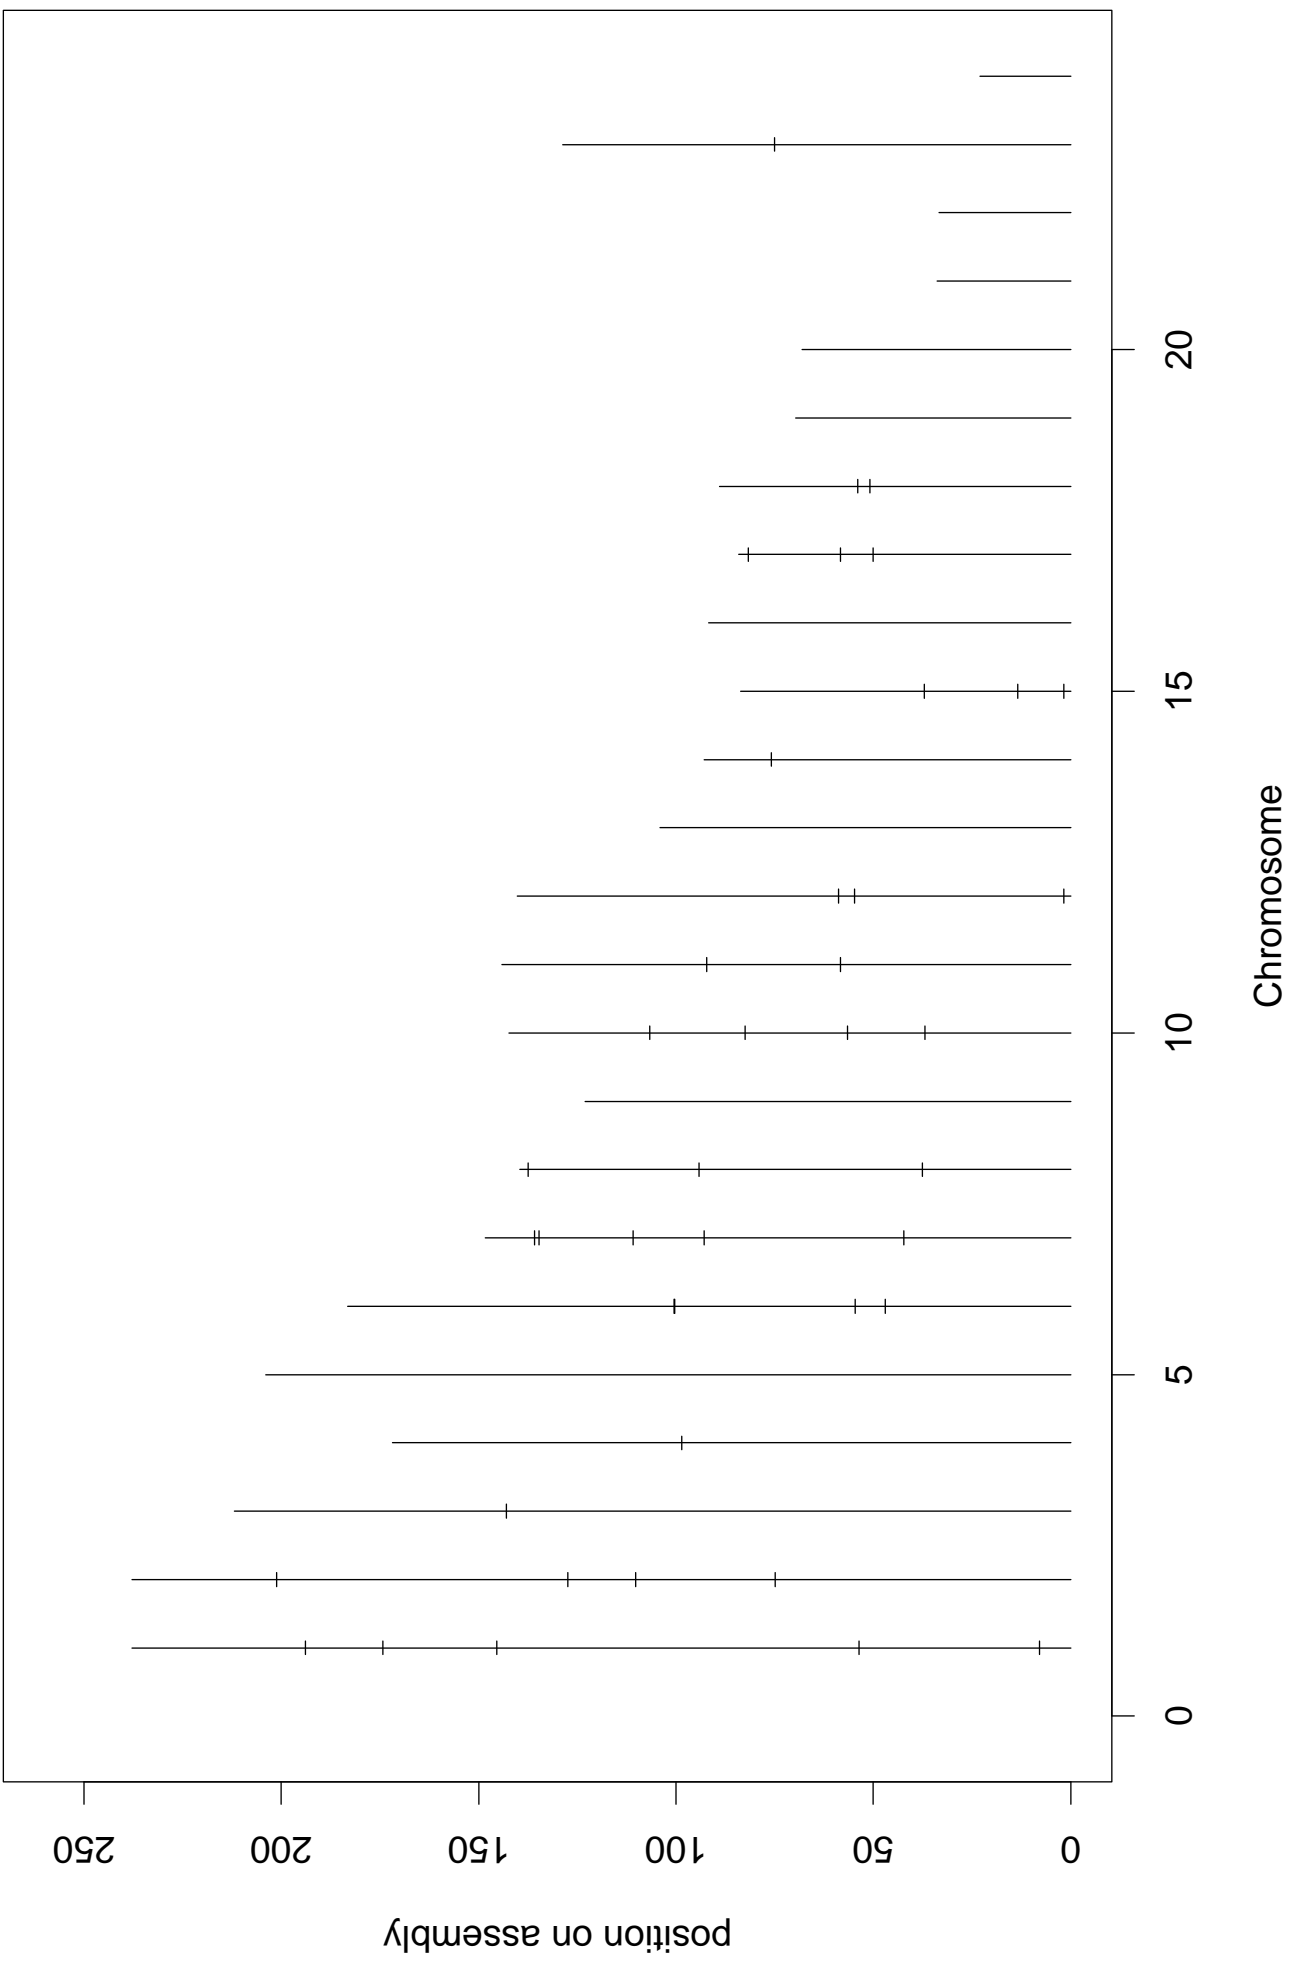

pregnant

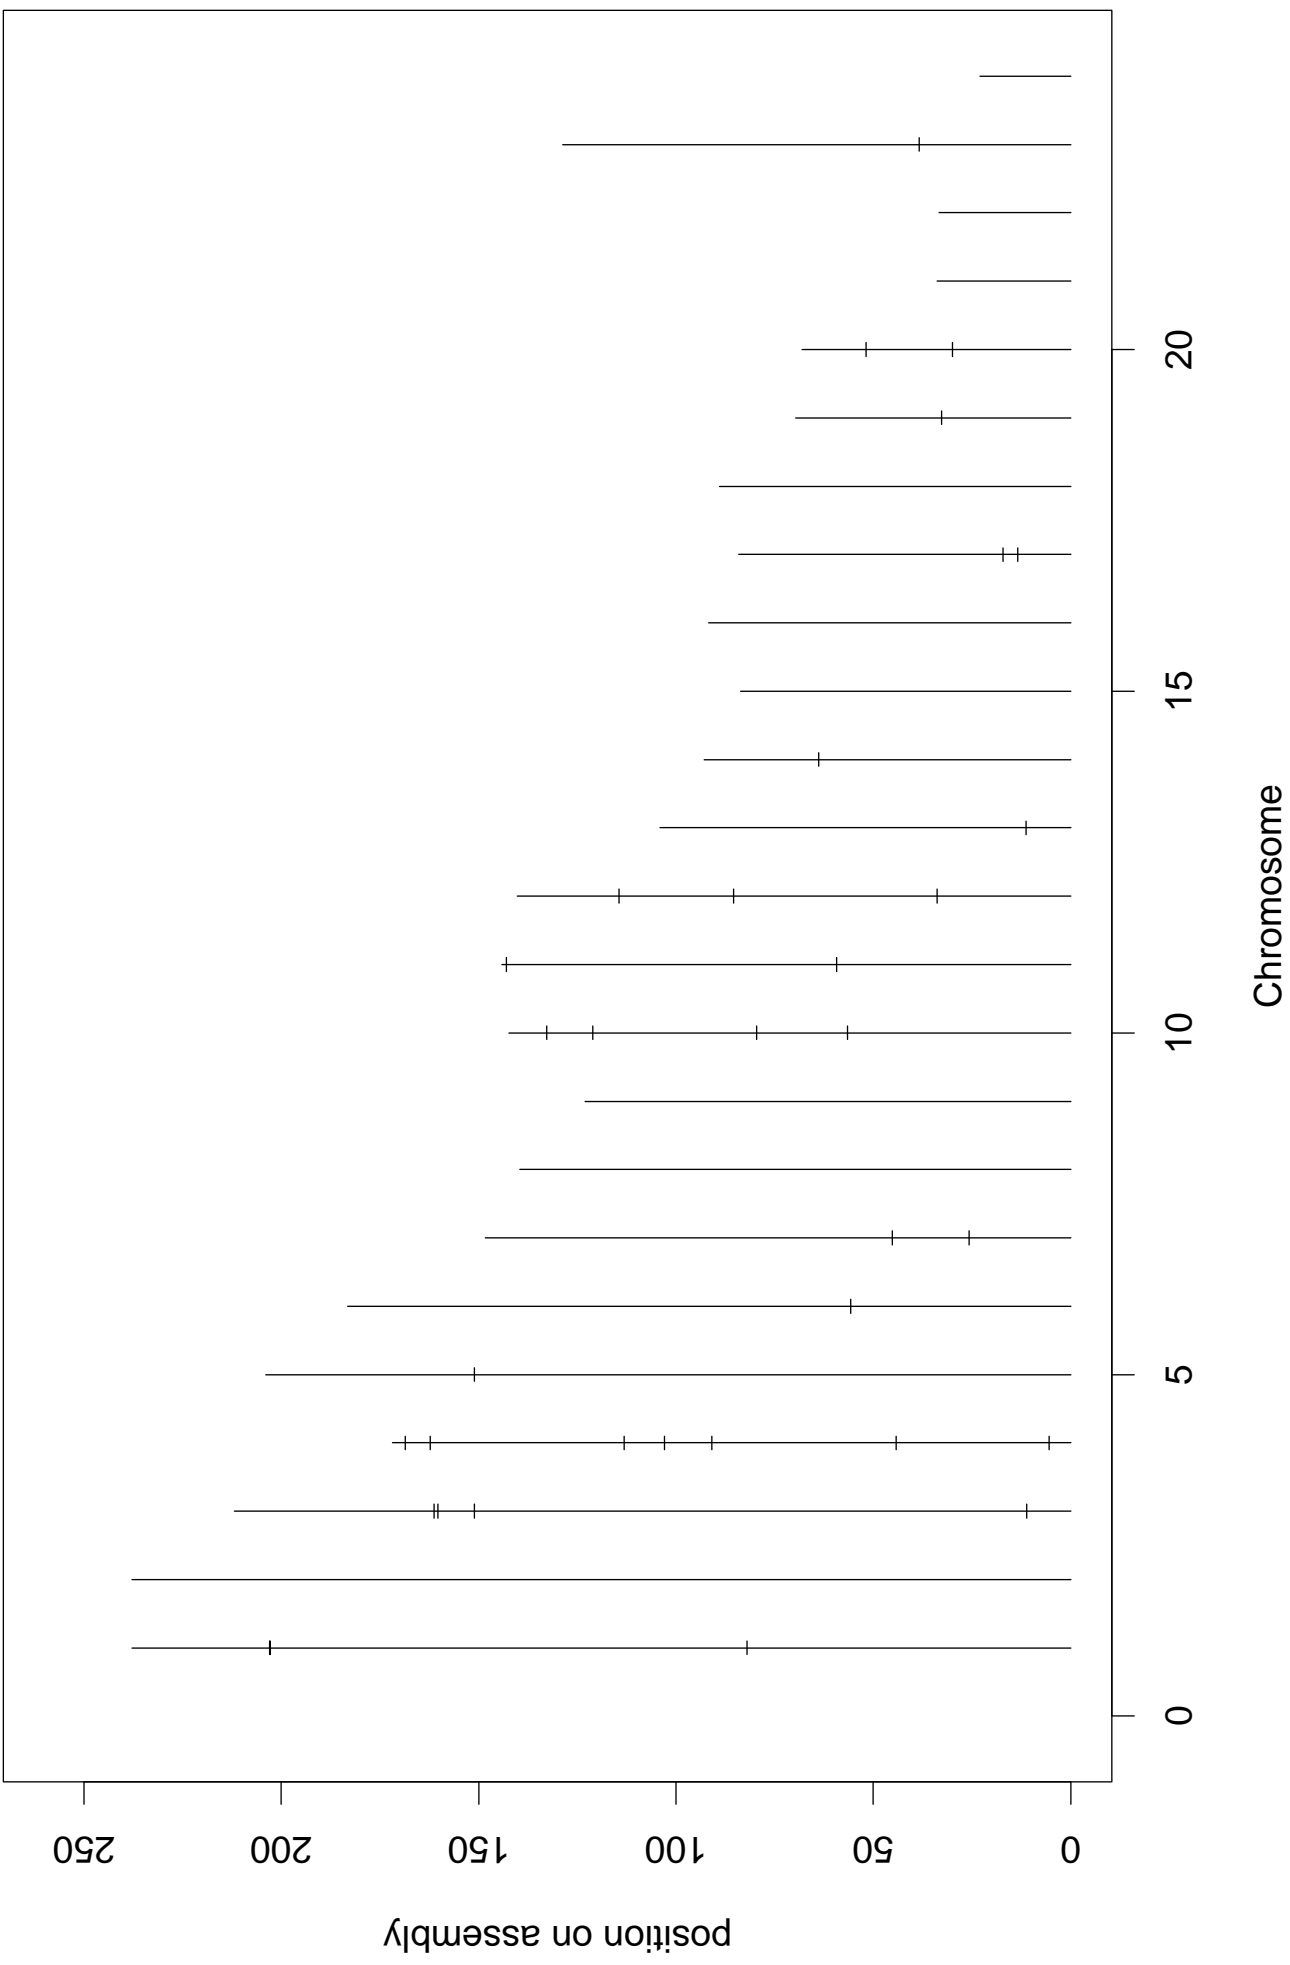

# sclerosis

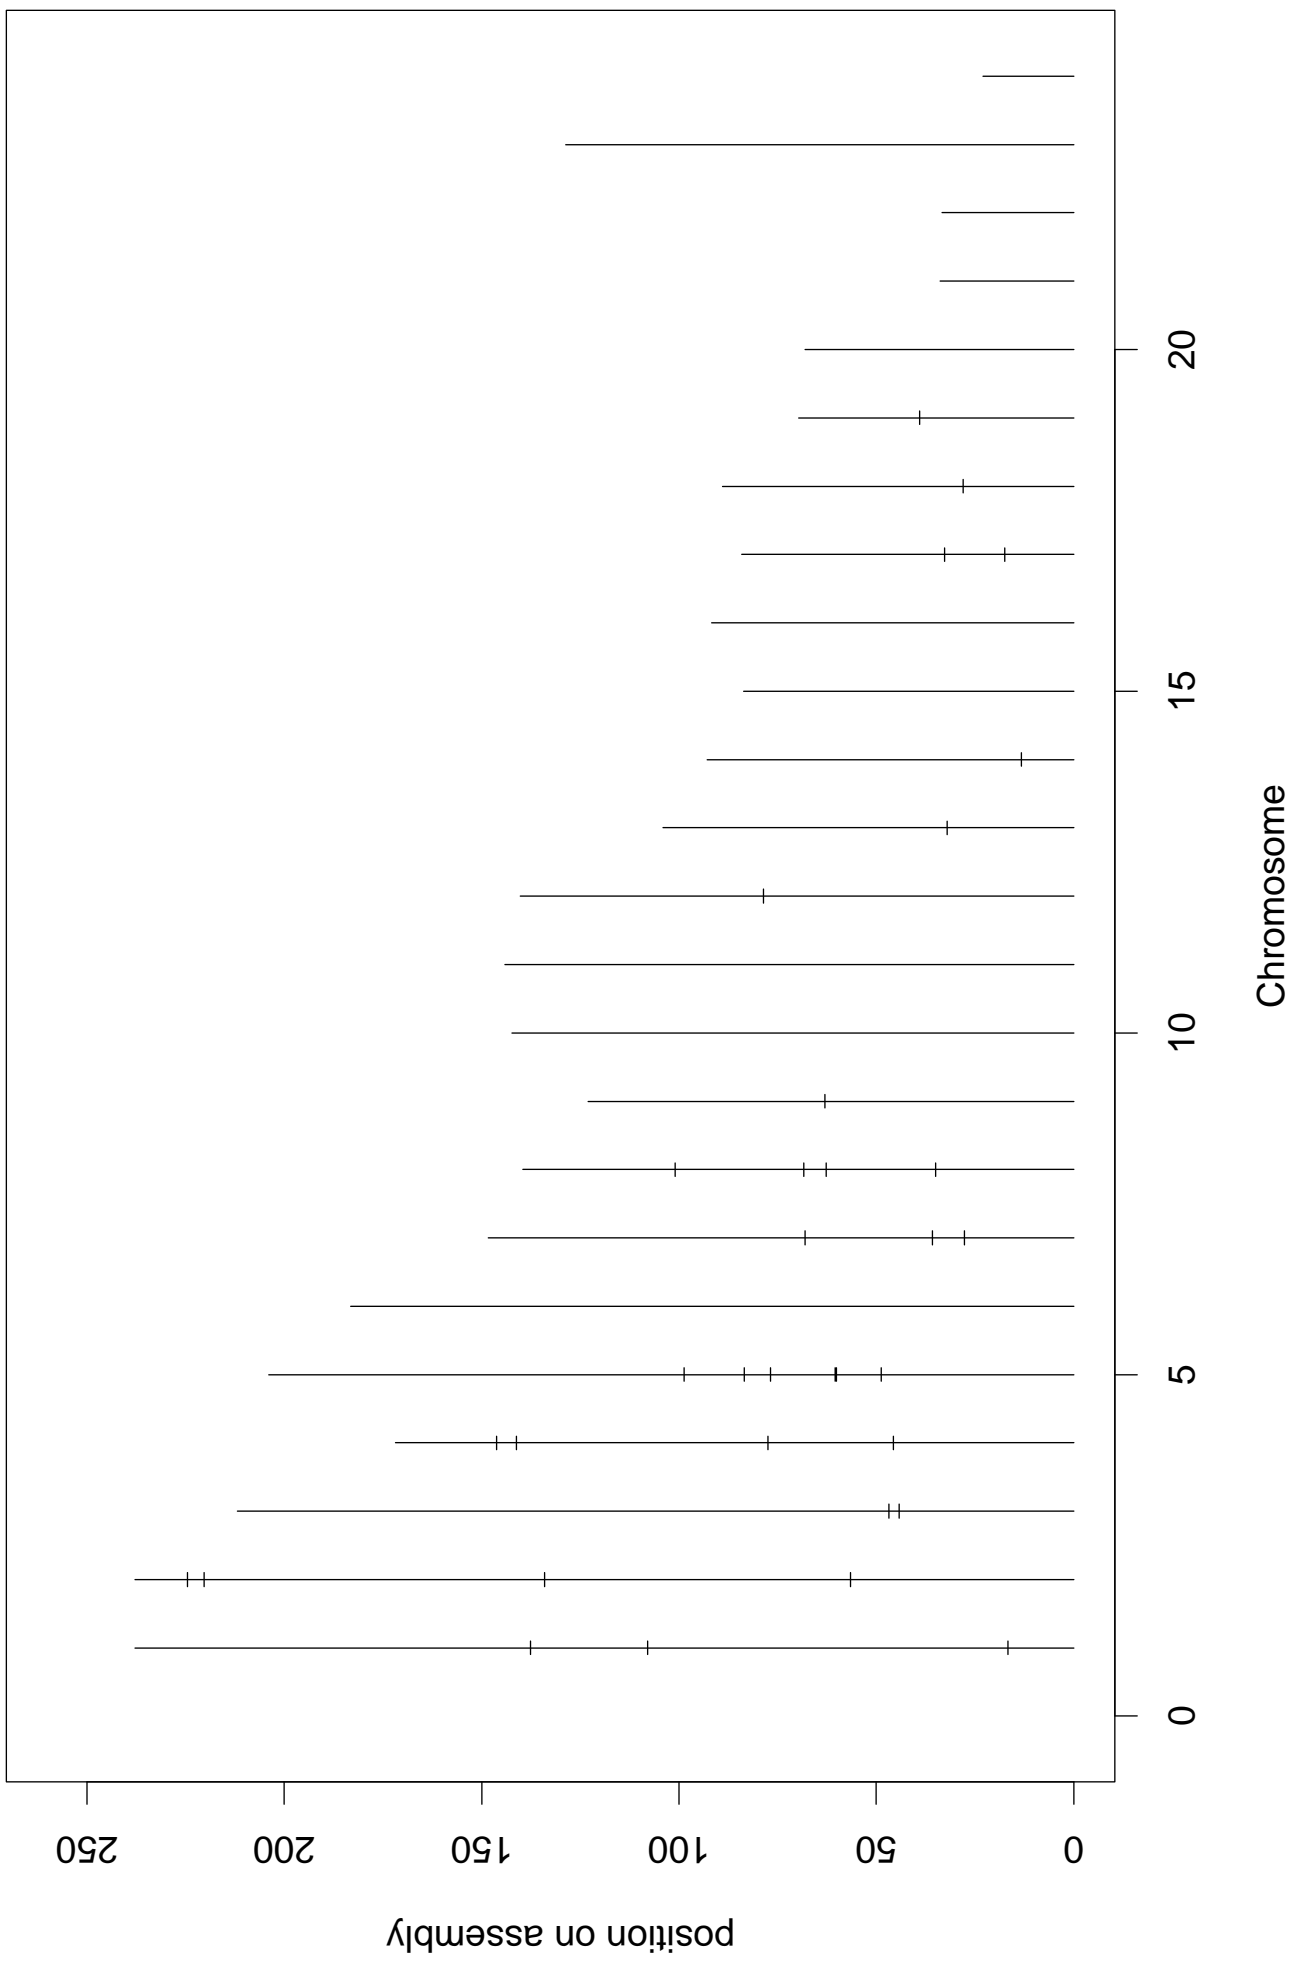

uterus

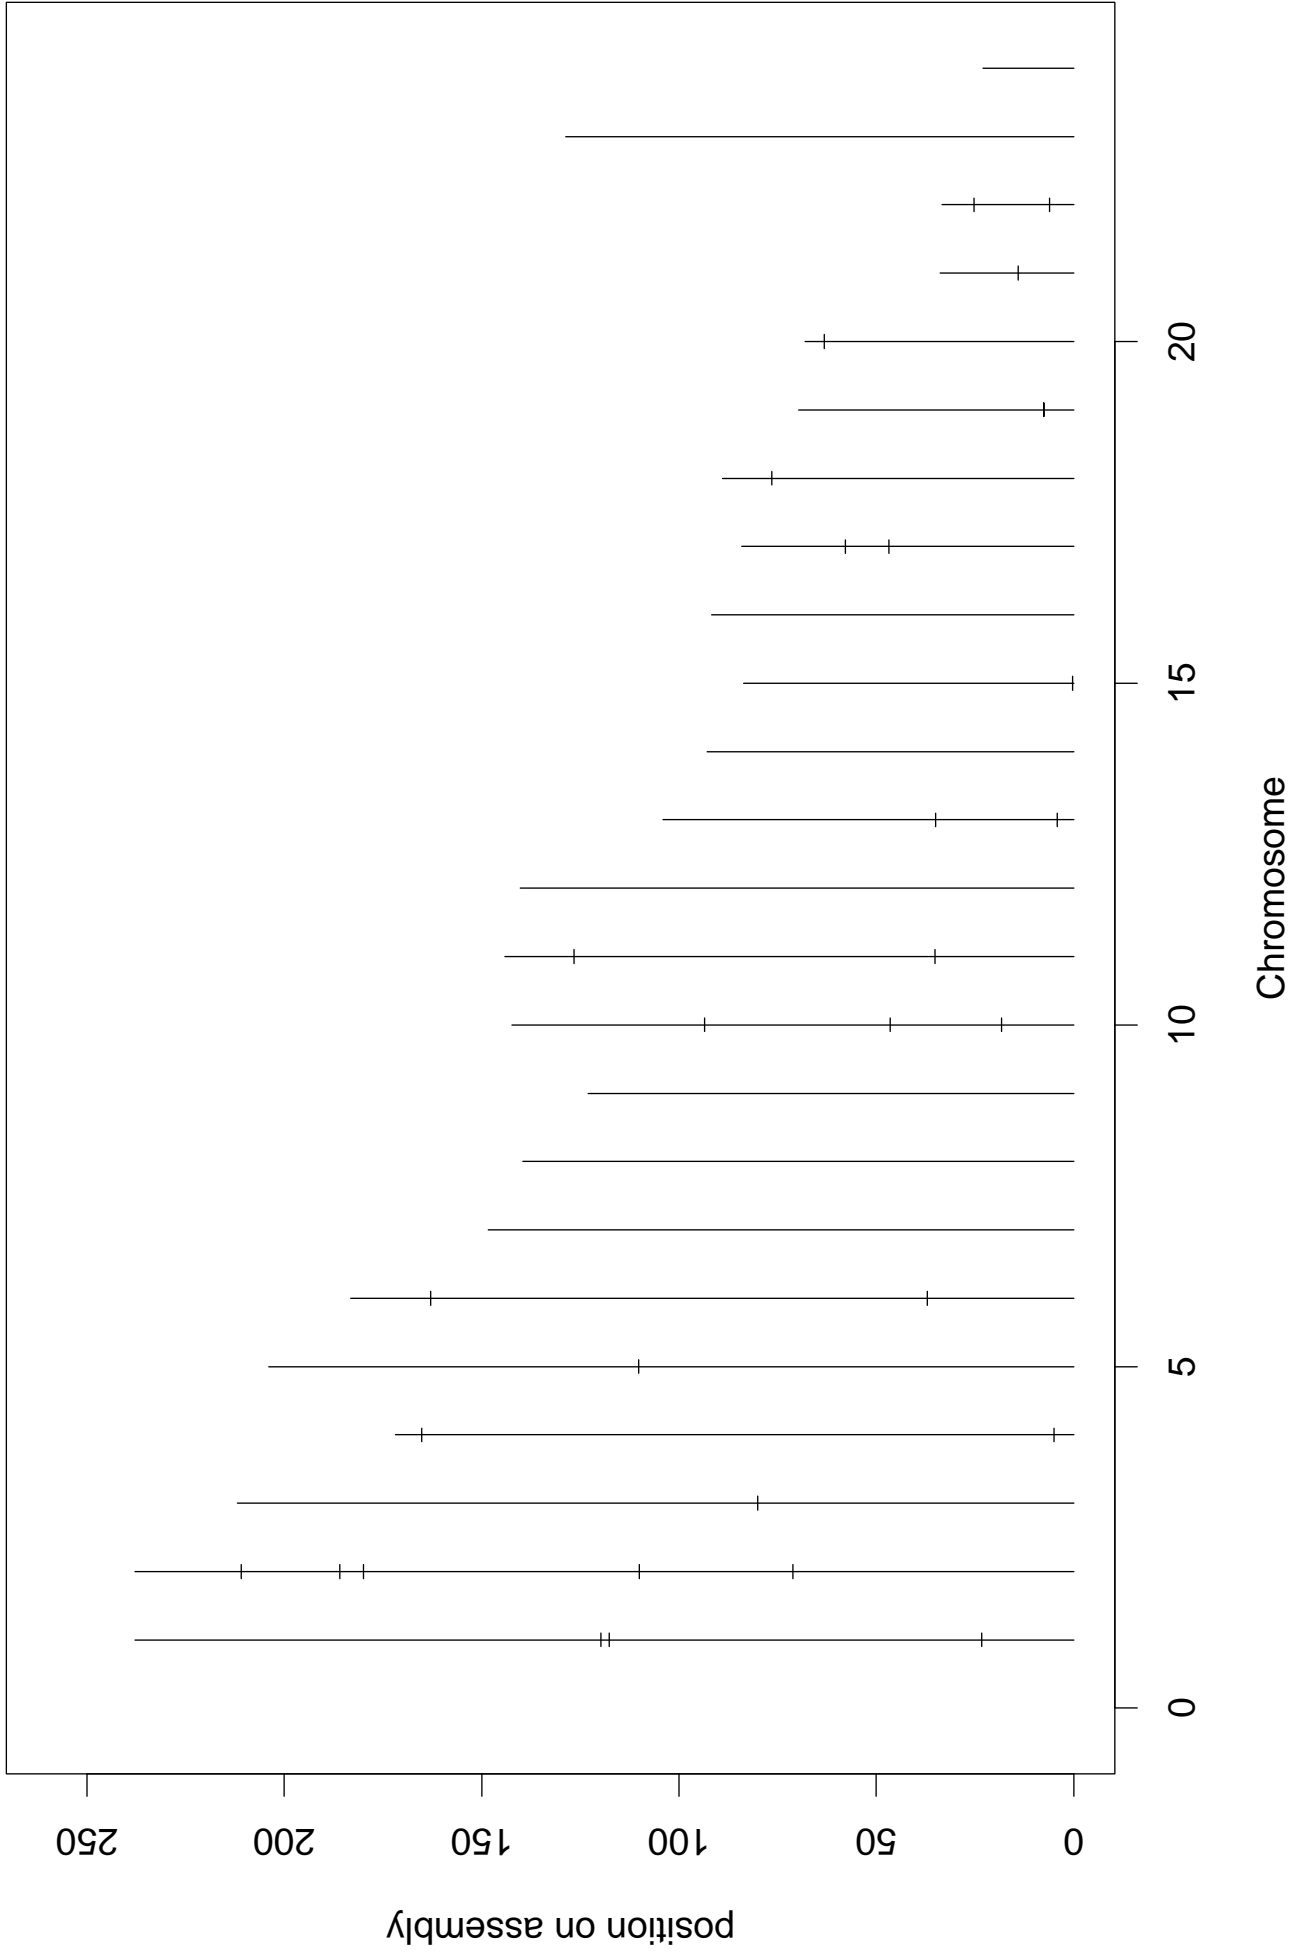

# aorta

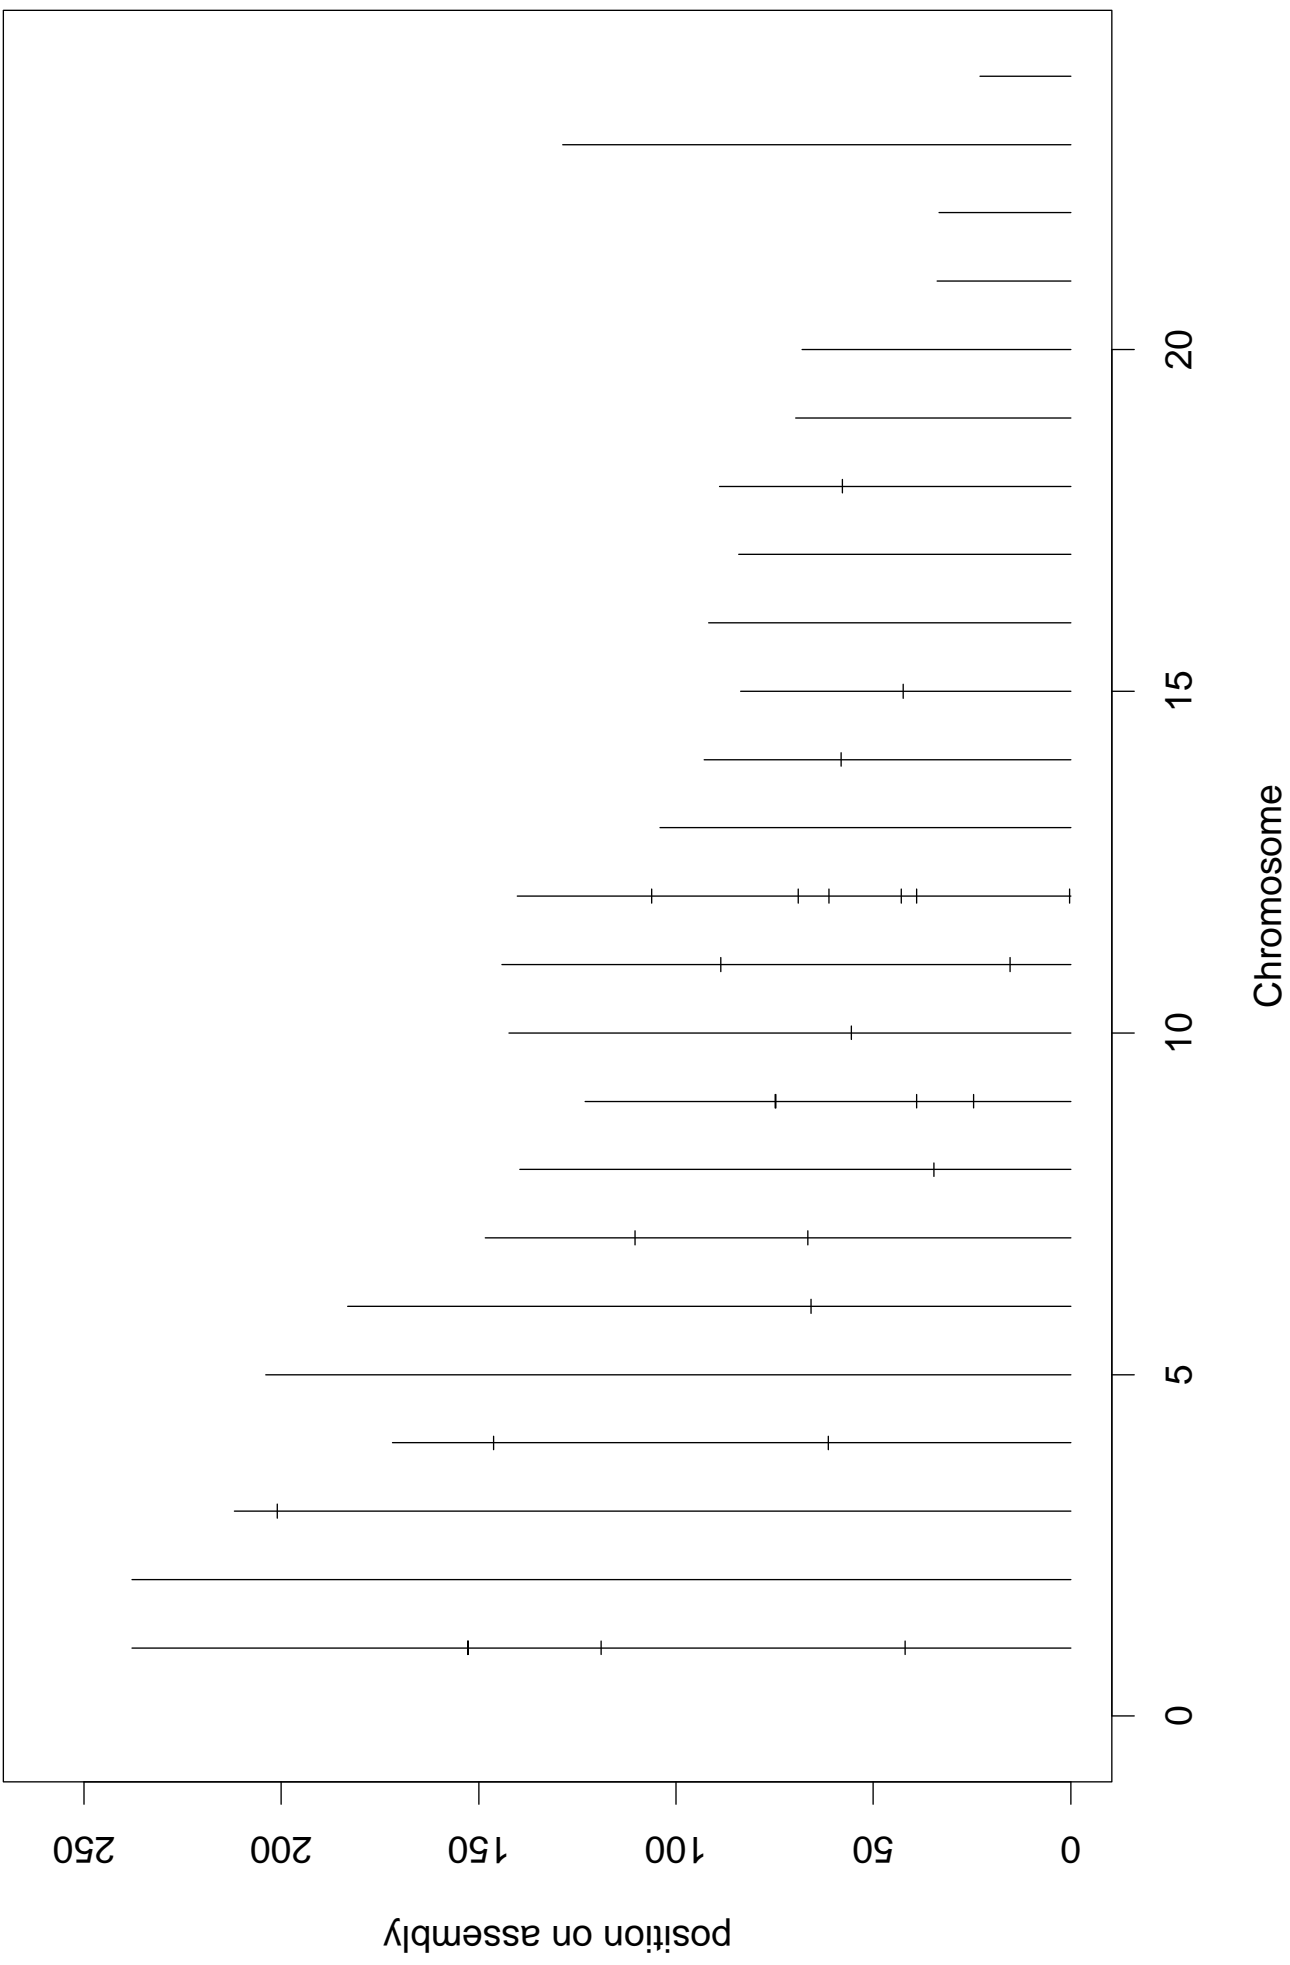

# tongue

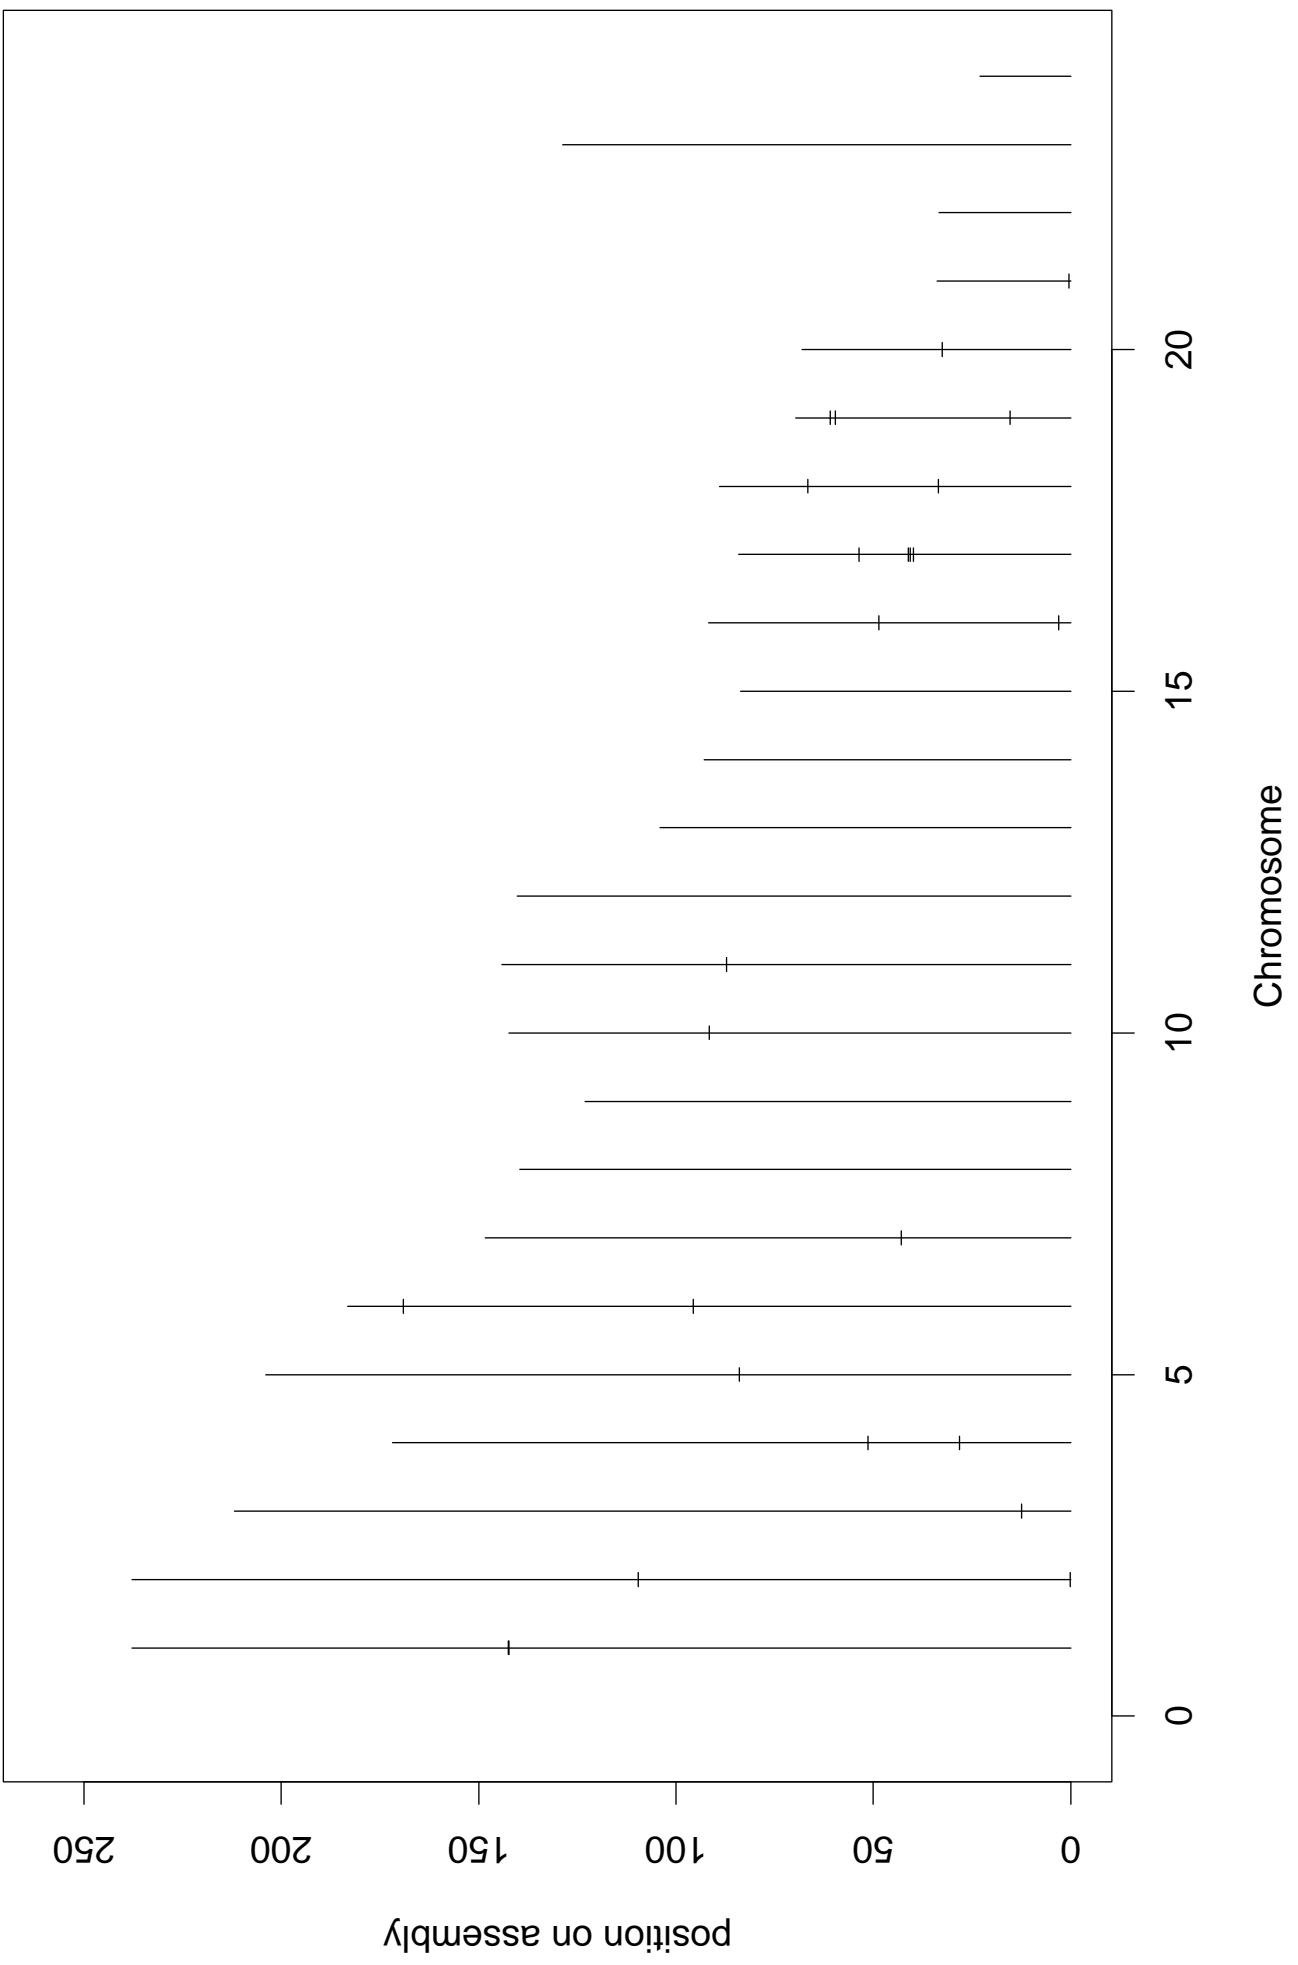

eye

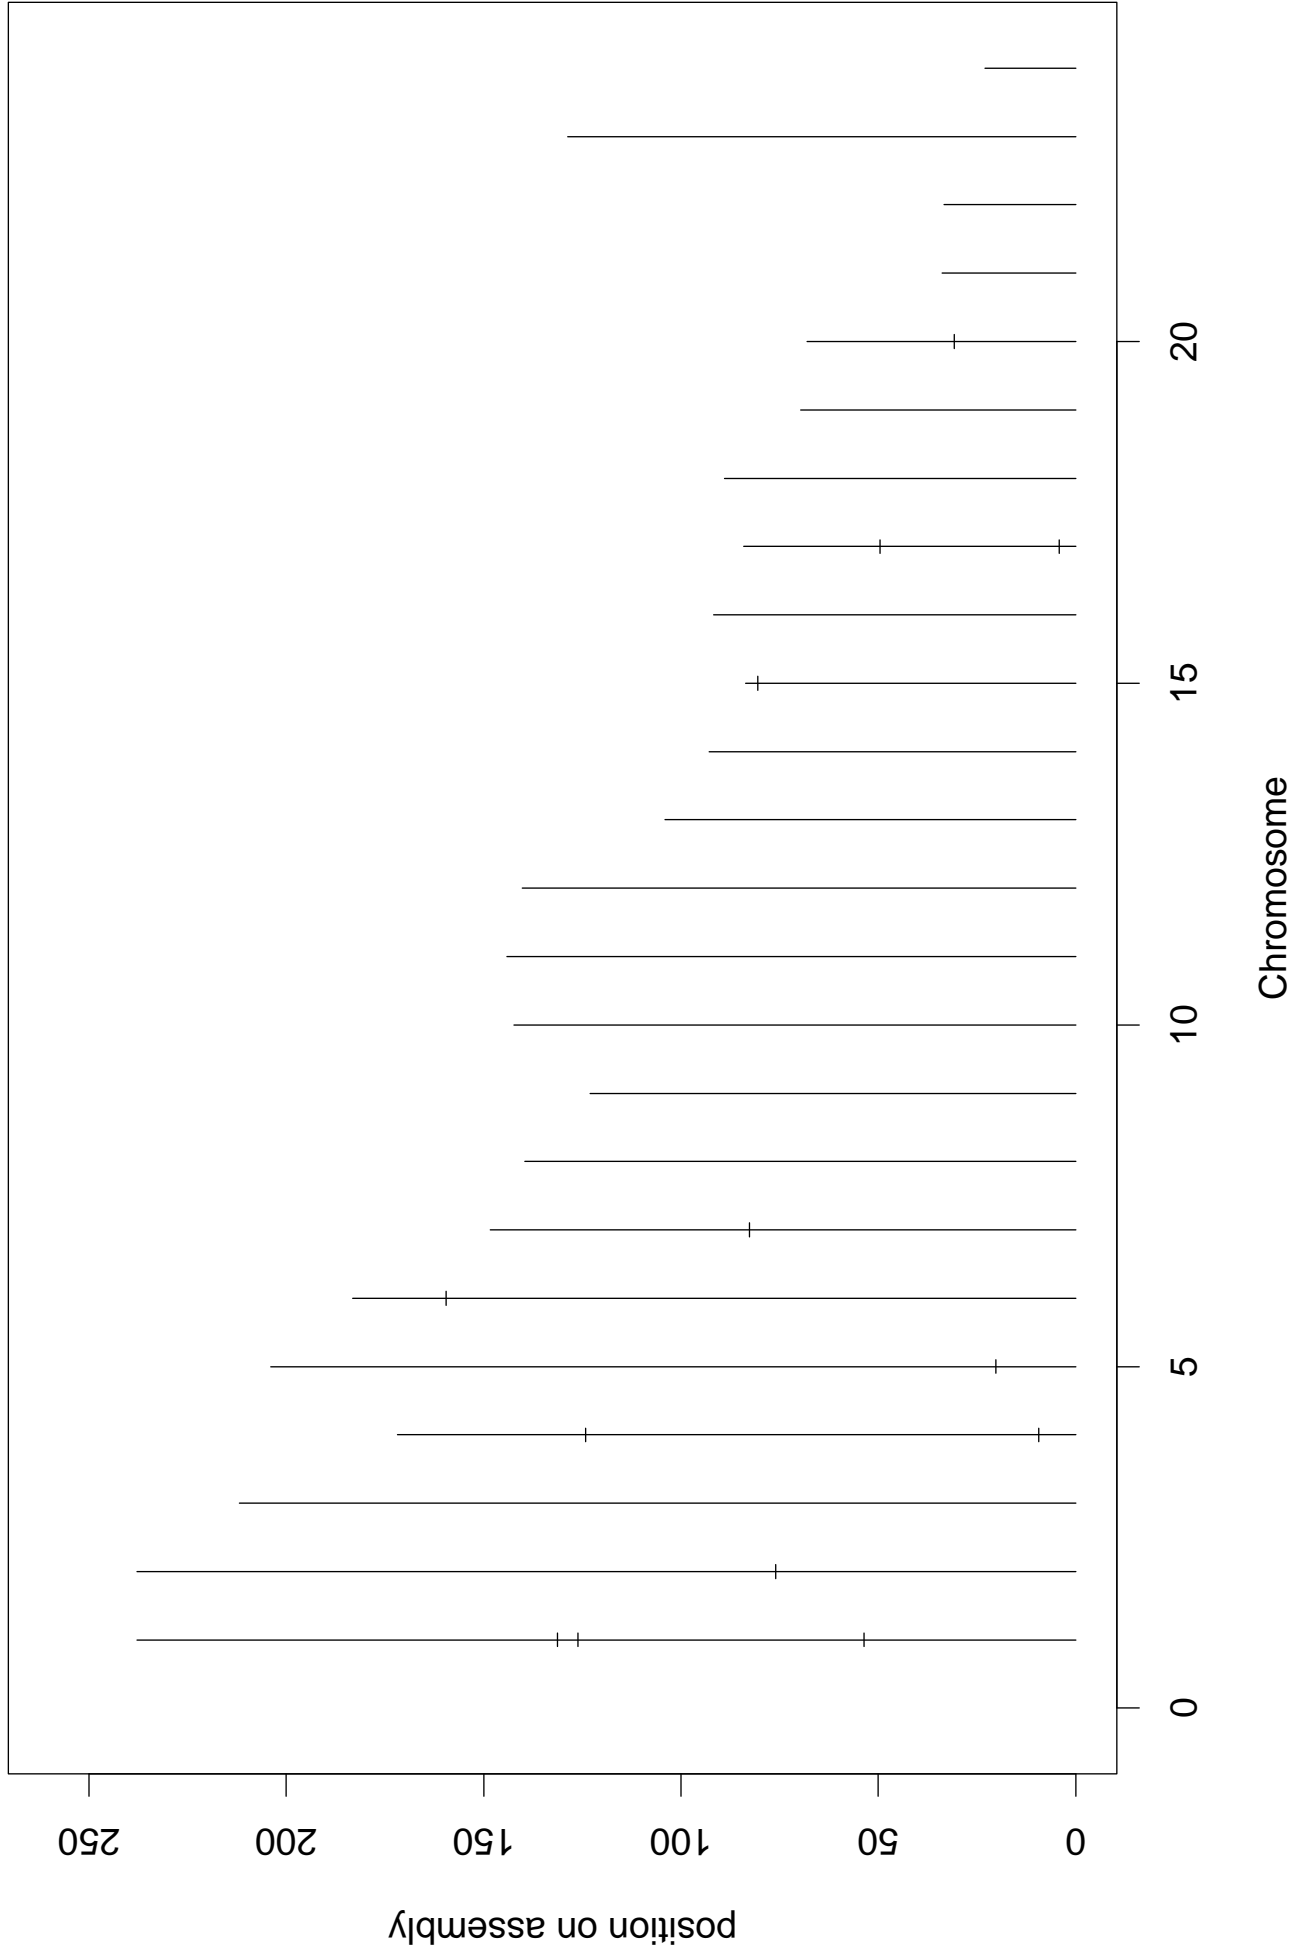

# bone

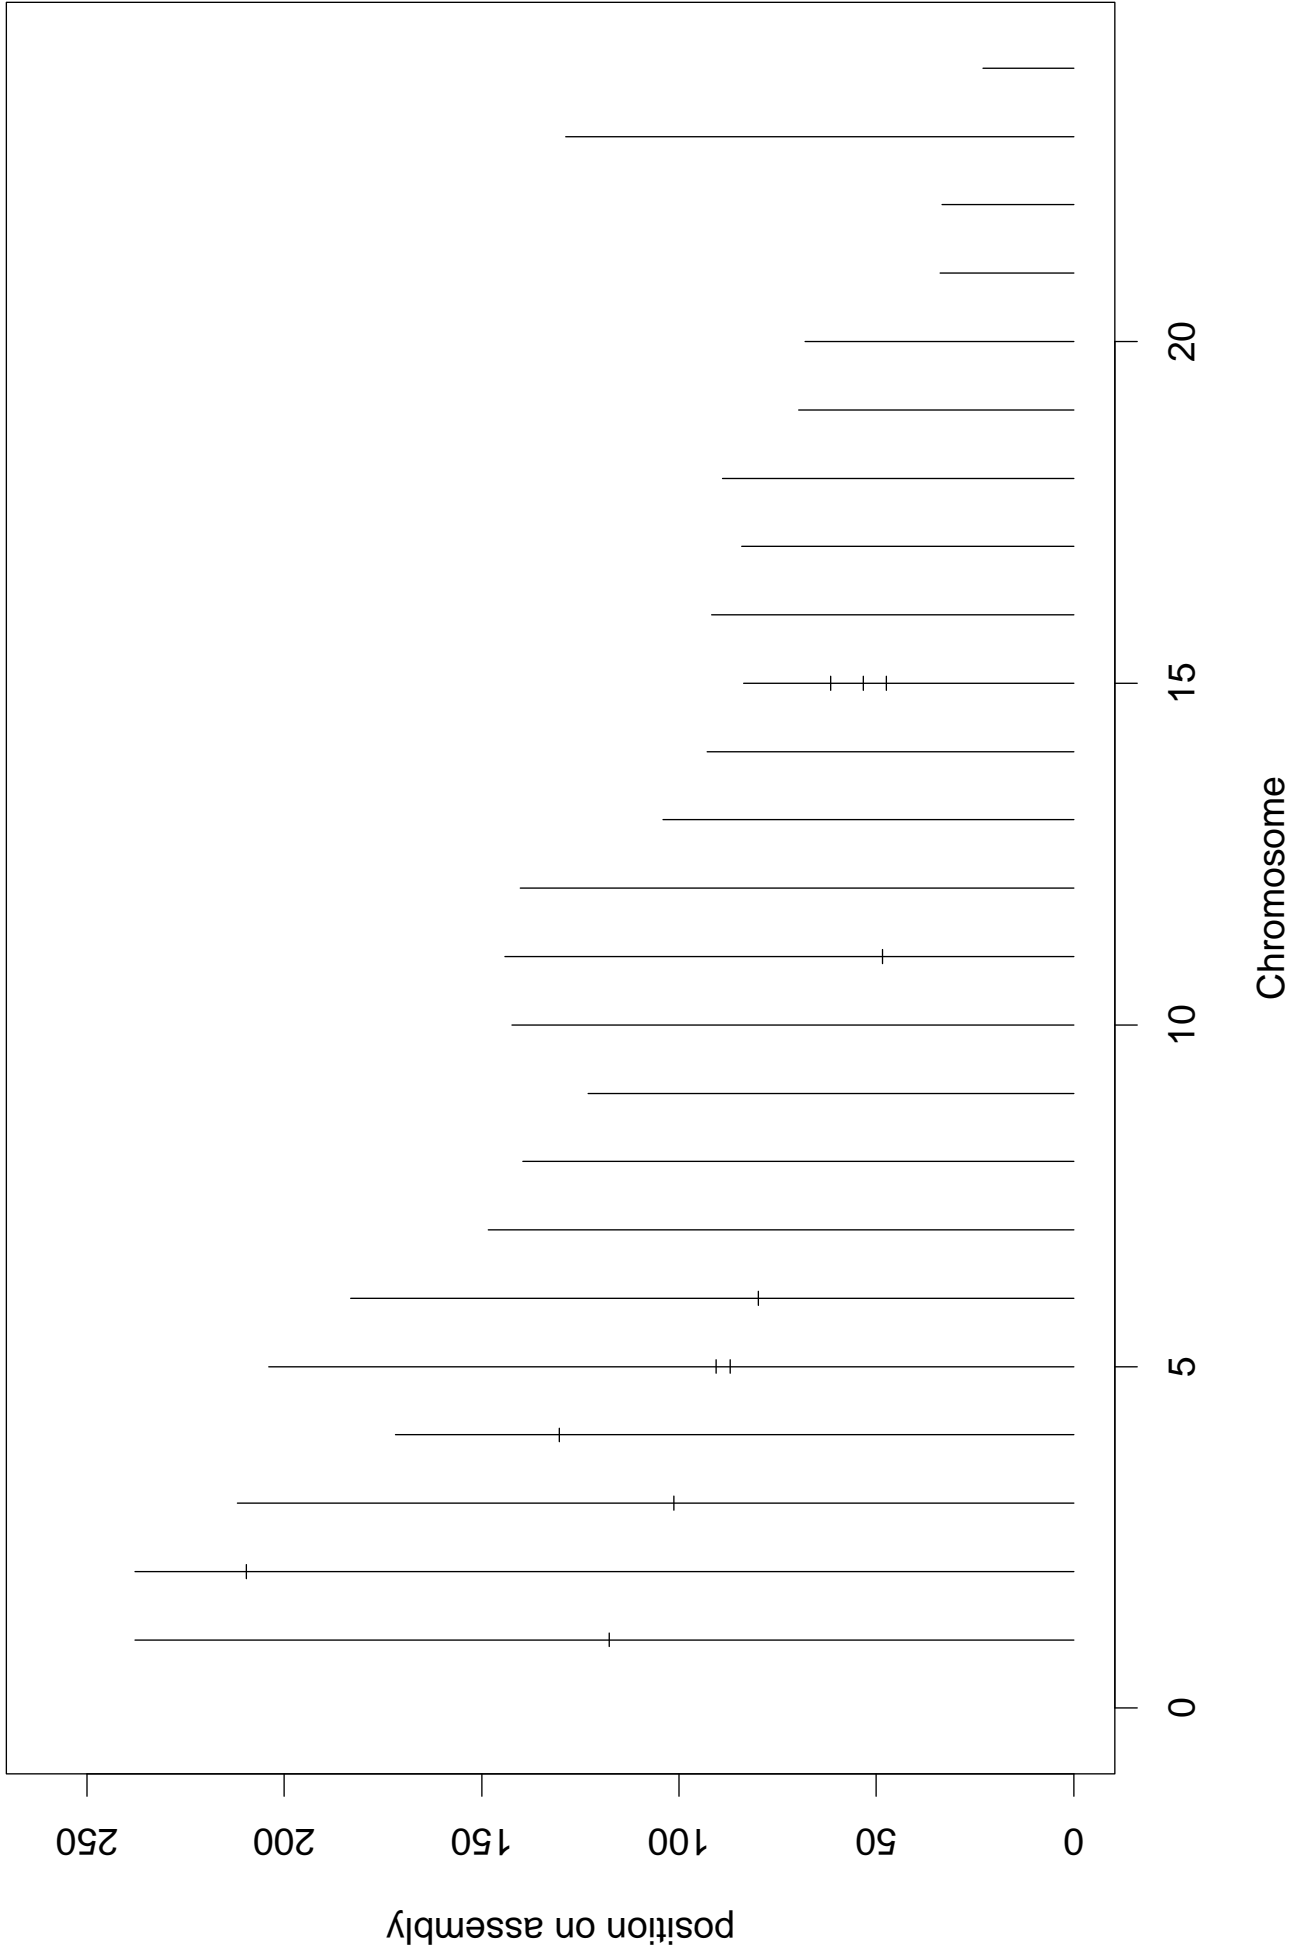



# marrow

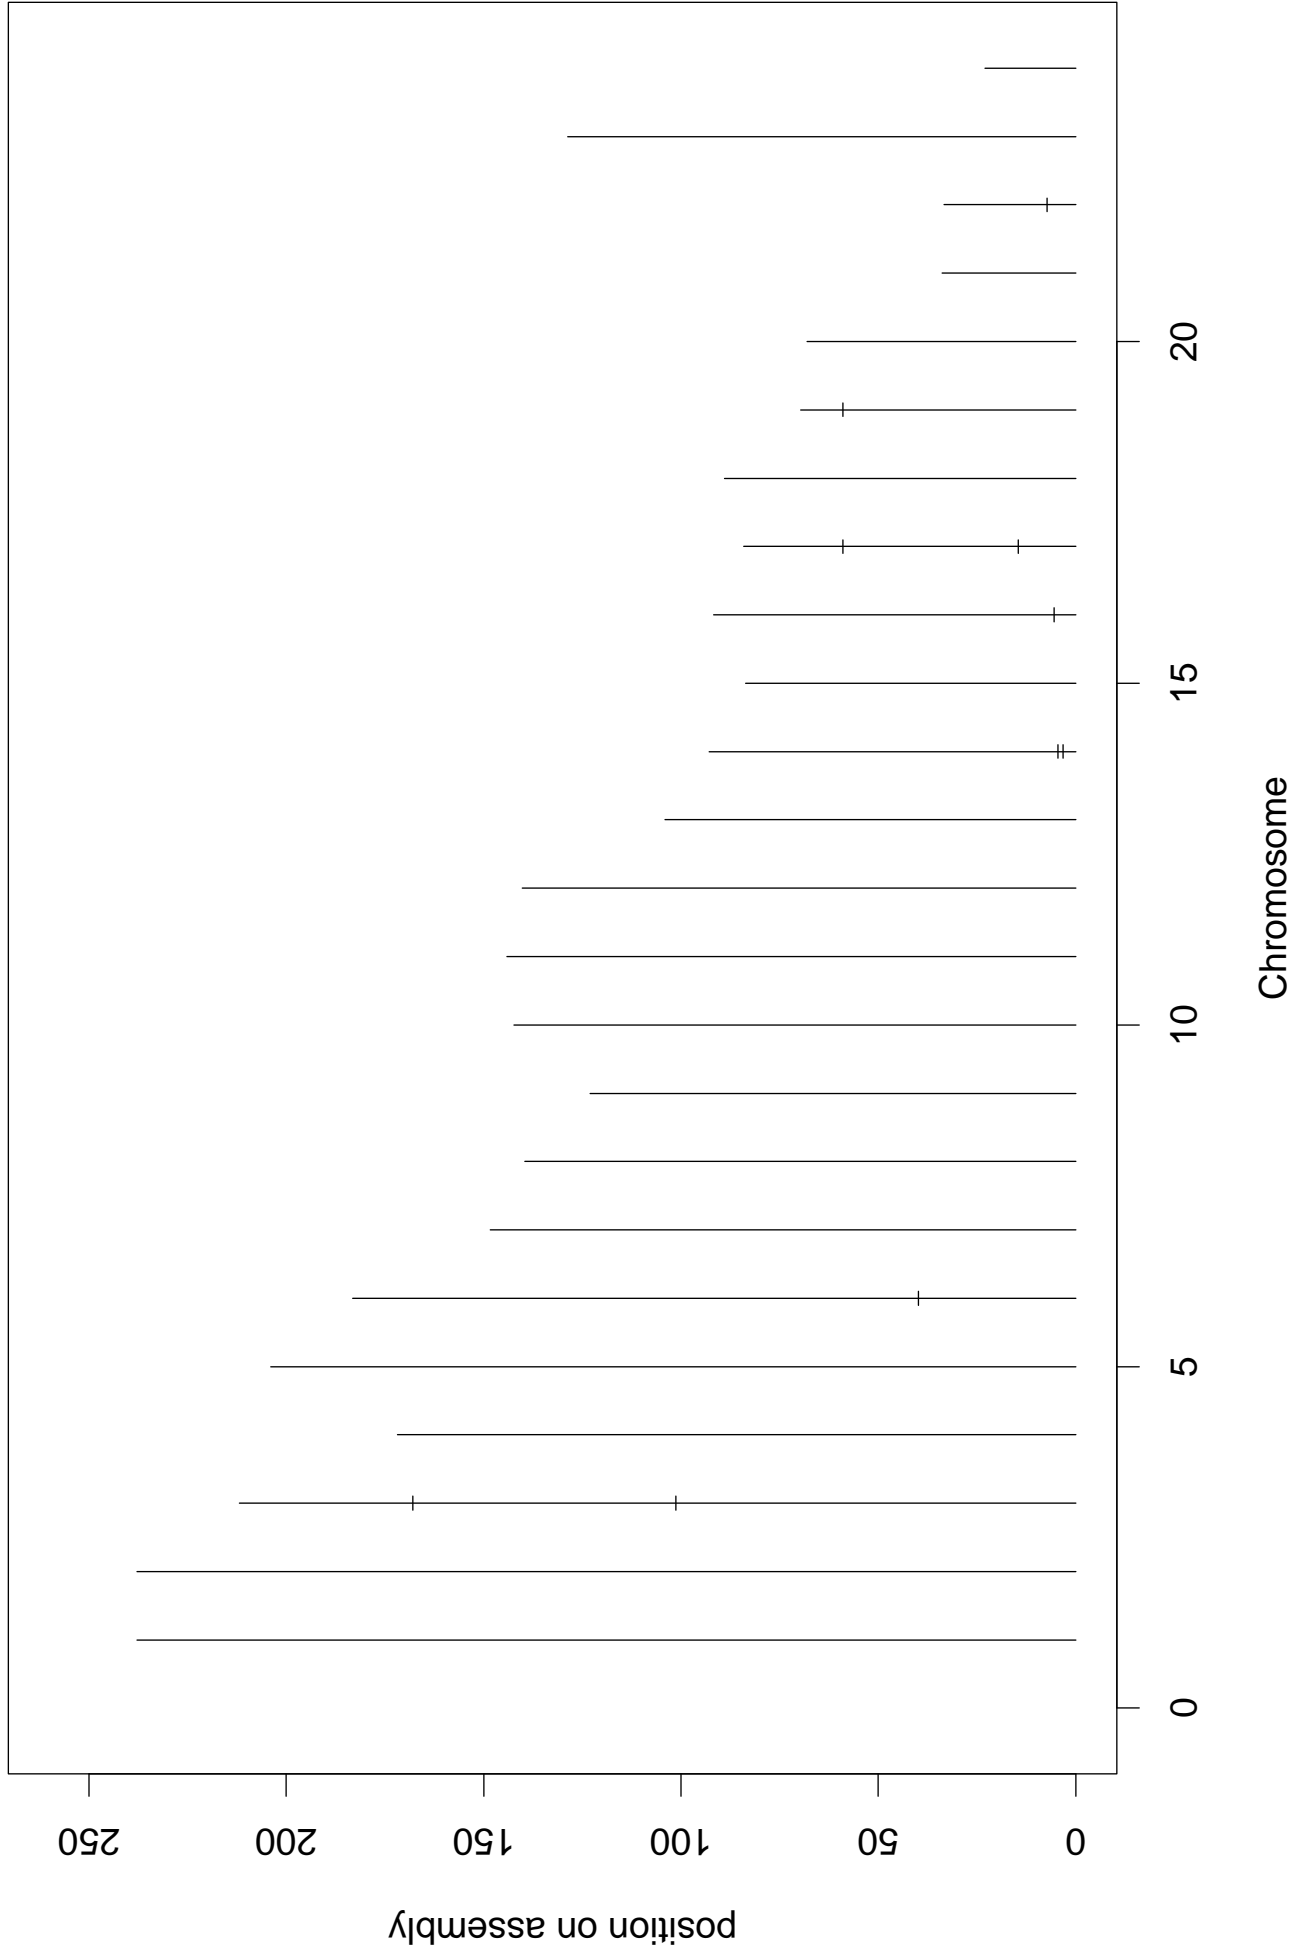

# pineal gland

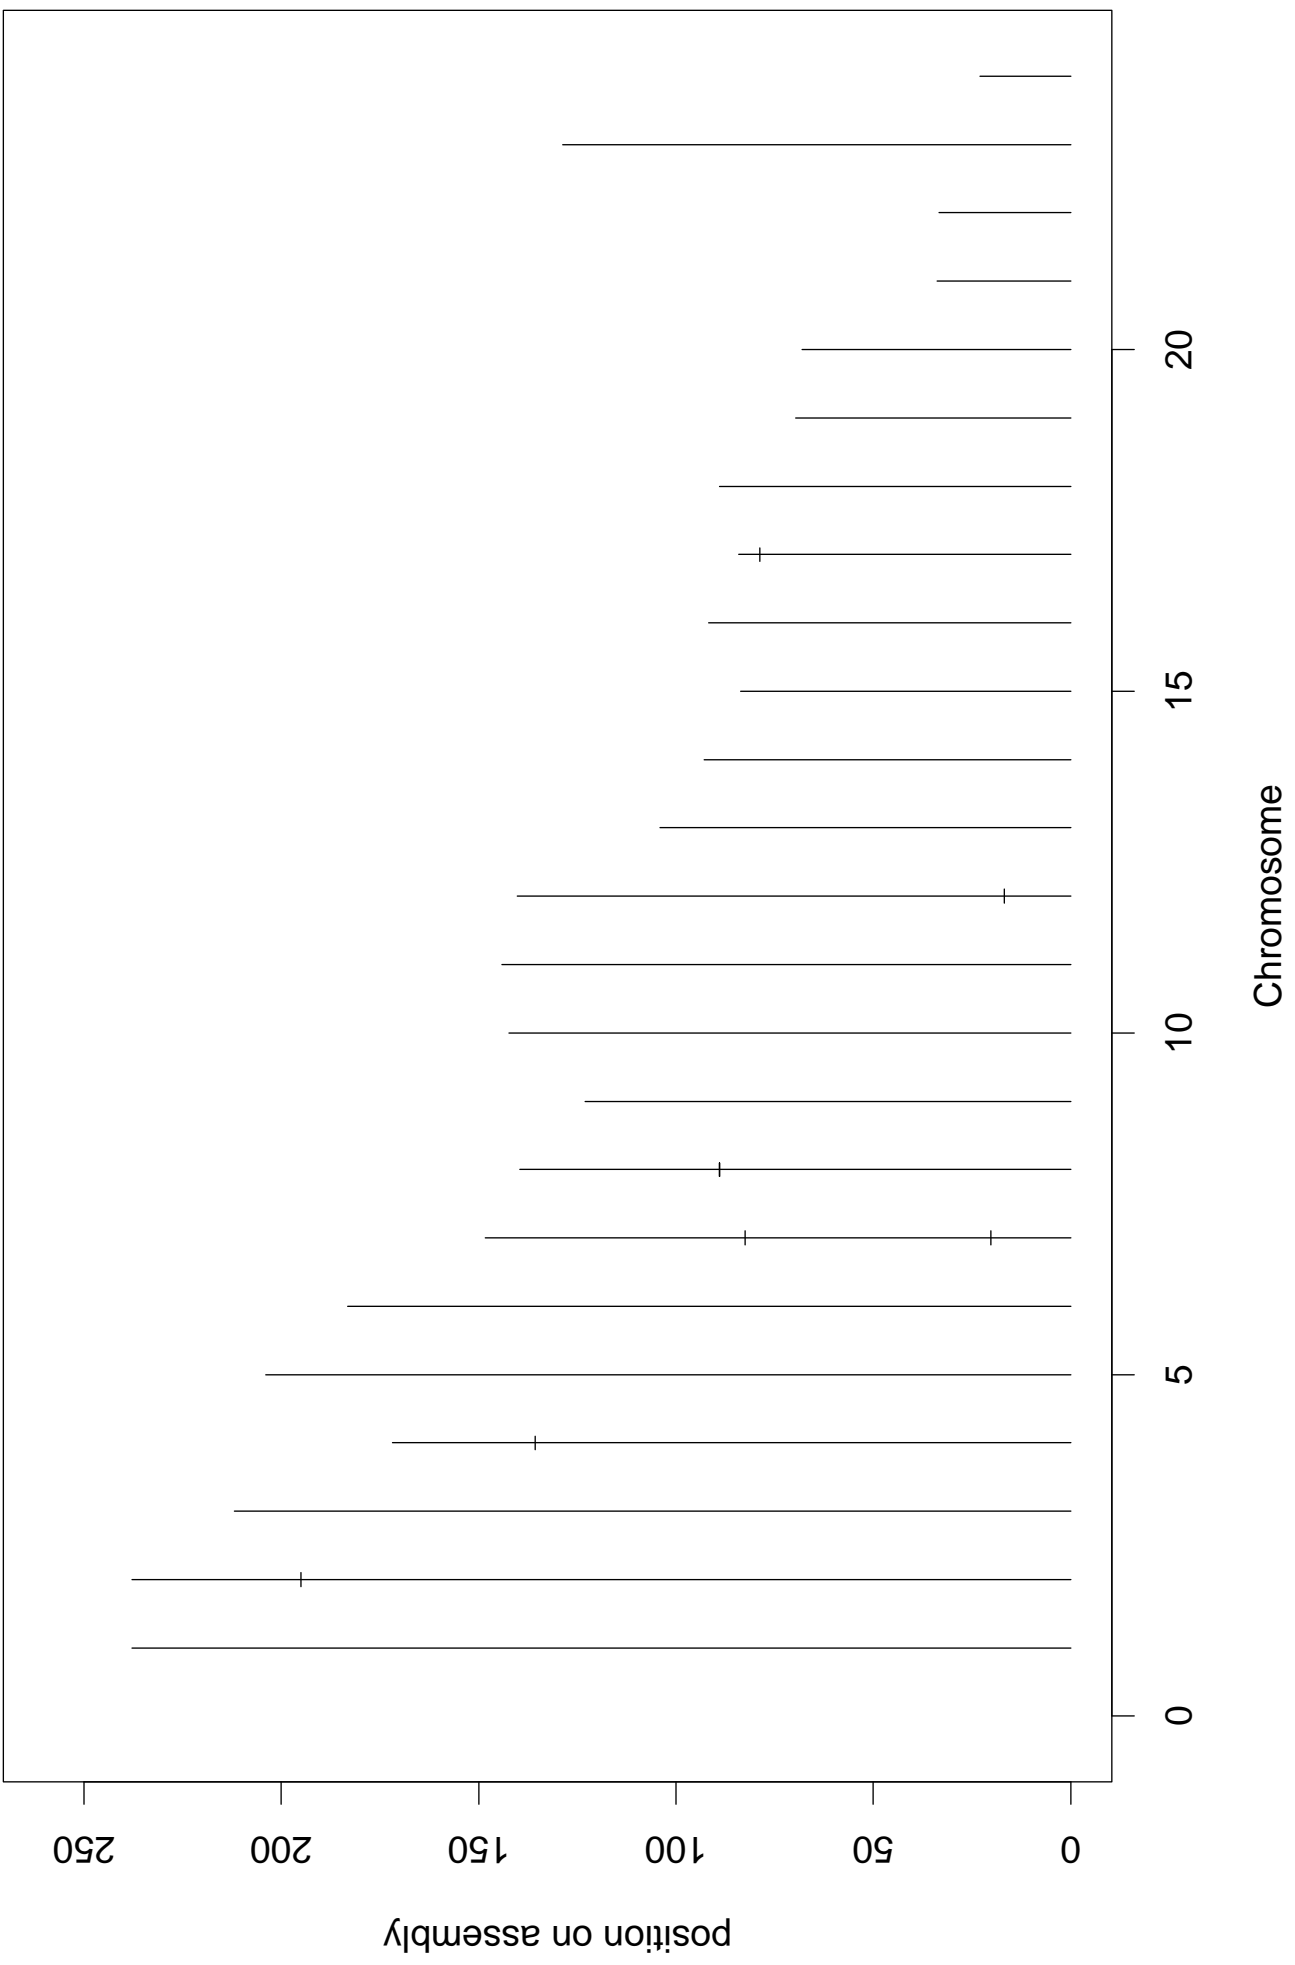

# cervix

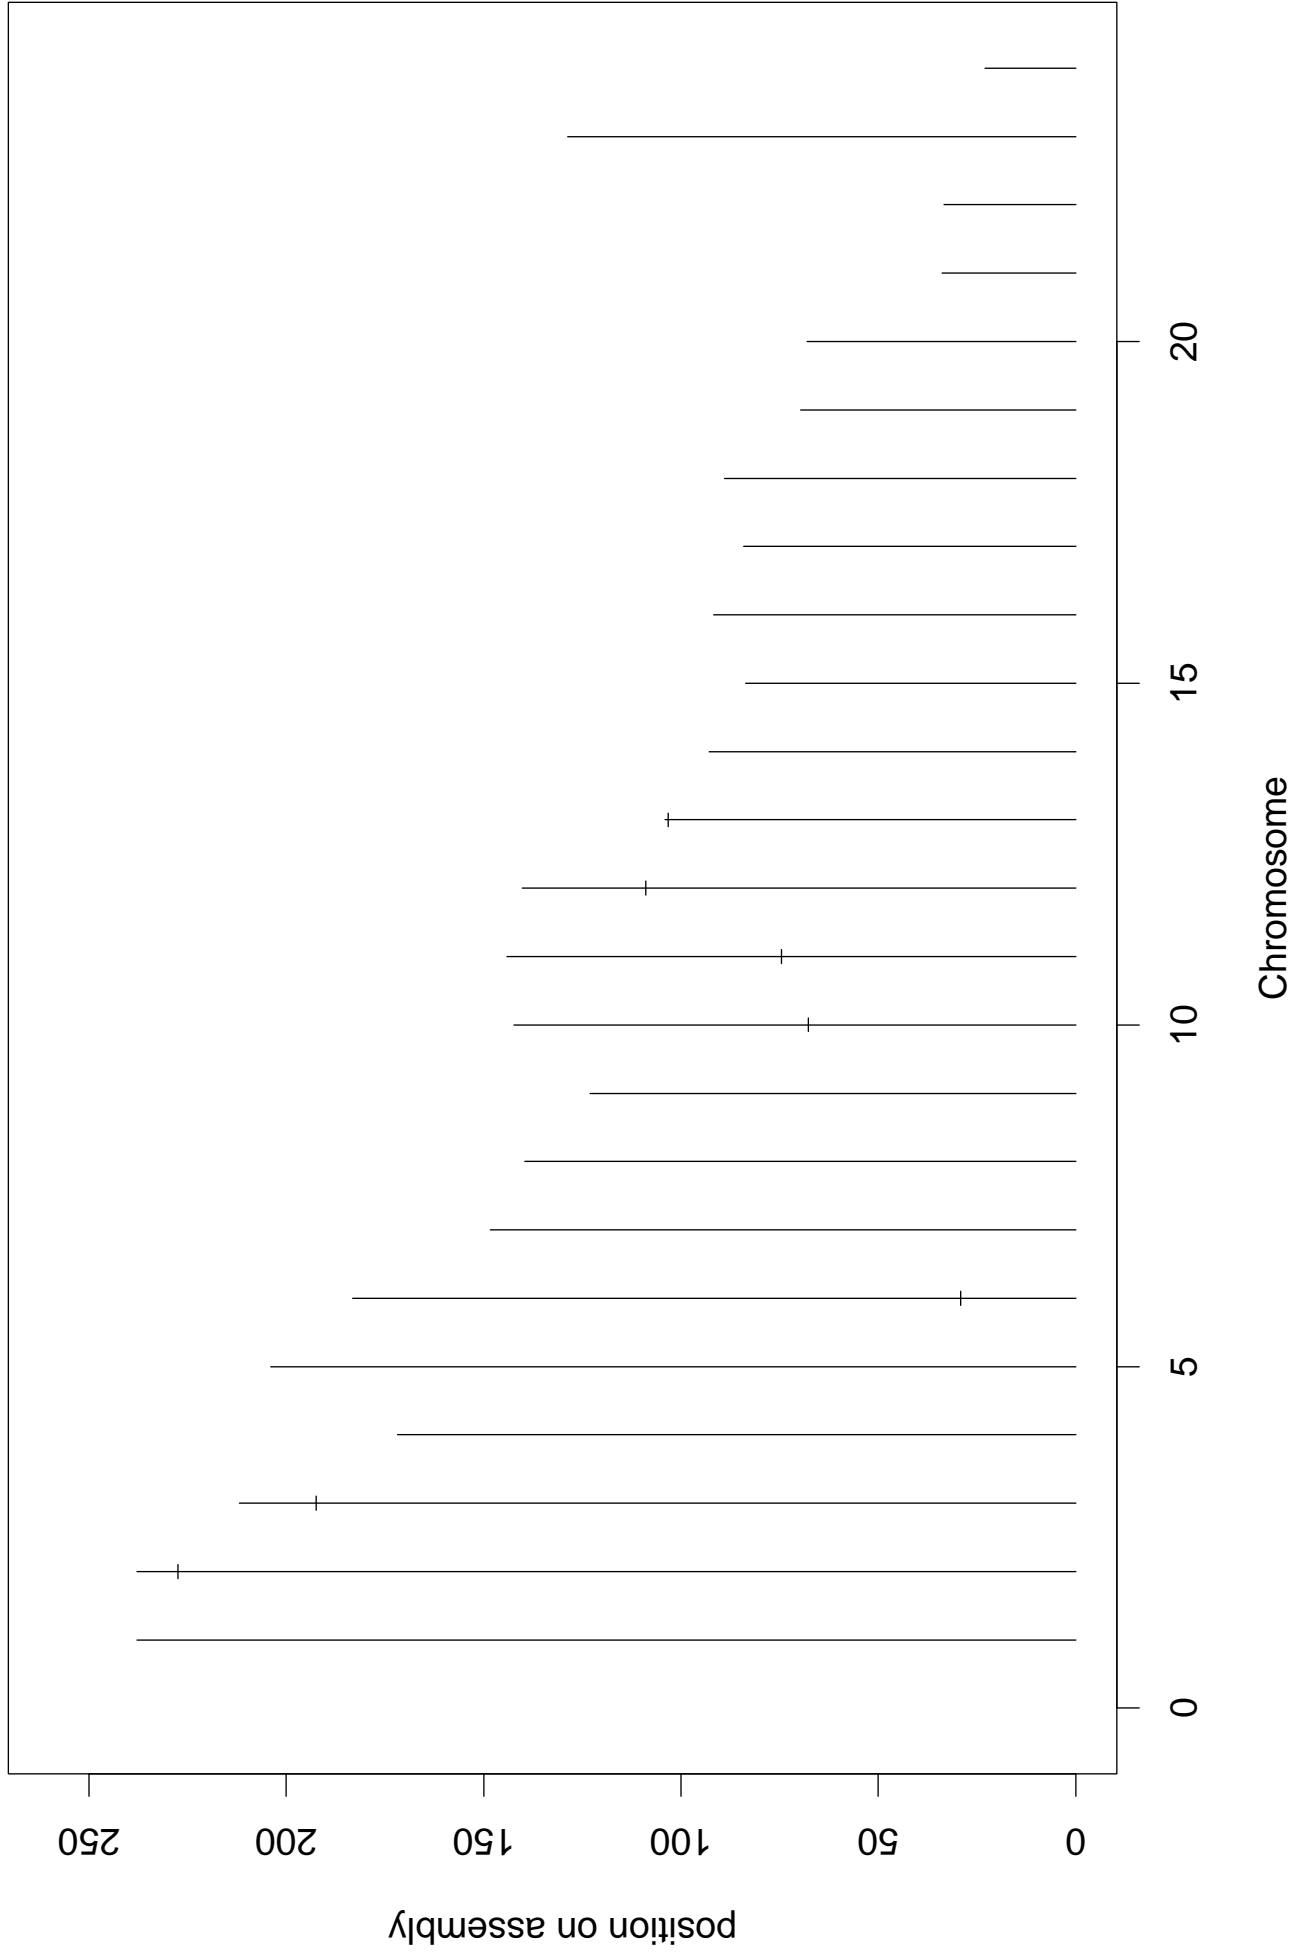

# salivary gland

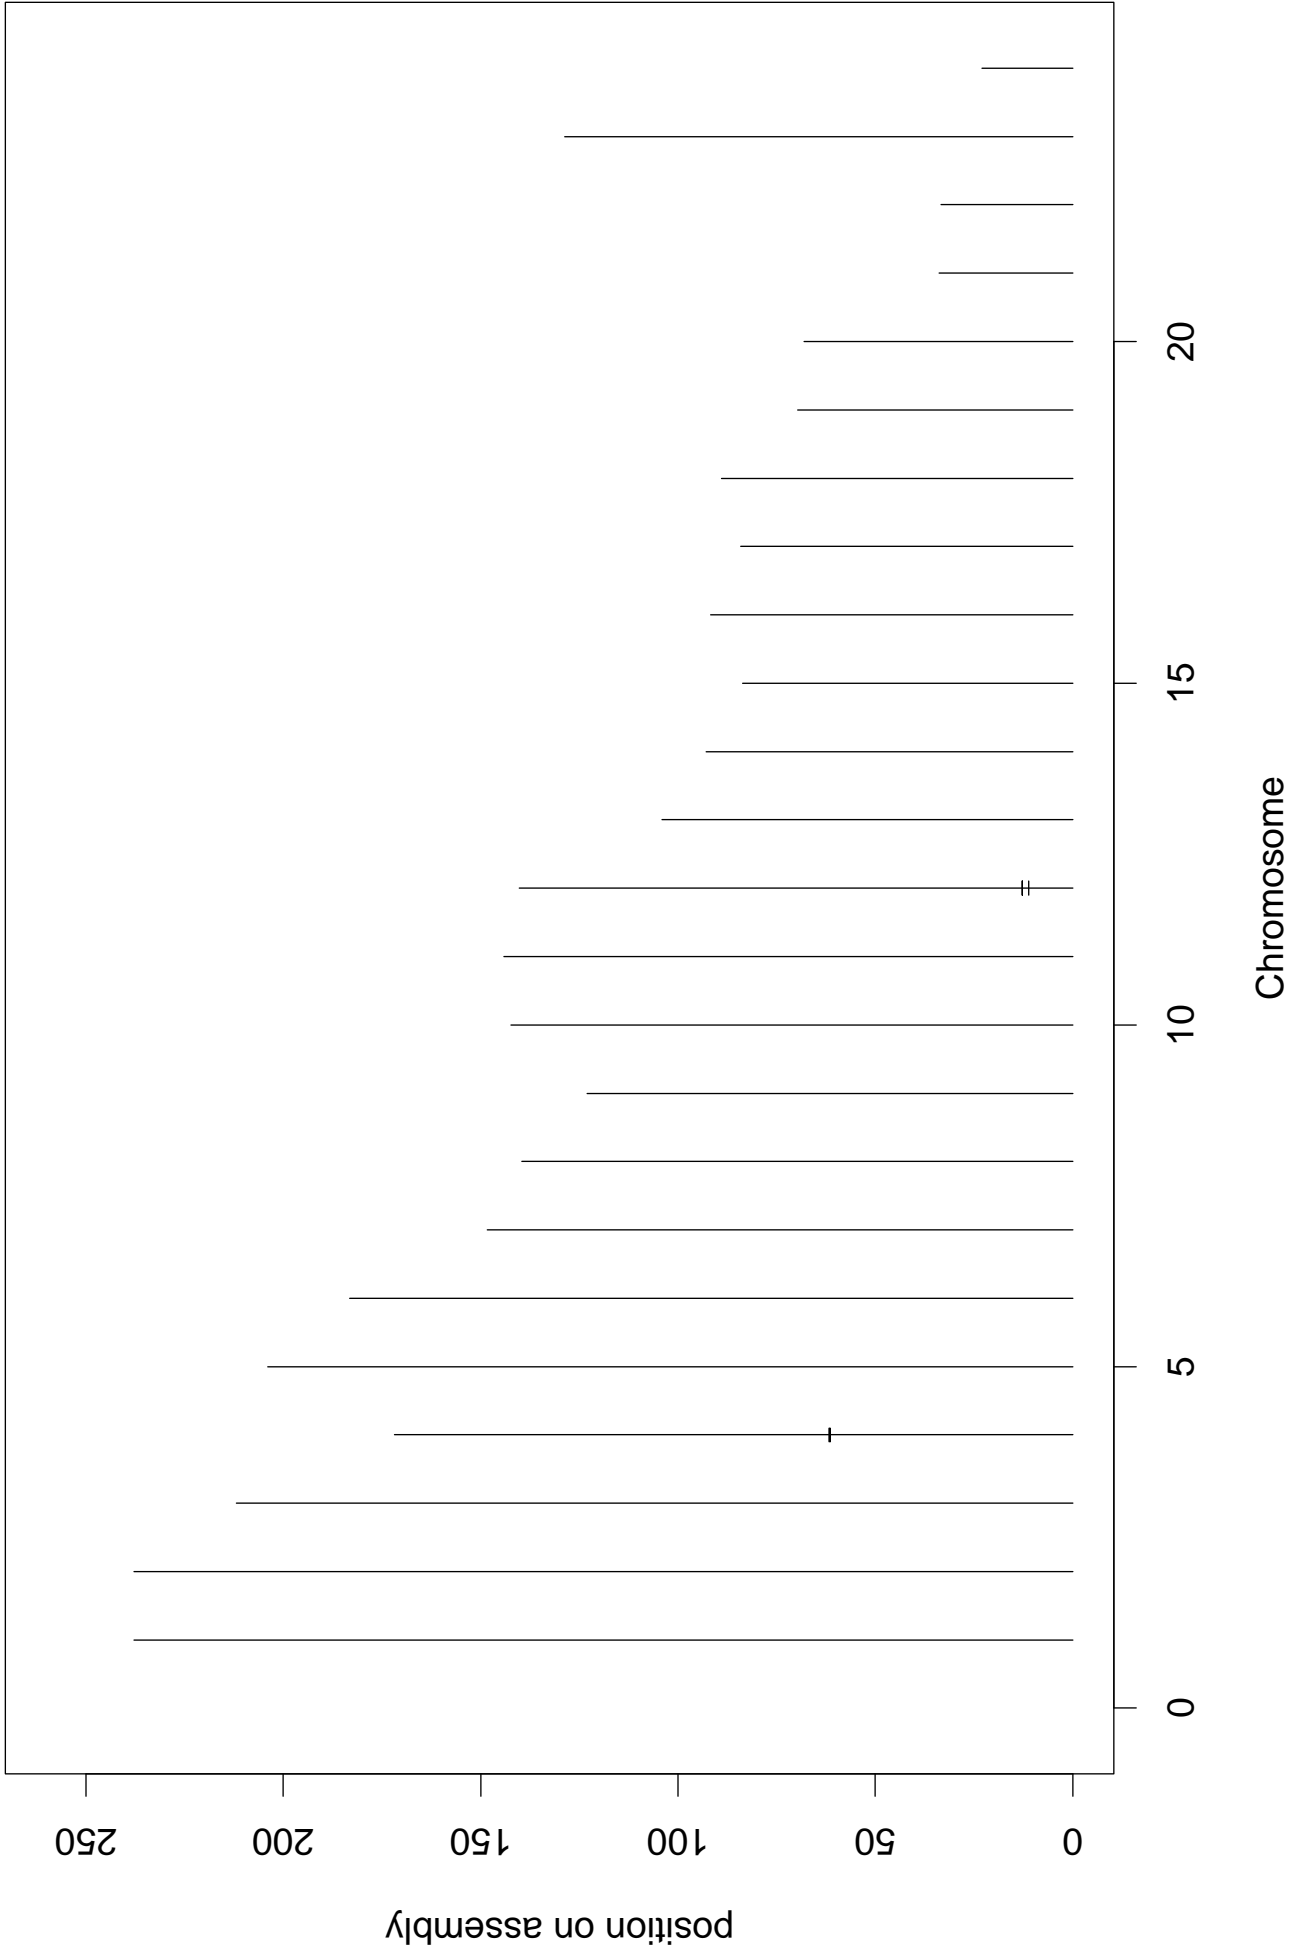

# olfactory epithelium

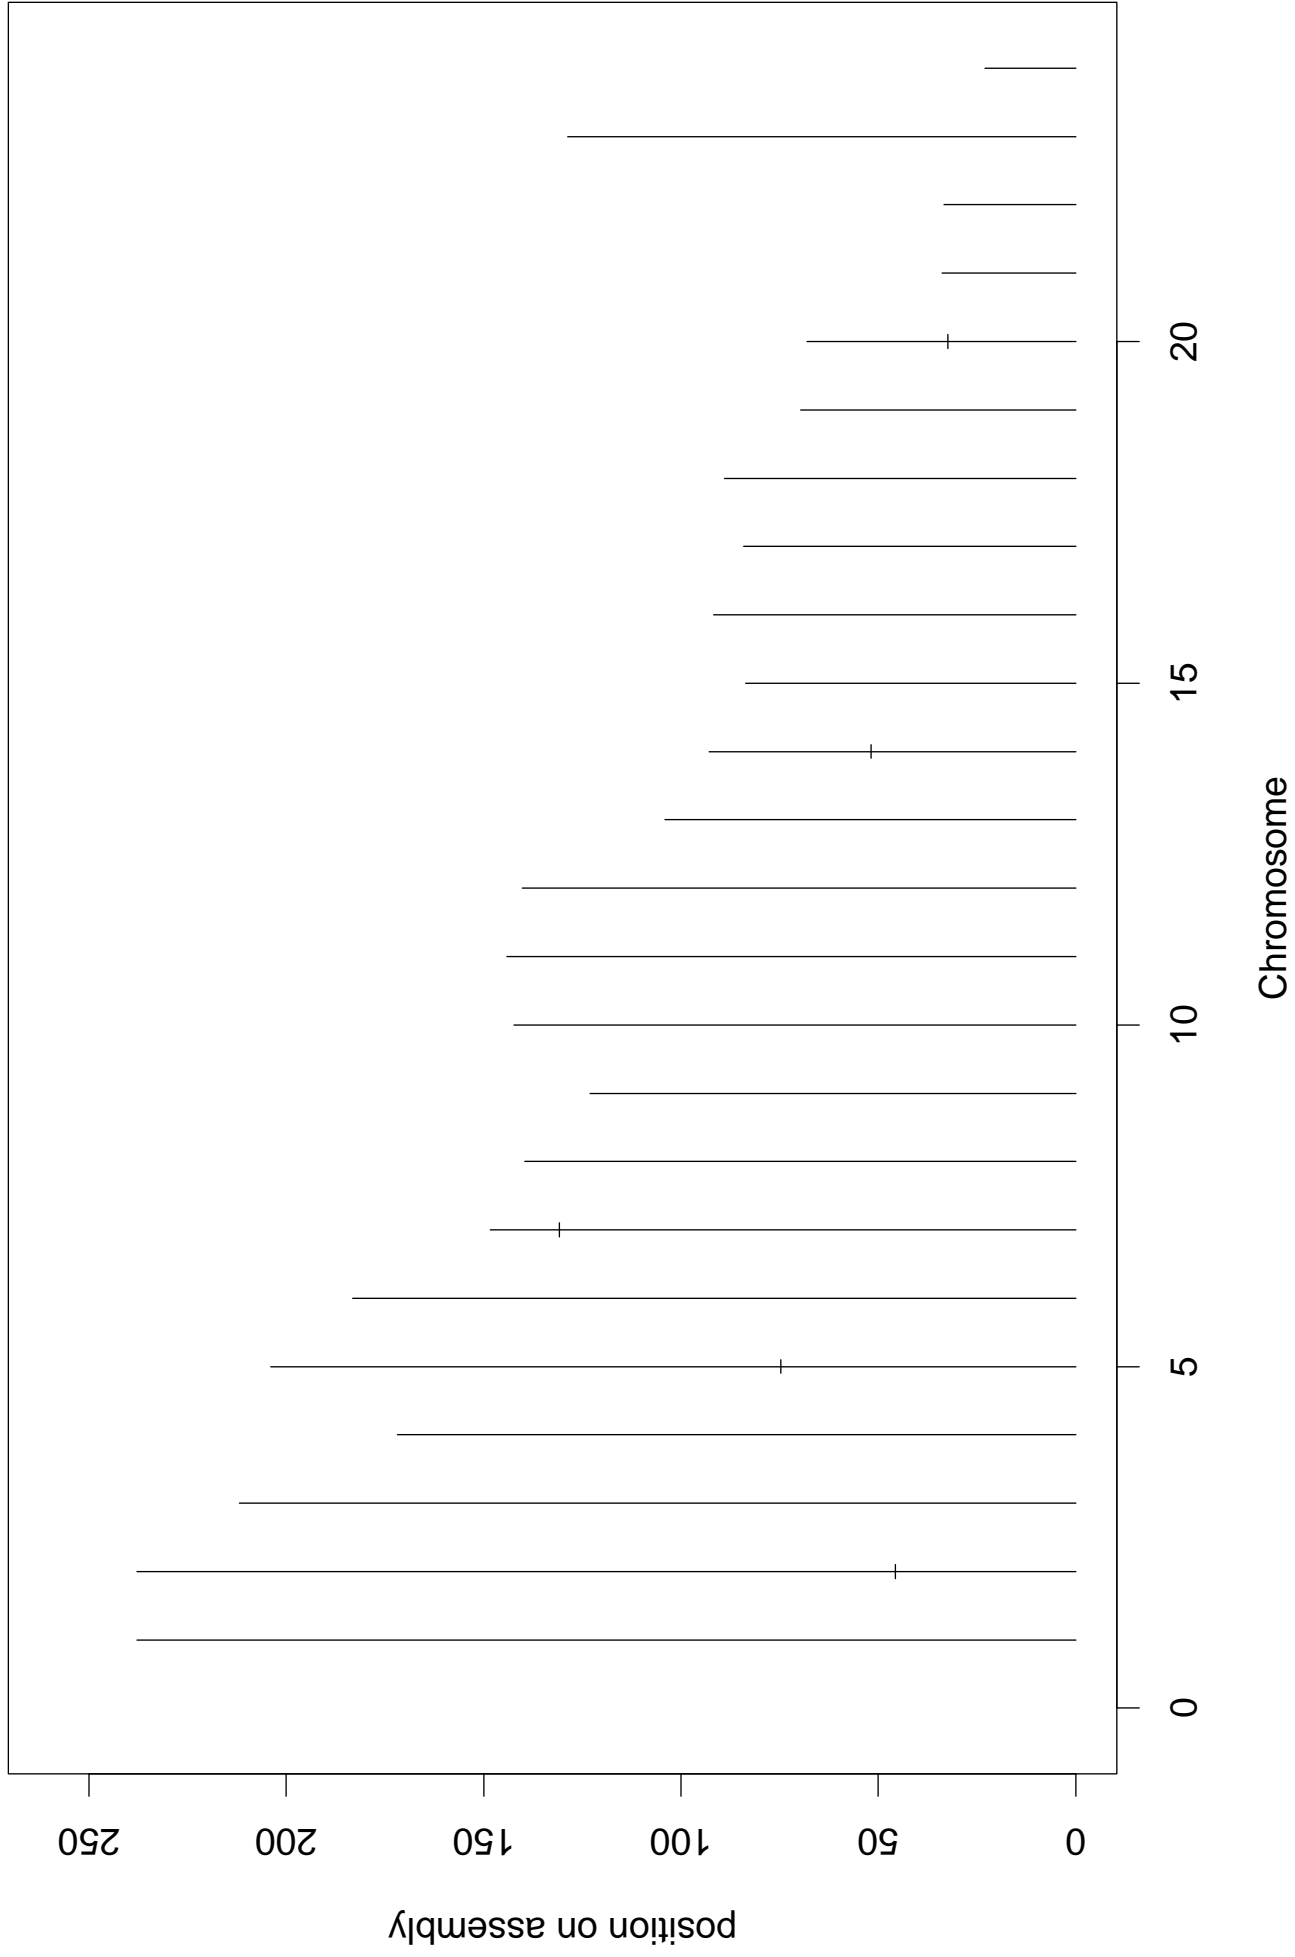

t-cell

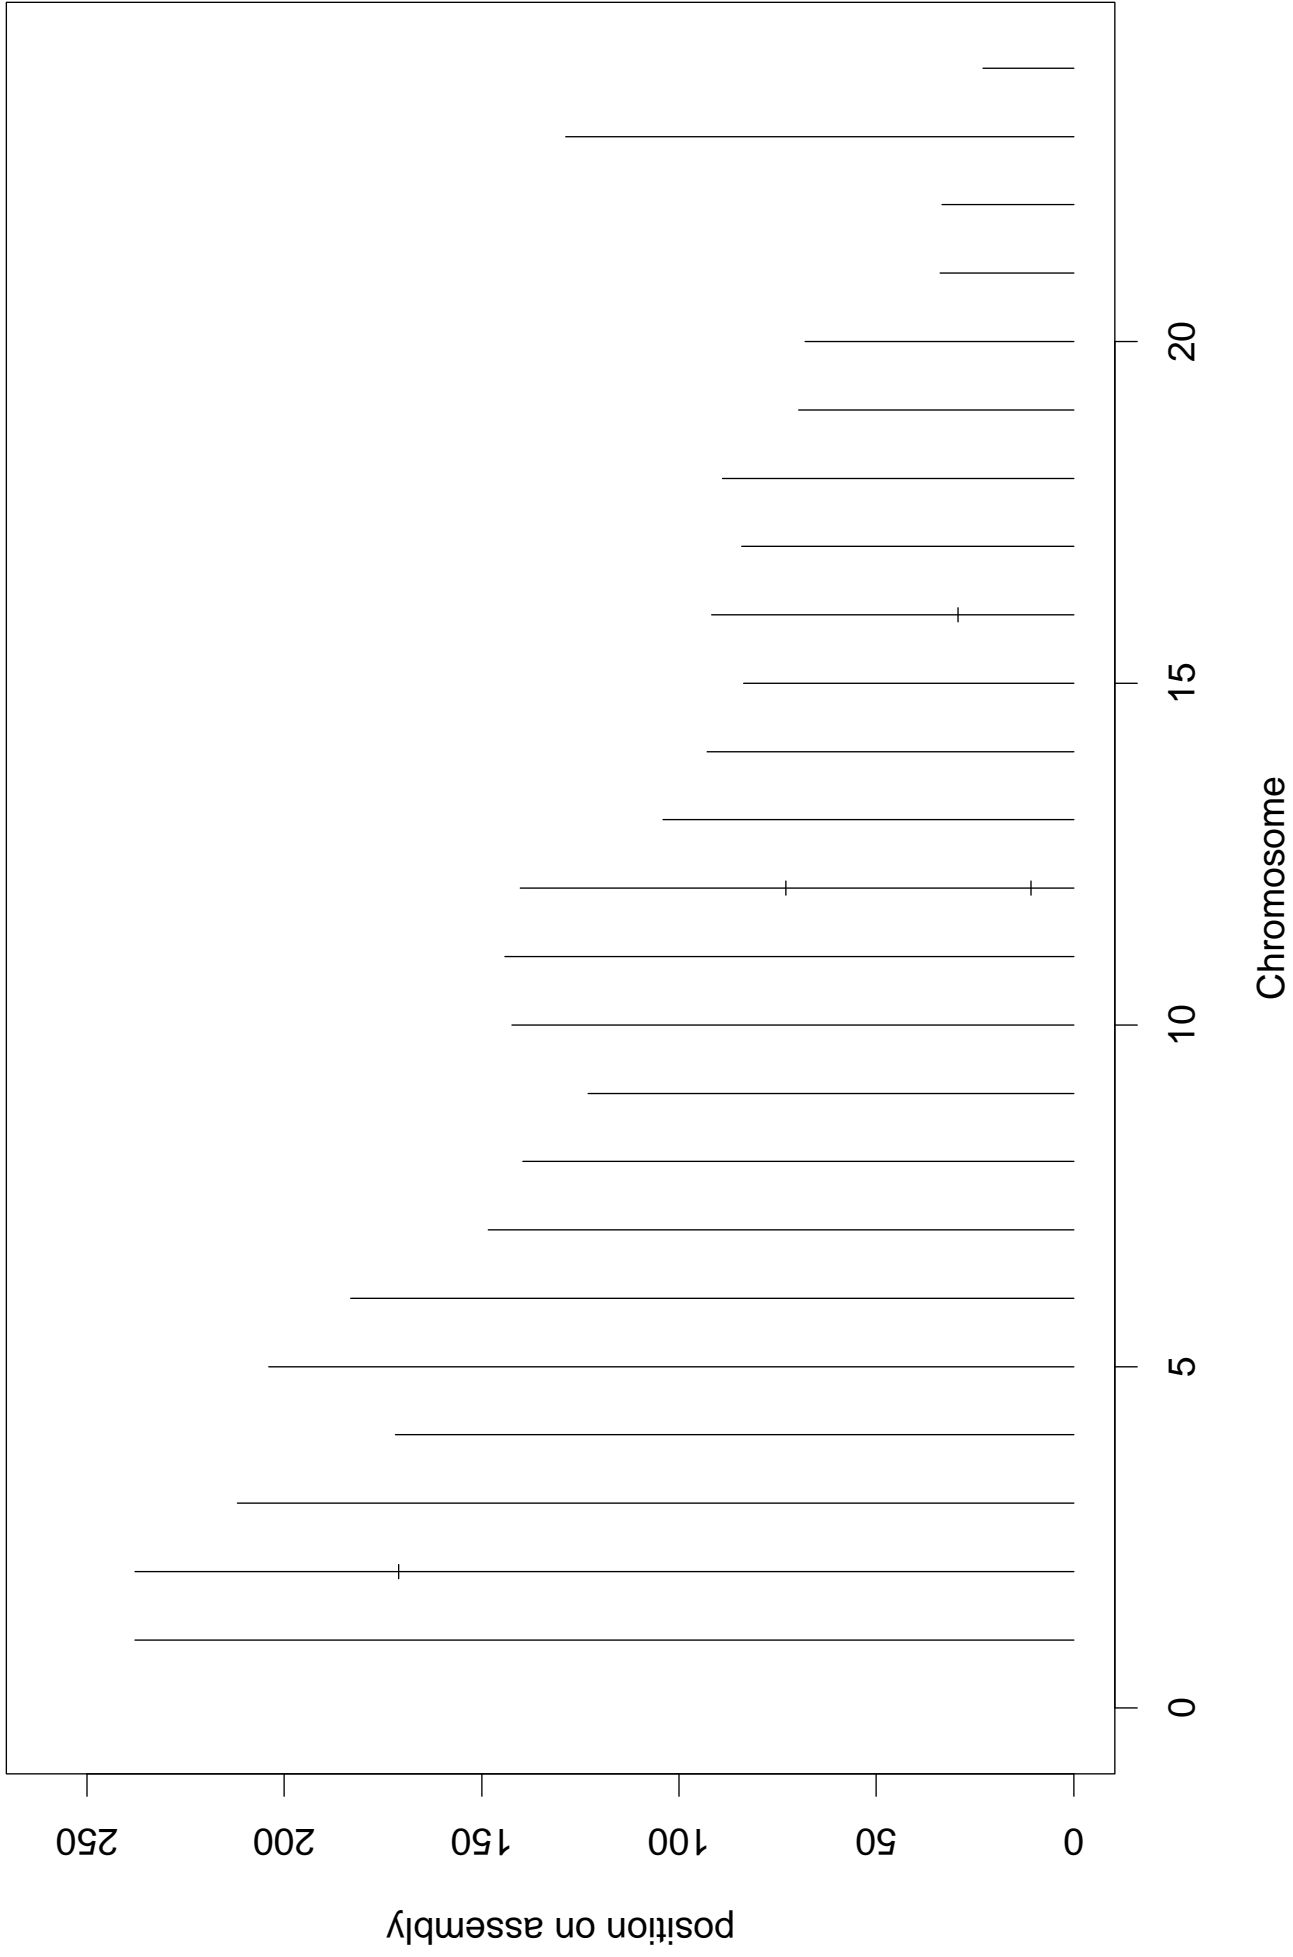

senescent

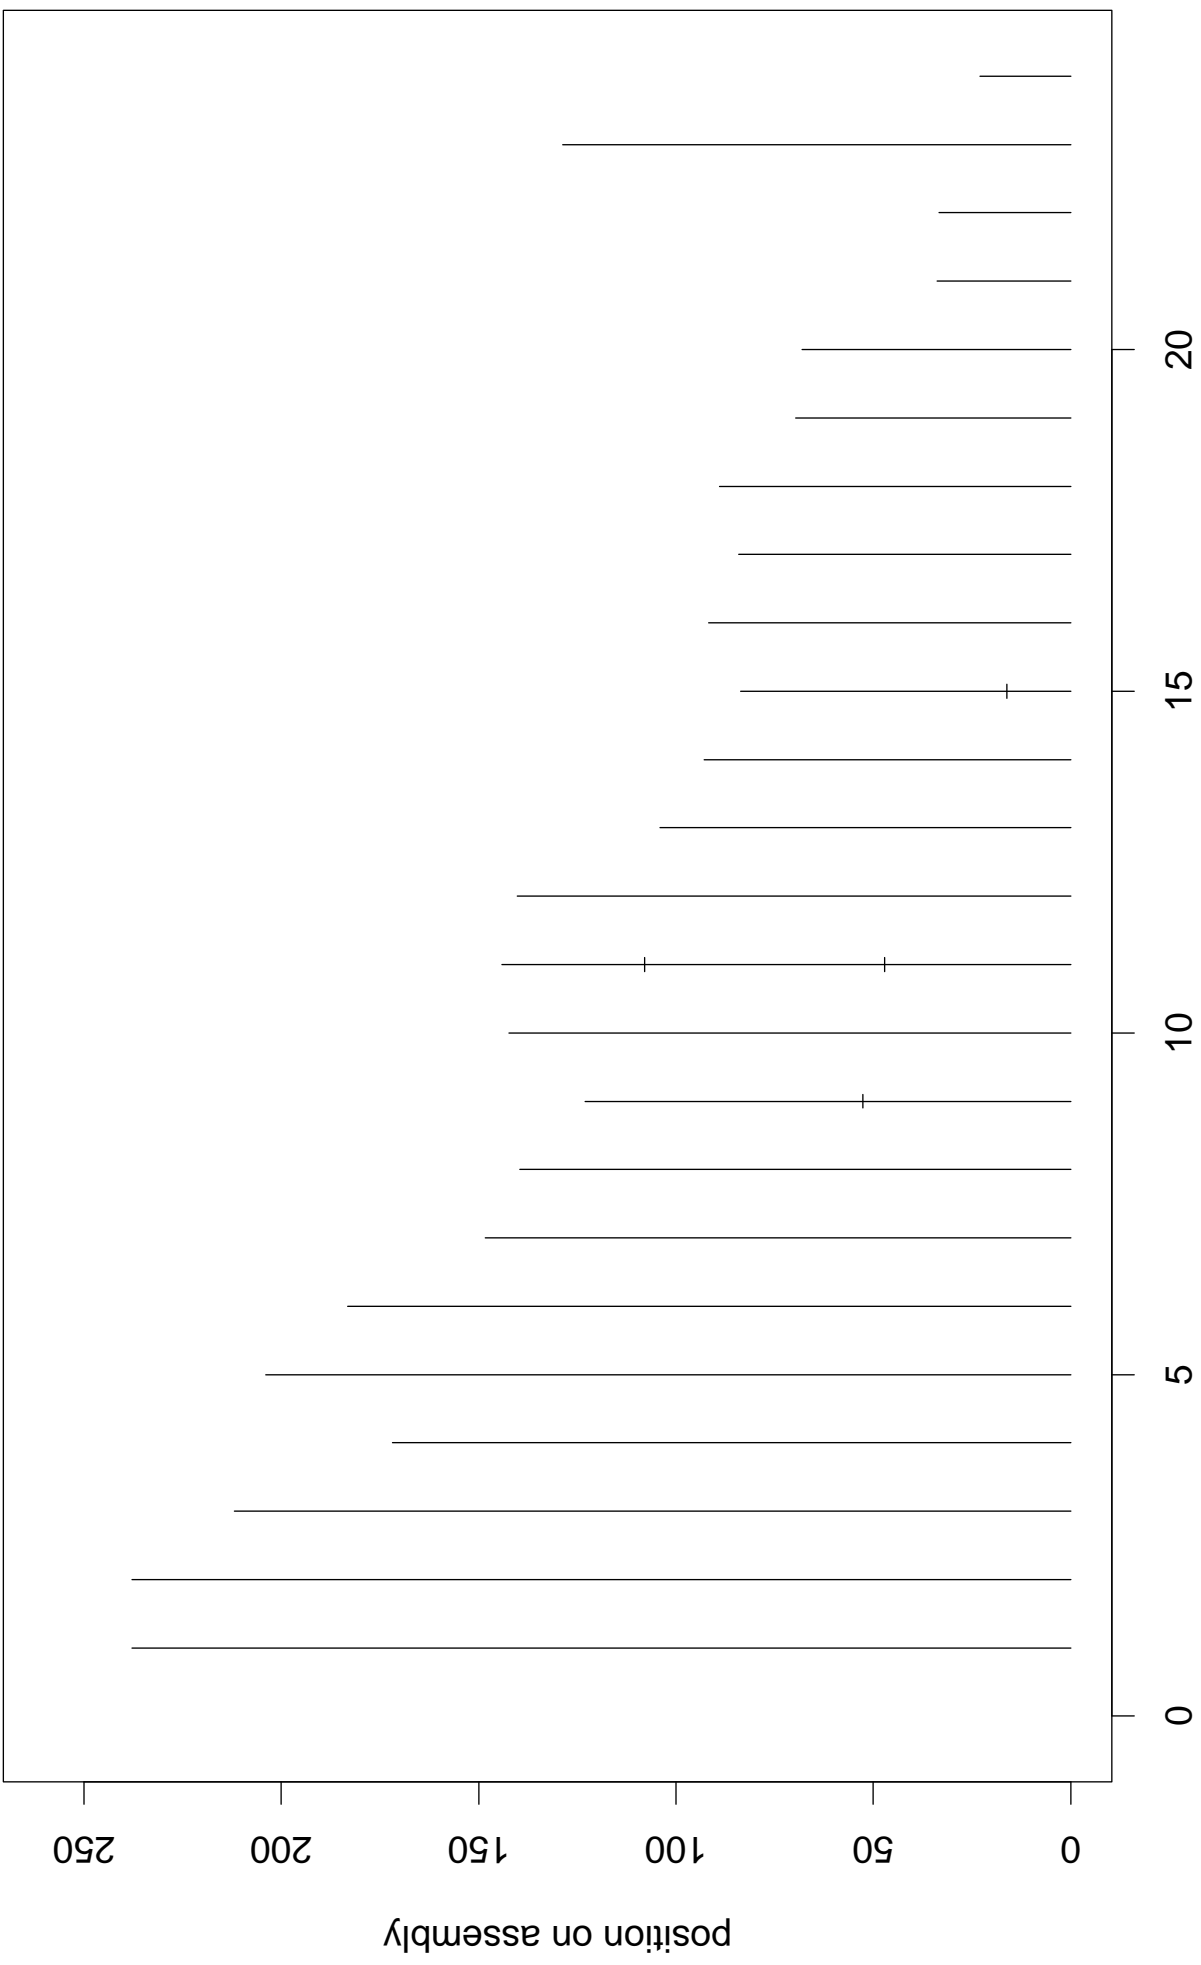

Chromosome

position on assembly

250 200 150 100 50 0

0 5 10 15 20

# umbilical cord

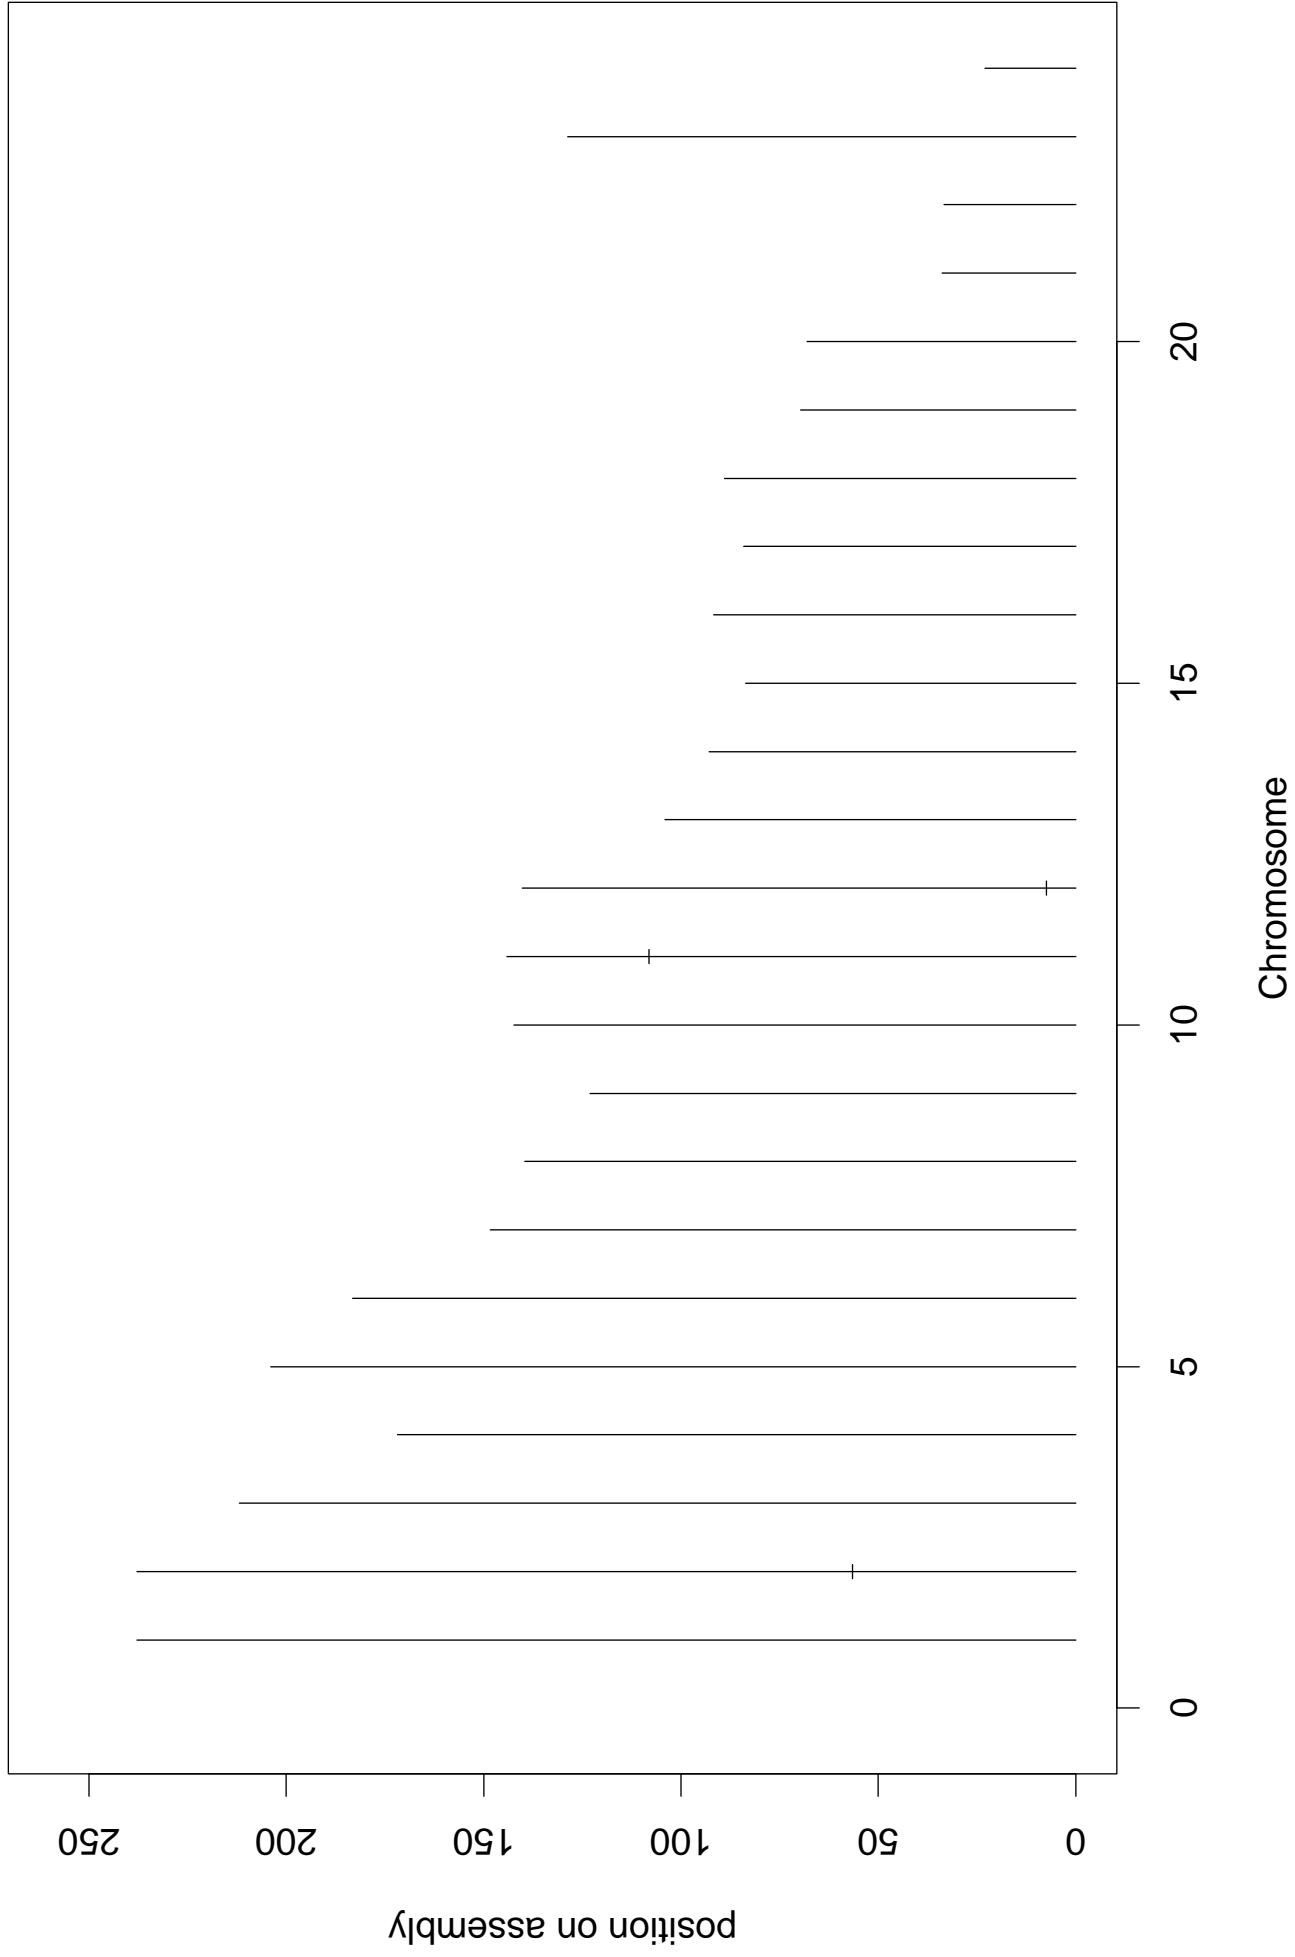



# thymus

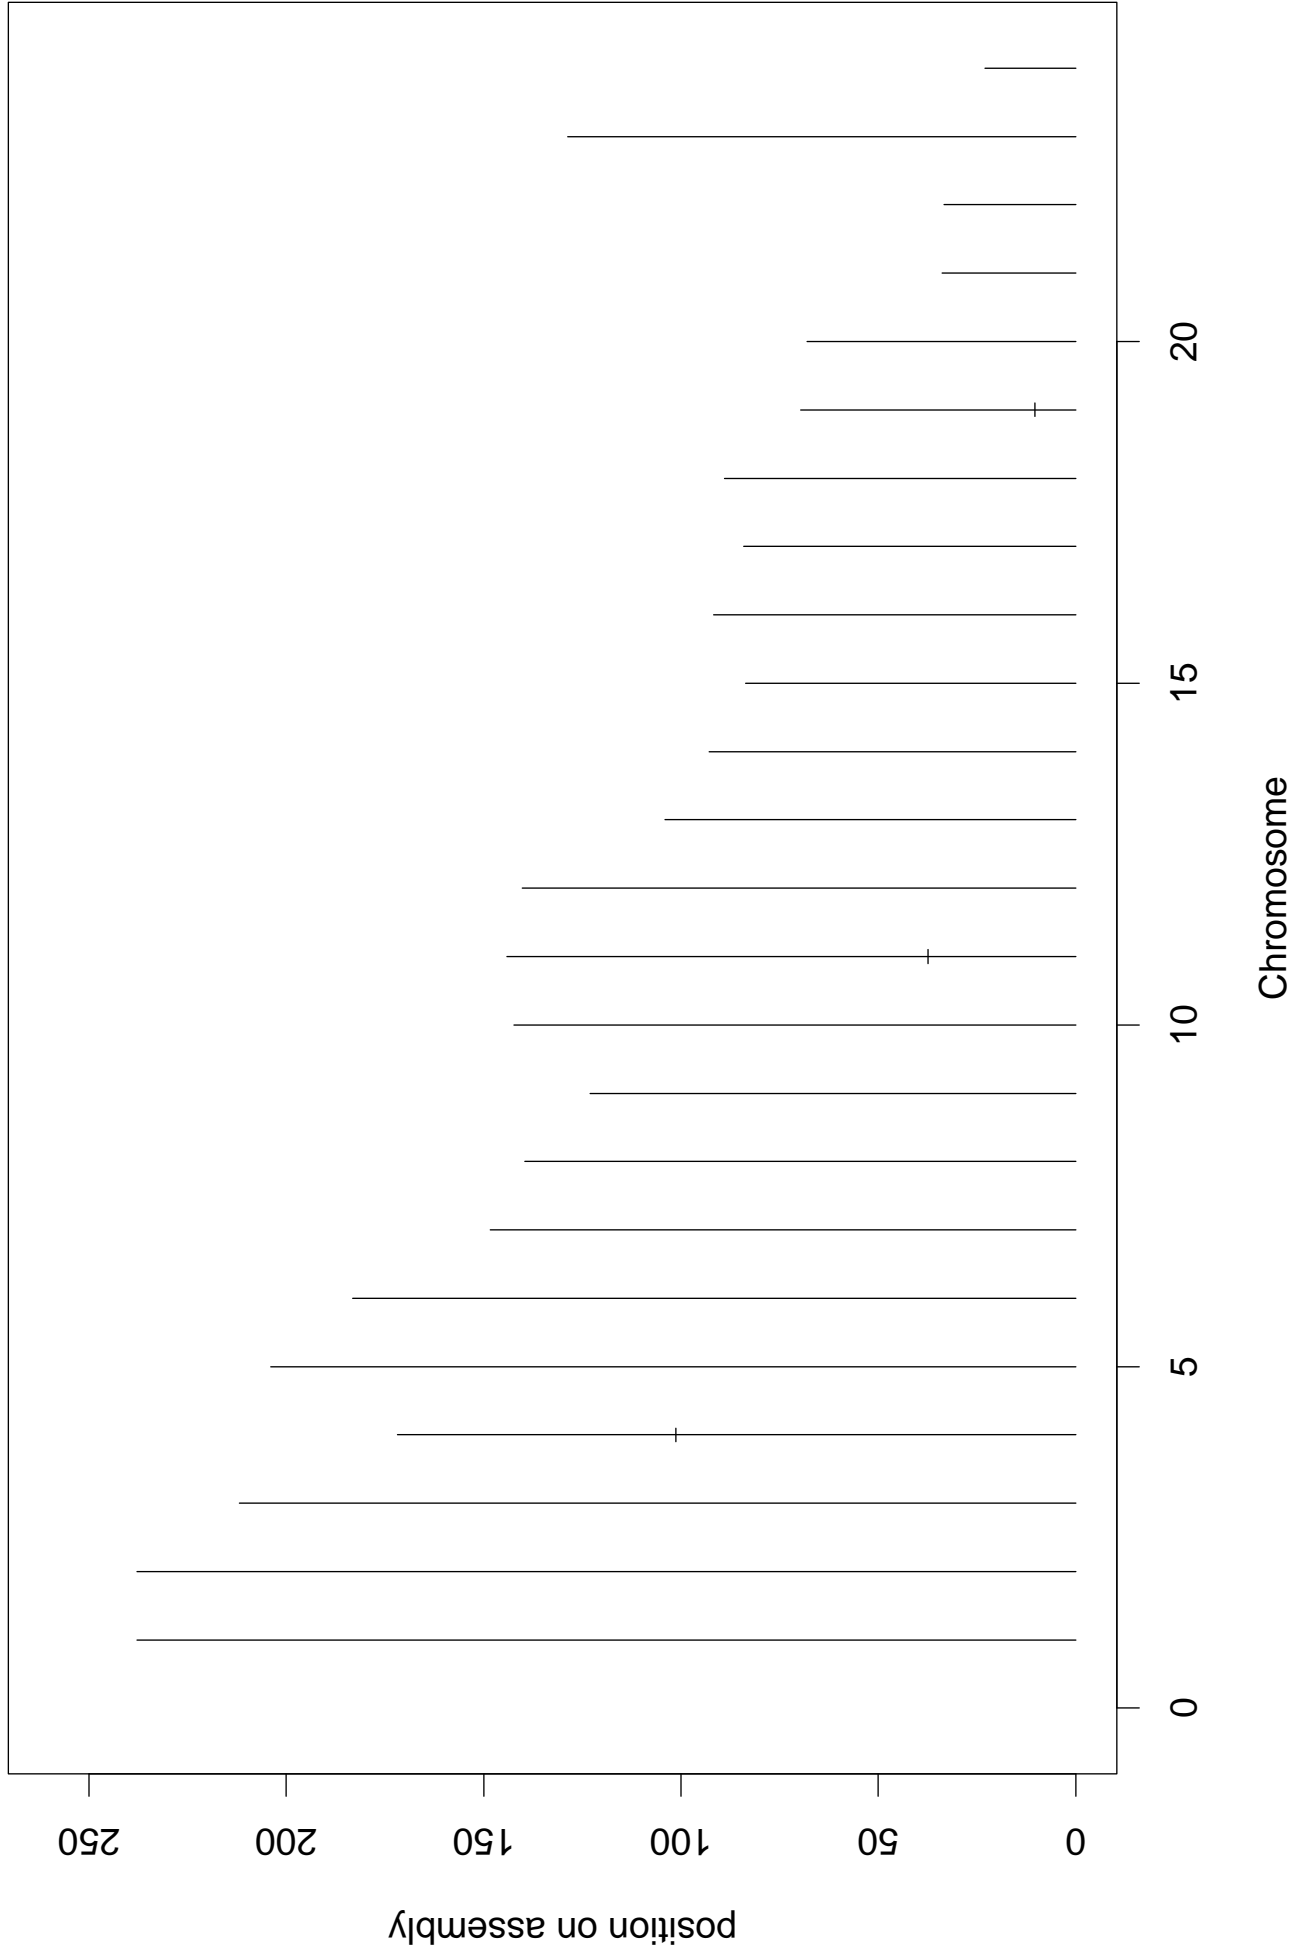

# adrenal gland

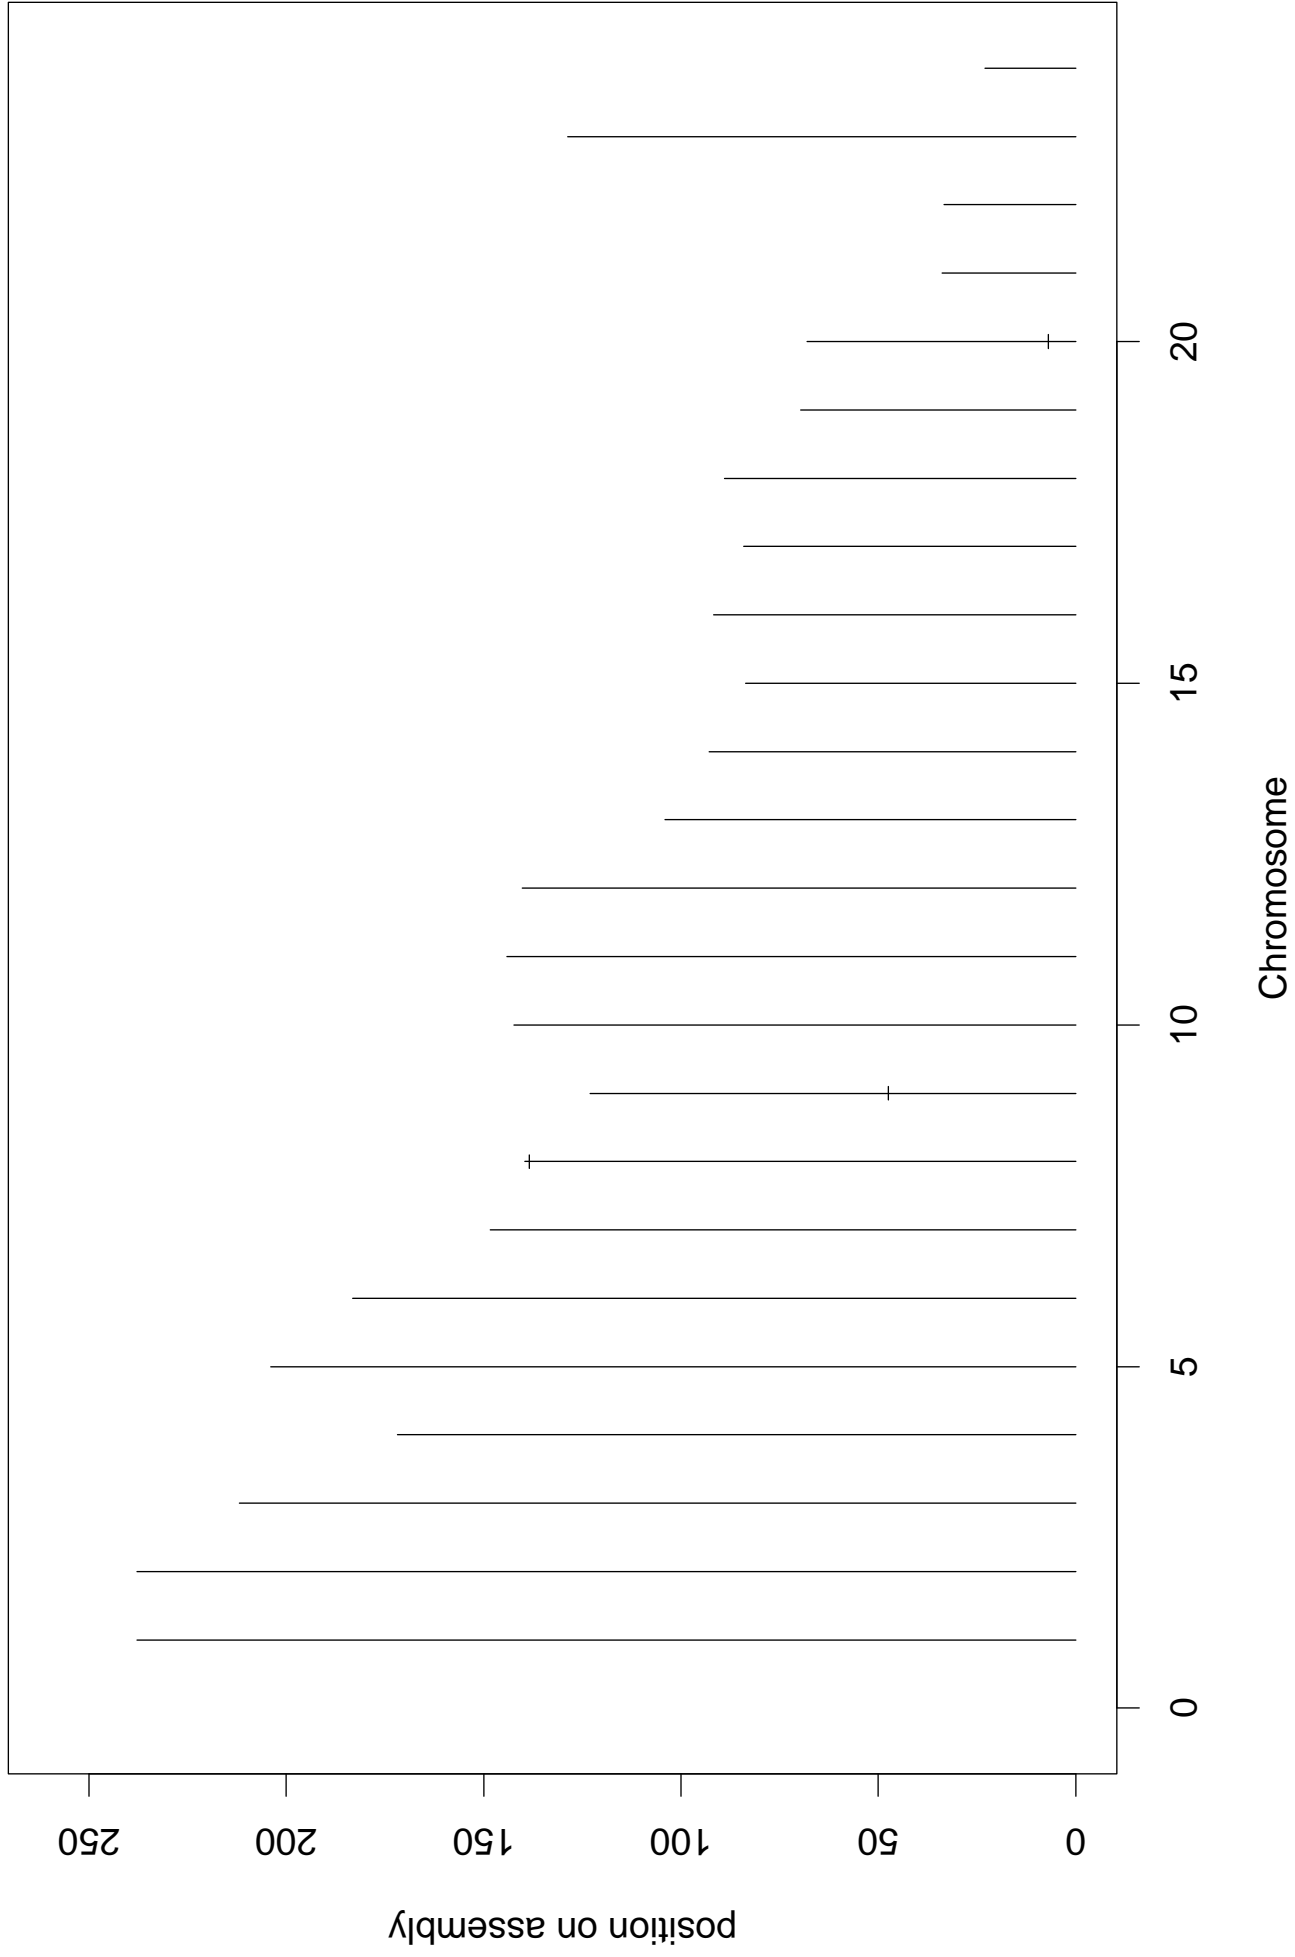

fetal

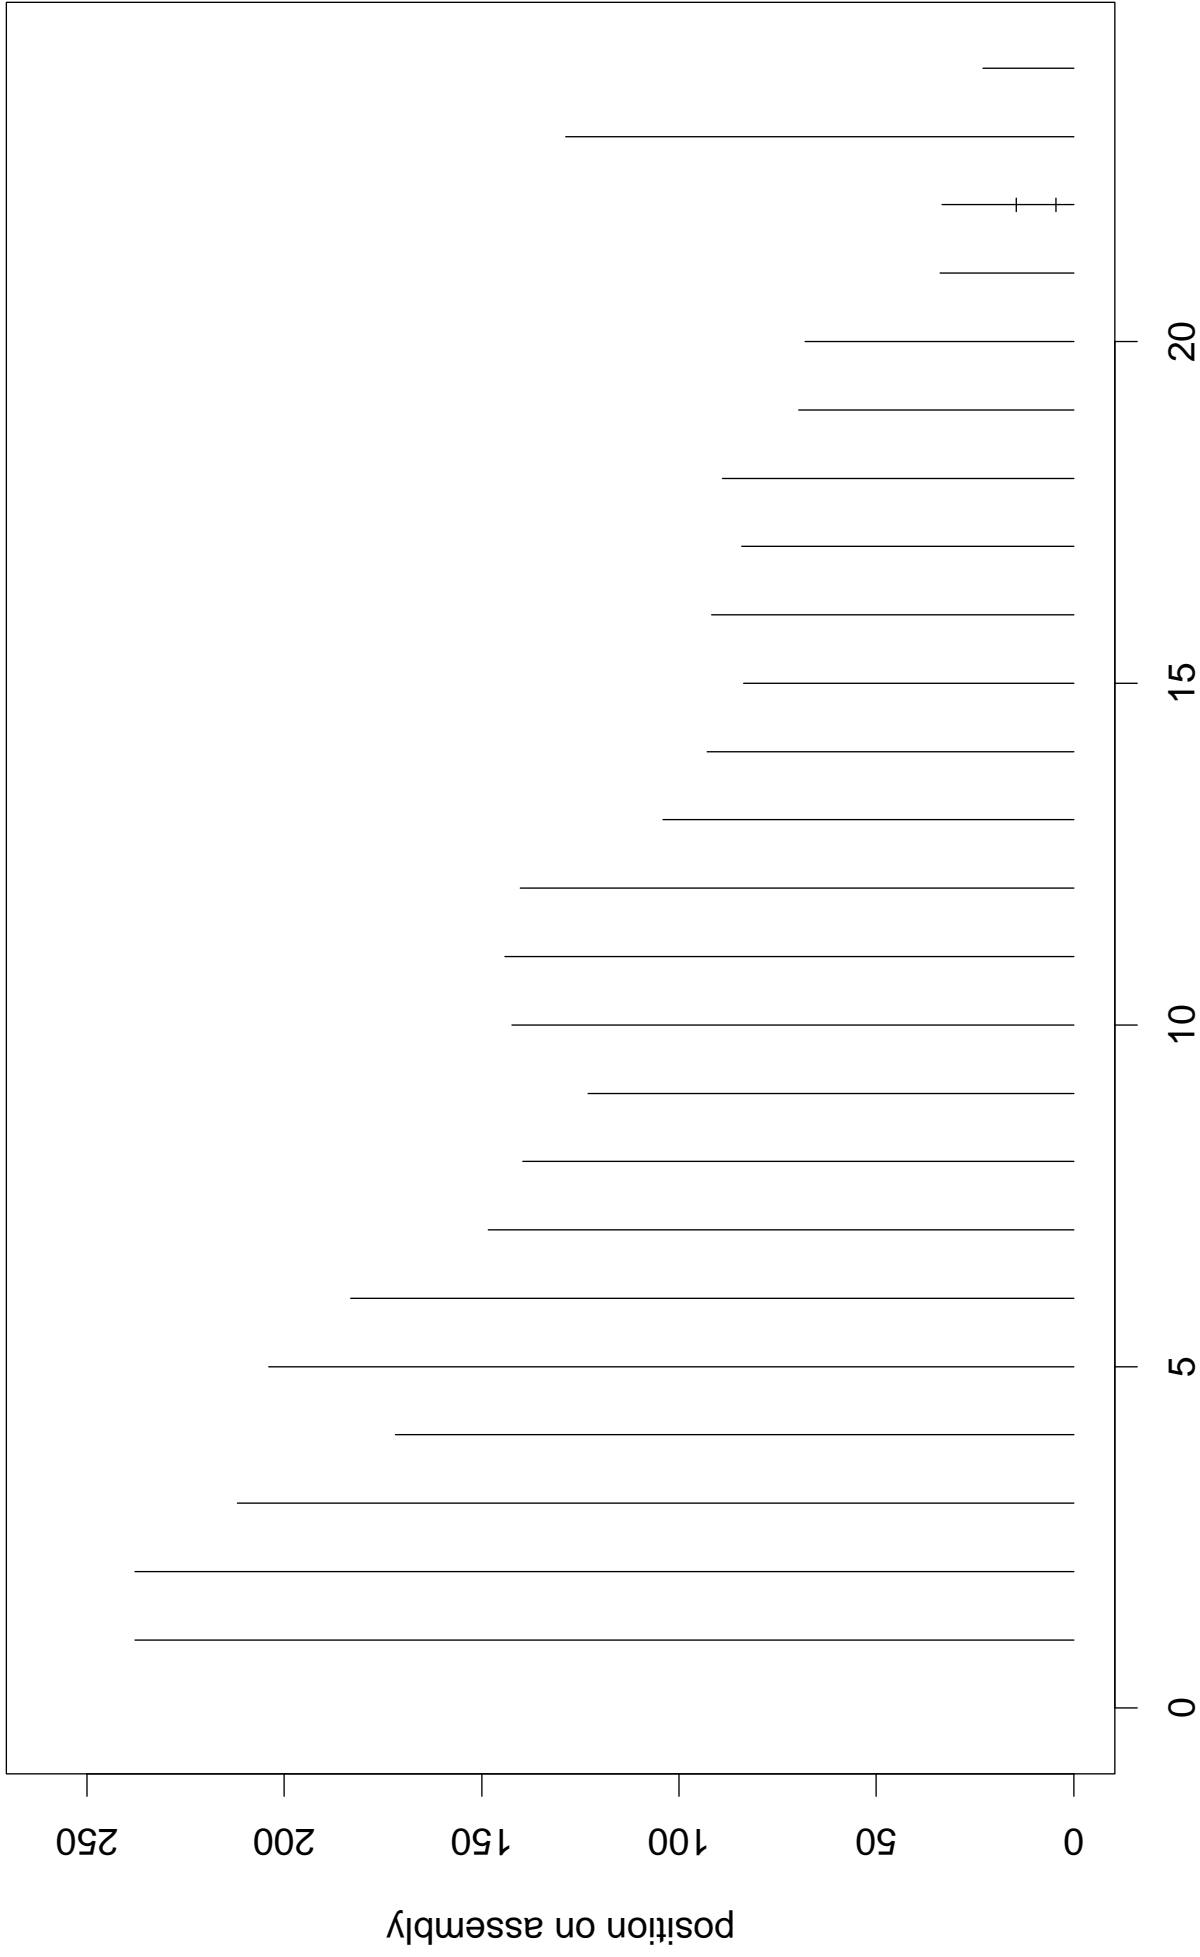

Chromosome

position on assembly

# thyroid

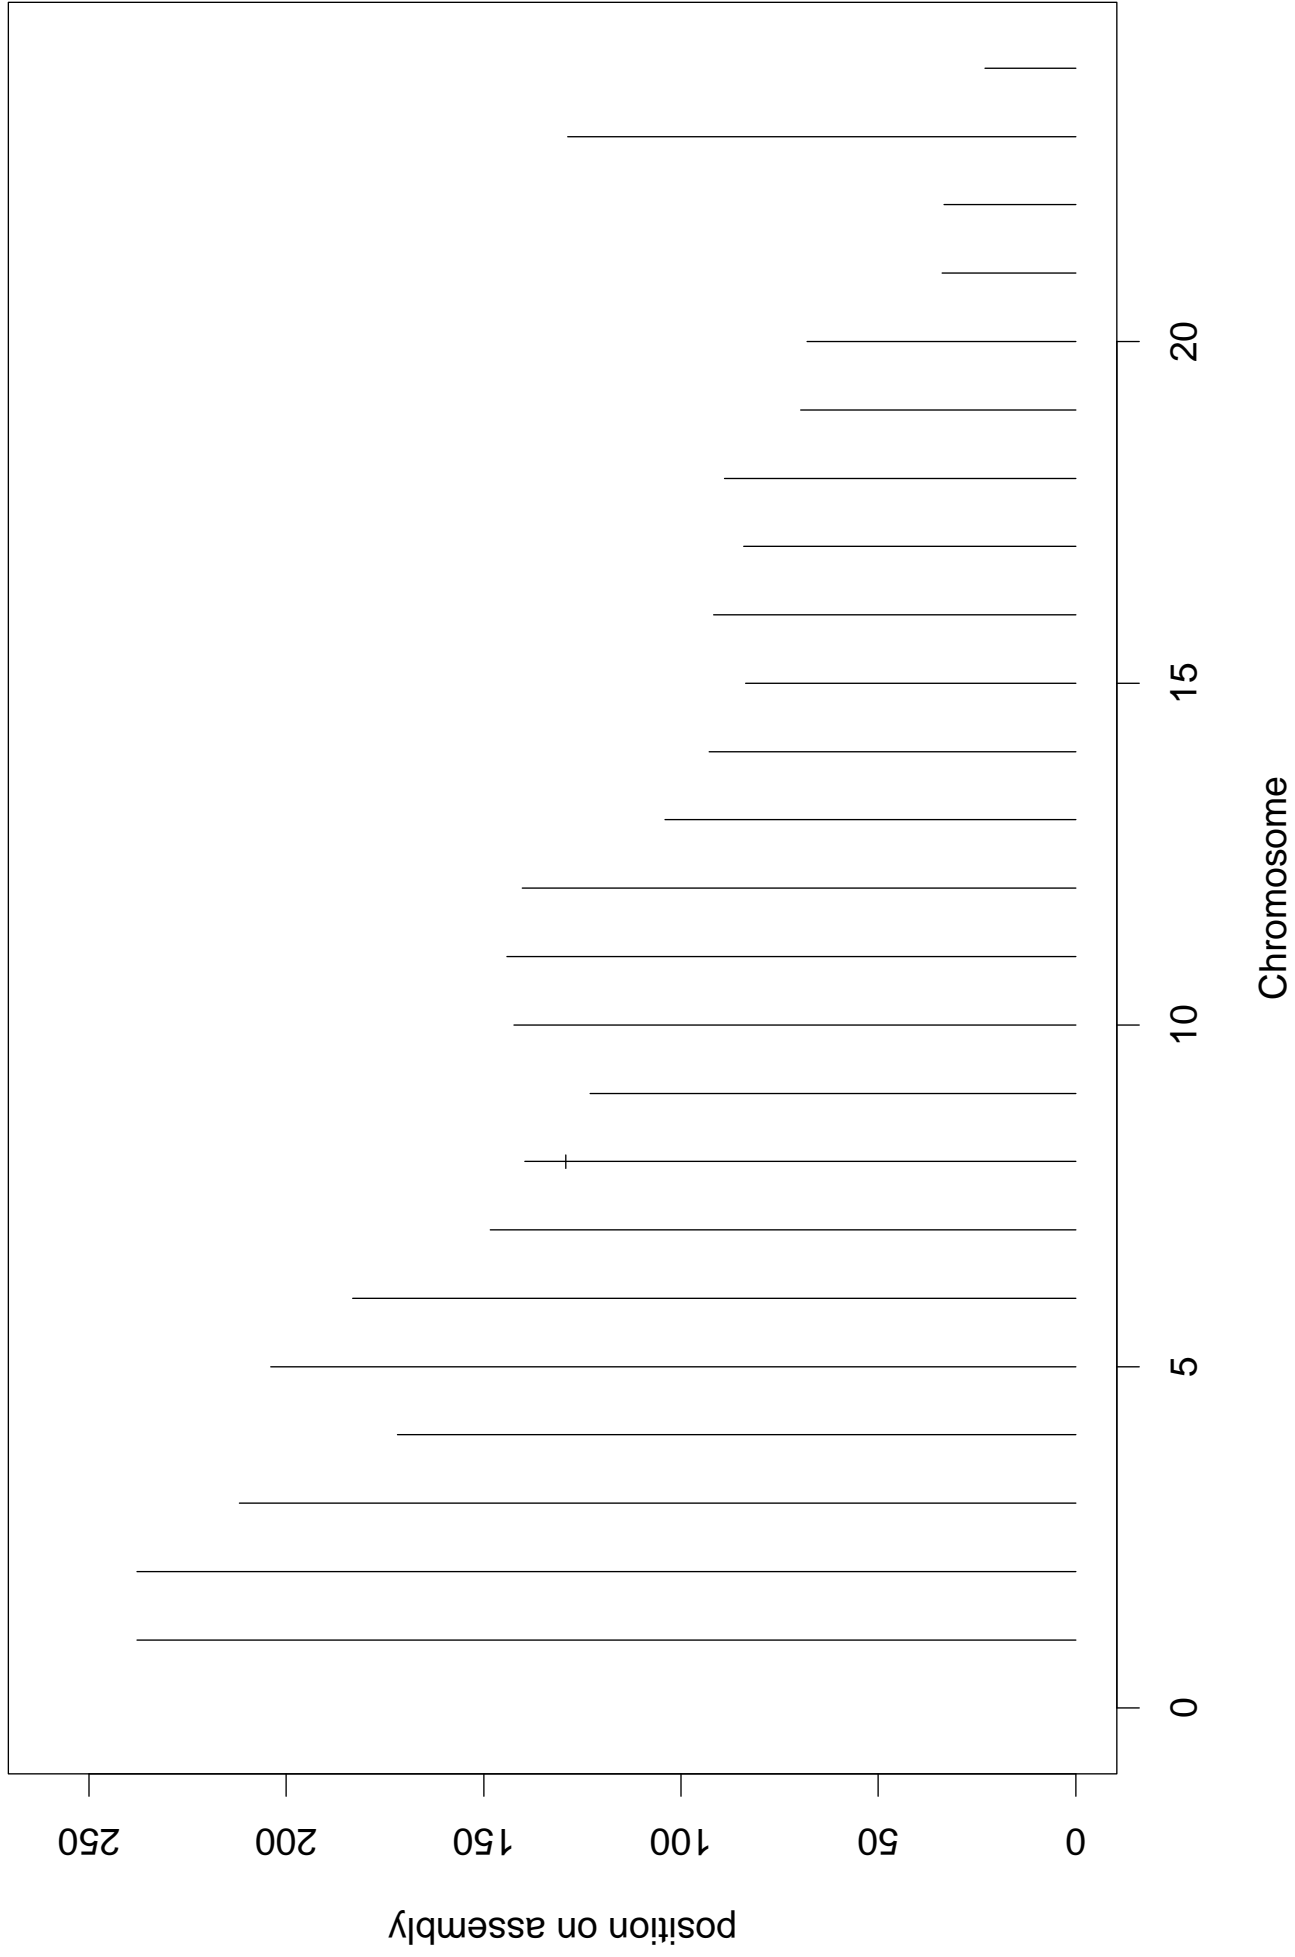

# lung+testis+b-cell

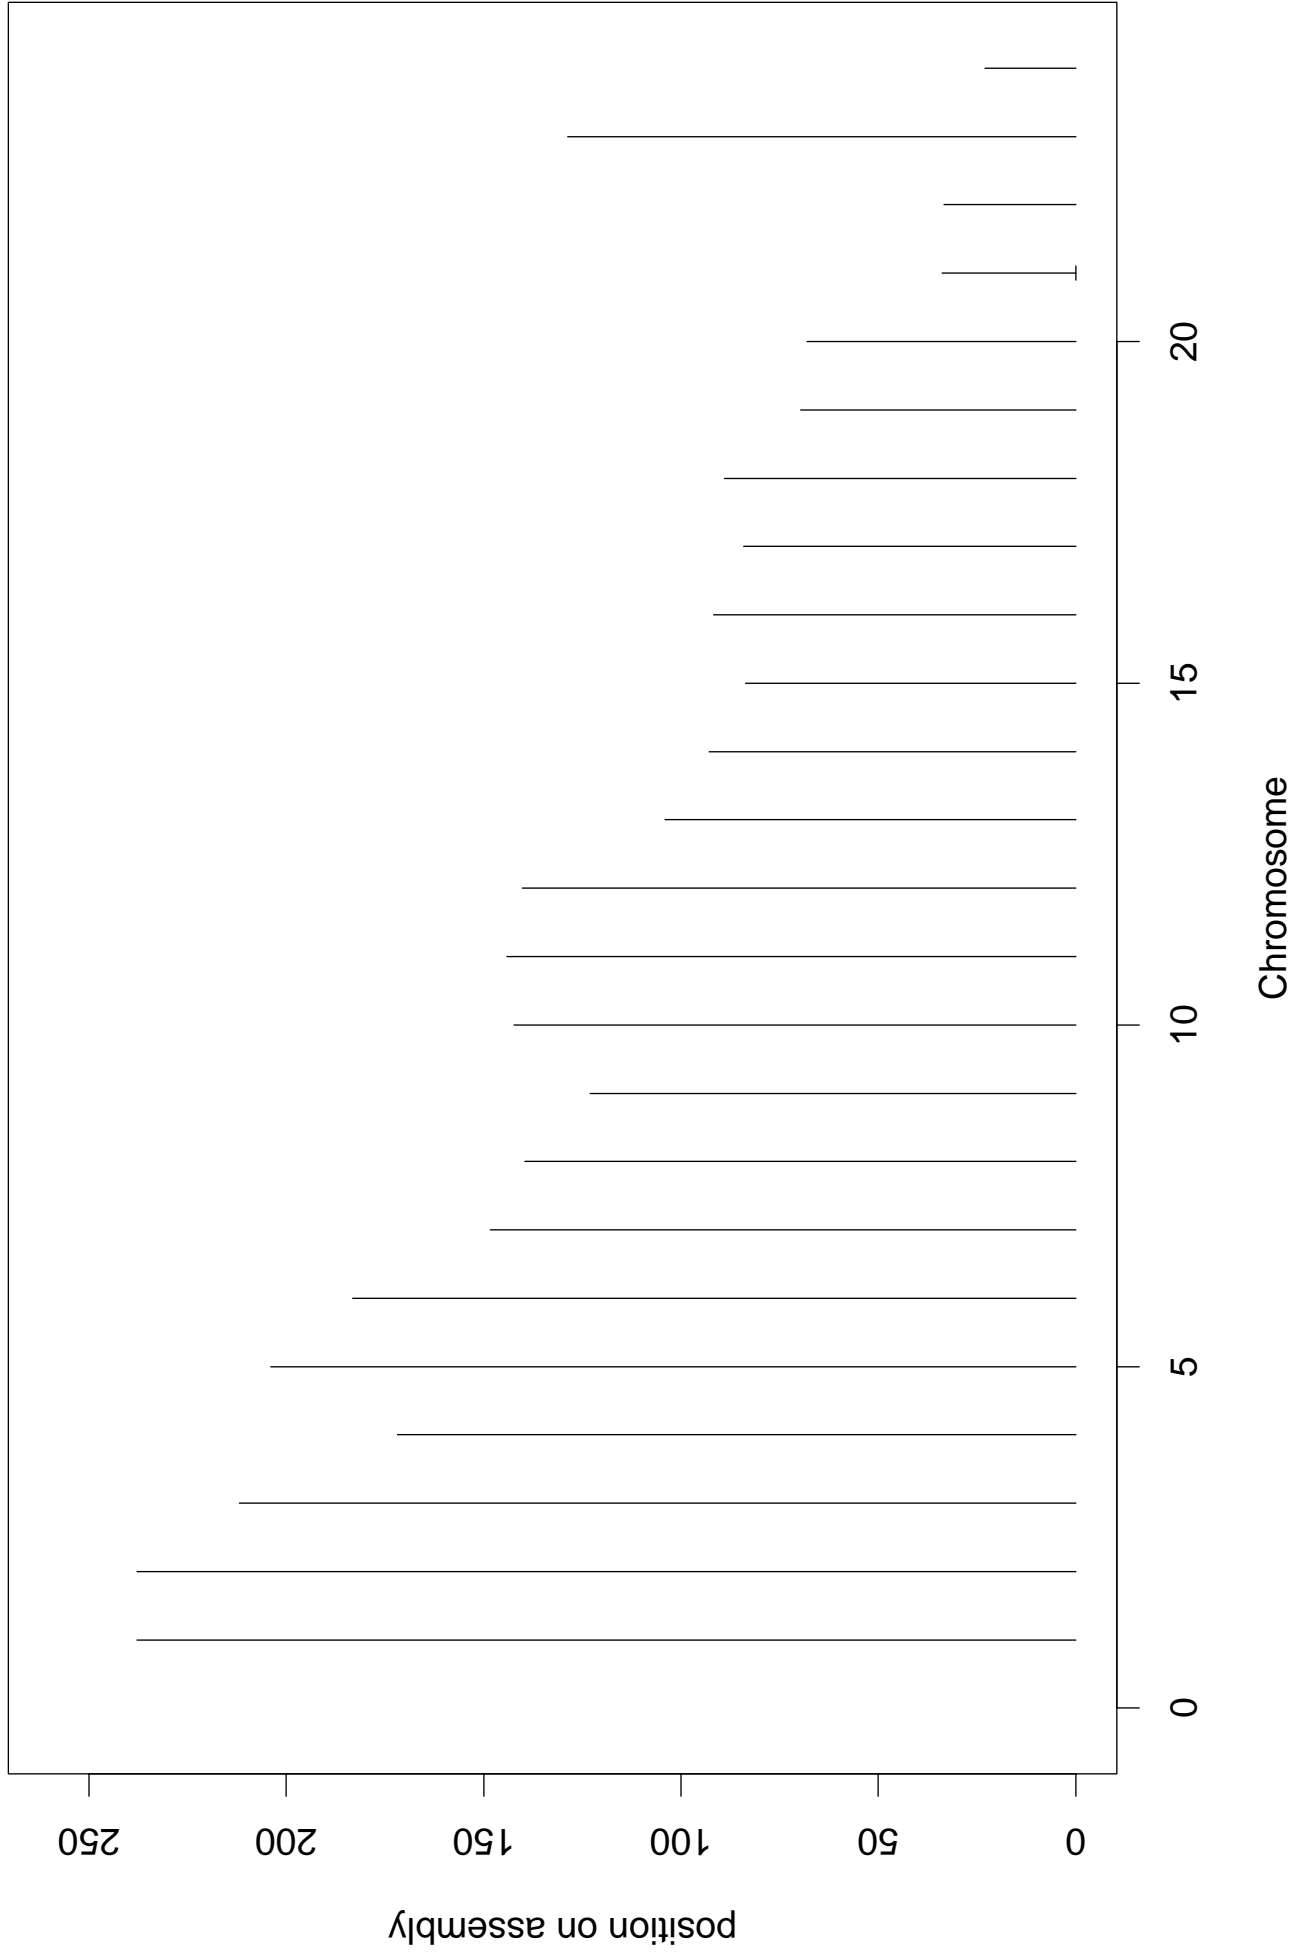

# leiomios

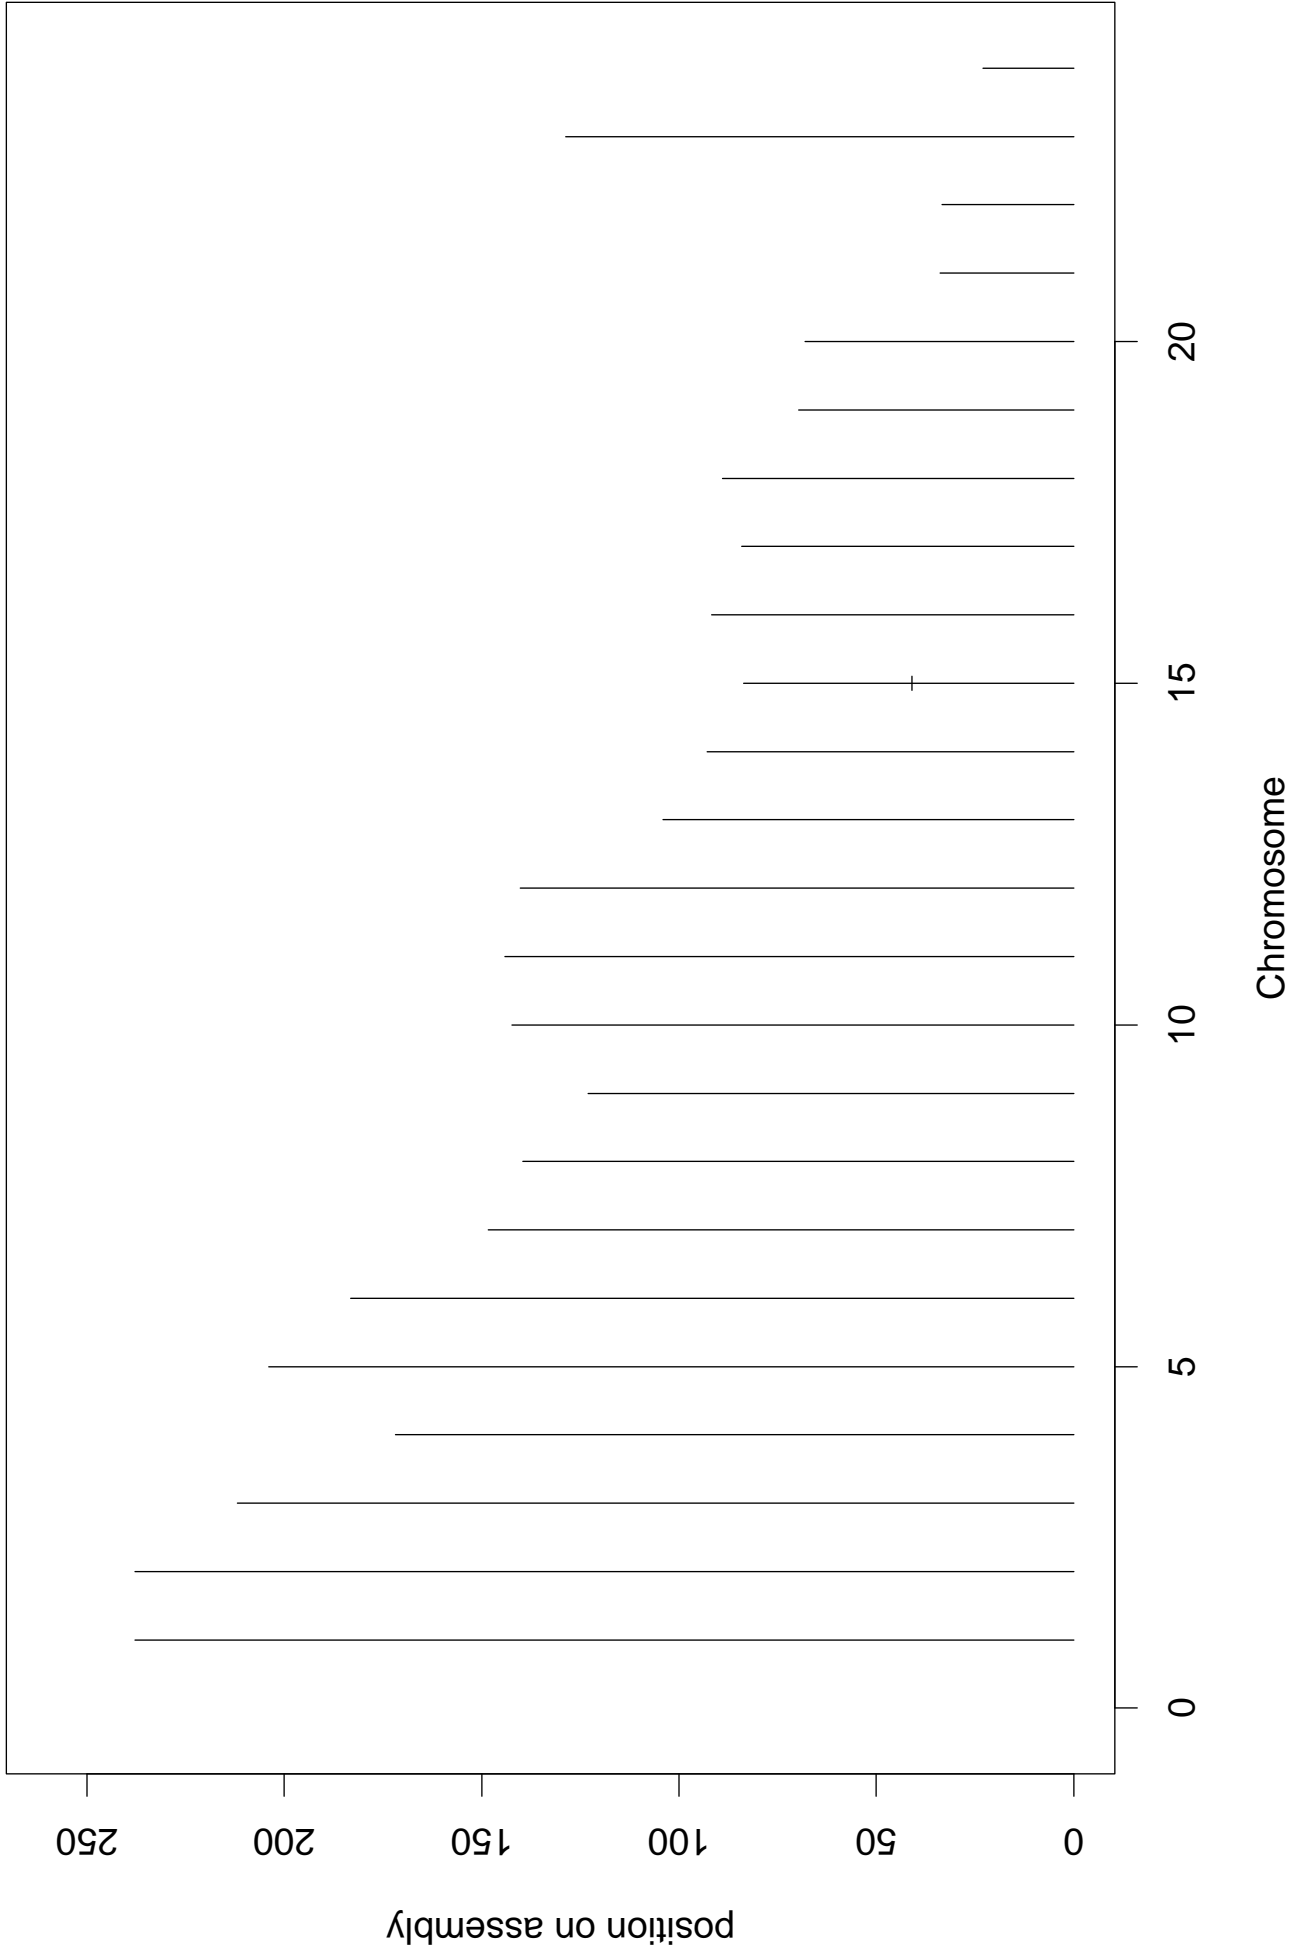

# hpv-immortalized

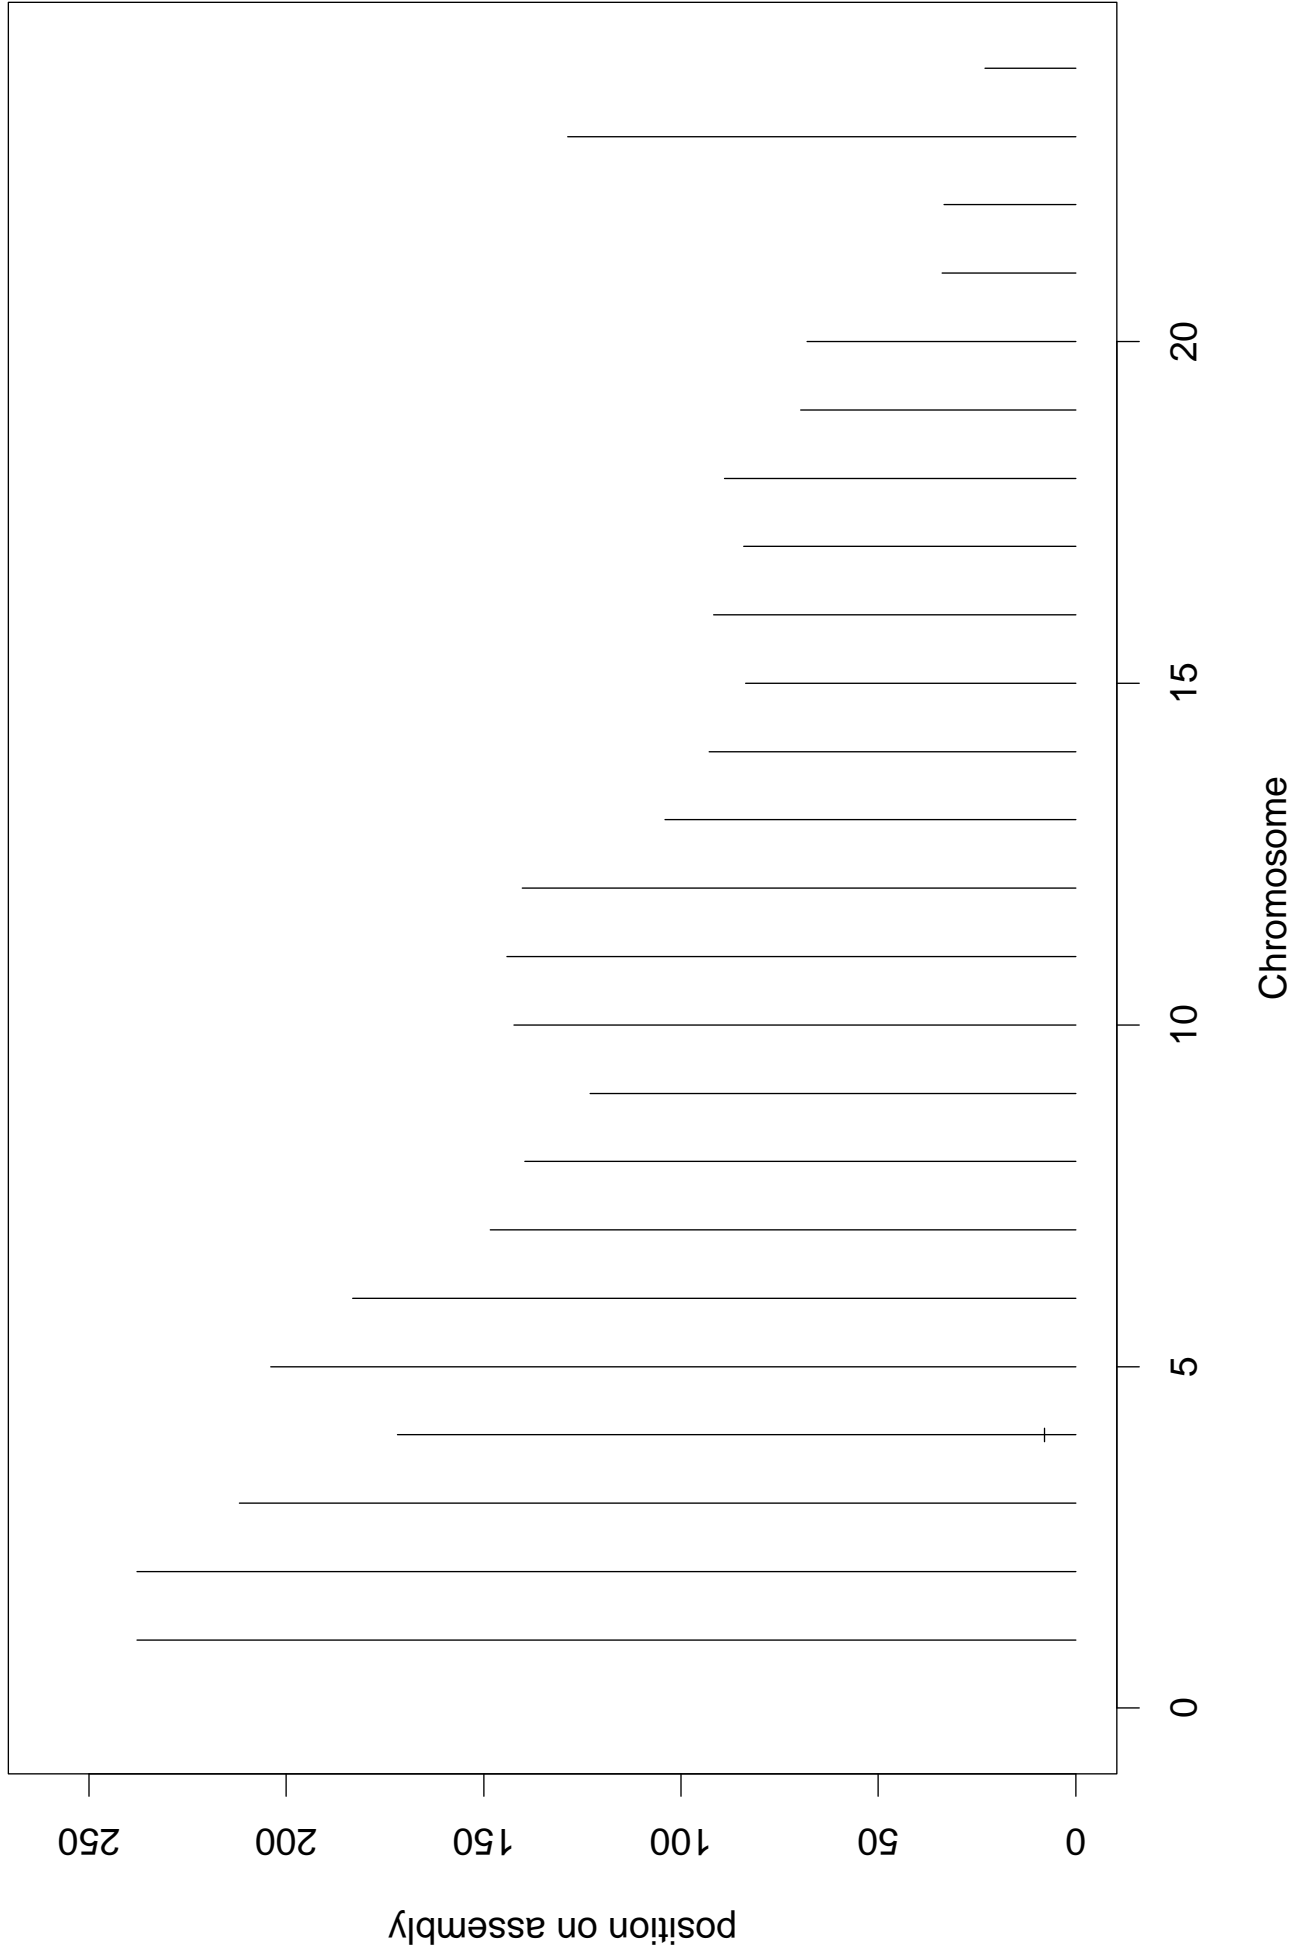

# greater omentum

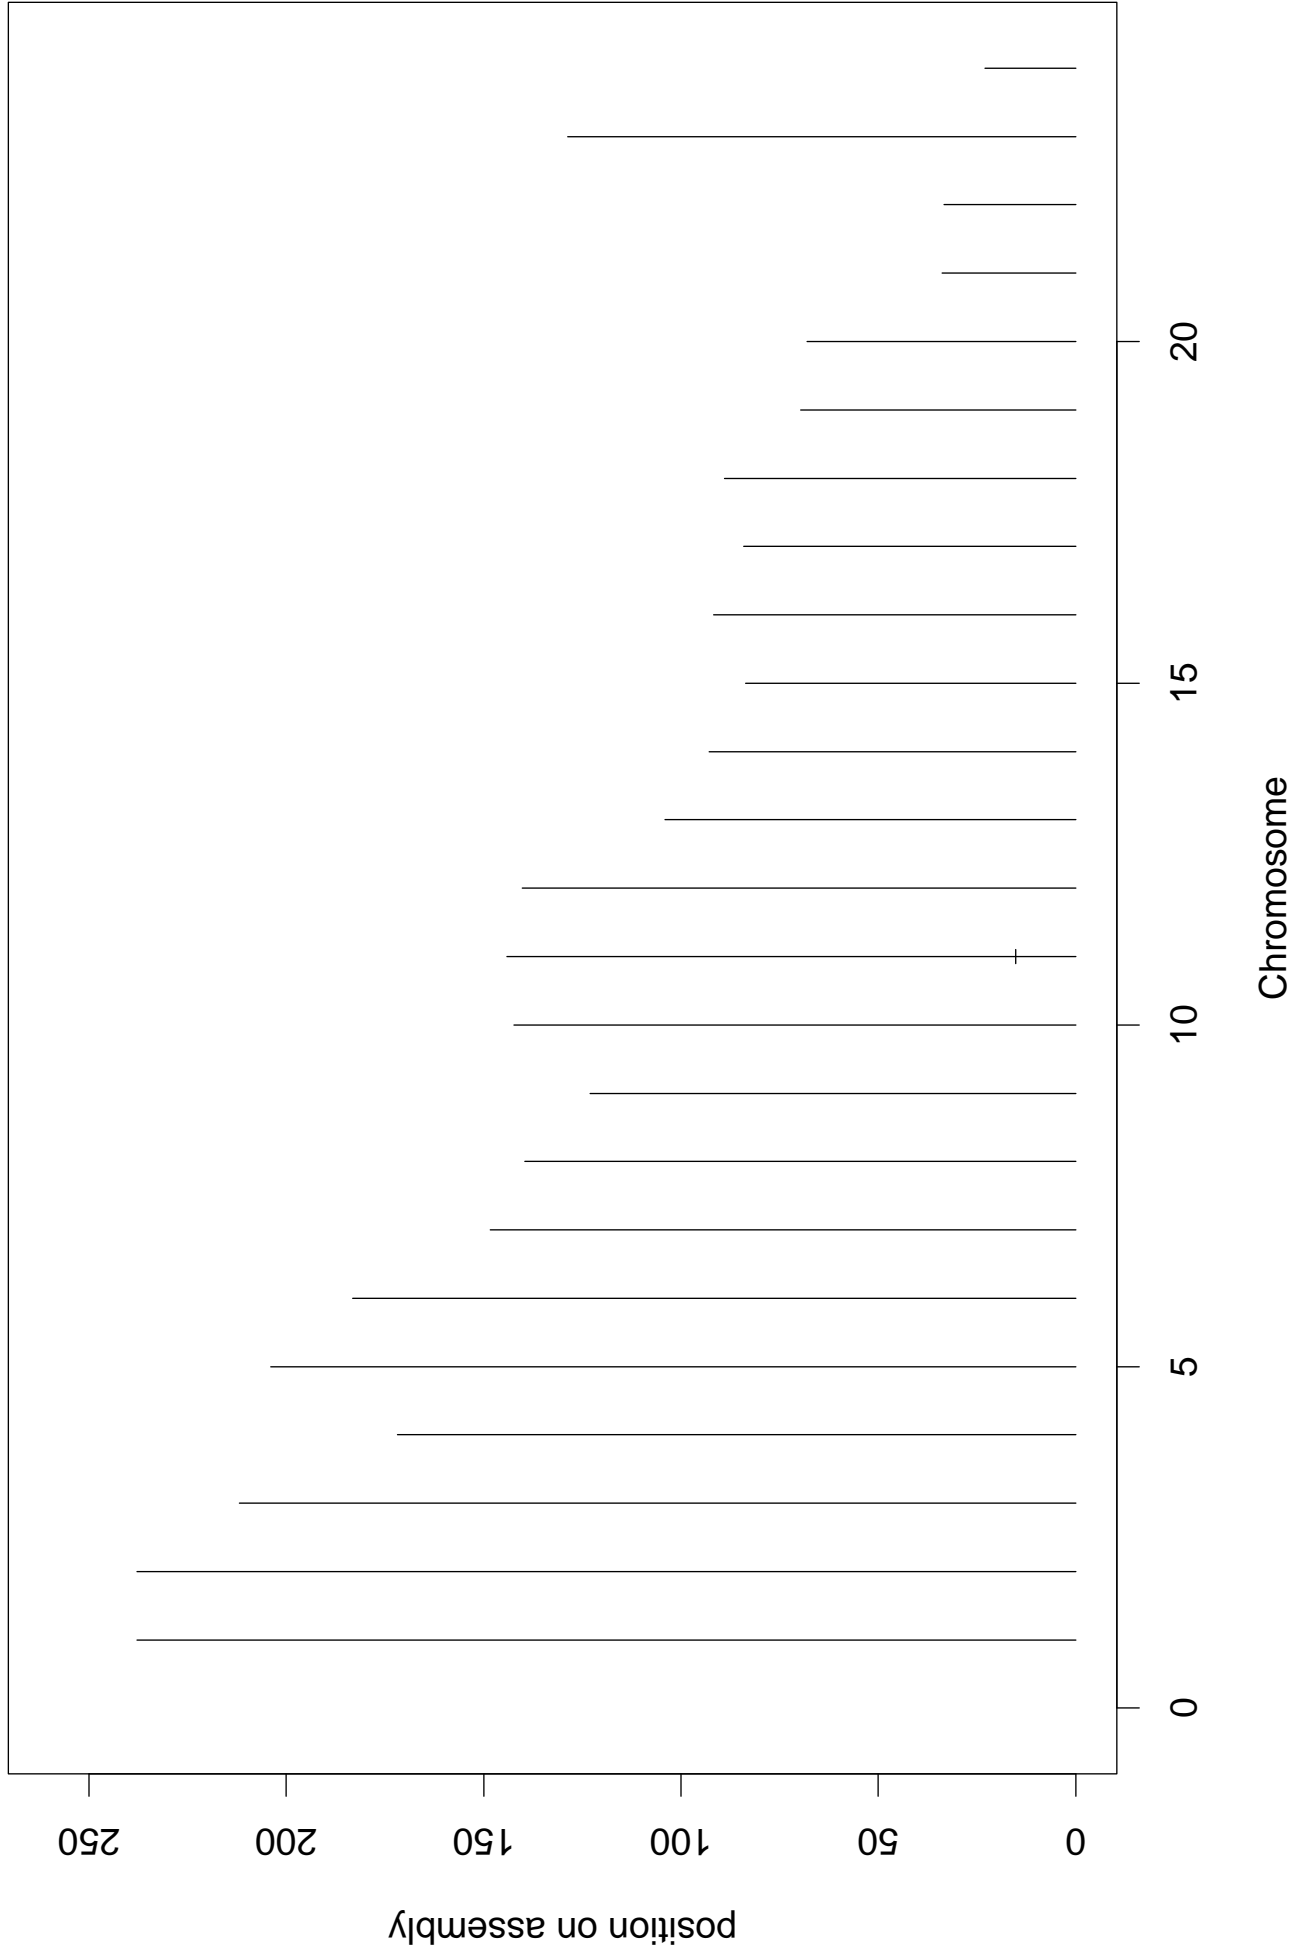



# genitourinary

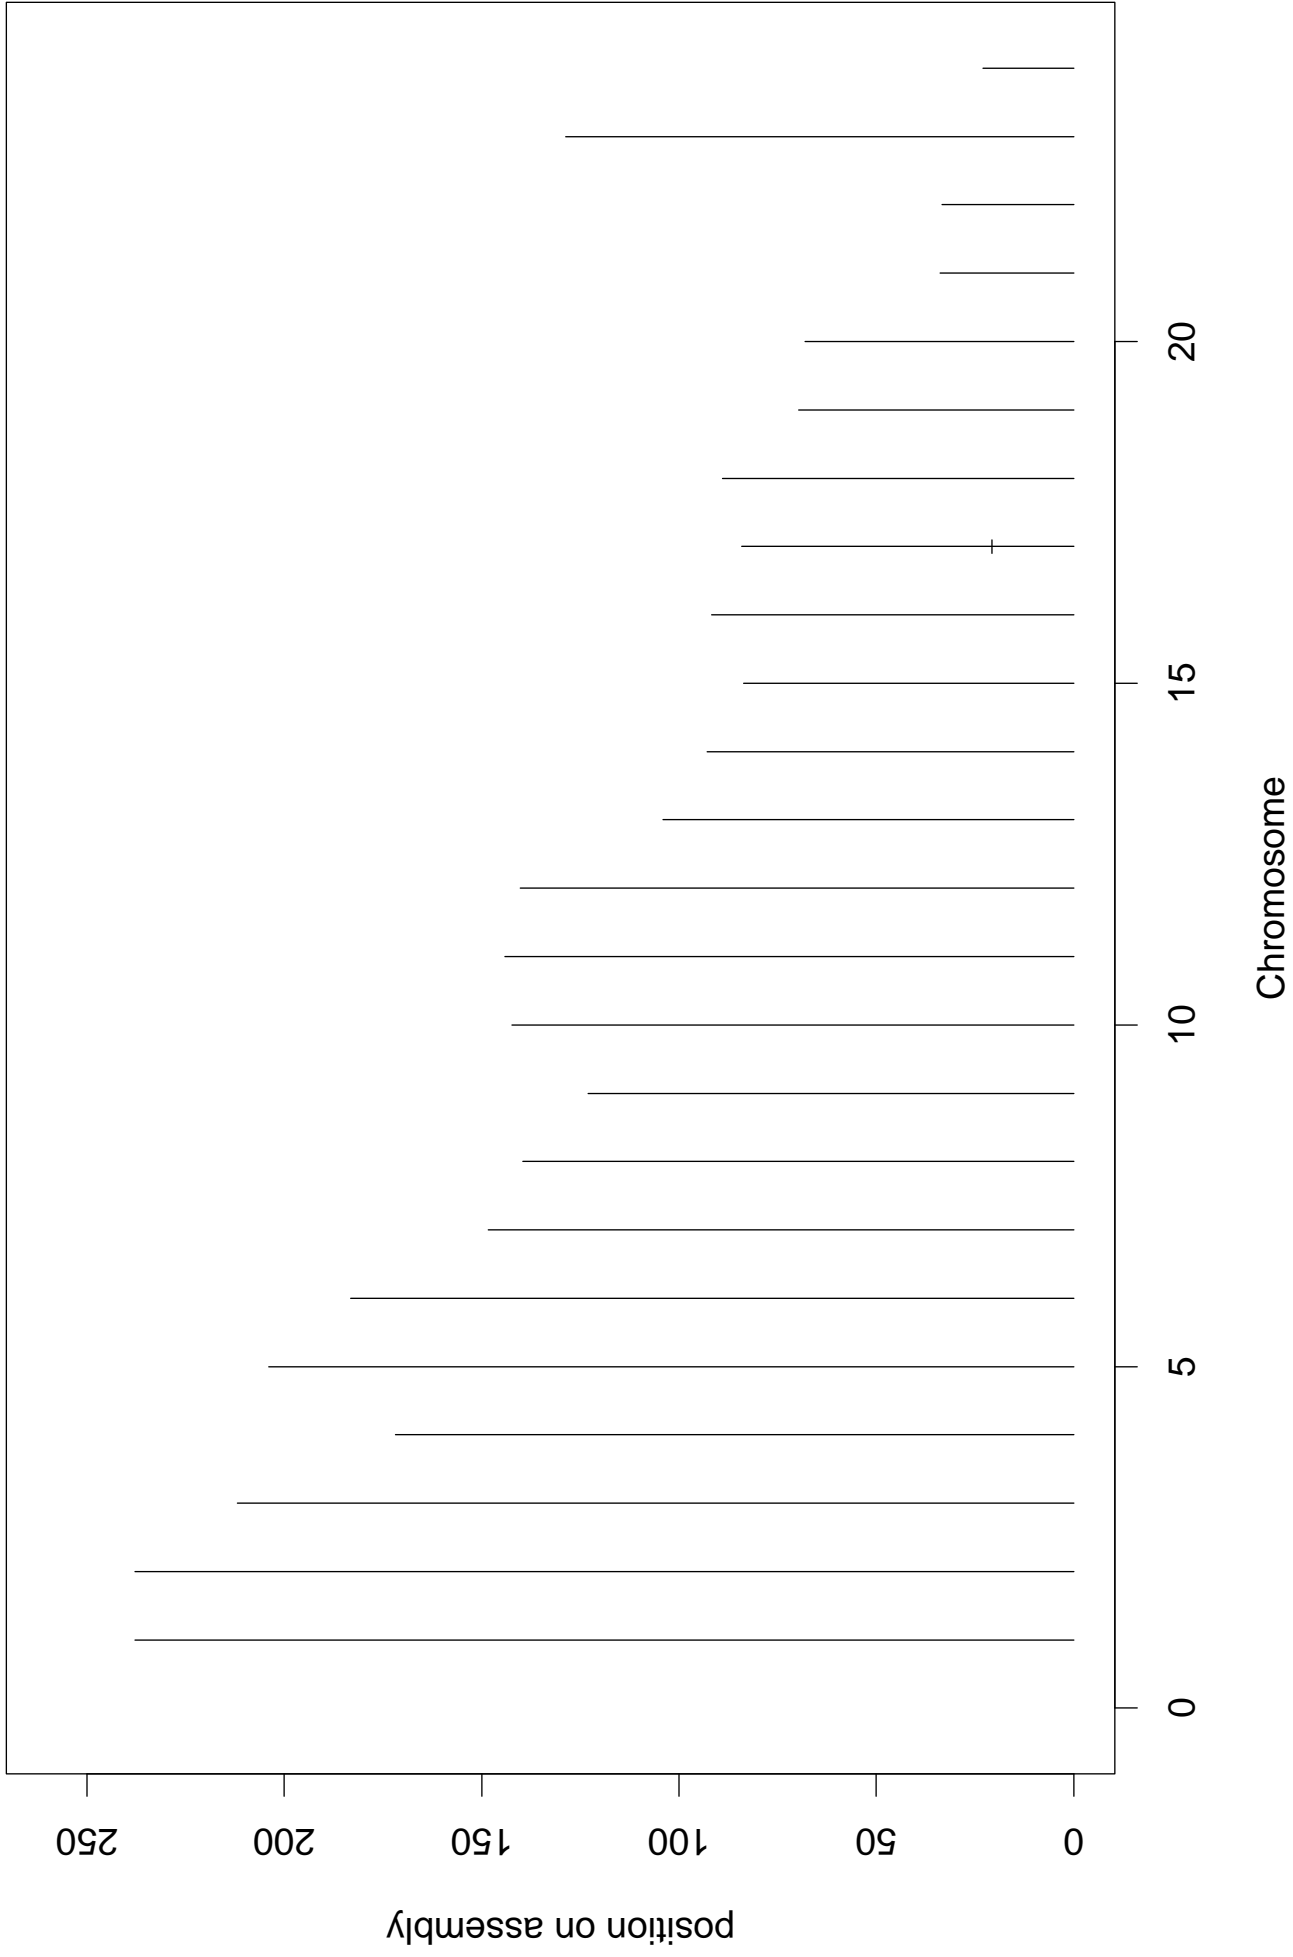

# gall bladder

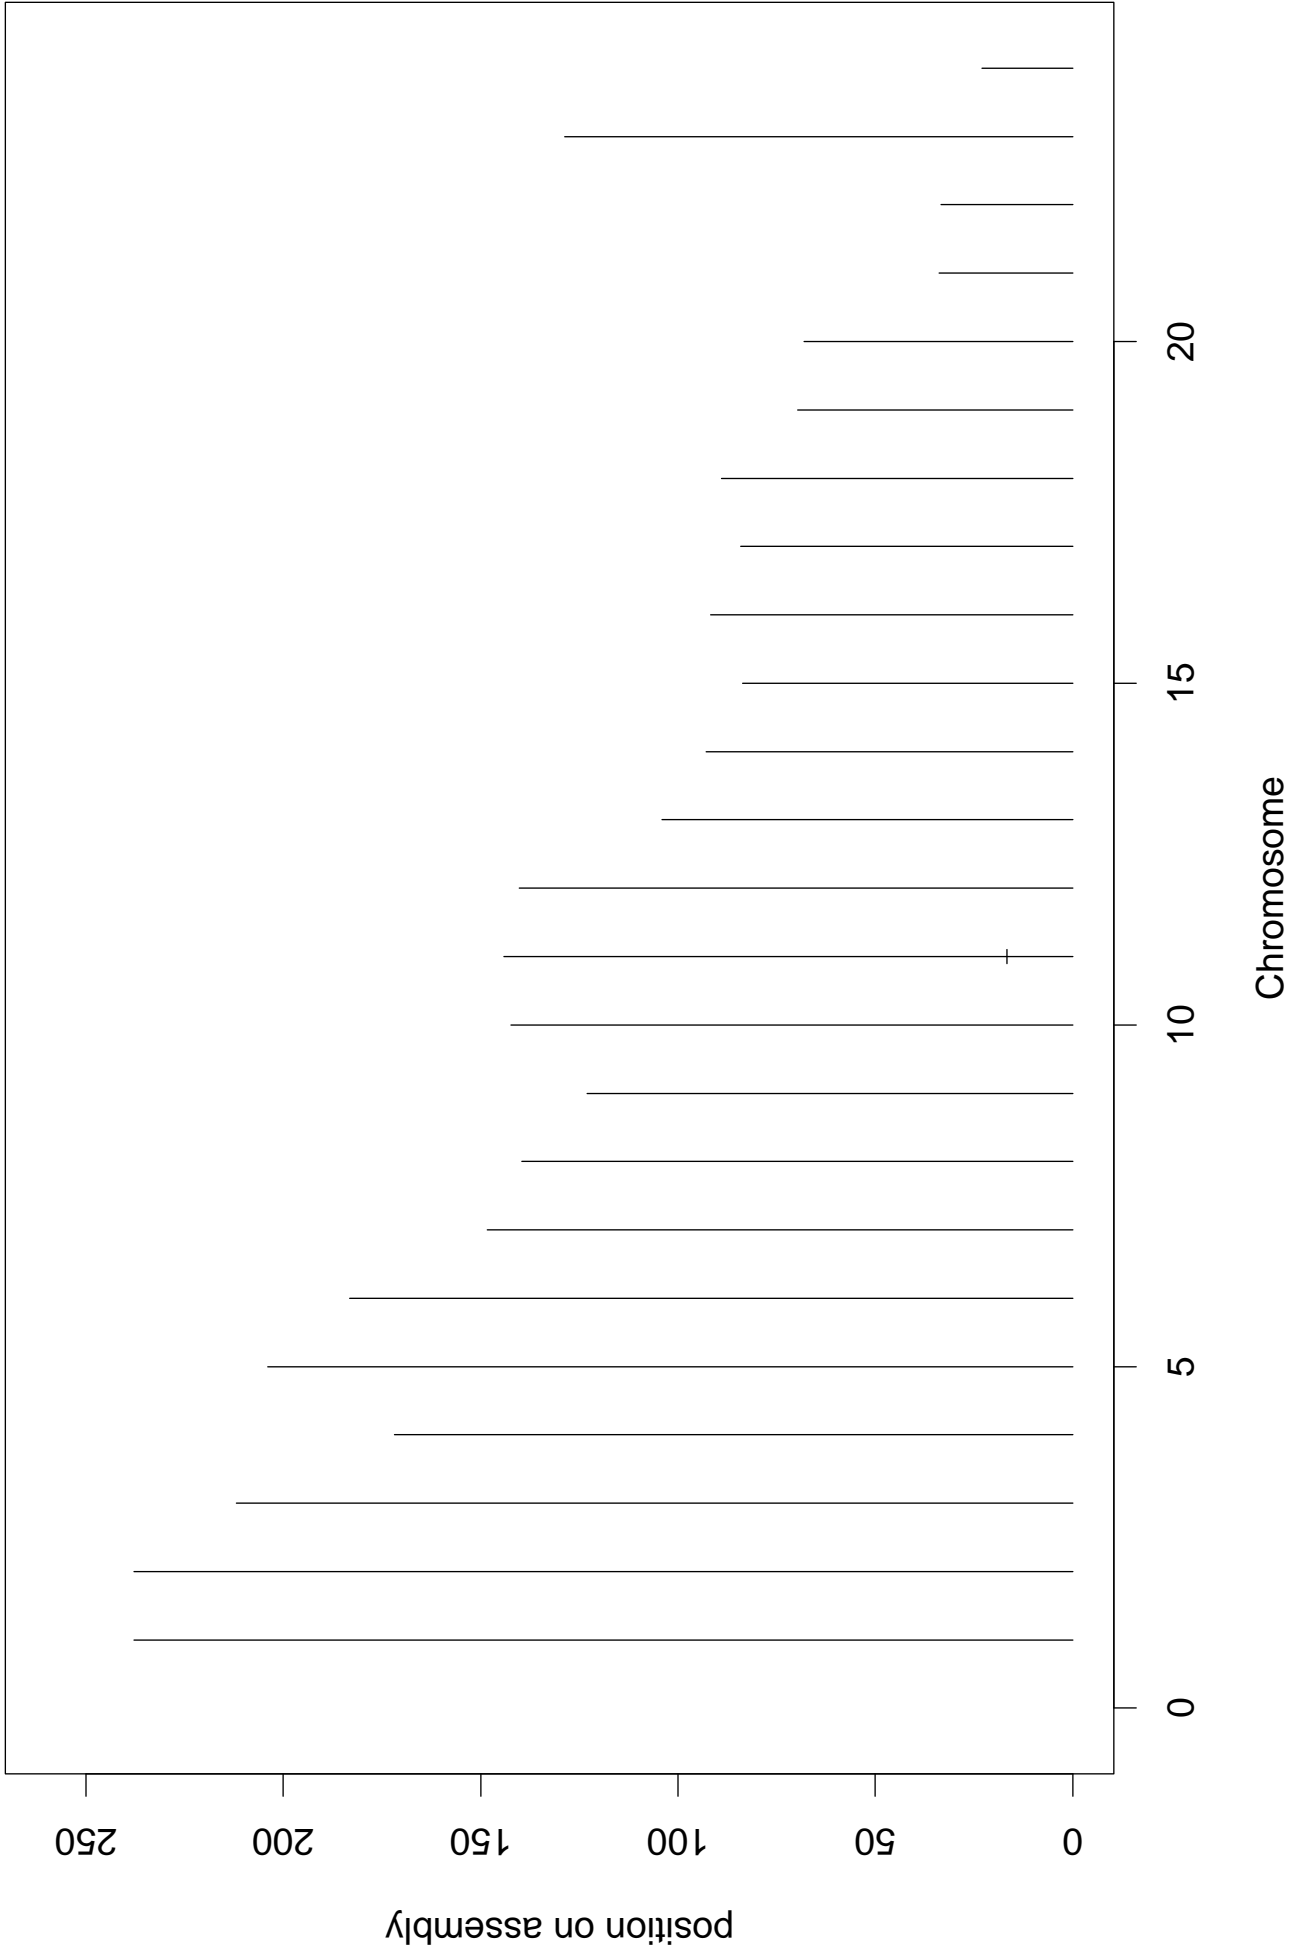

Supplement: gb-2001-2-7-research0025-S20.pdf [file gb-2001-2-7-research0025-S20.pdf]
