# Supplementary material
Source: PubMed Central journal article supplement (PMC55322)

# Chromosome 1

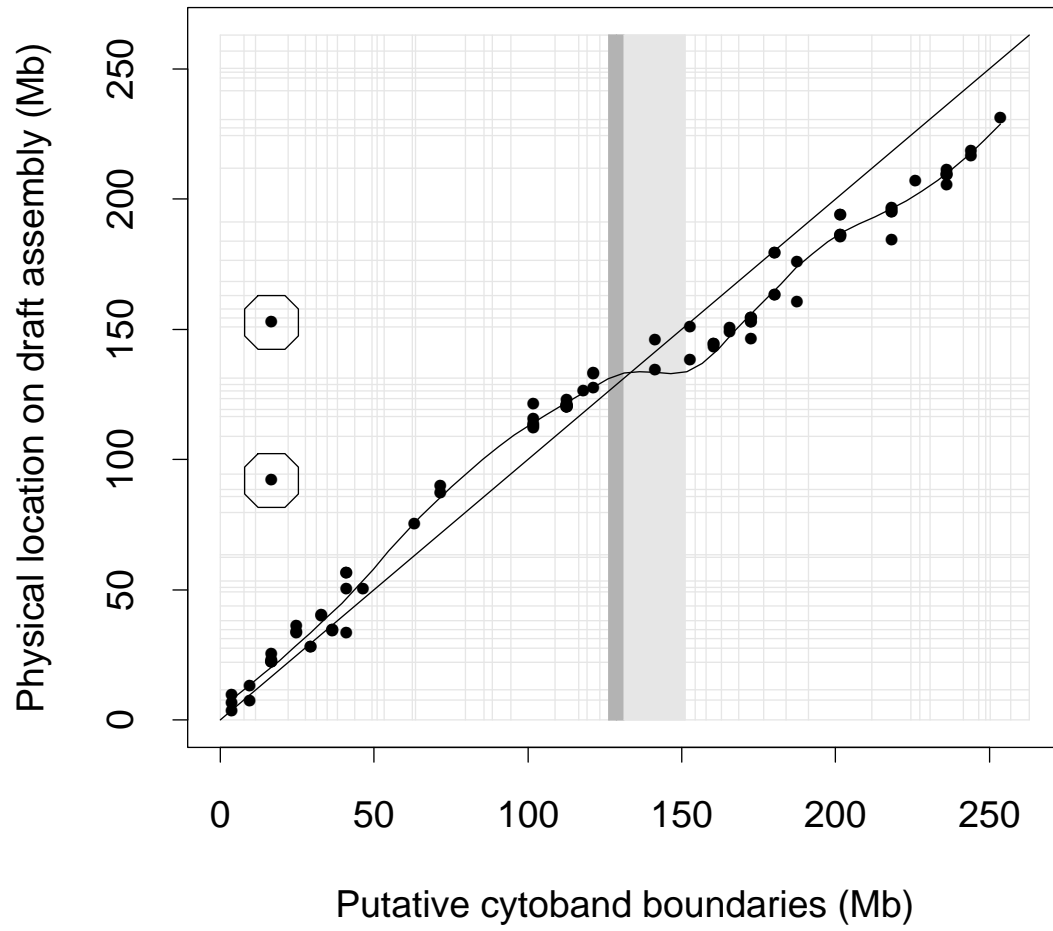

# Chromosome 2

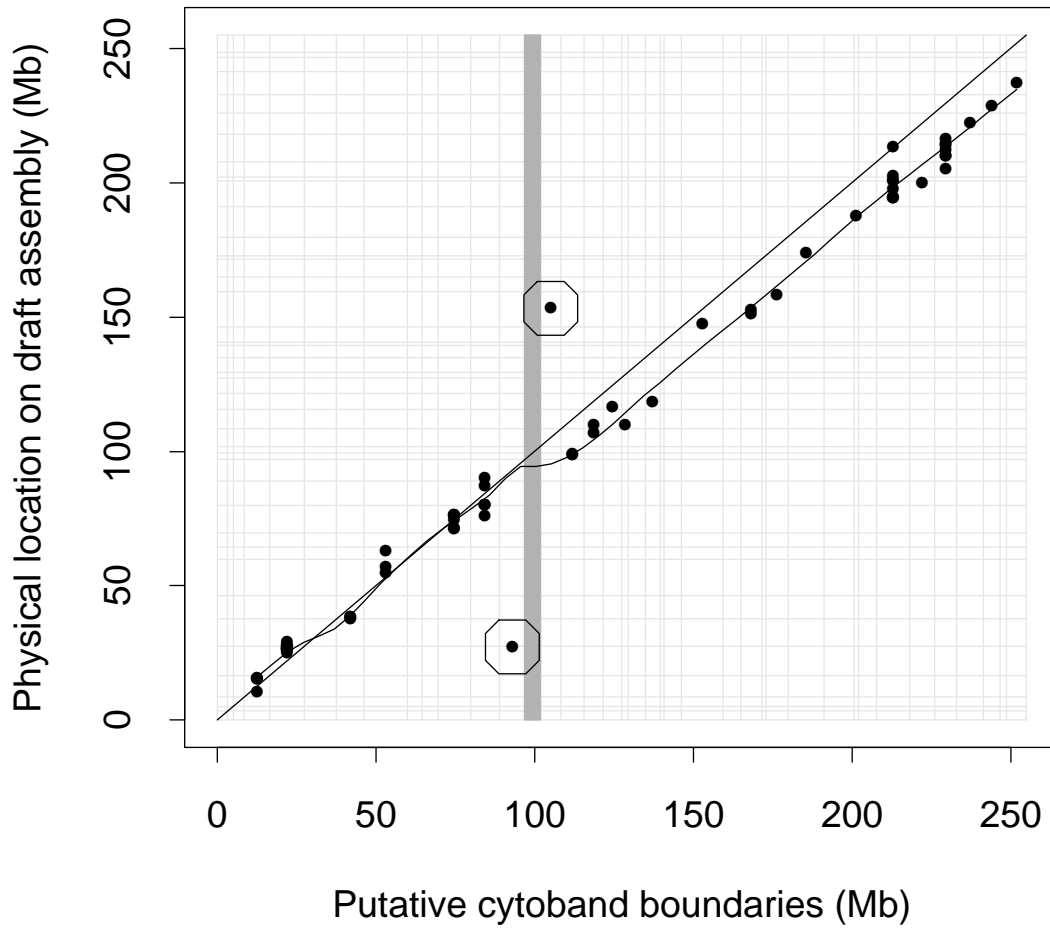

# Chromosome 3

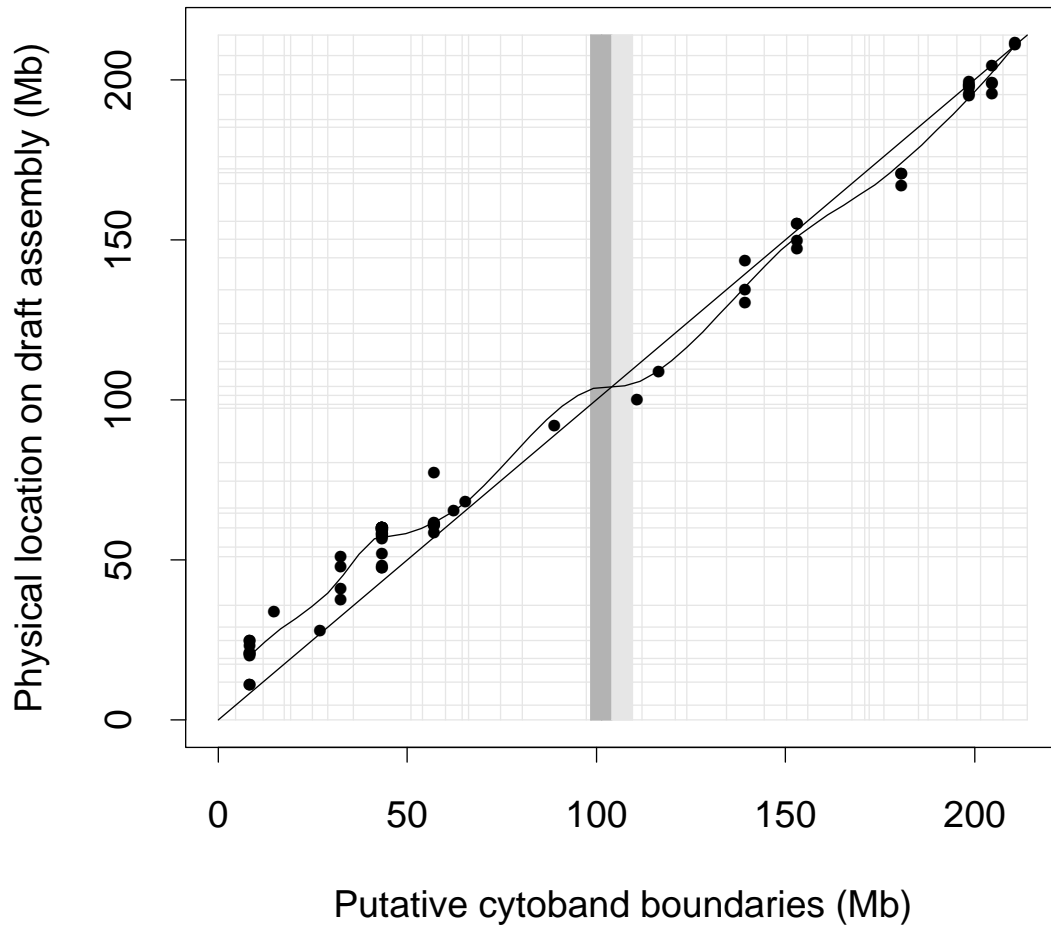

# Chromosome 4

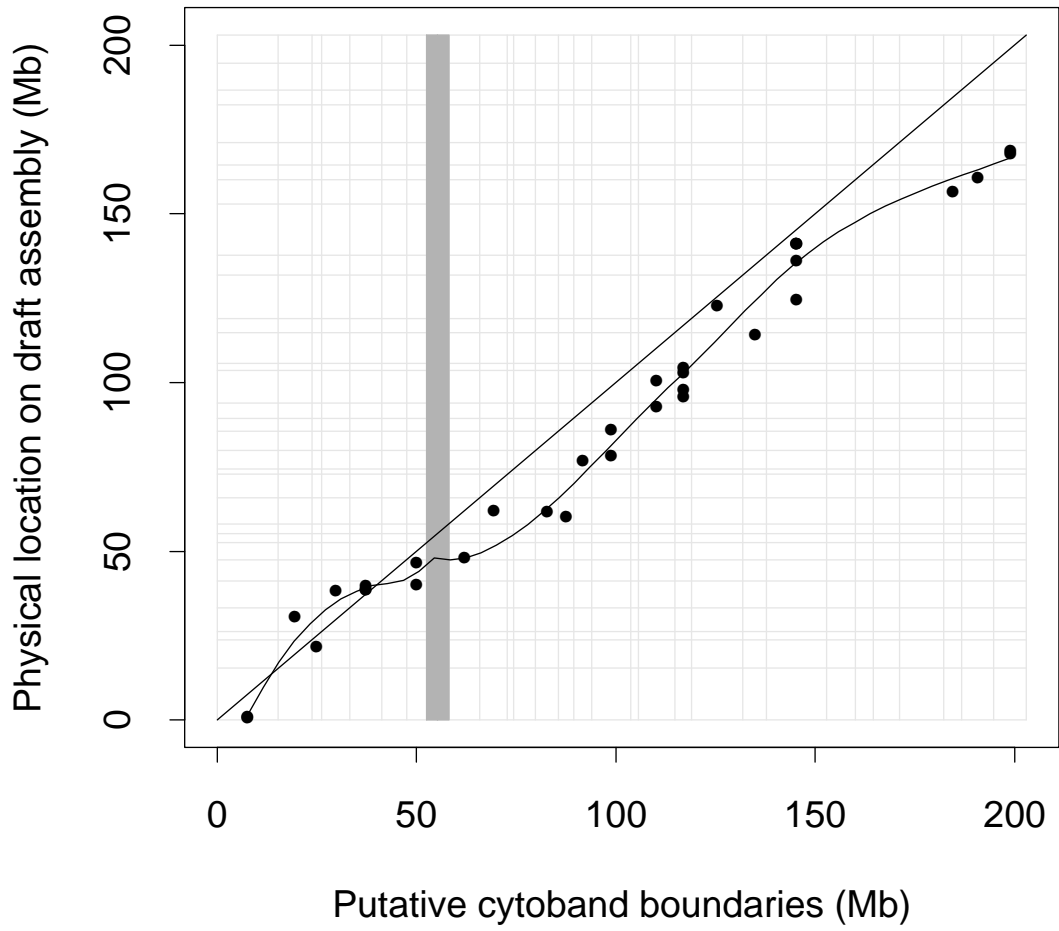

# Chromosome 5

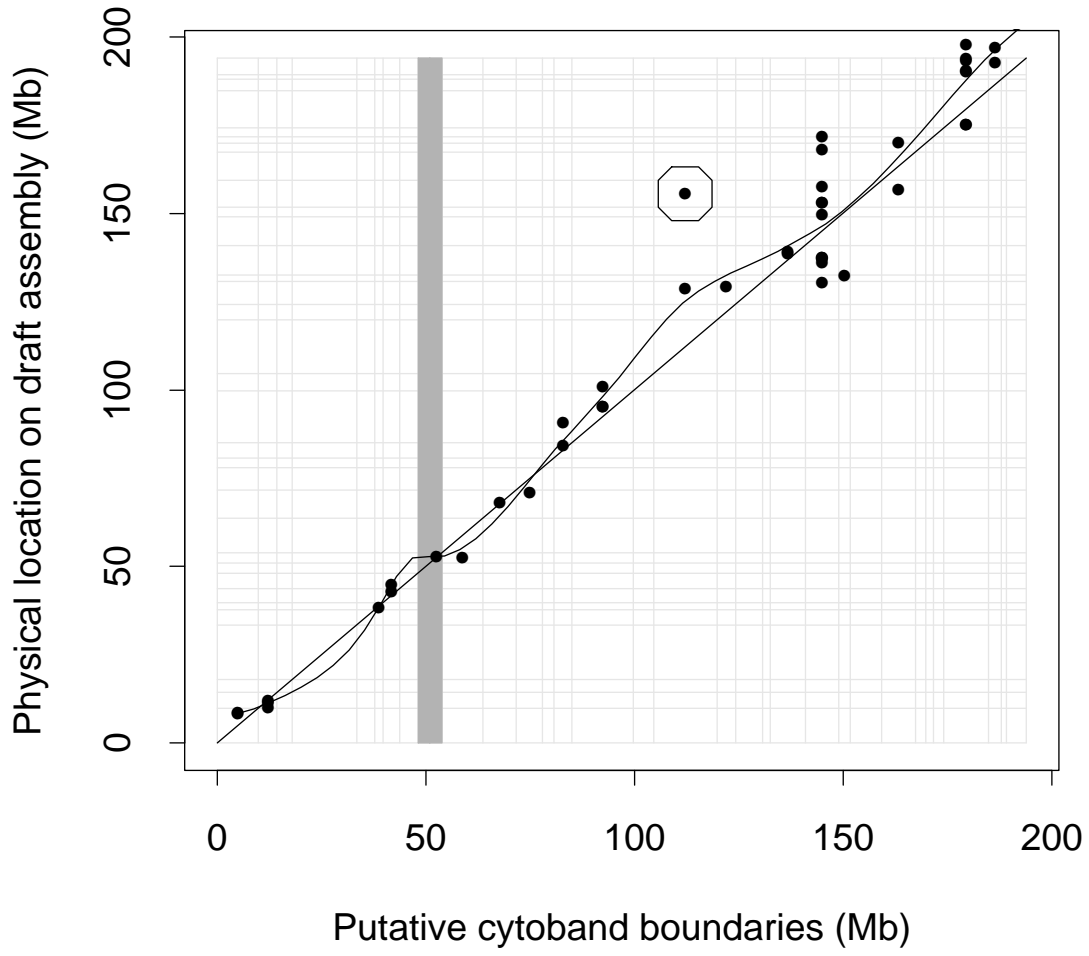

# Chromosome 6

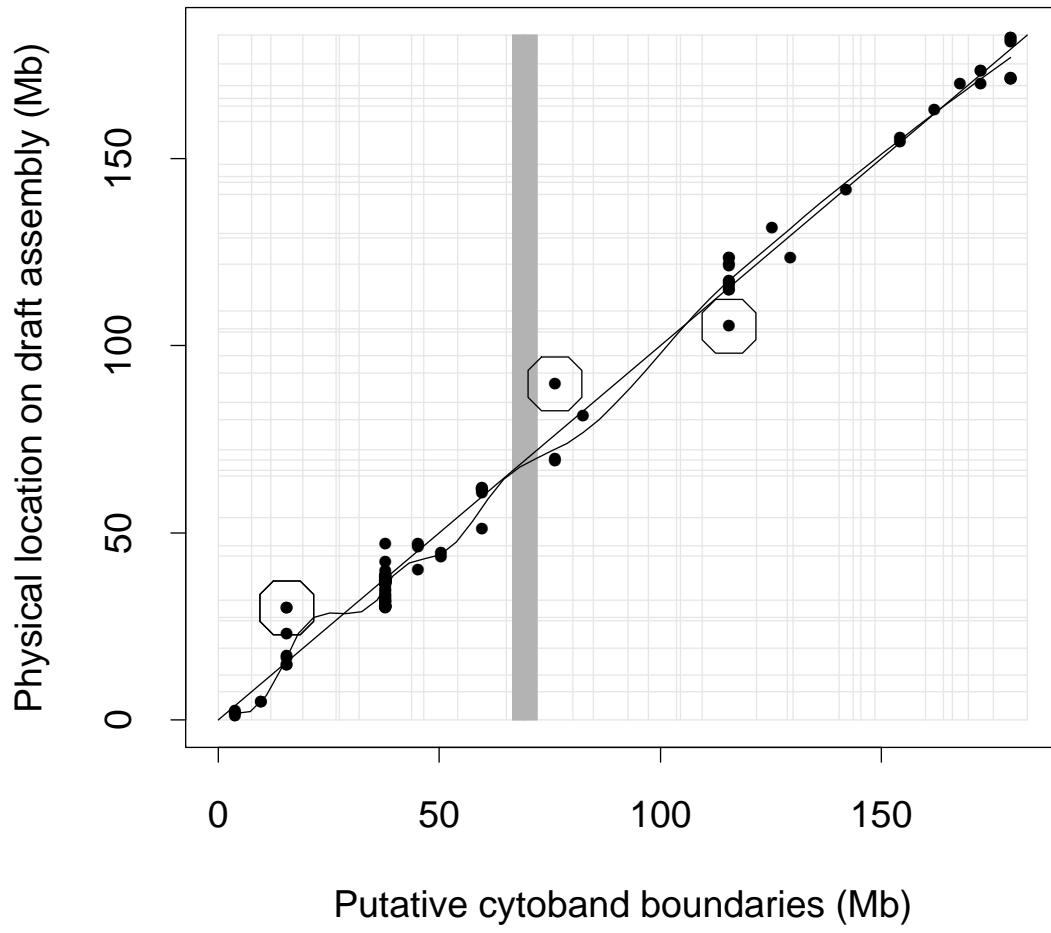

# Chromosome 7

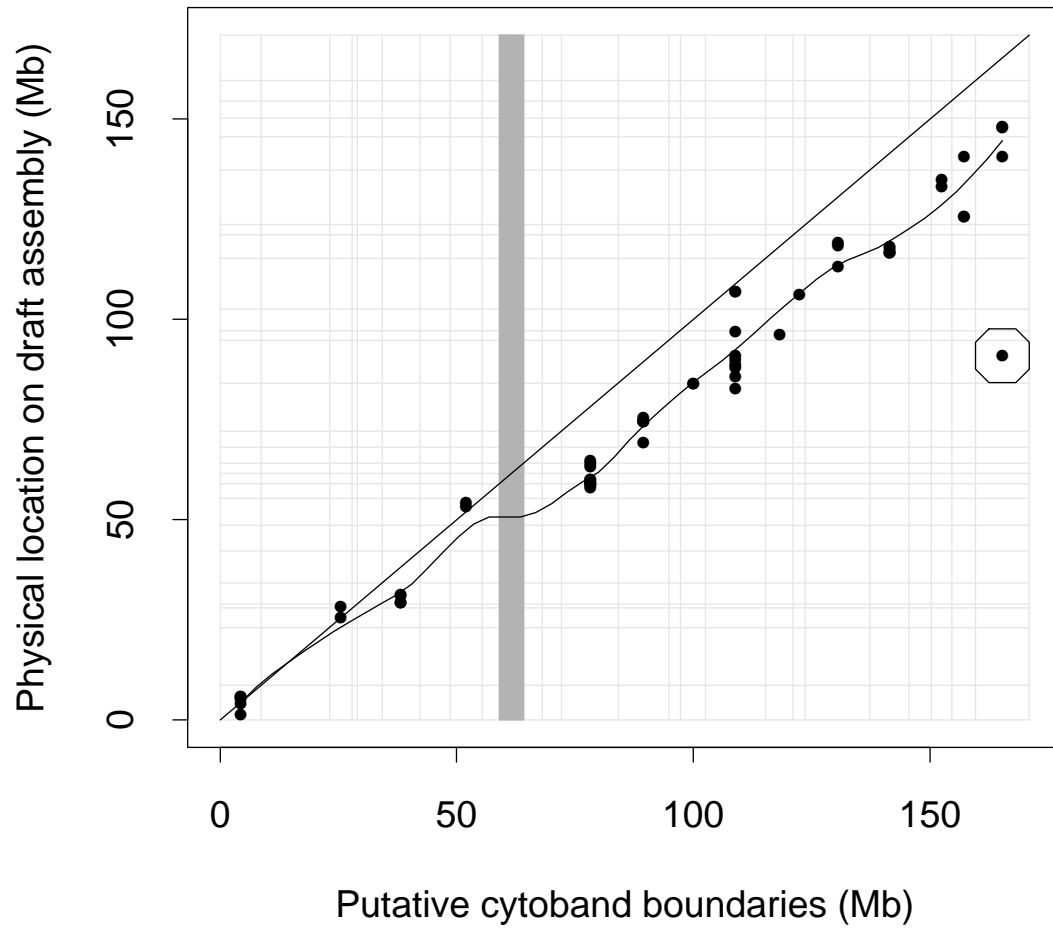

# Chromosome 8

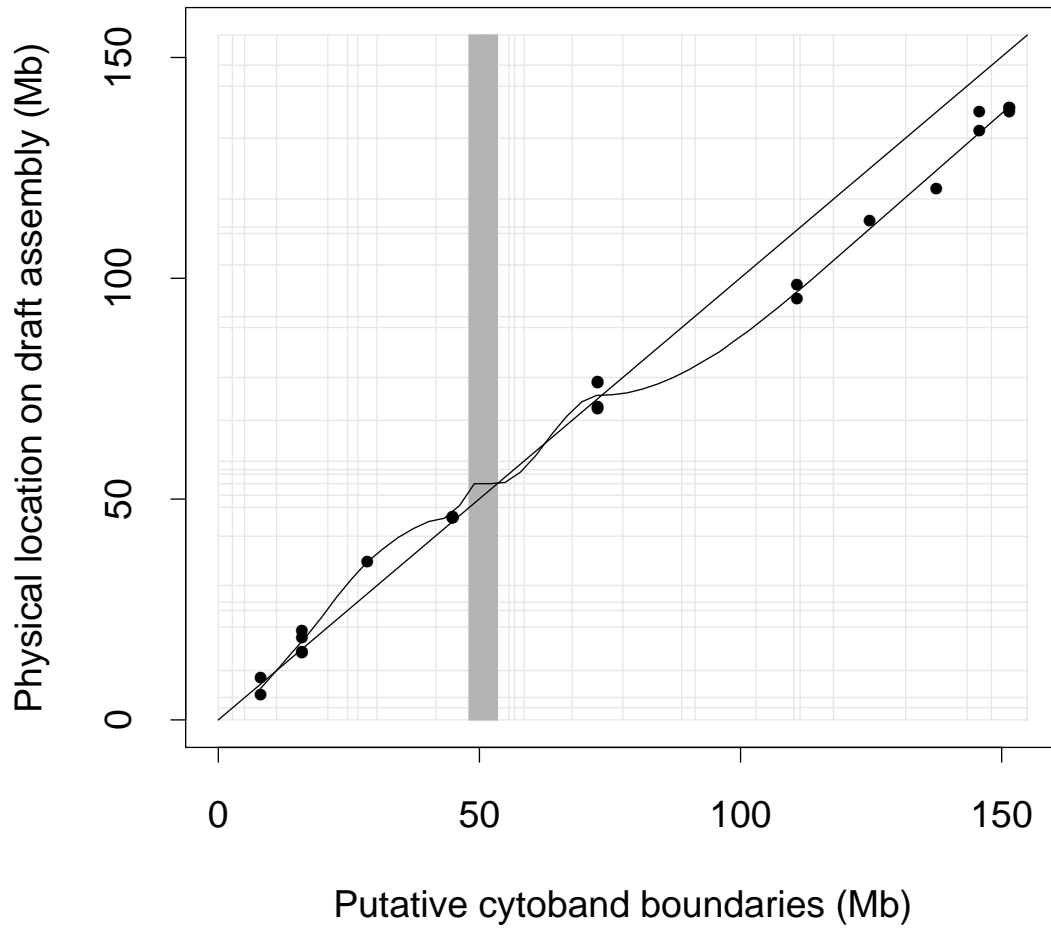



# Chromosome 9

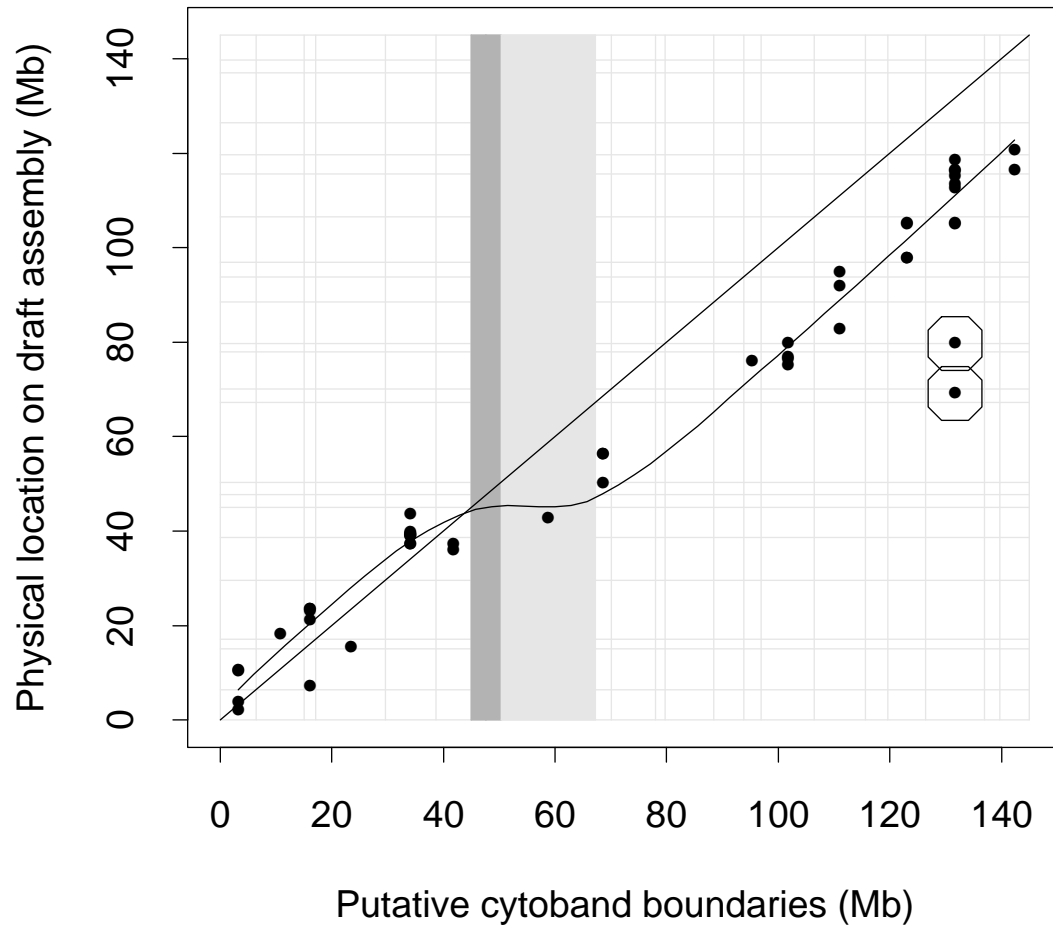

# Chromosome 10

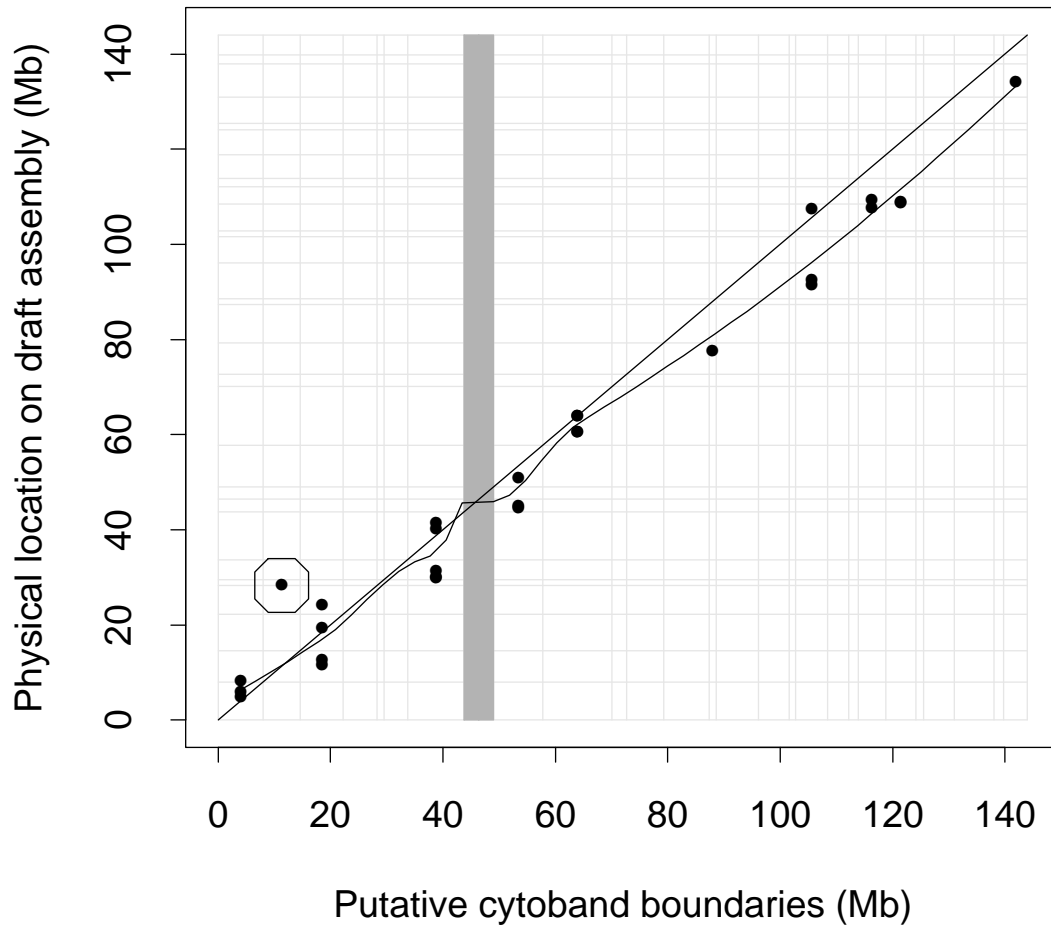

# Chromosome 11

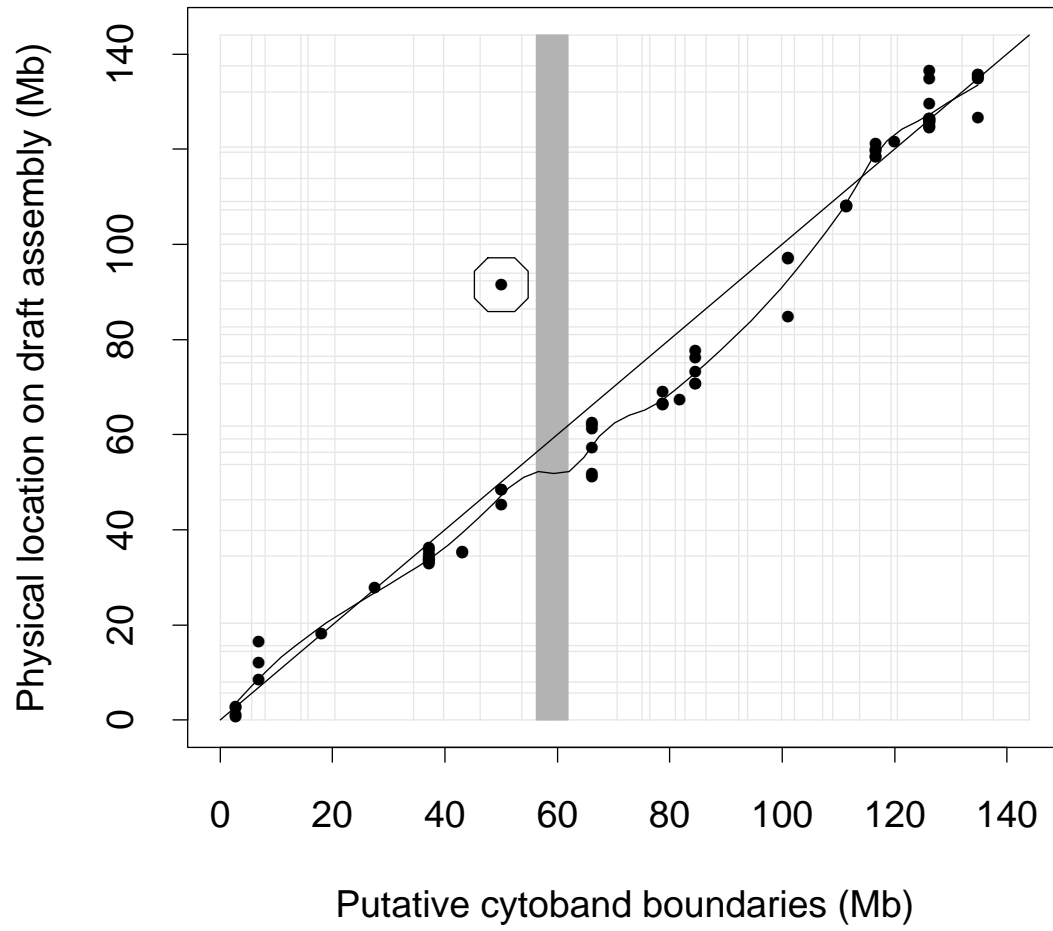

# Chromosome 12

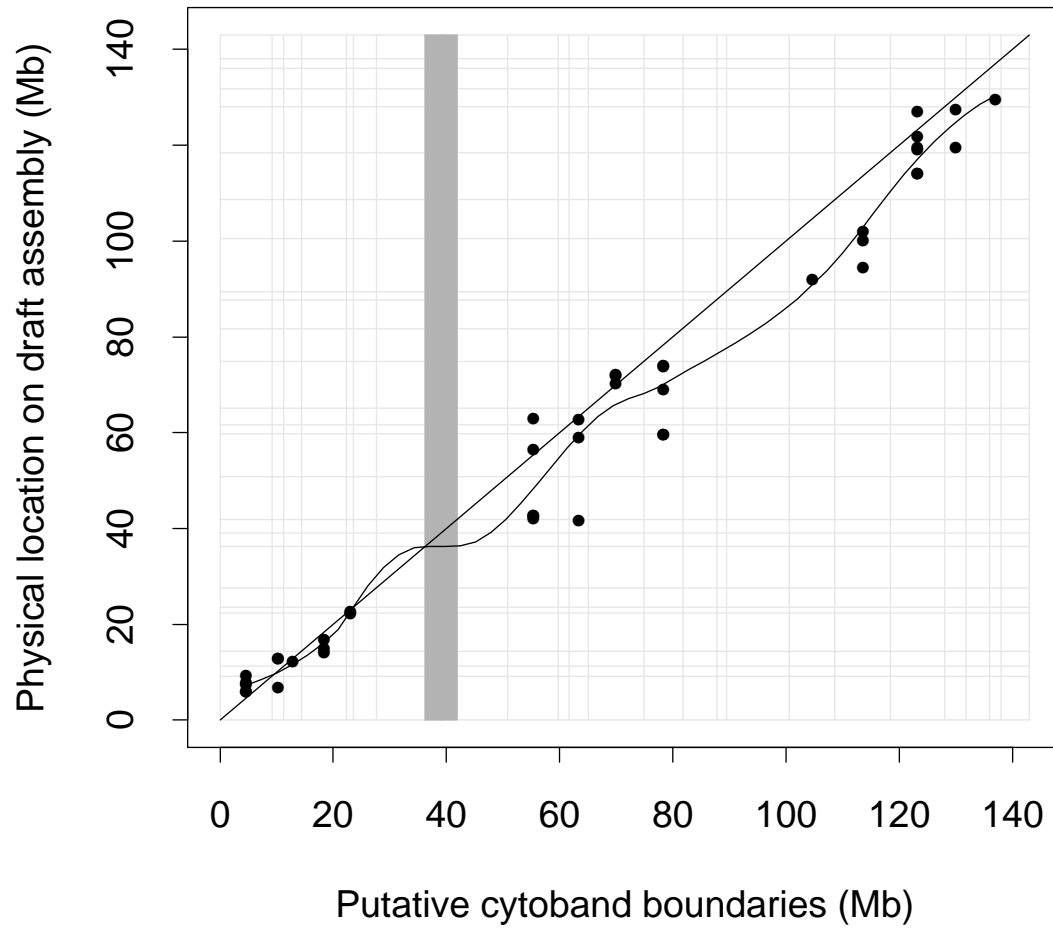

# Chromosome 13

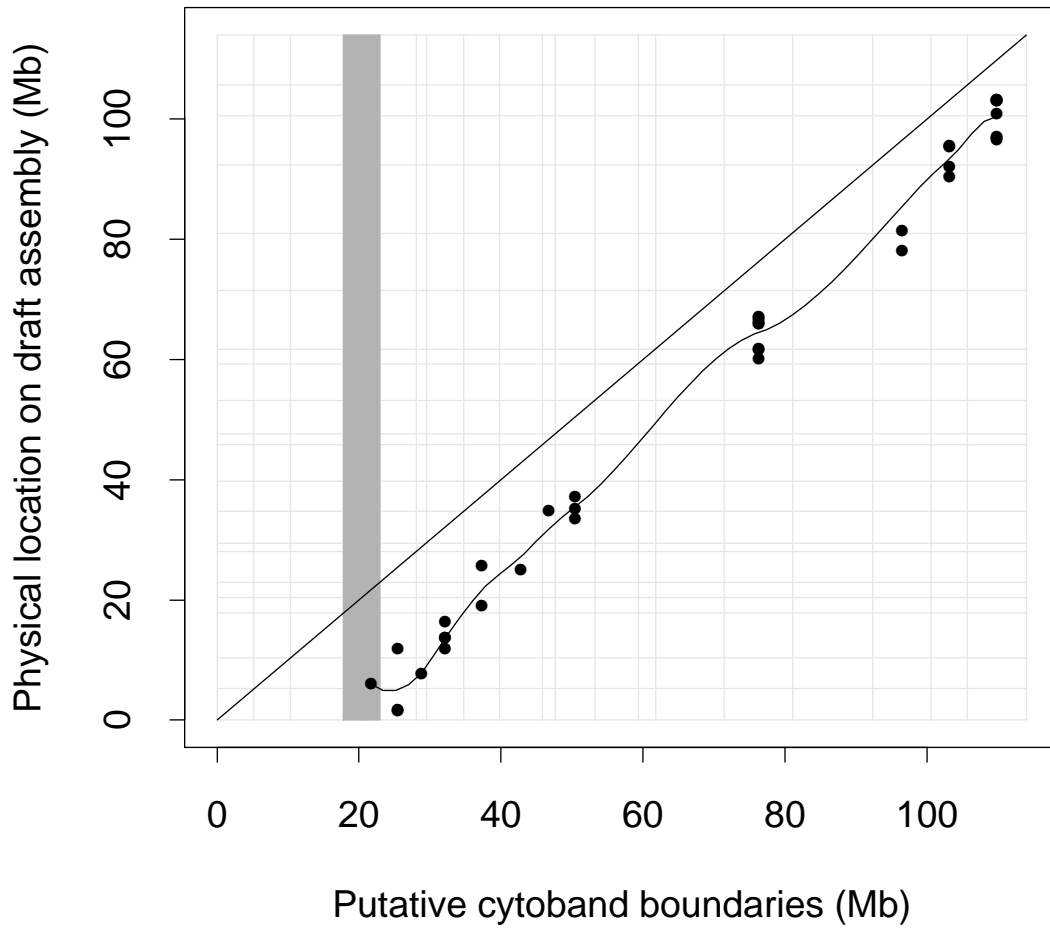

# Chromosome 14

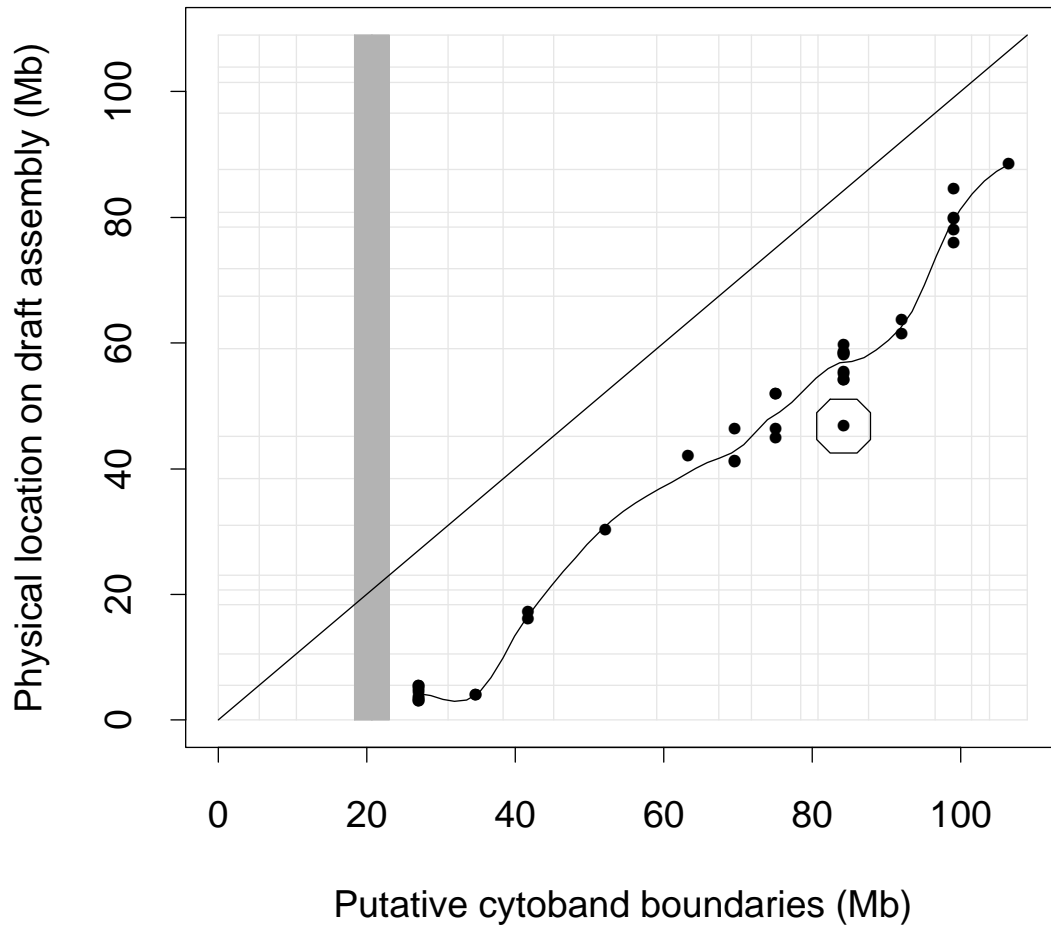

# Chromosome 15

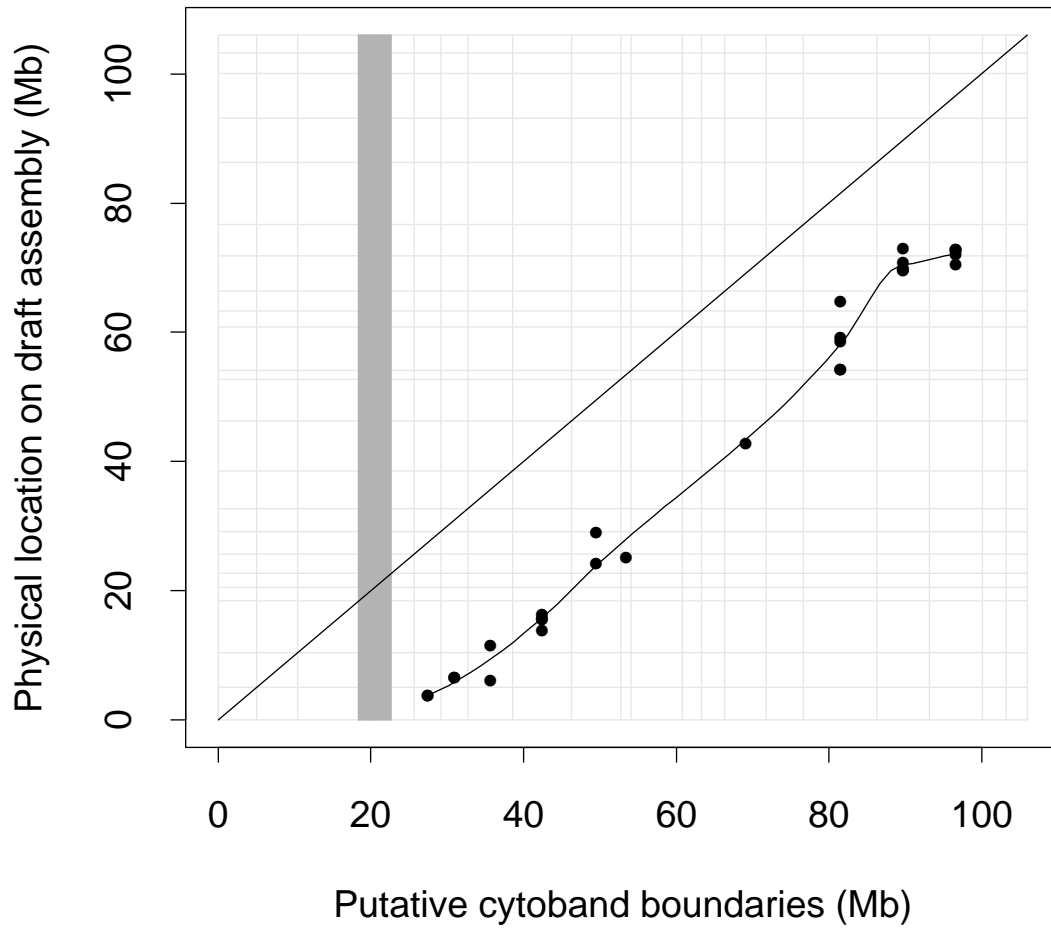

# Chromosome 16

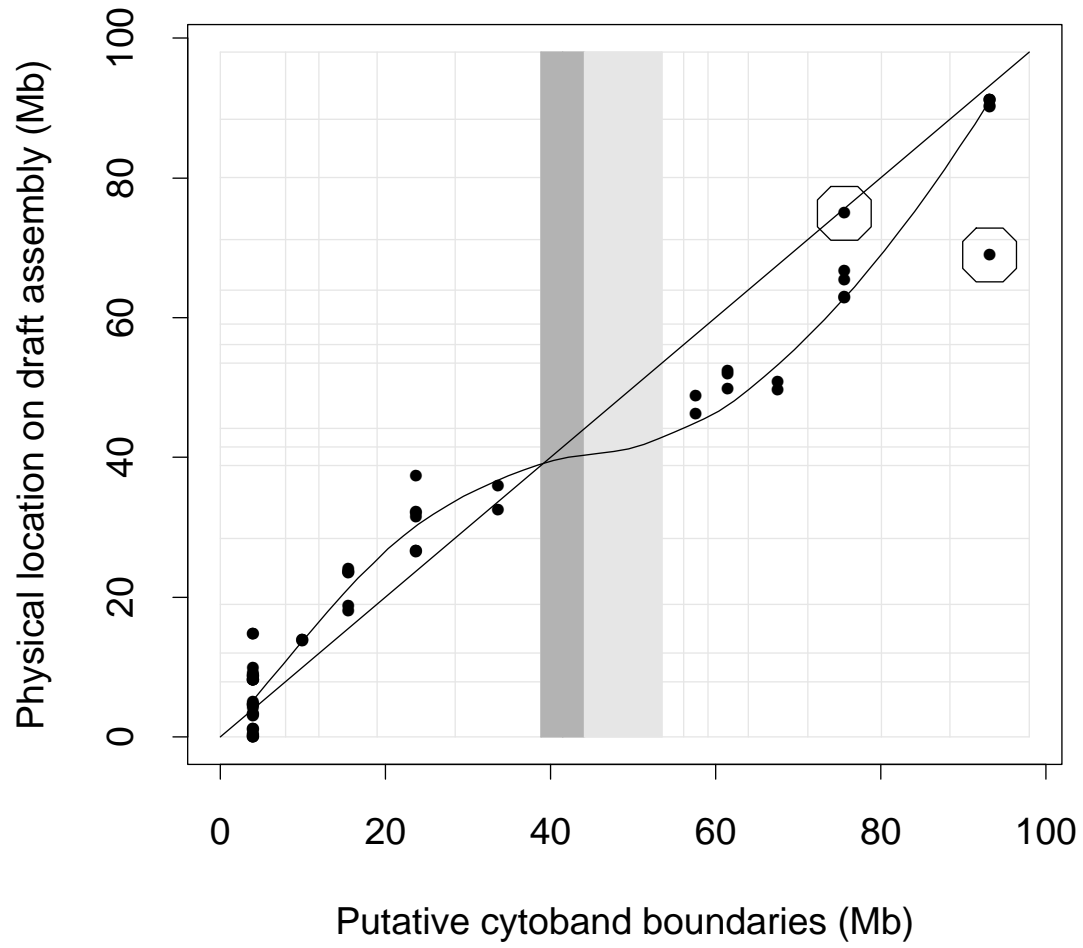



# Chromosome 17

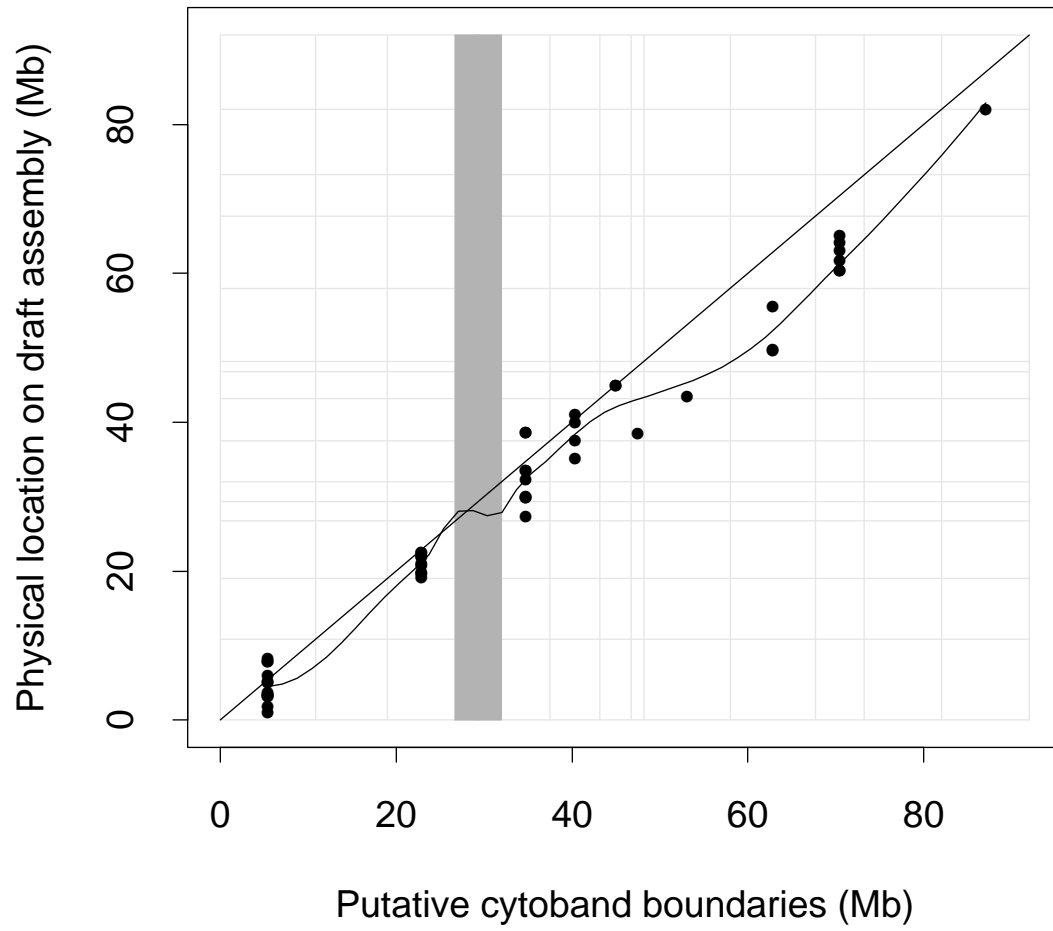

# Chromosome 18

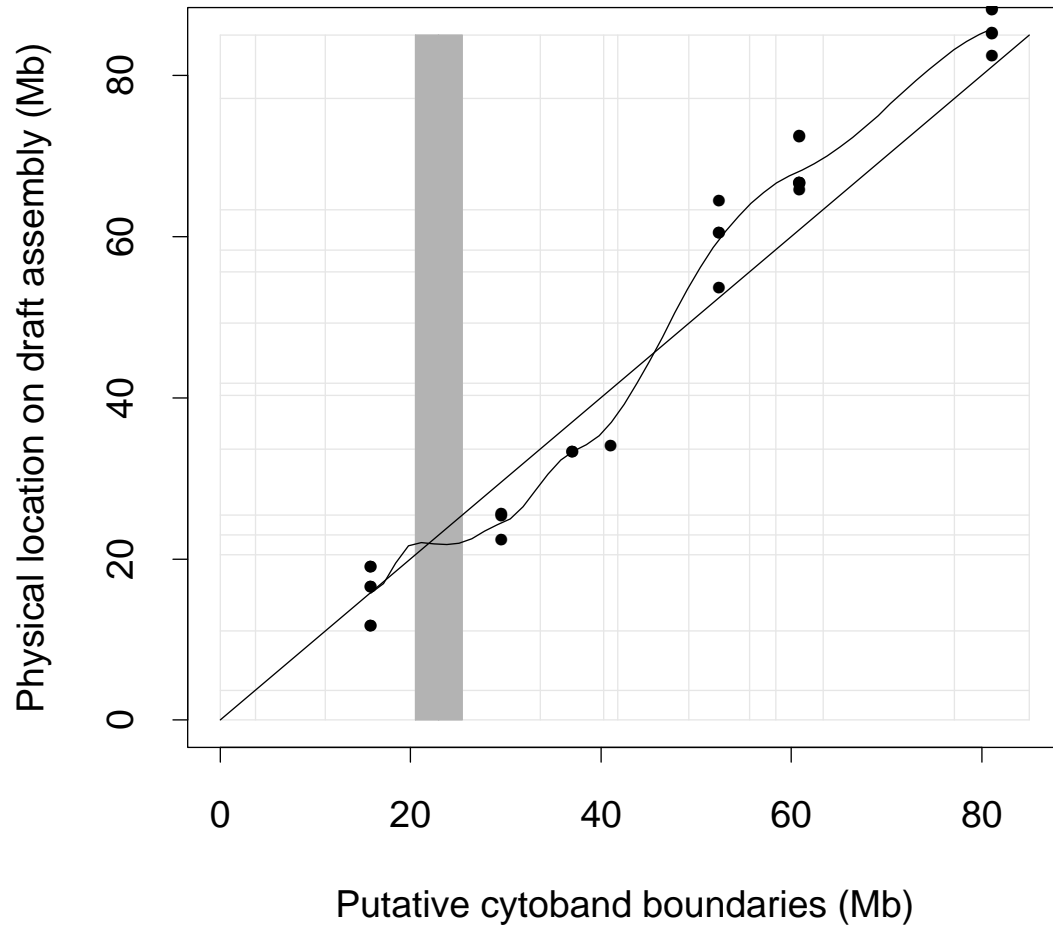

# Chromosome 20

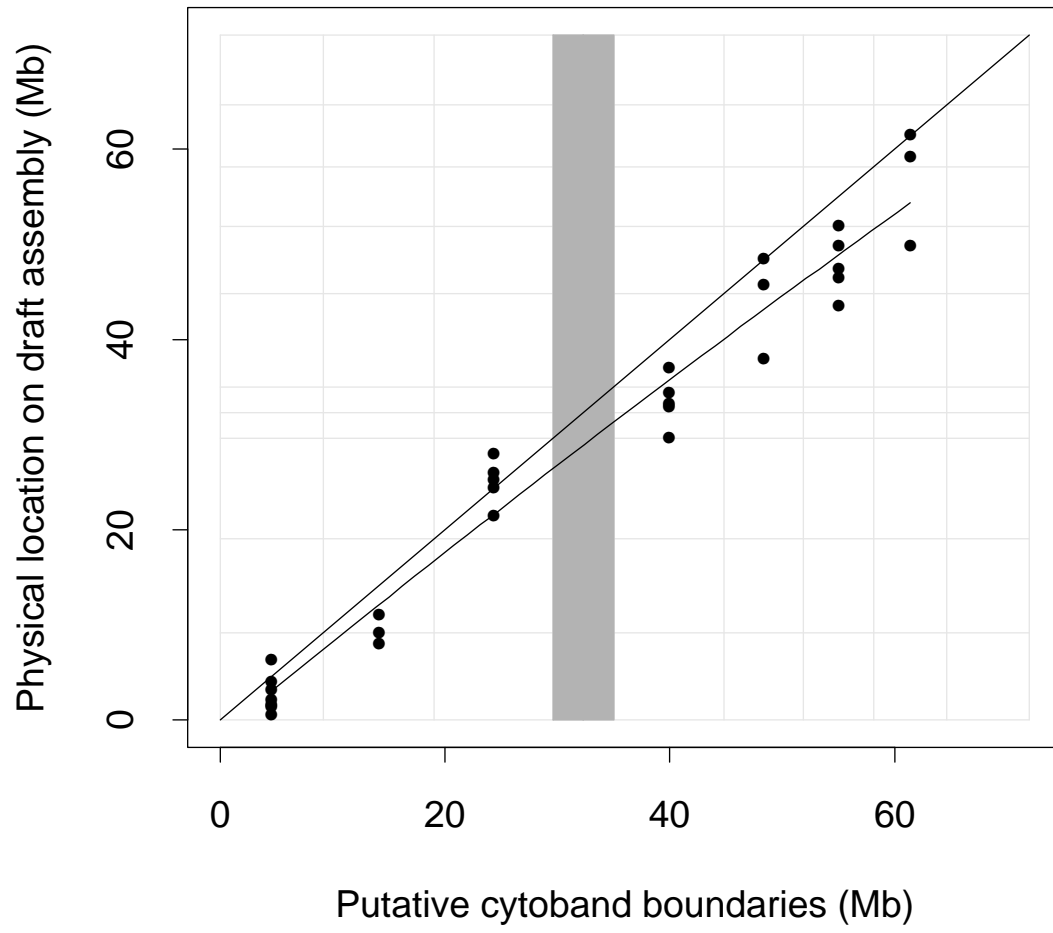

Supplement: gb-2001-2-7-research0025-S49.pdf [file gb-2001-2-7-research0025-S49.pdf]
