# Supplementary material
Source: PubMed Central journal article supplement (PMC55322)

# Chrom 1

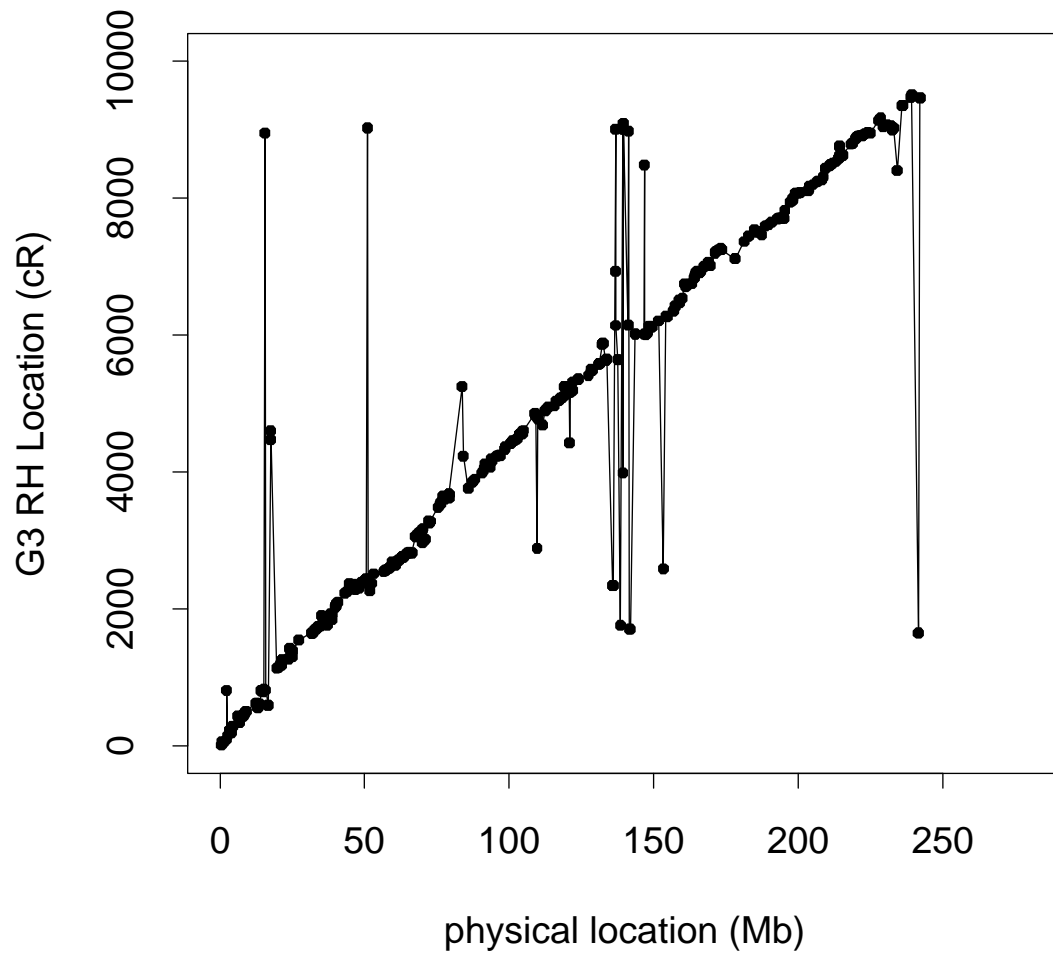

# Chrom 2

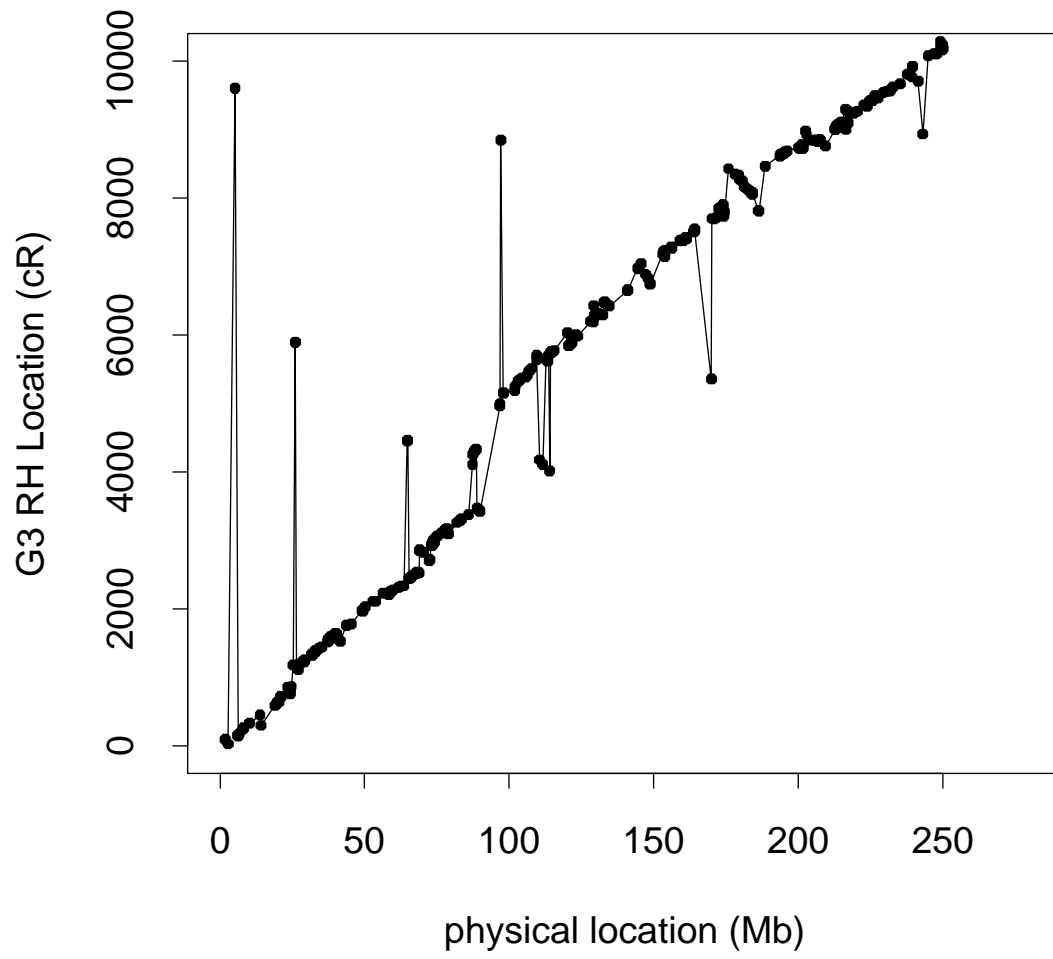

# Chrom 3

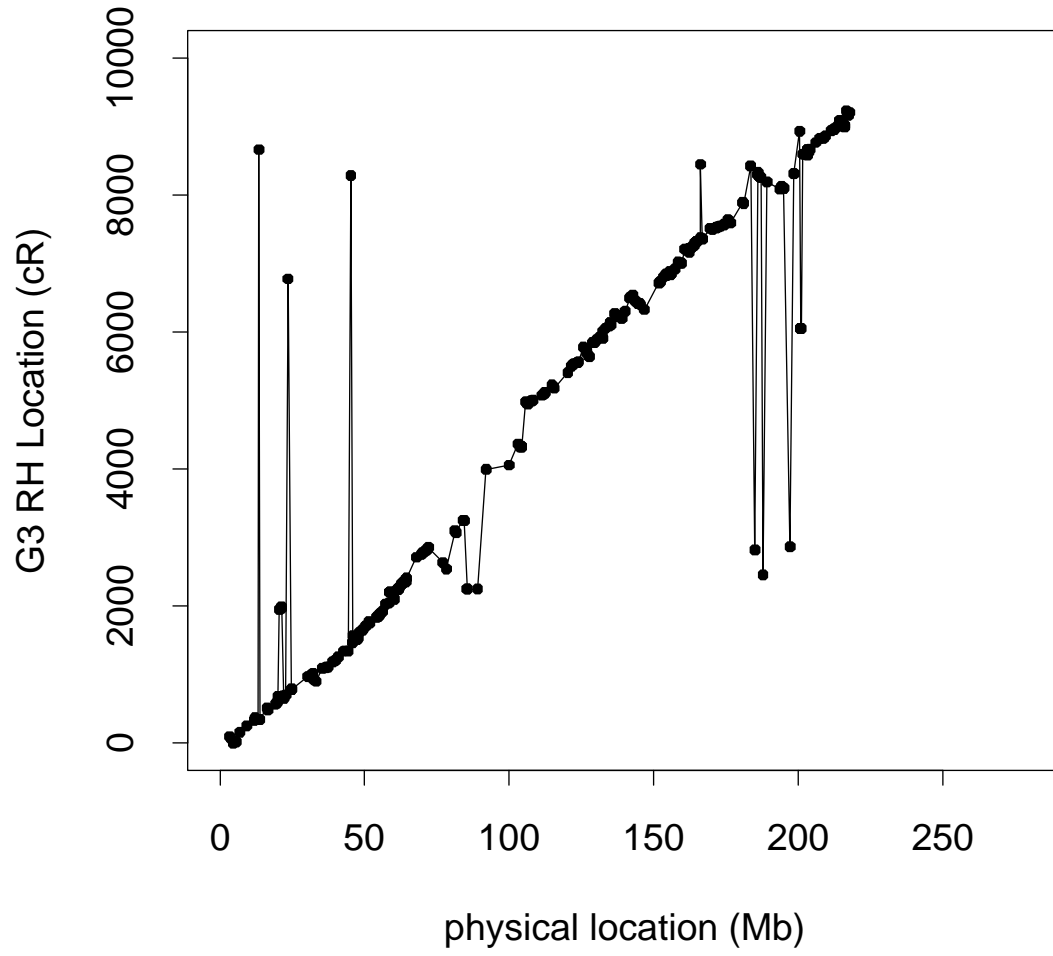

# Chrom 4

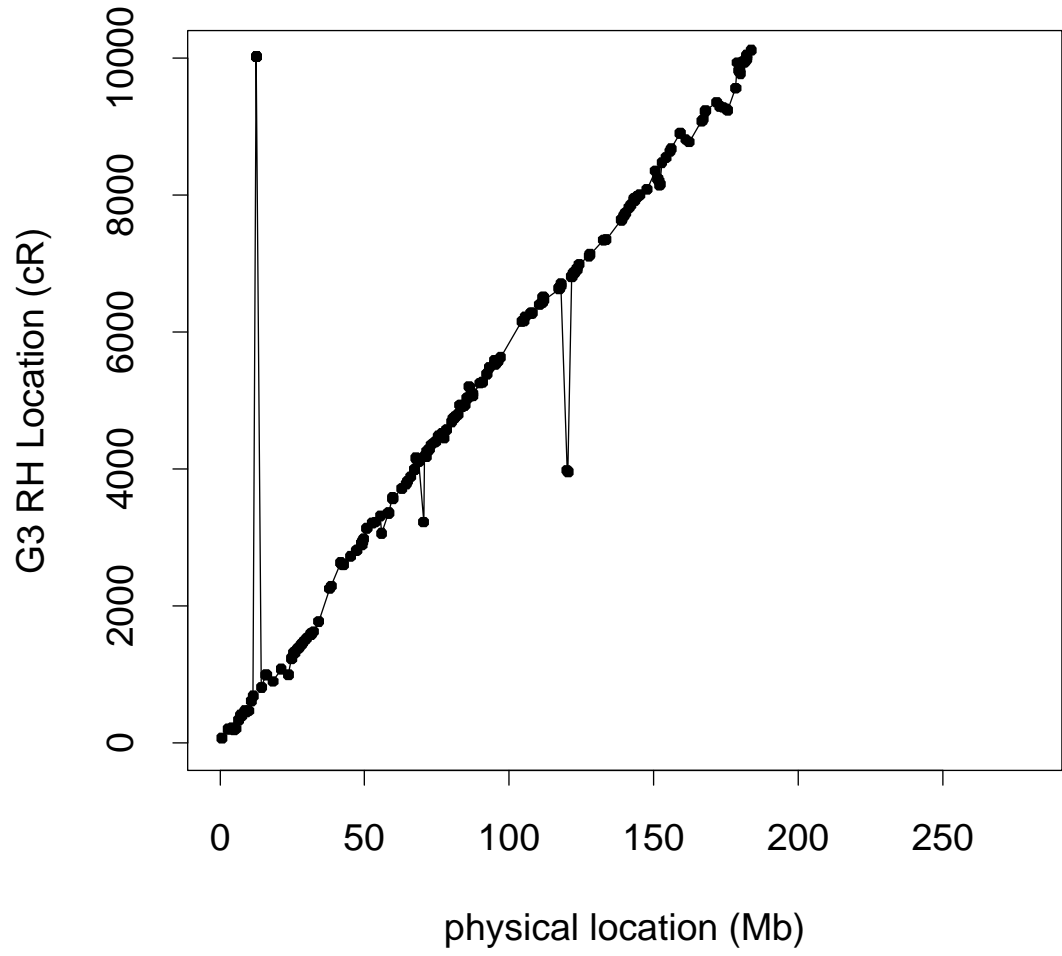

# Chrom 5

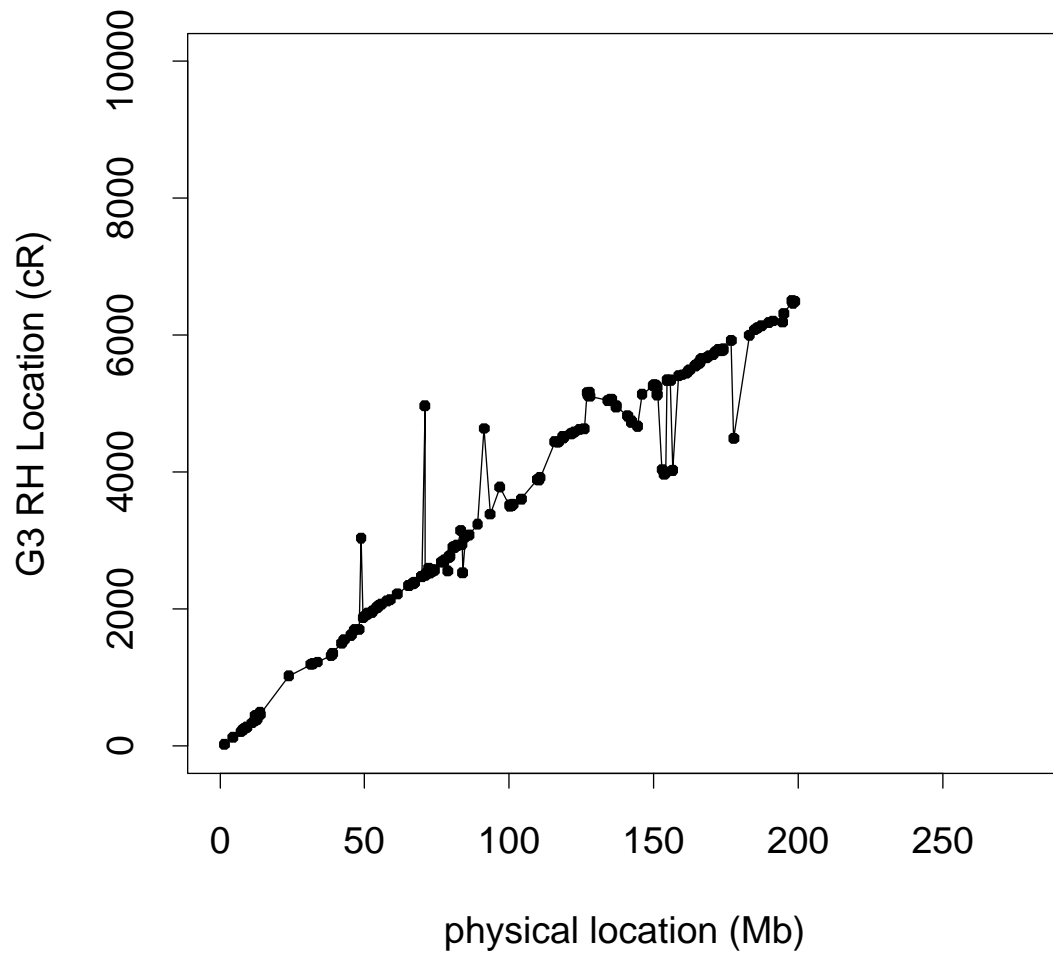

# Chrom 6

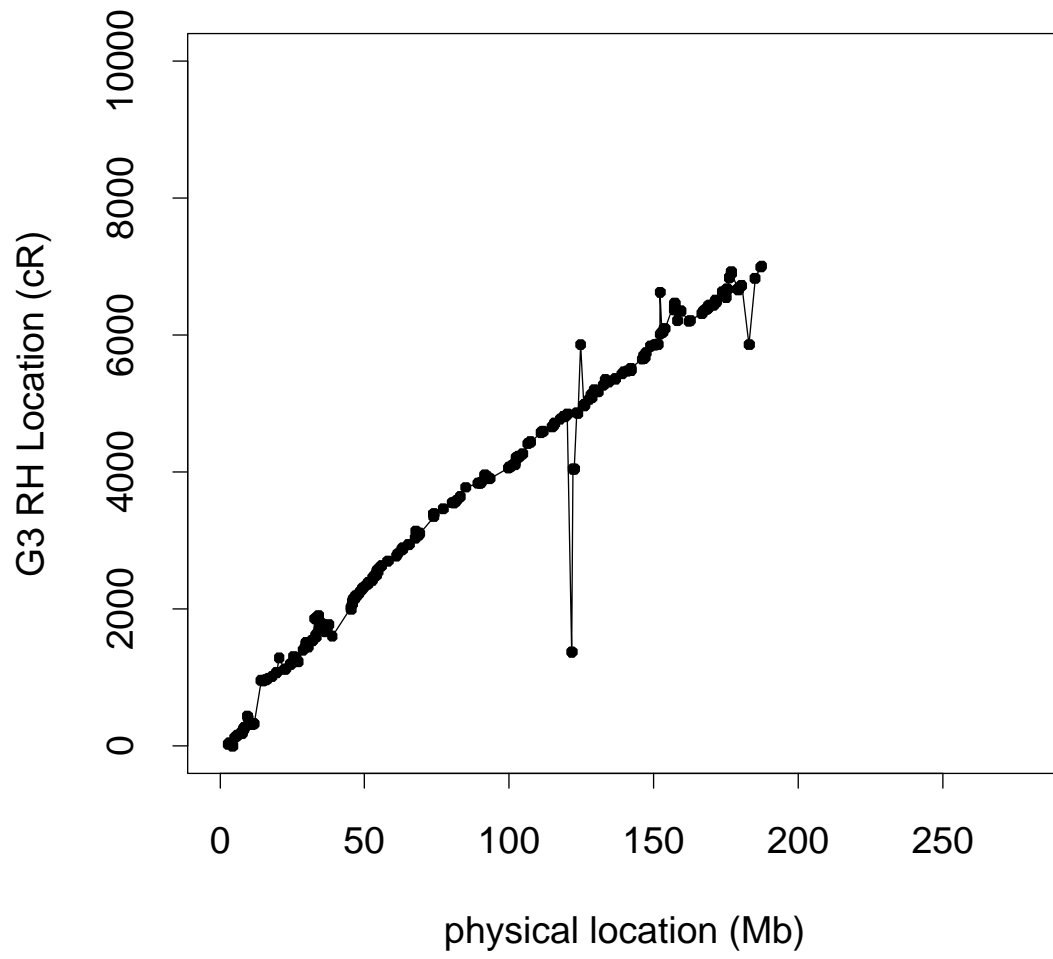

# Chrom 7

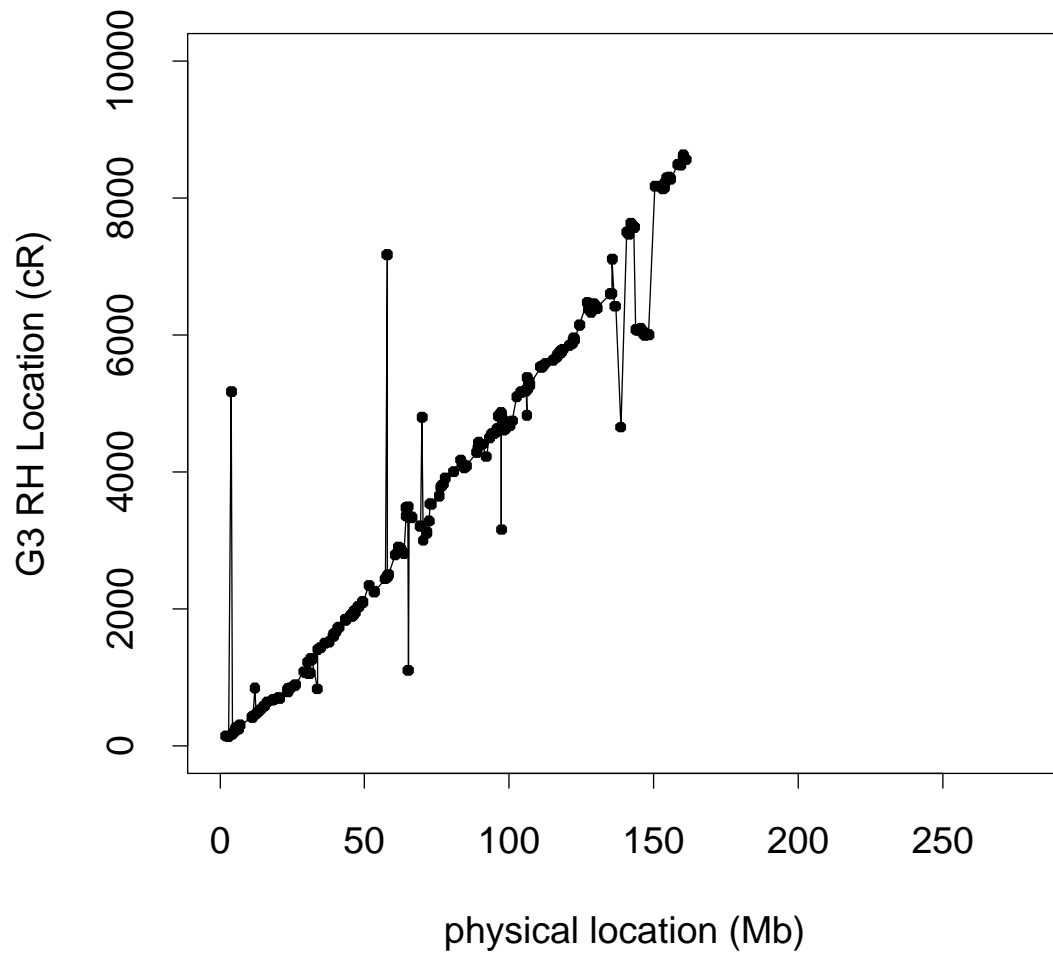

# Chrom 8

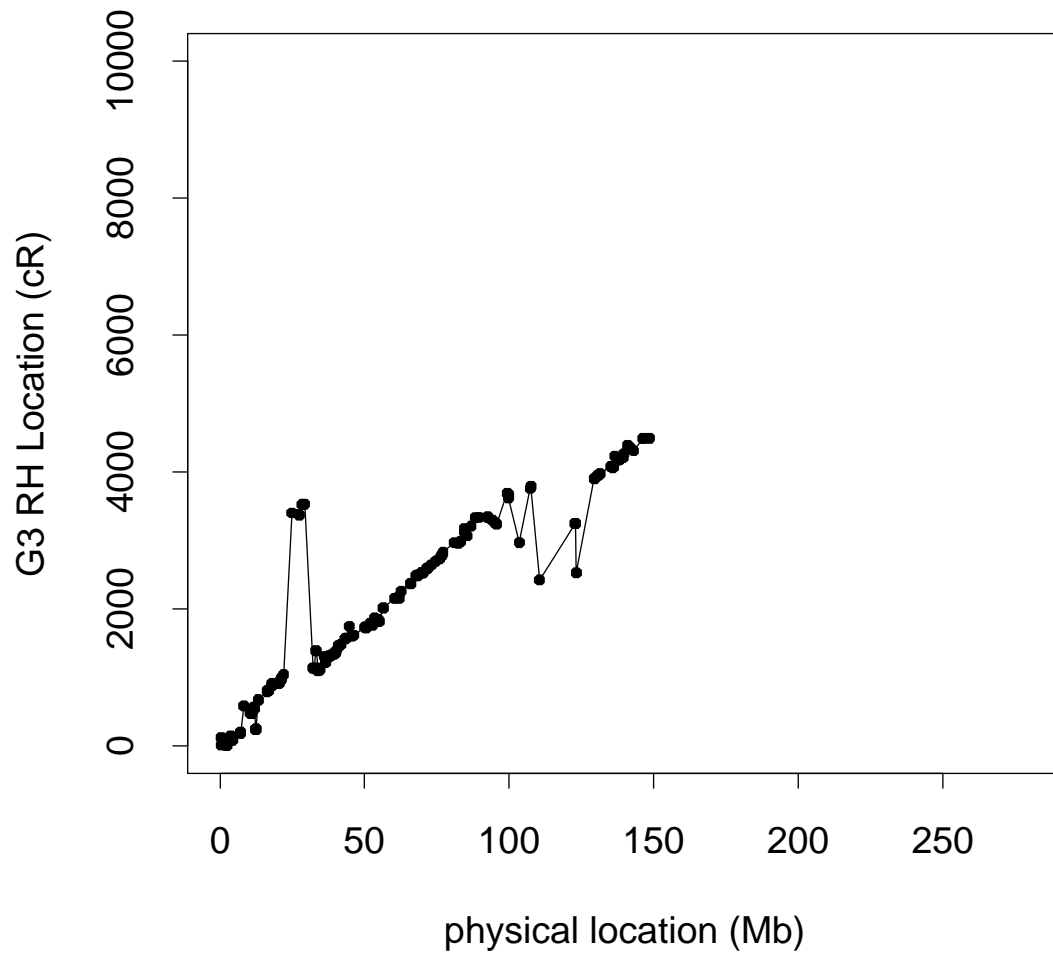



# Chrom 9

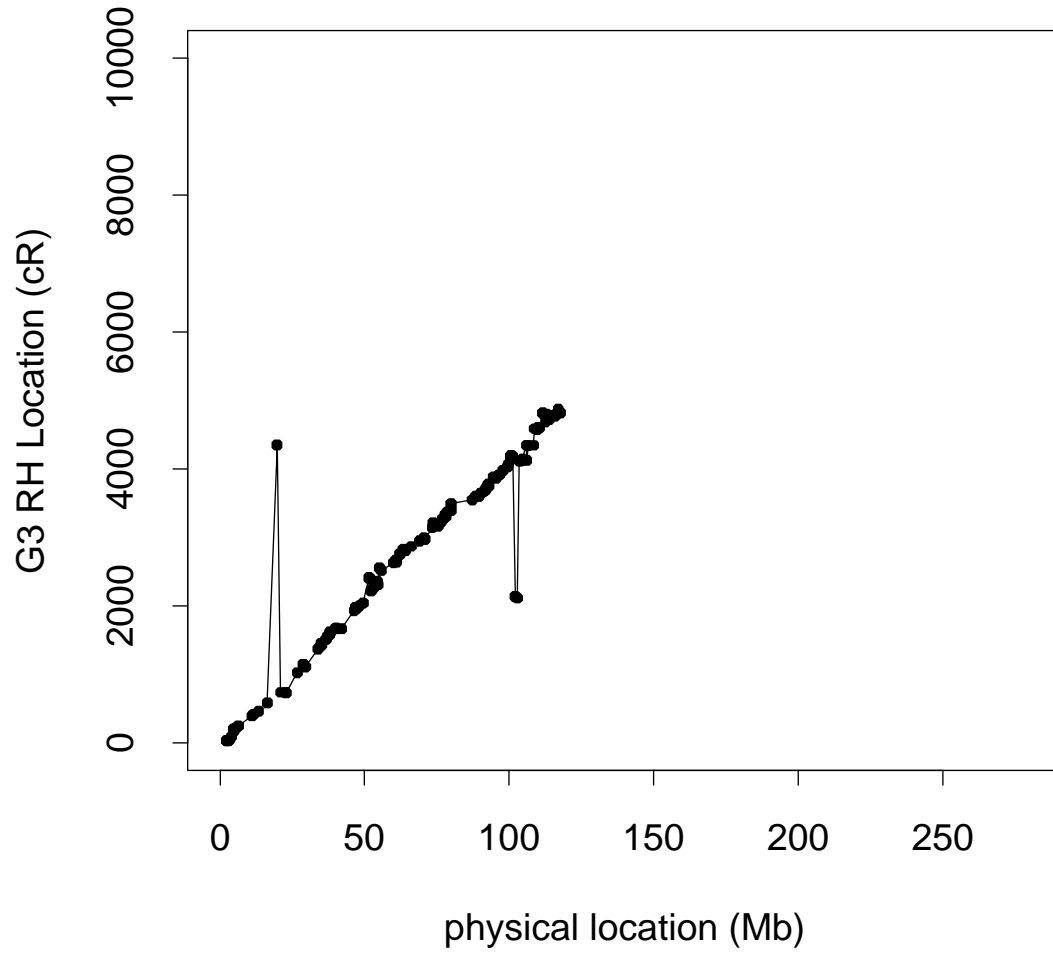

# Chrom 10

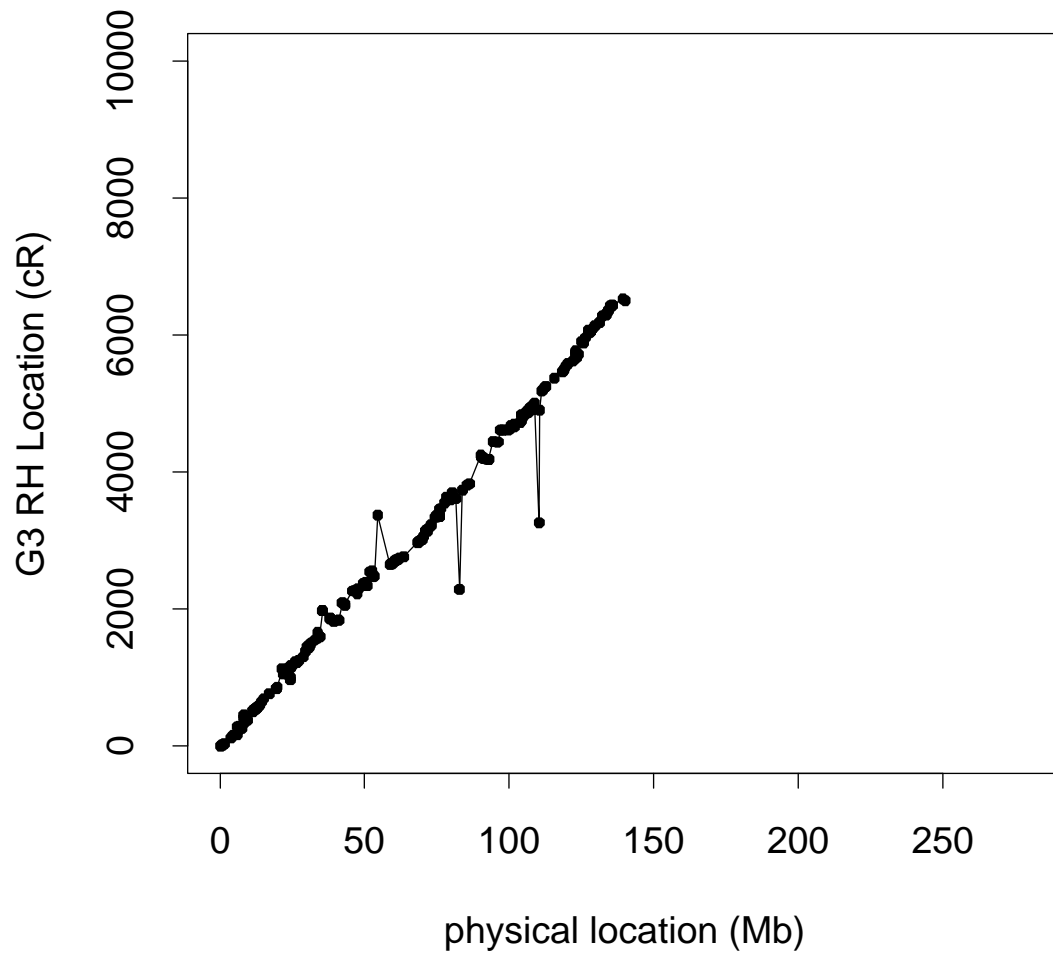

# Chrom 11

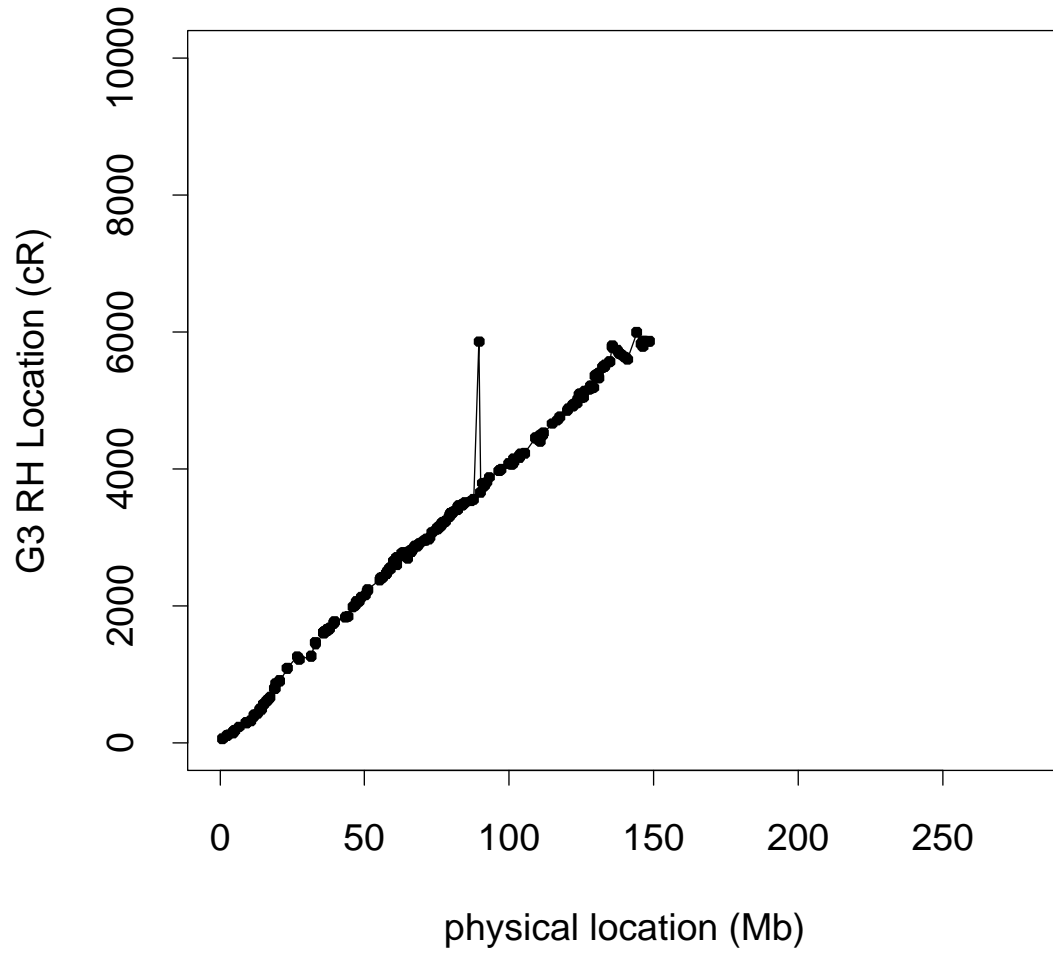

# Chrom 12

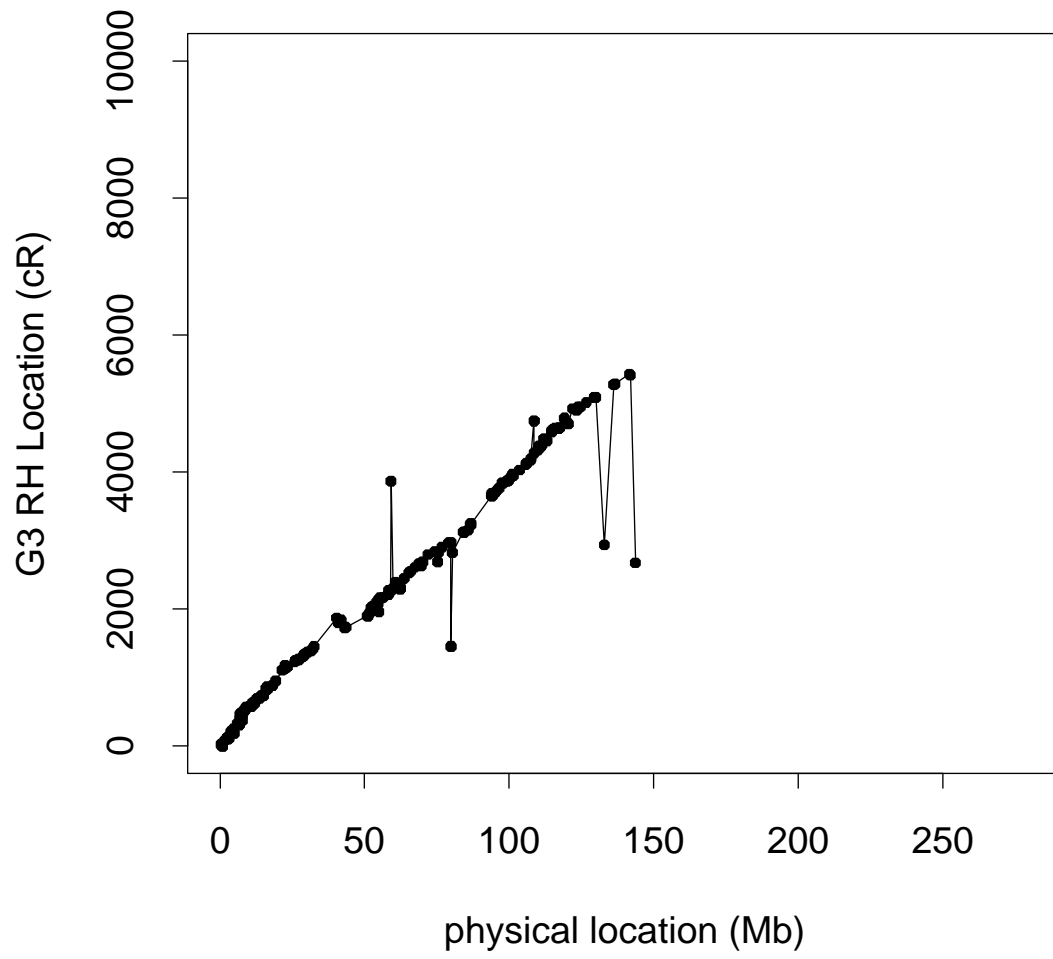

# Chrom 13

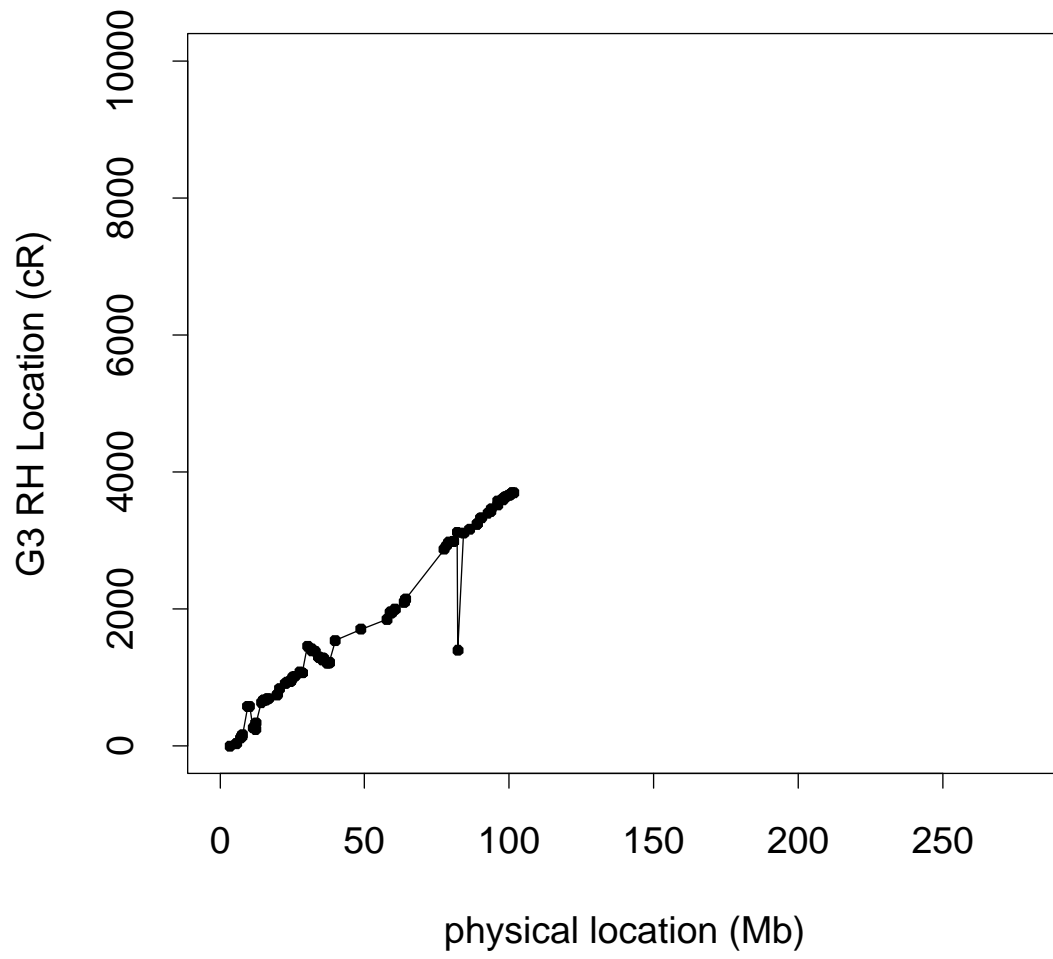

# Chrom 14

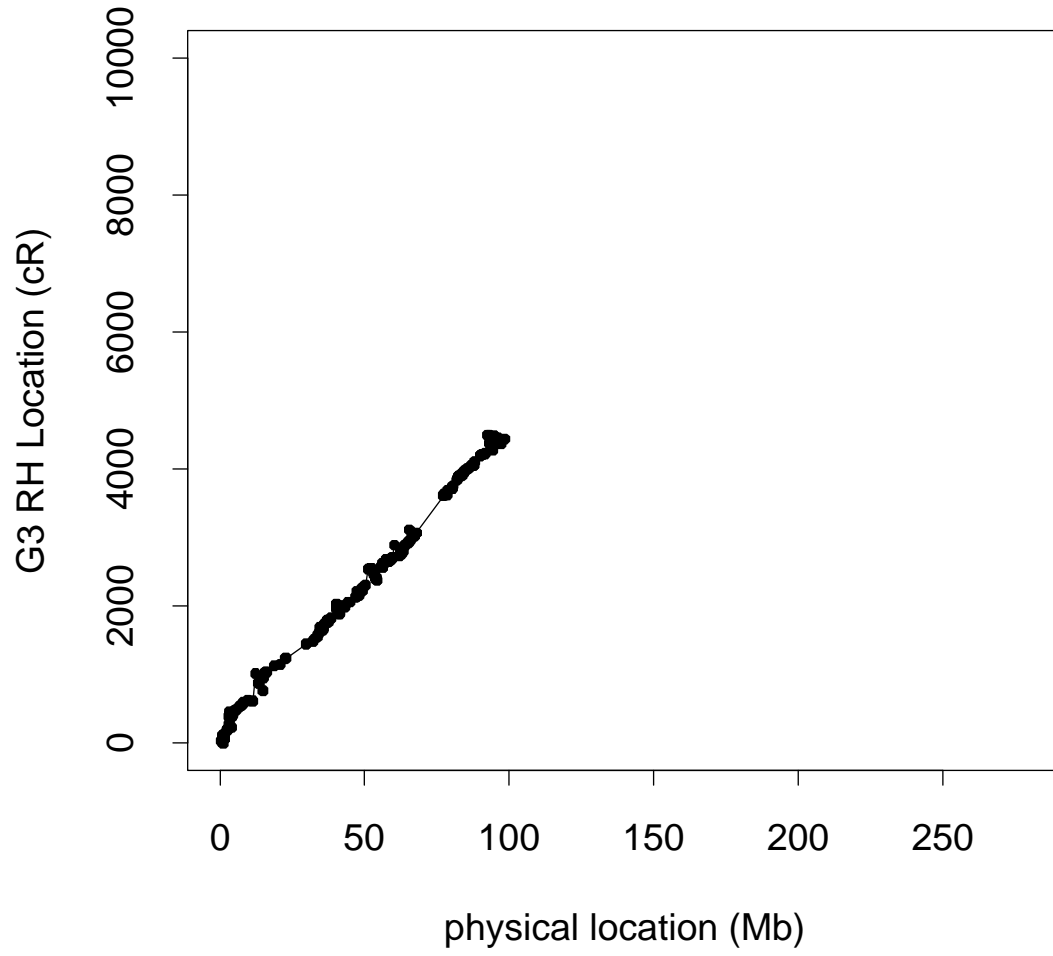

# Chrom 15

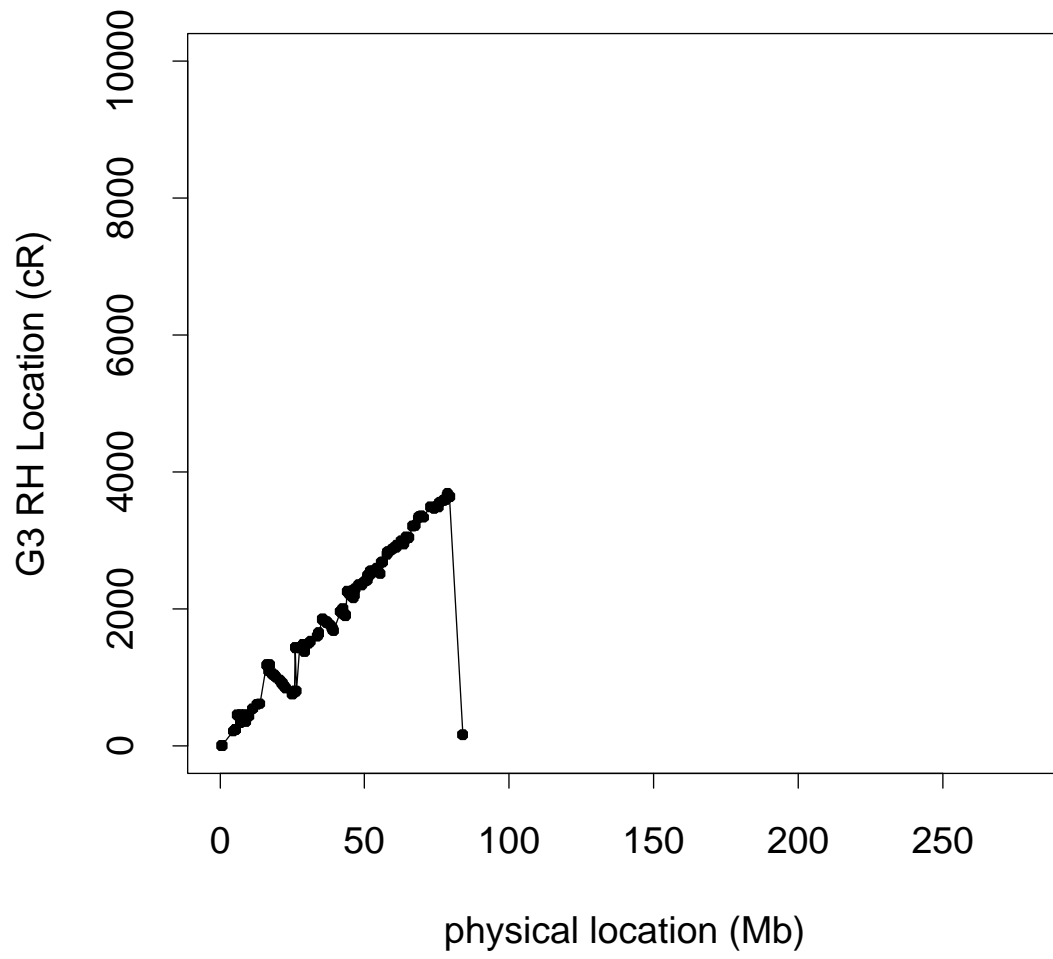

# Chrom 16

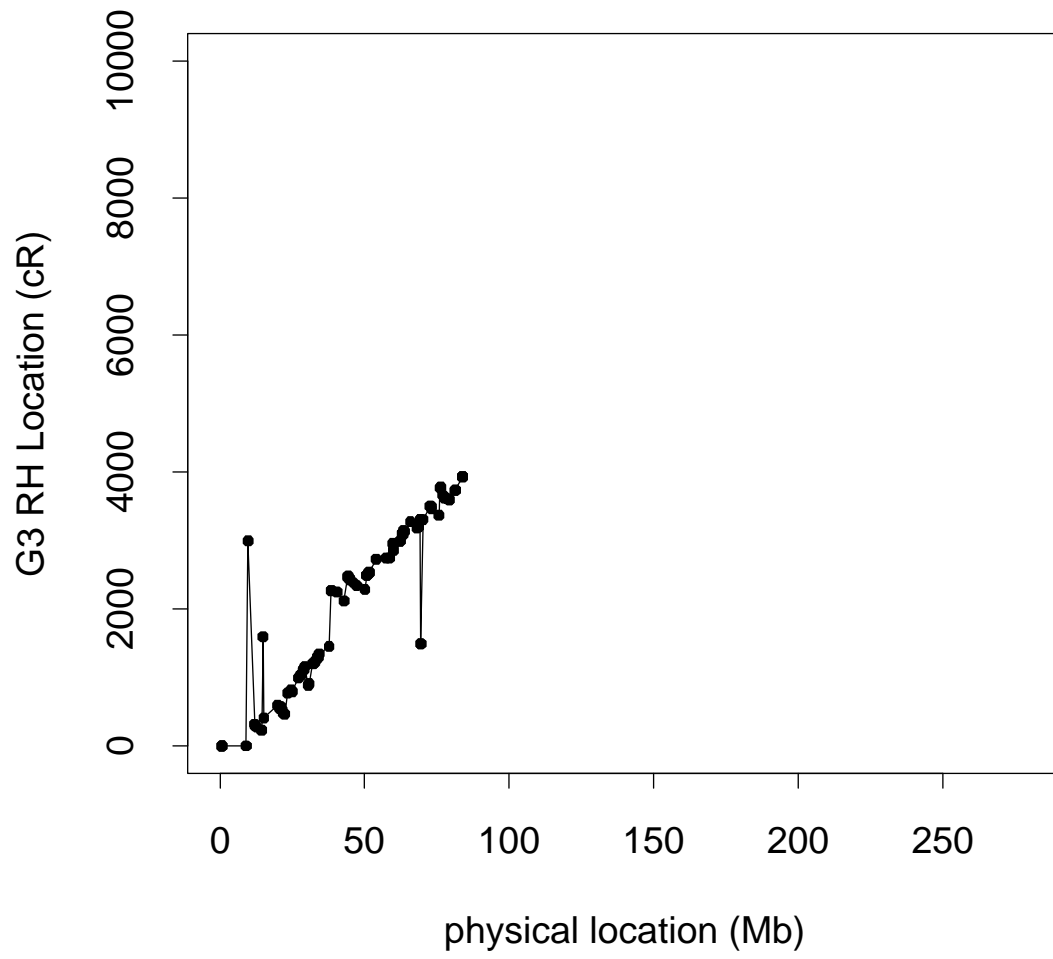



# Chrom 17

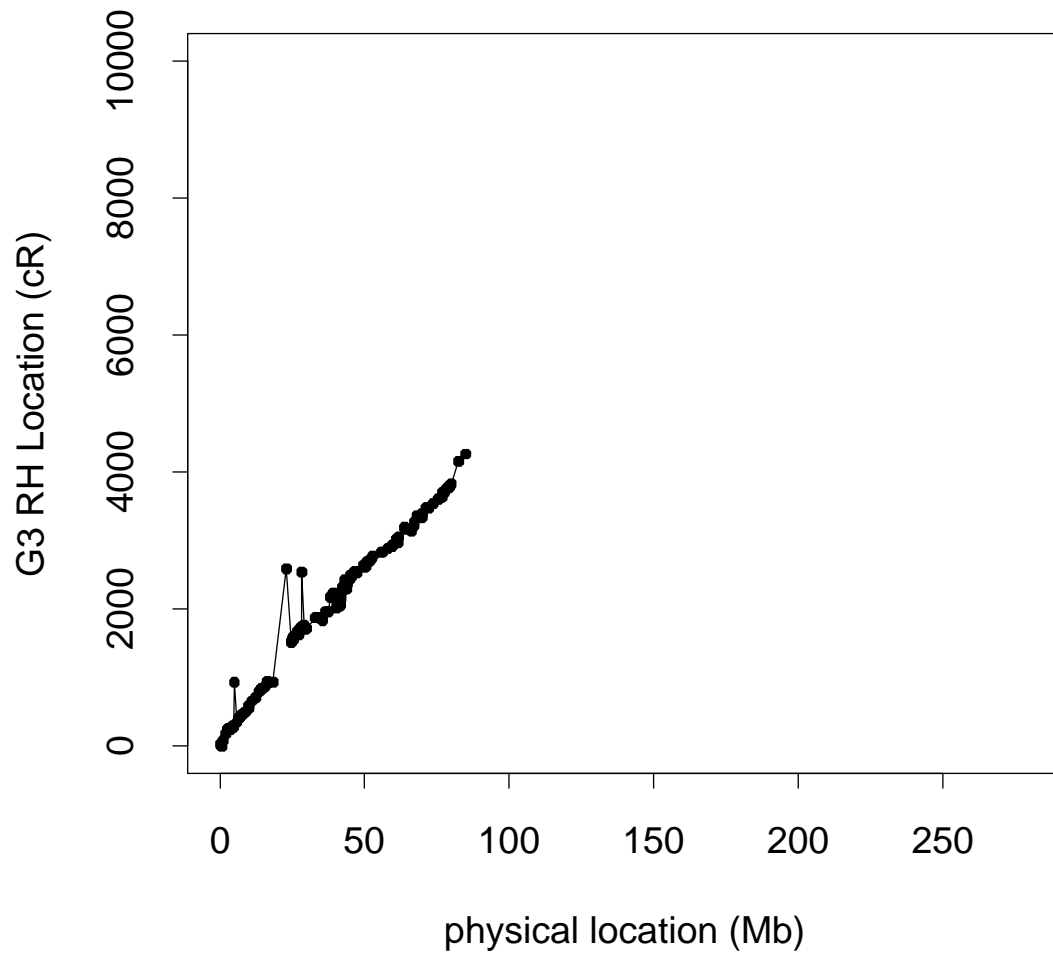

# Chrom 18

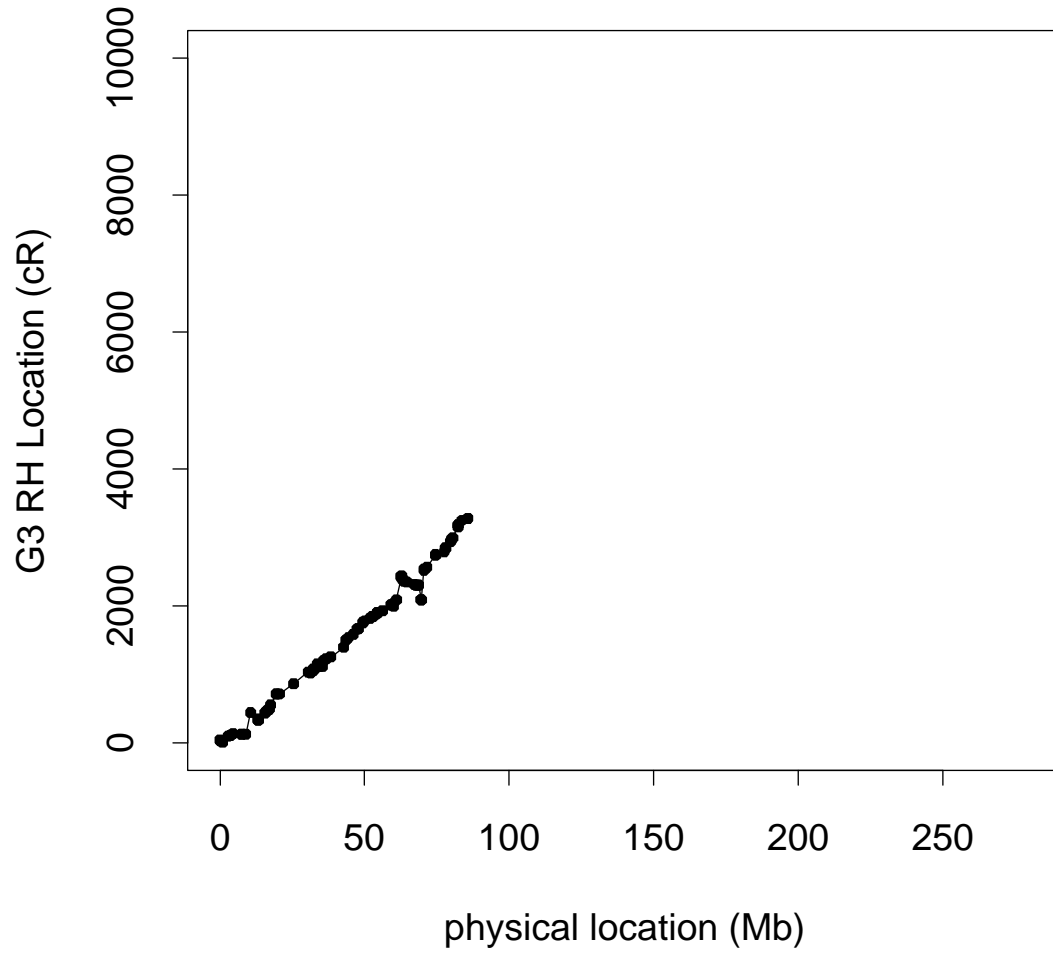

# Chrom 19

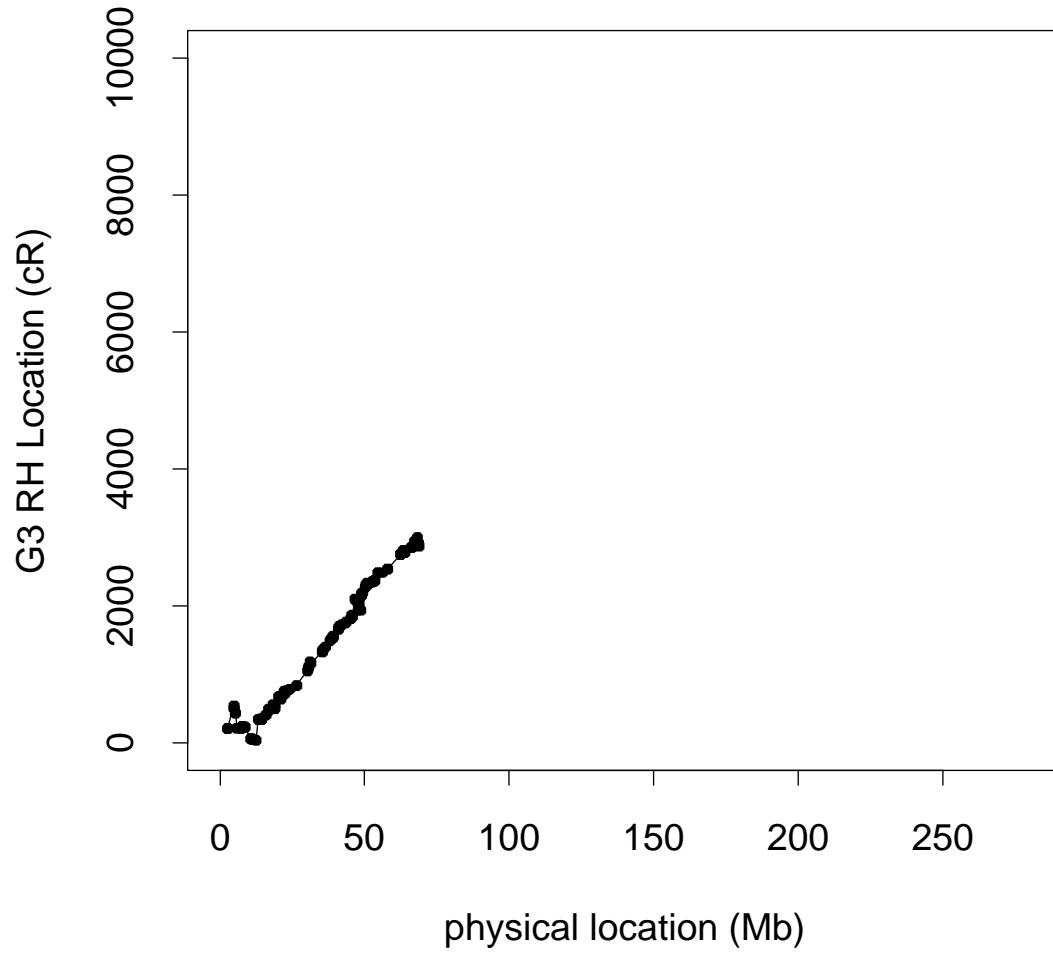

# Chrom 20

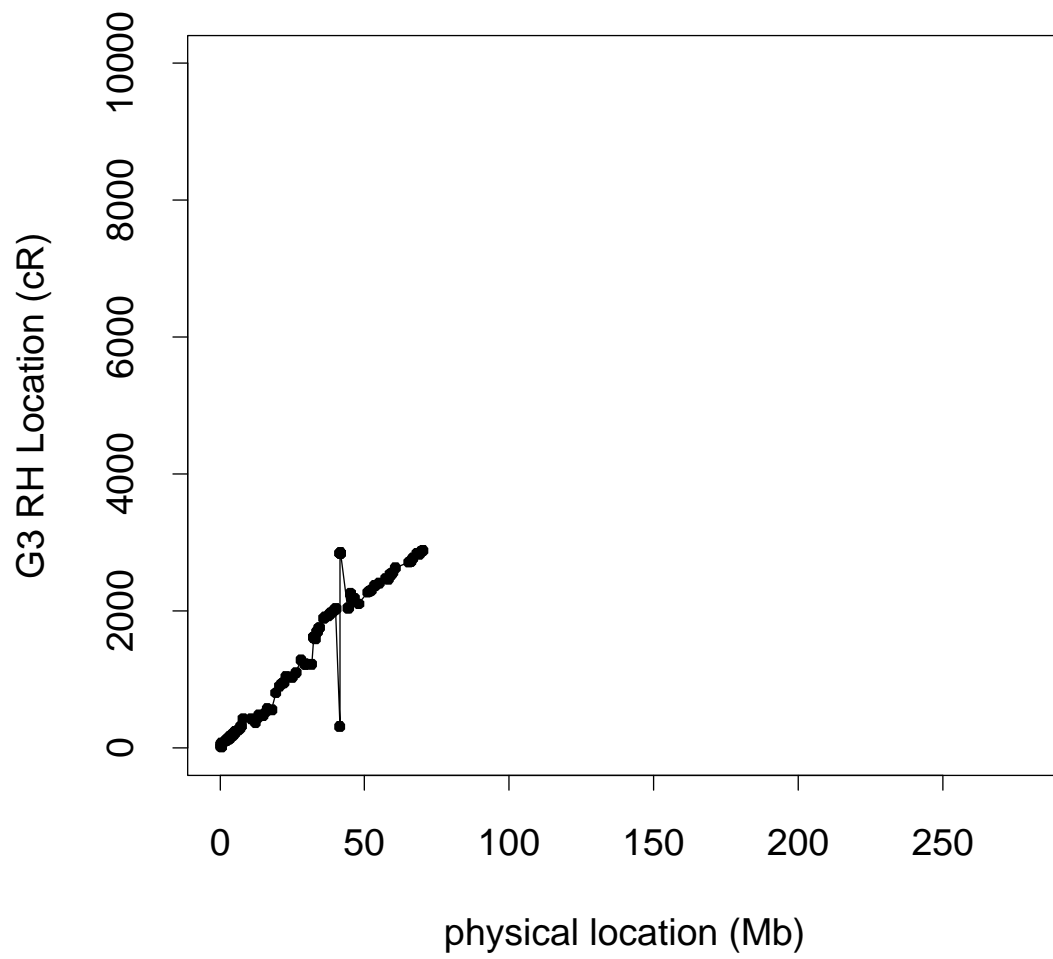

# Chrom 21

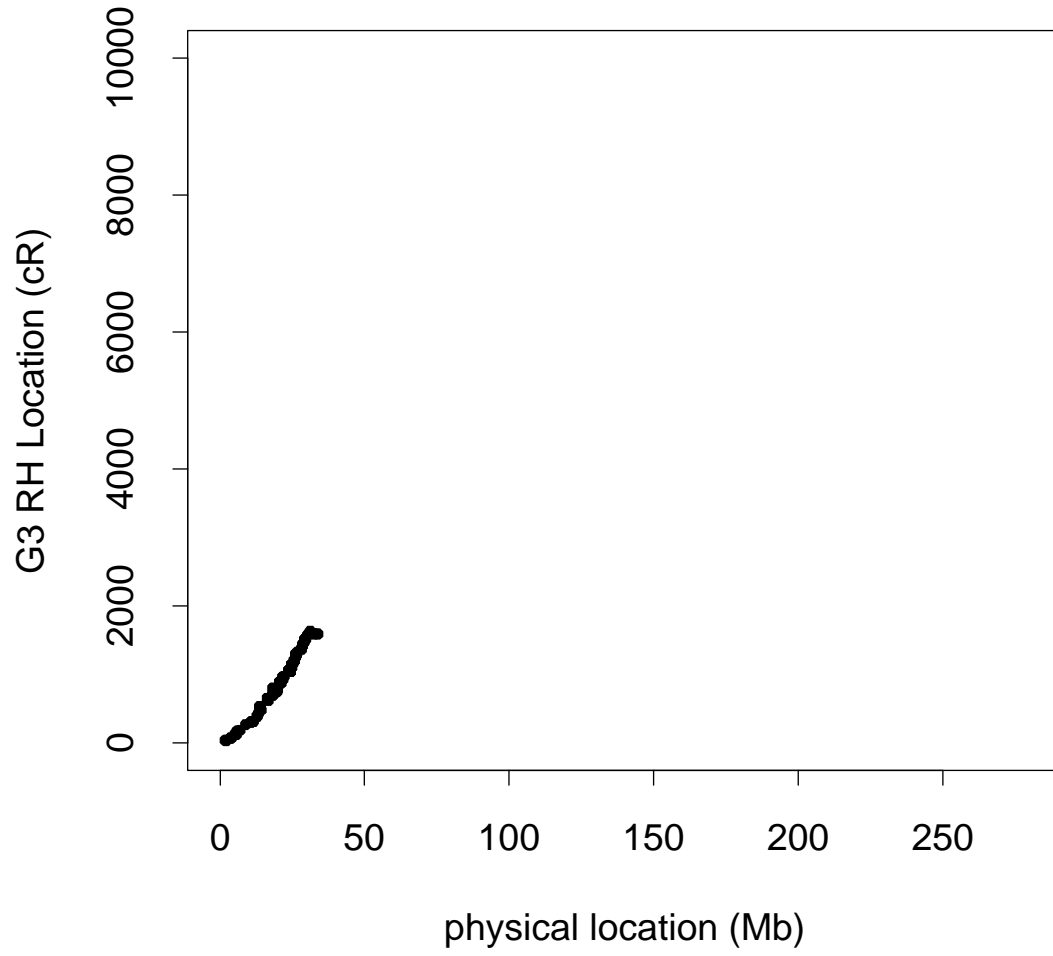

# Chrom 22

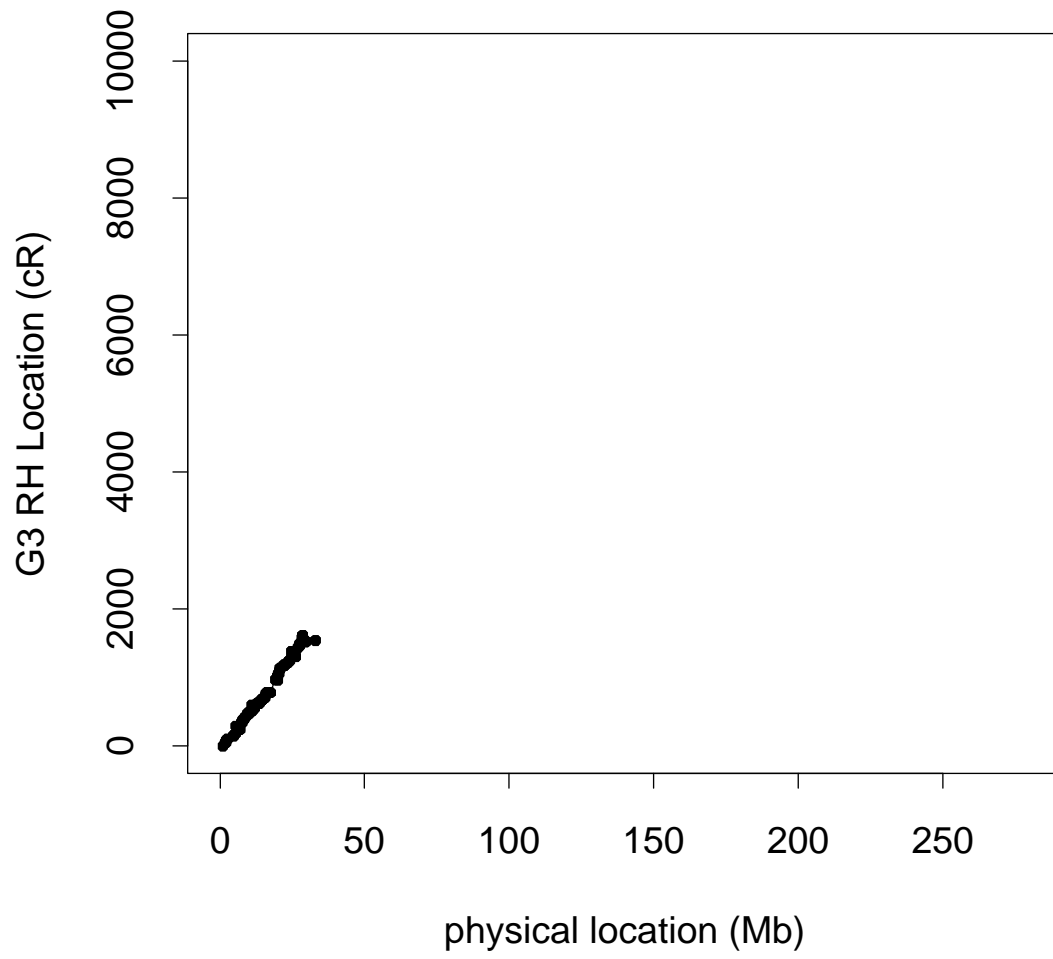

# Chrom 23

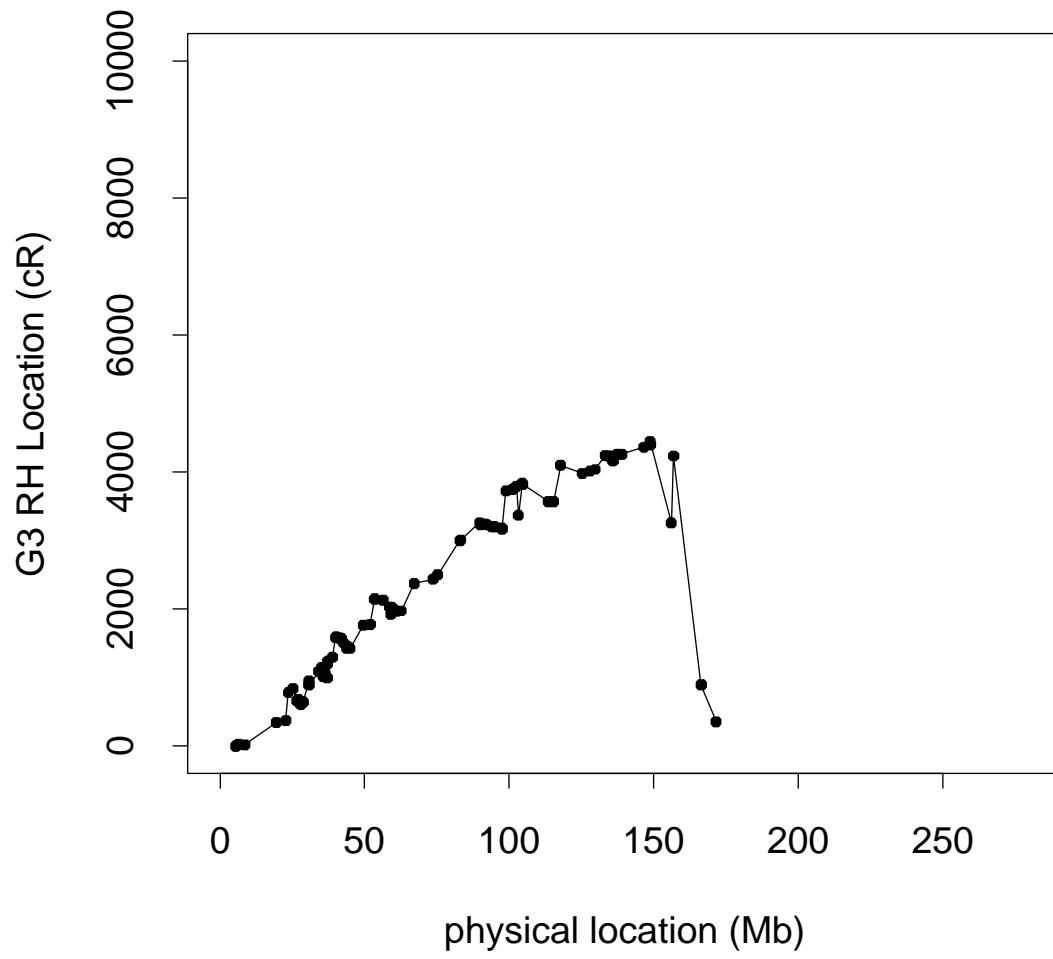

Supplement: gb-2001-2-7-research0025-S81.pdf [file gb-2001-2-7-research0025-S81.pdf]
