# Supplementary material
Source: PubMed Central journal article supplement (PMC55322)
Supplement: gb-2001-2-7-research0025-S94.pdf [file gb-2001-2-7-research0025-S94.pdf]

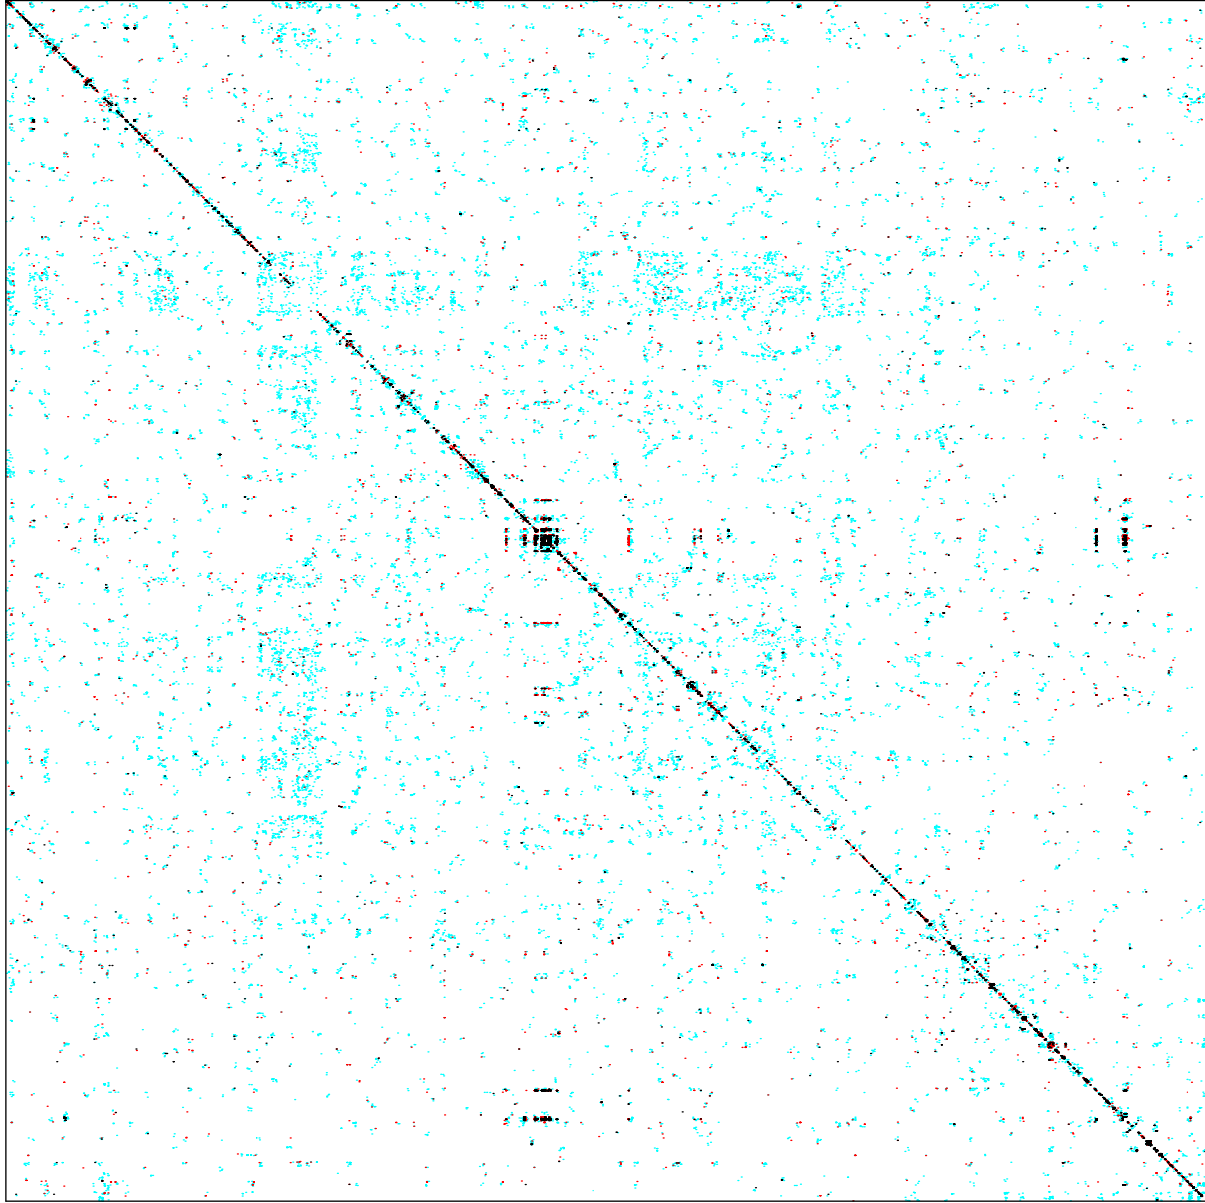

Homology:  
70-79%  
80-89%  
90-100%

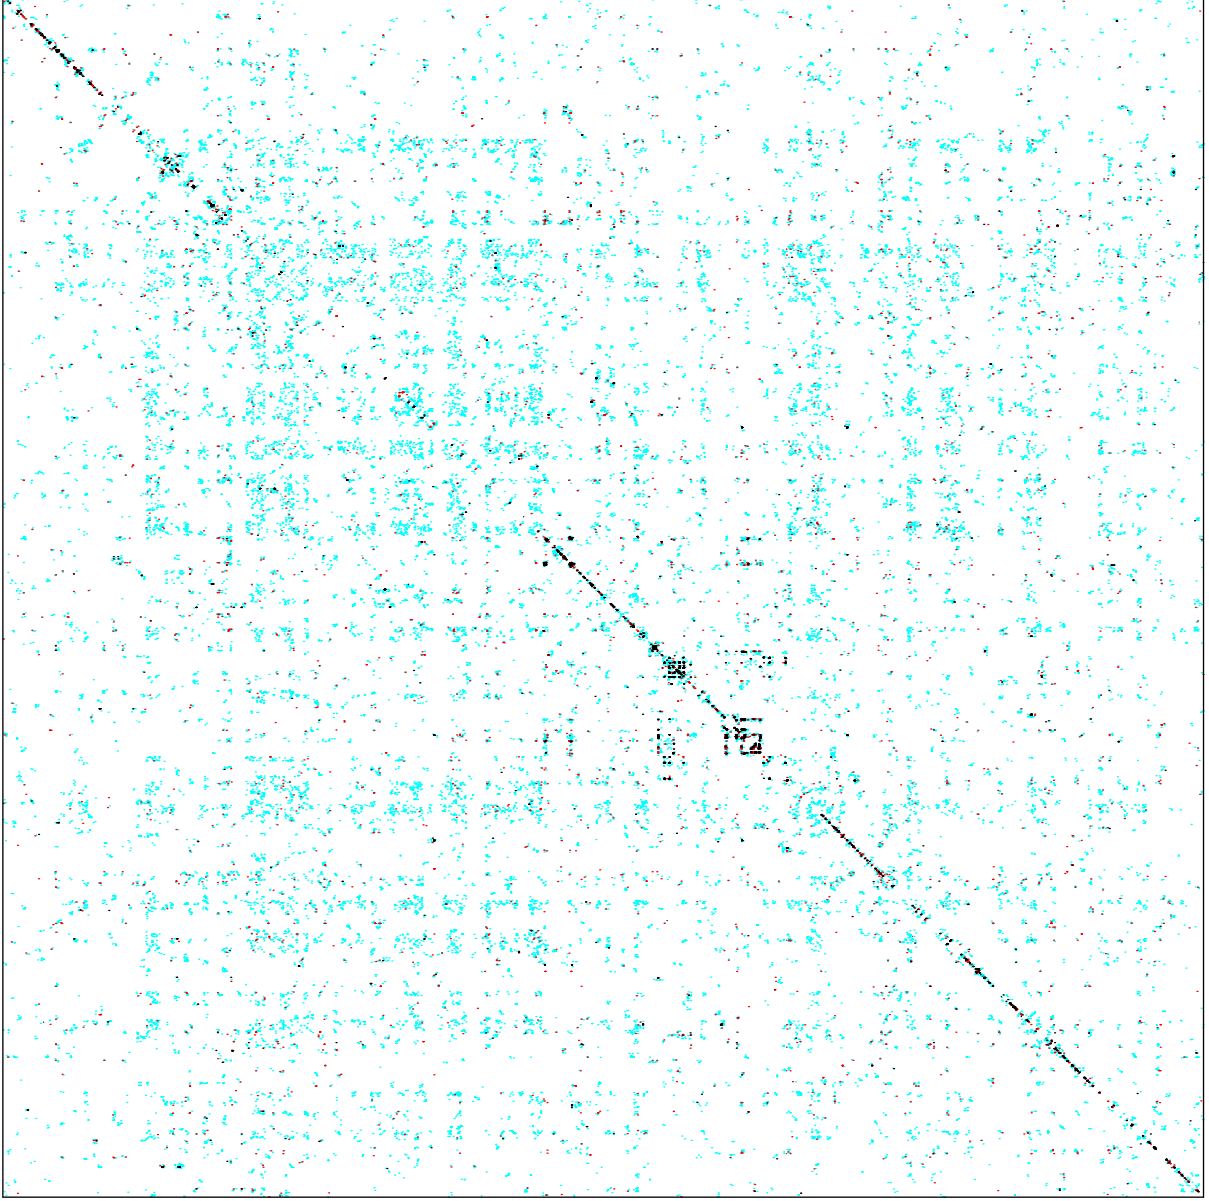

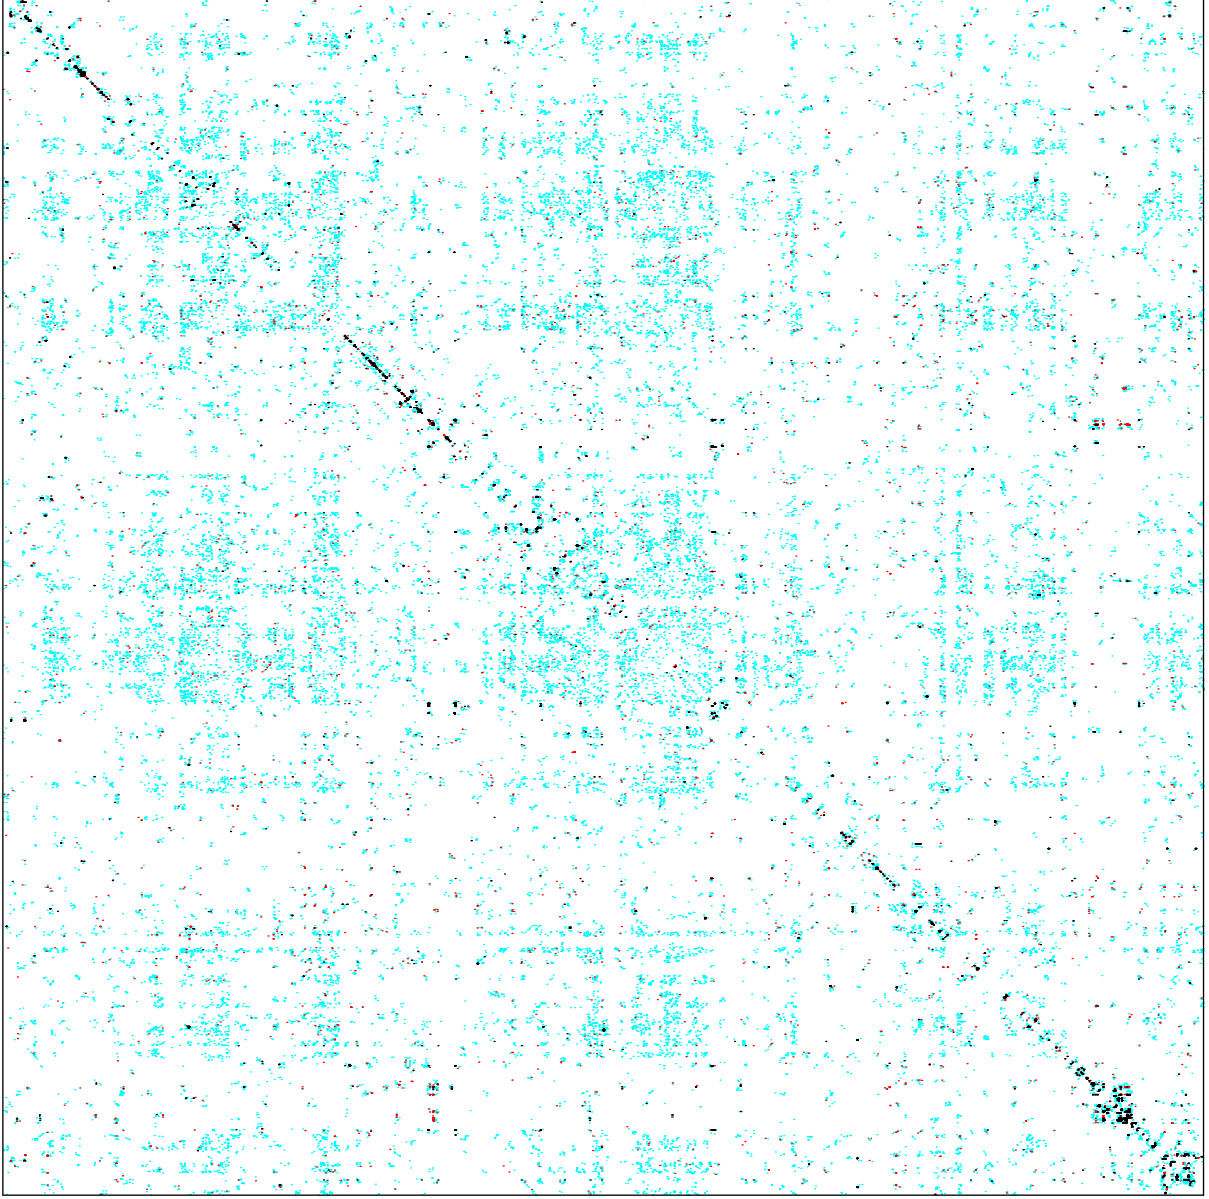

Homology:  
70-79%  
80-89%  
90-100%

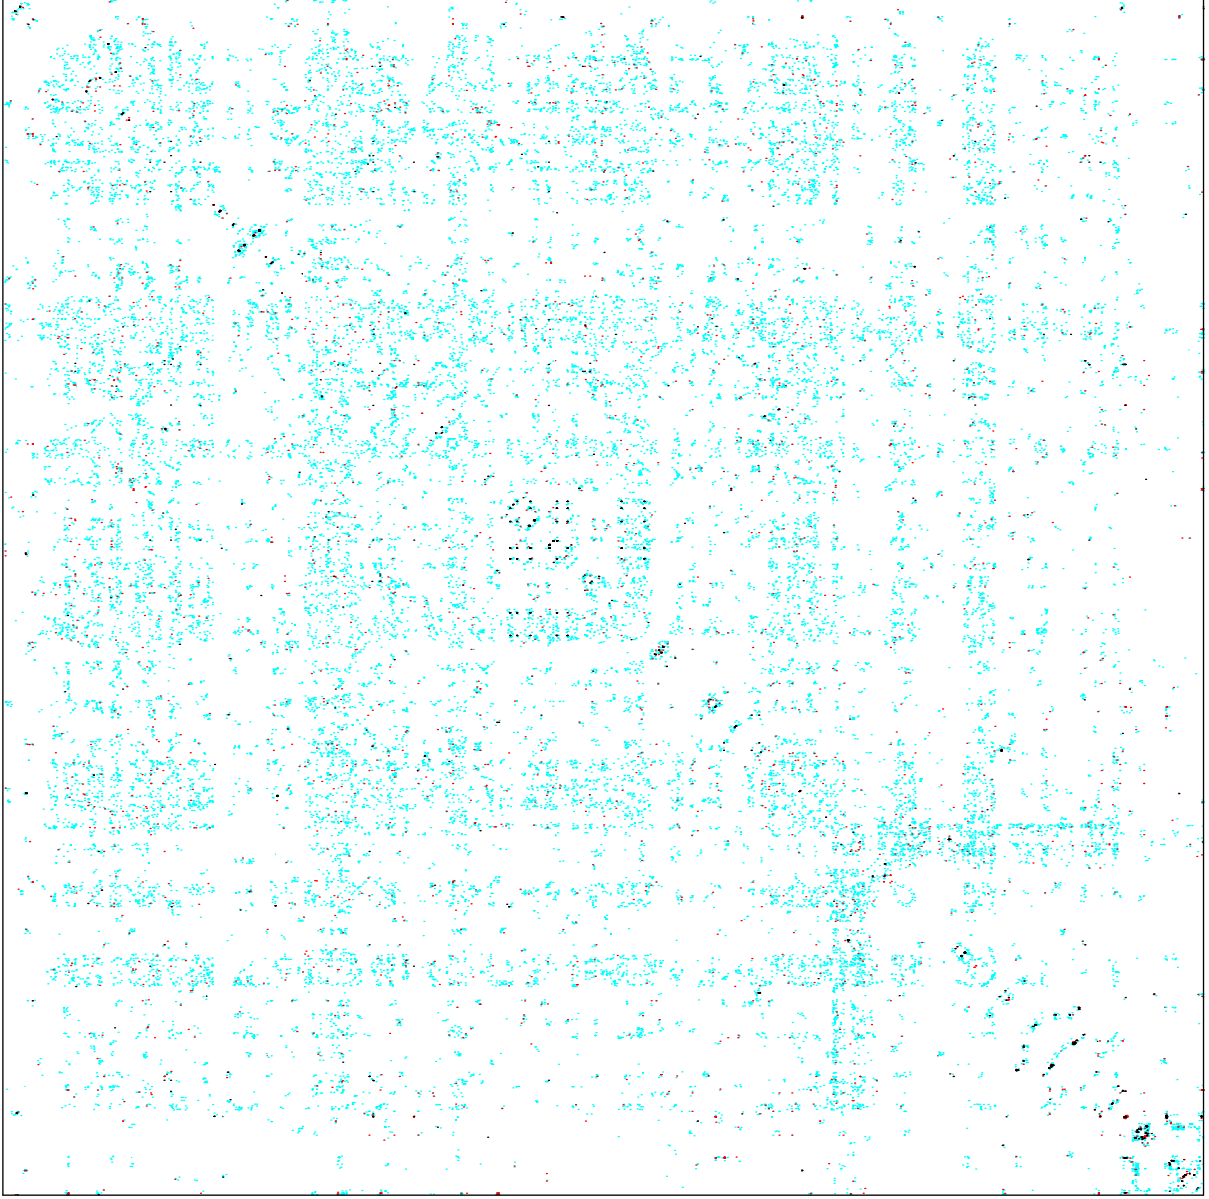

Homology:  
70-79%  
80-89%  
90-100%

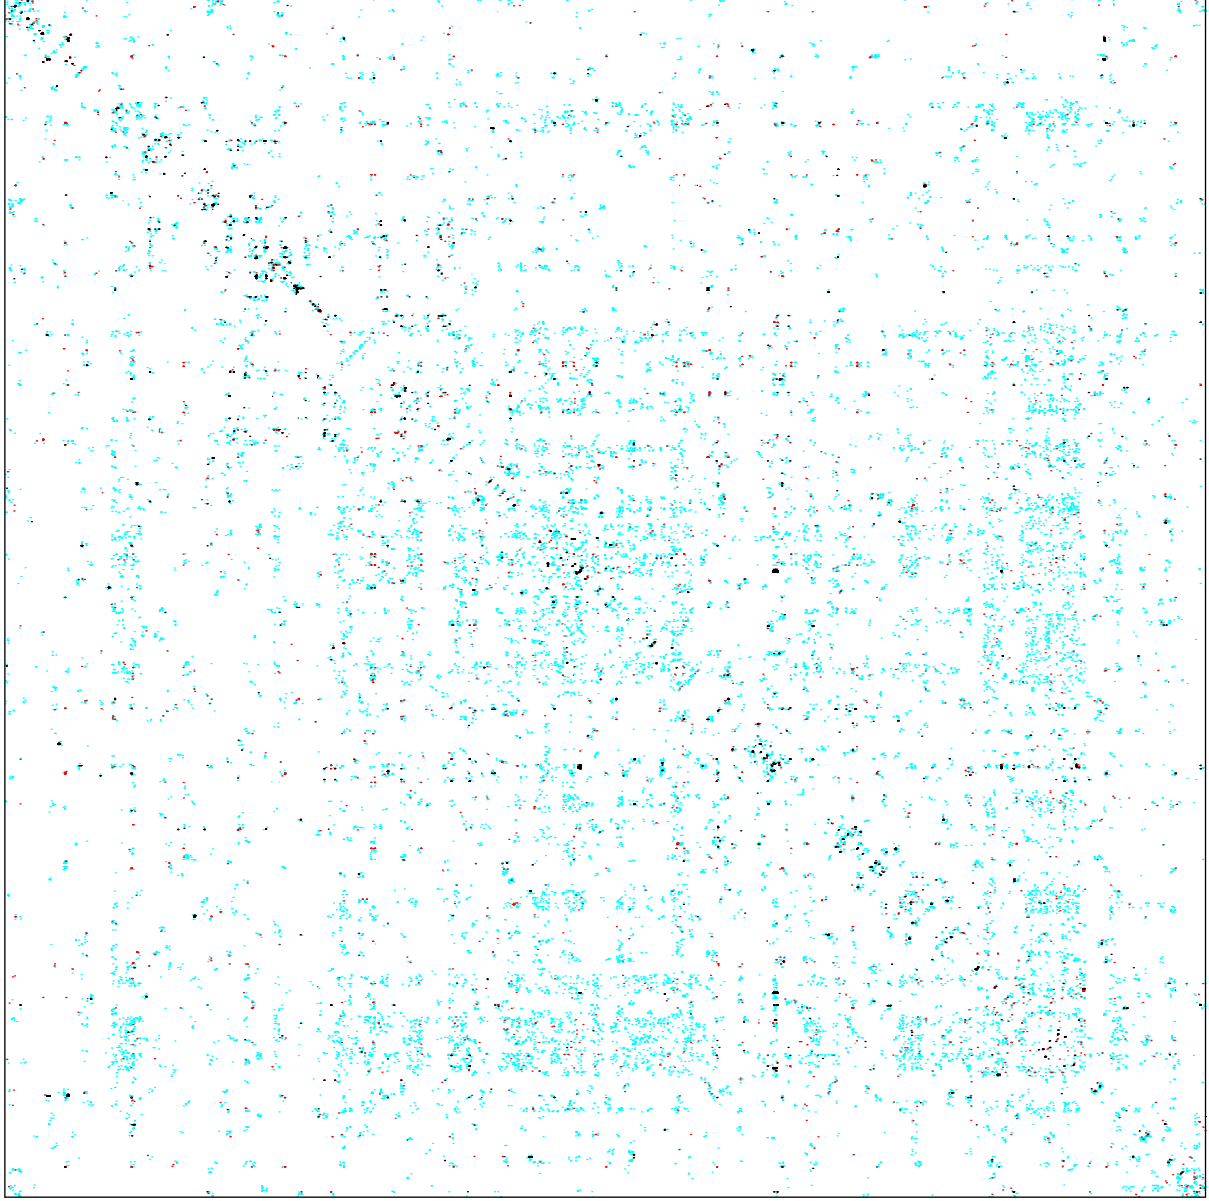

Homology:  
70-79%  
80-89%  
90-100%

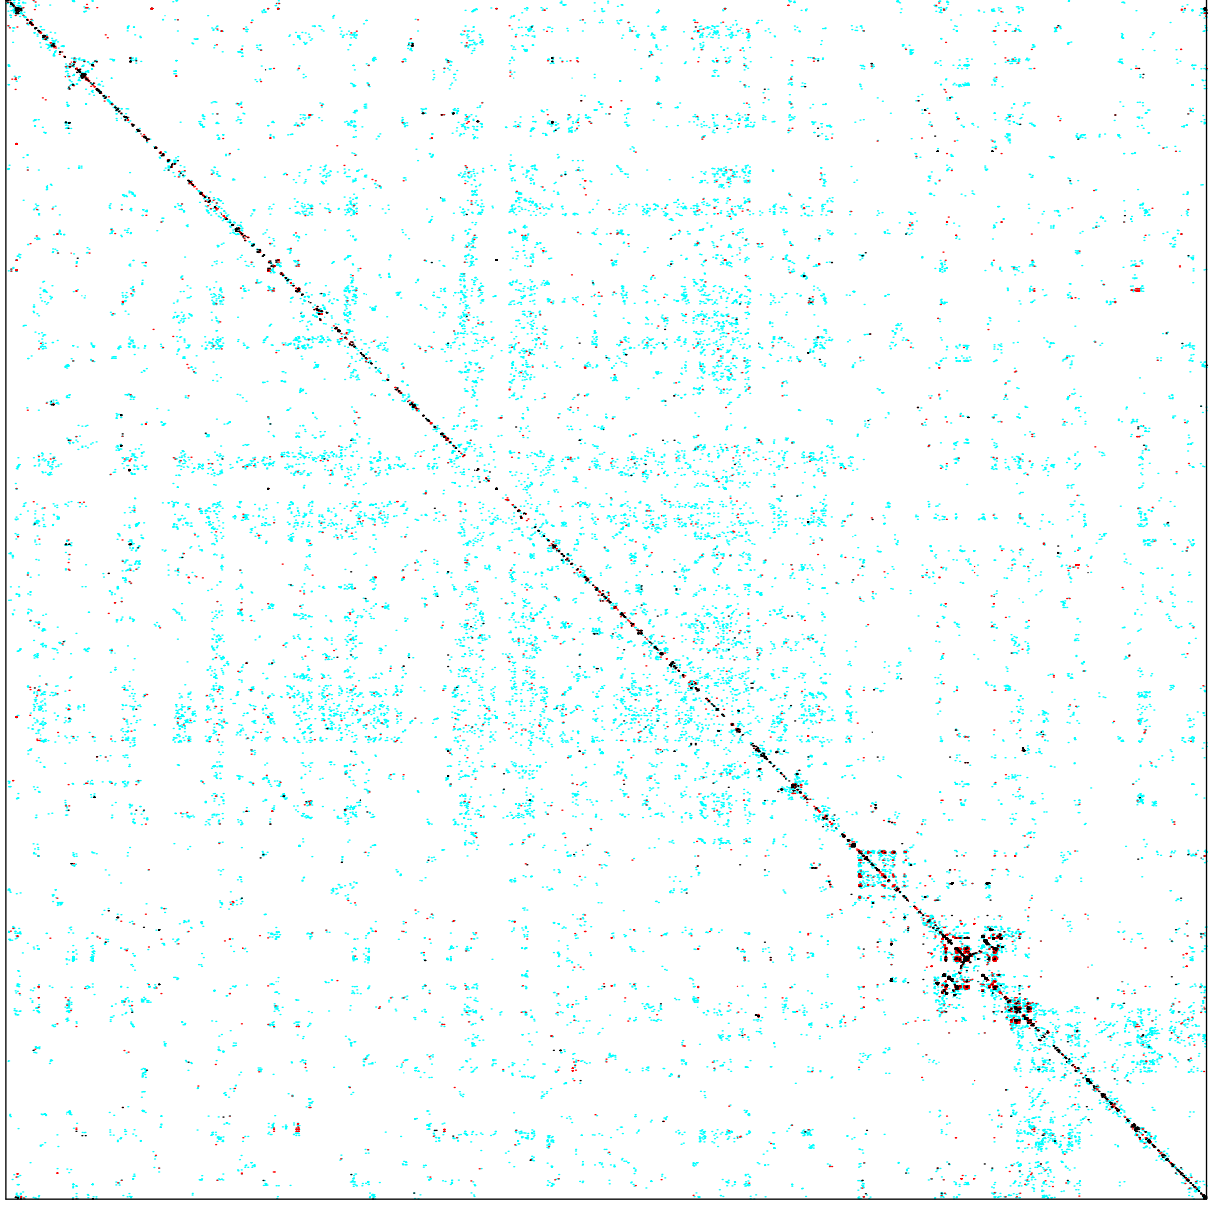

Homology:  
70-79%  
80-89%  
90-100%

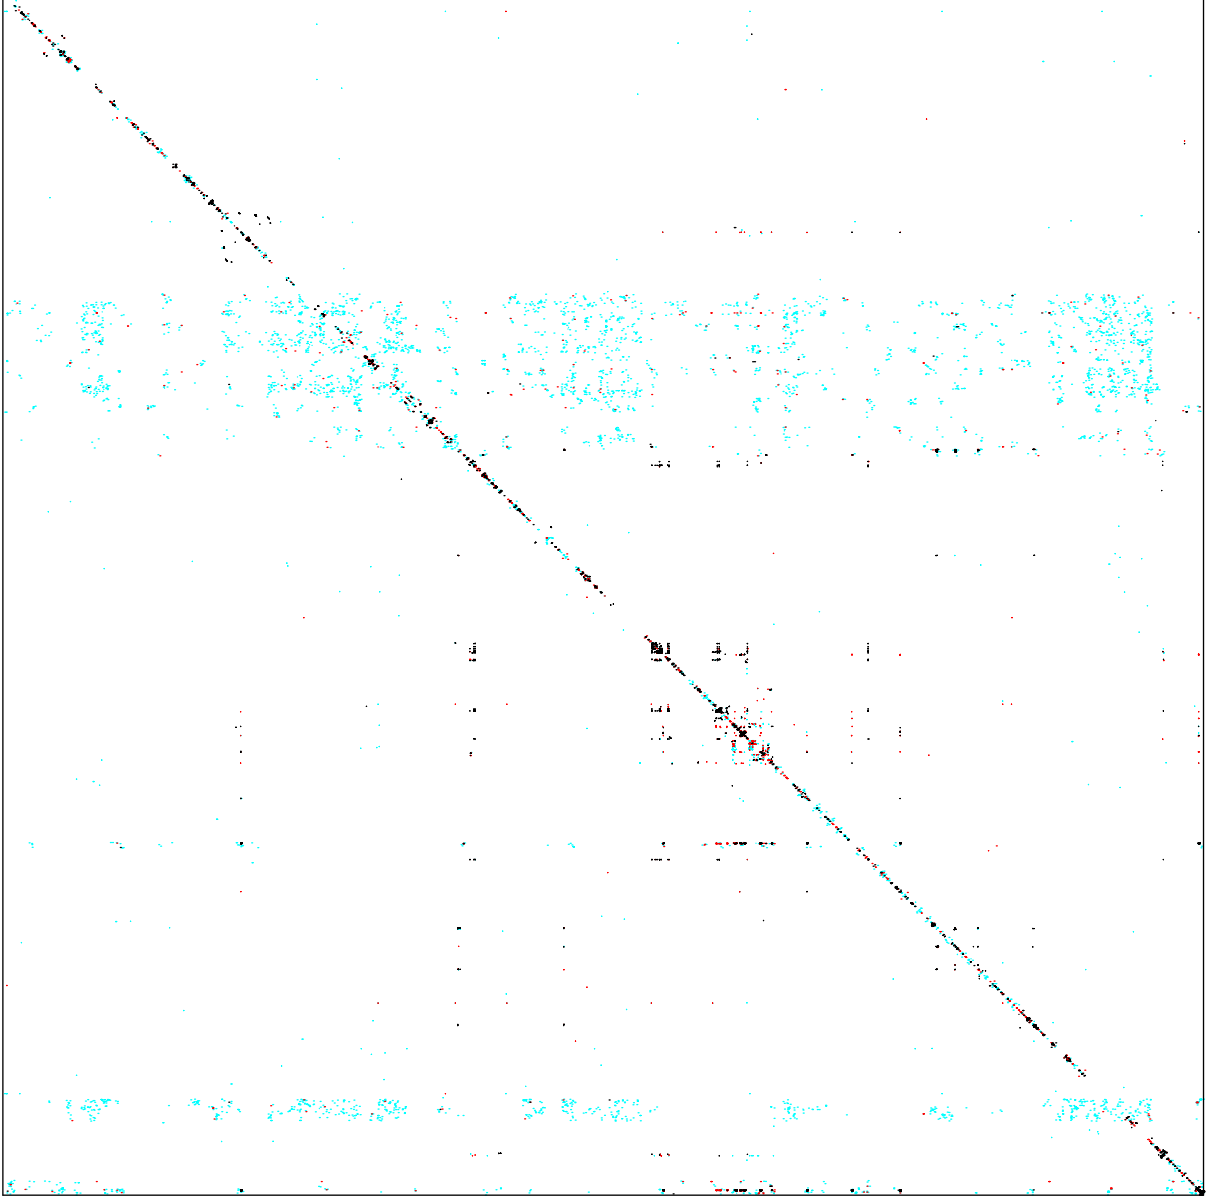

Homology:  
70-79%  
80-89%  
90-100%

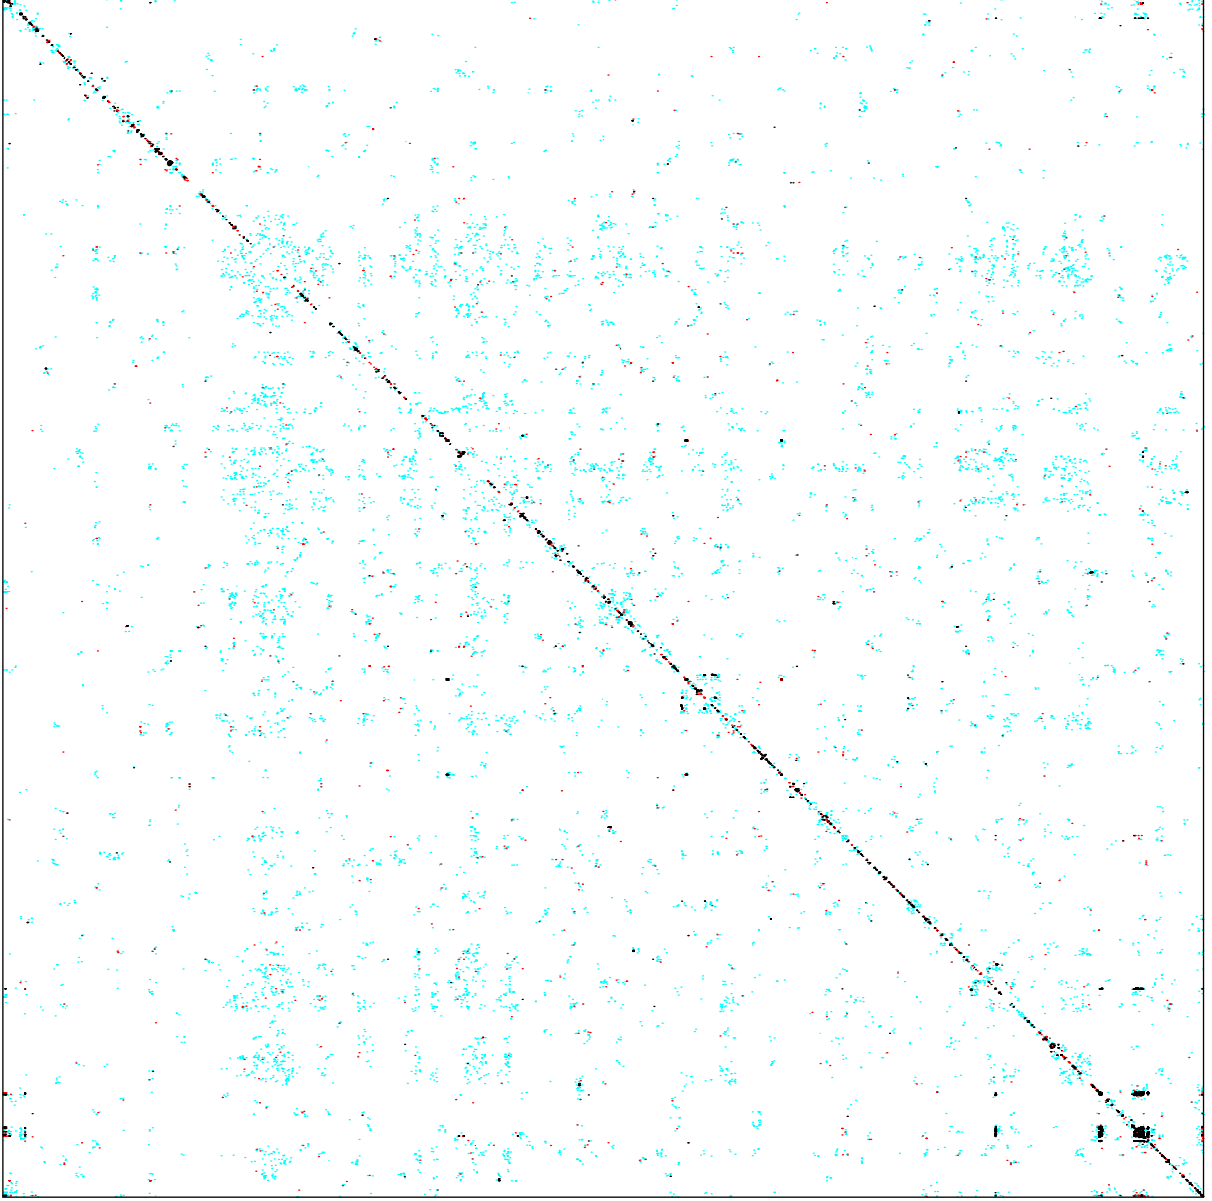



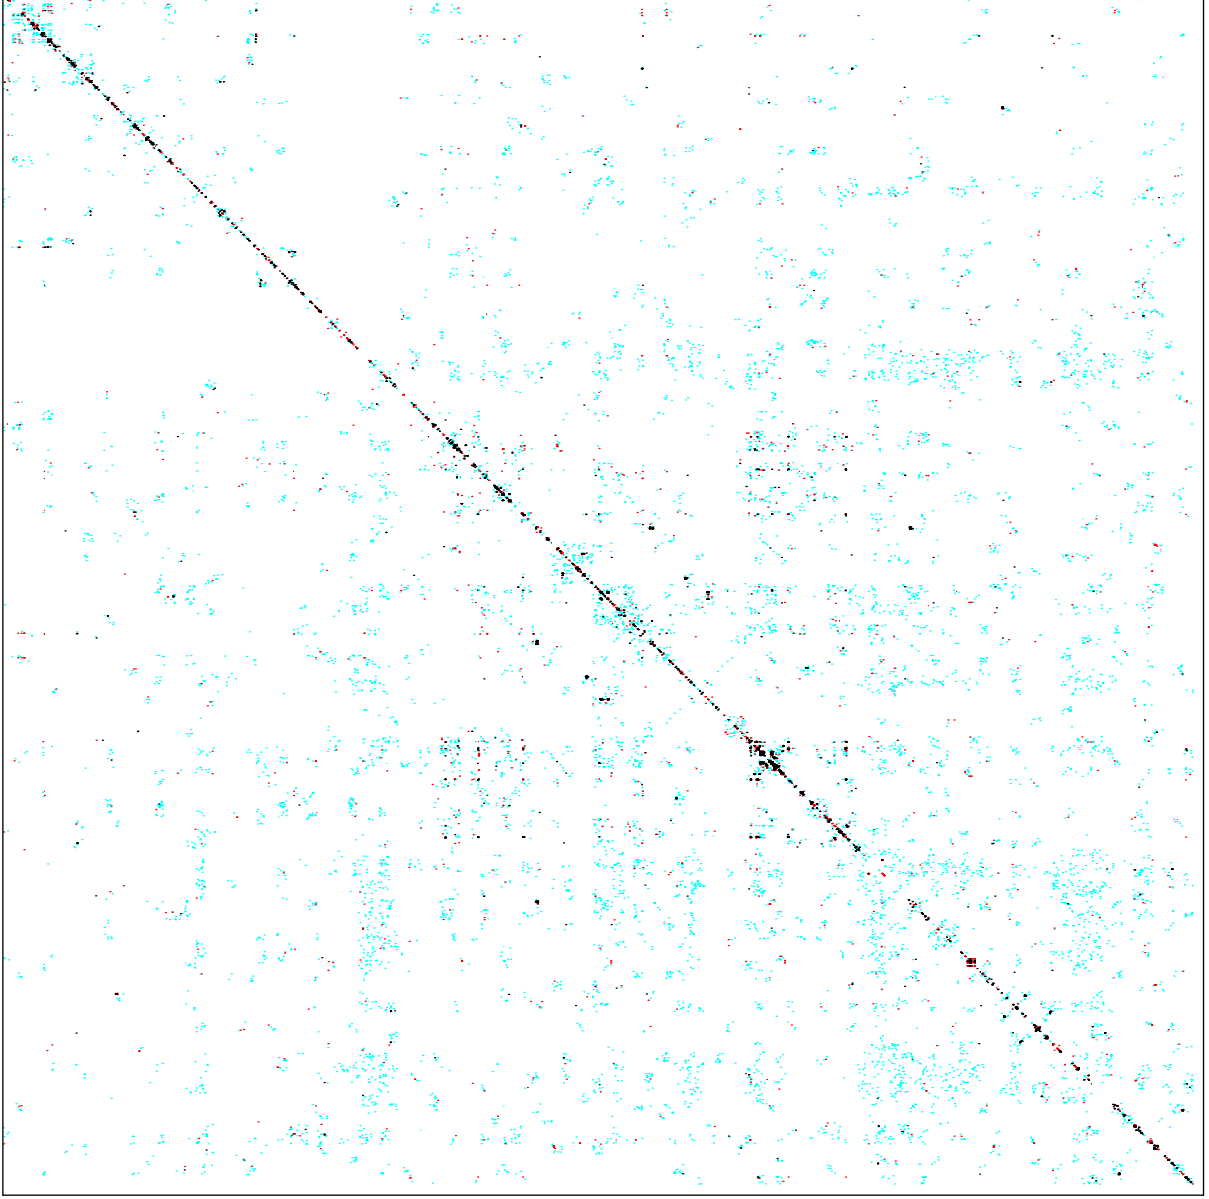

Homology:  
70-79%  
80-89%  
90-100%

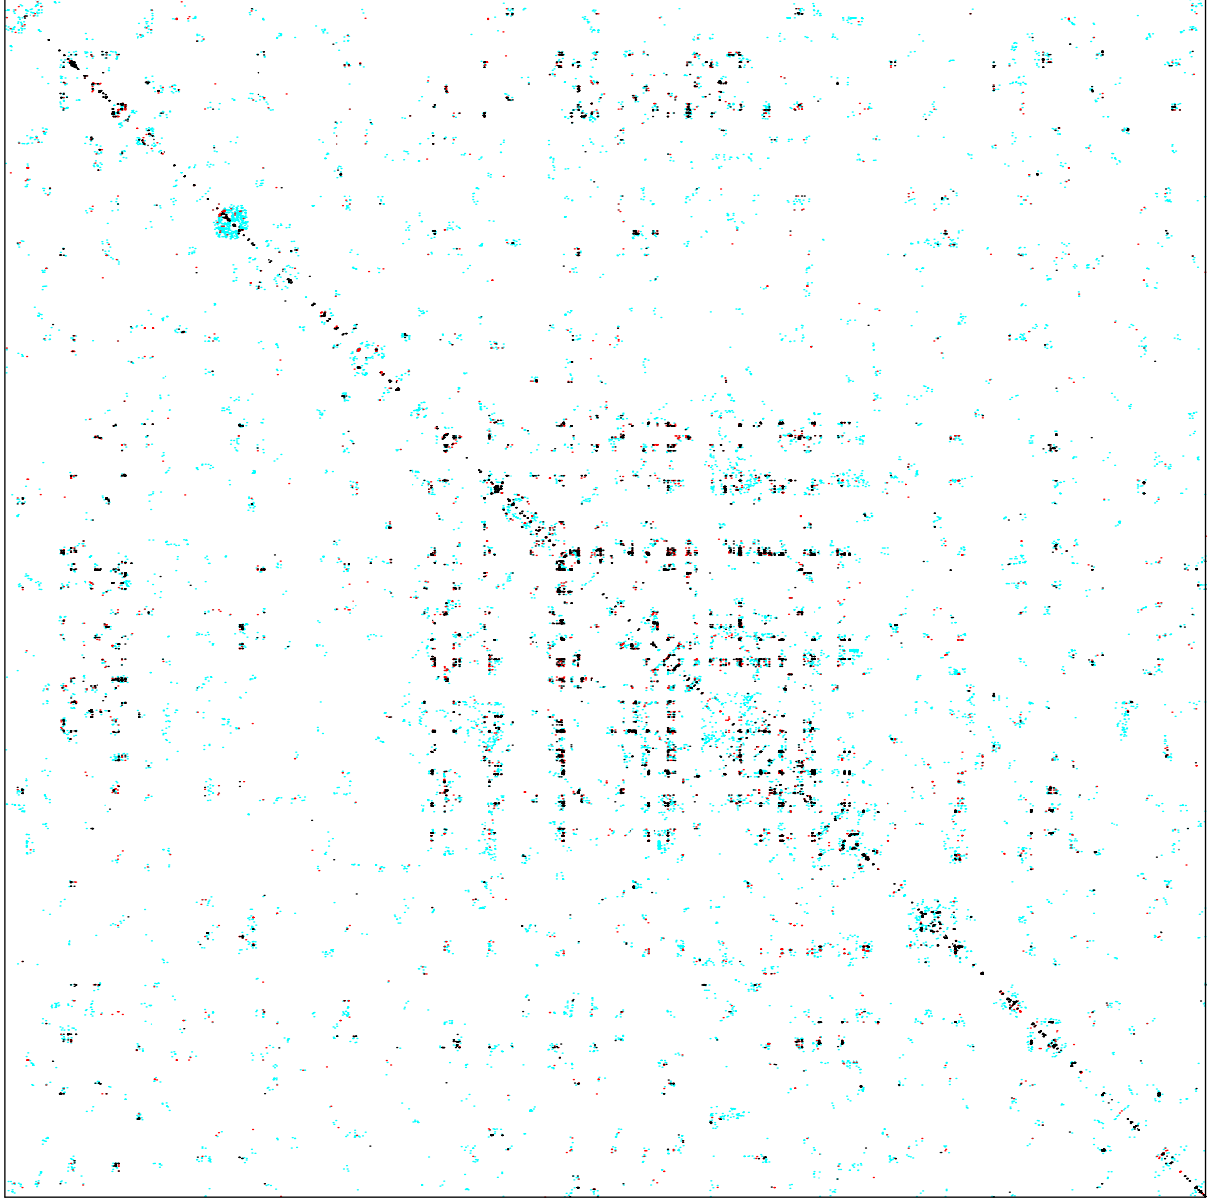

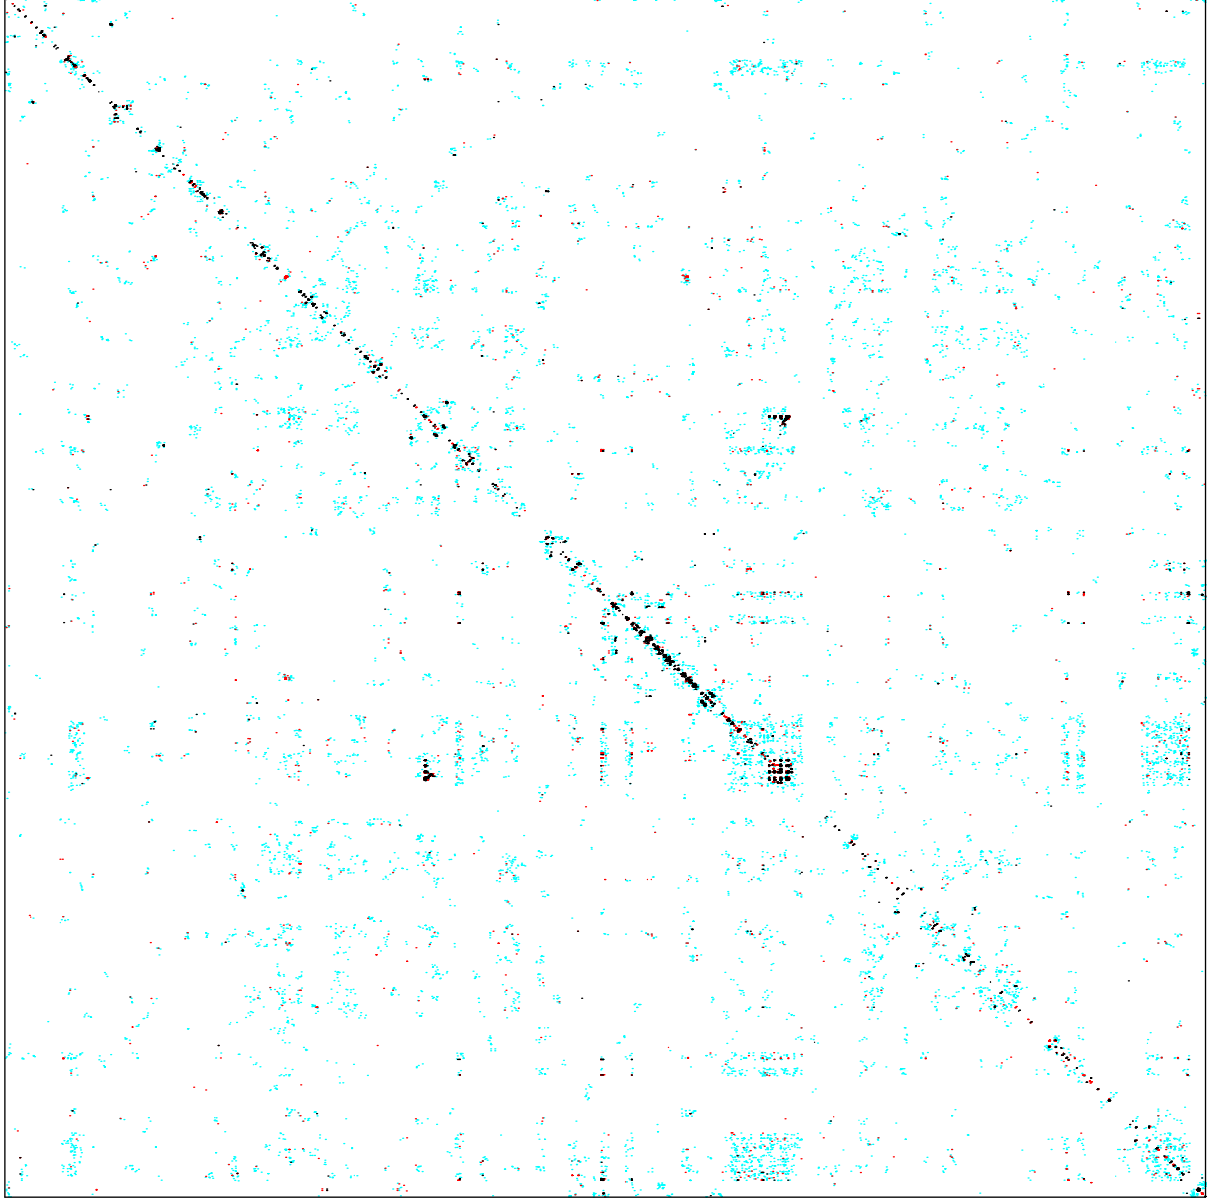

Homology:  
70-79%  
80-89%  
90-100%

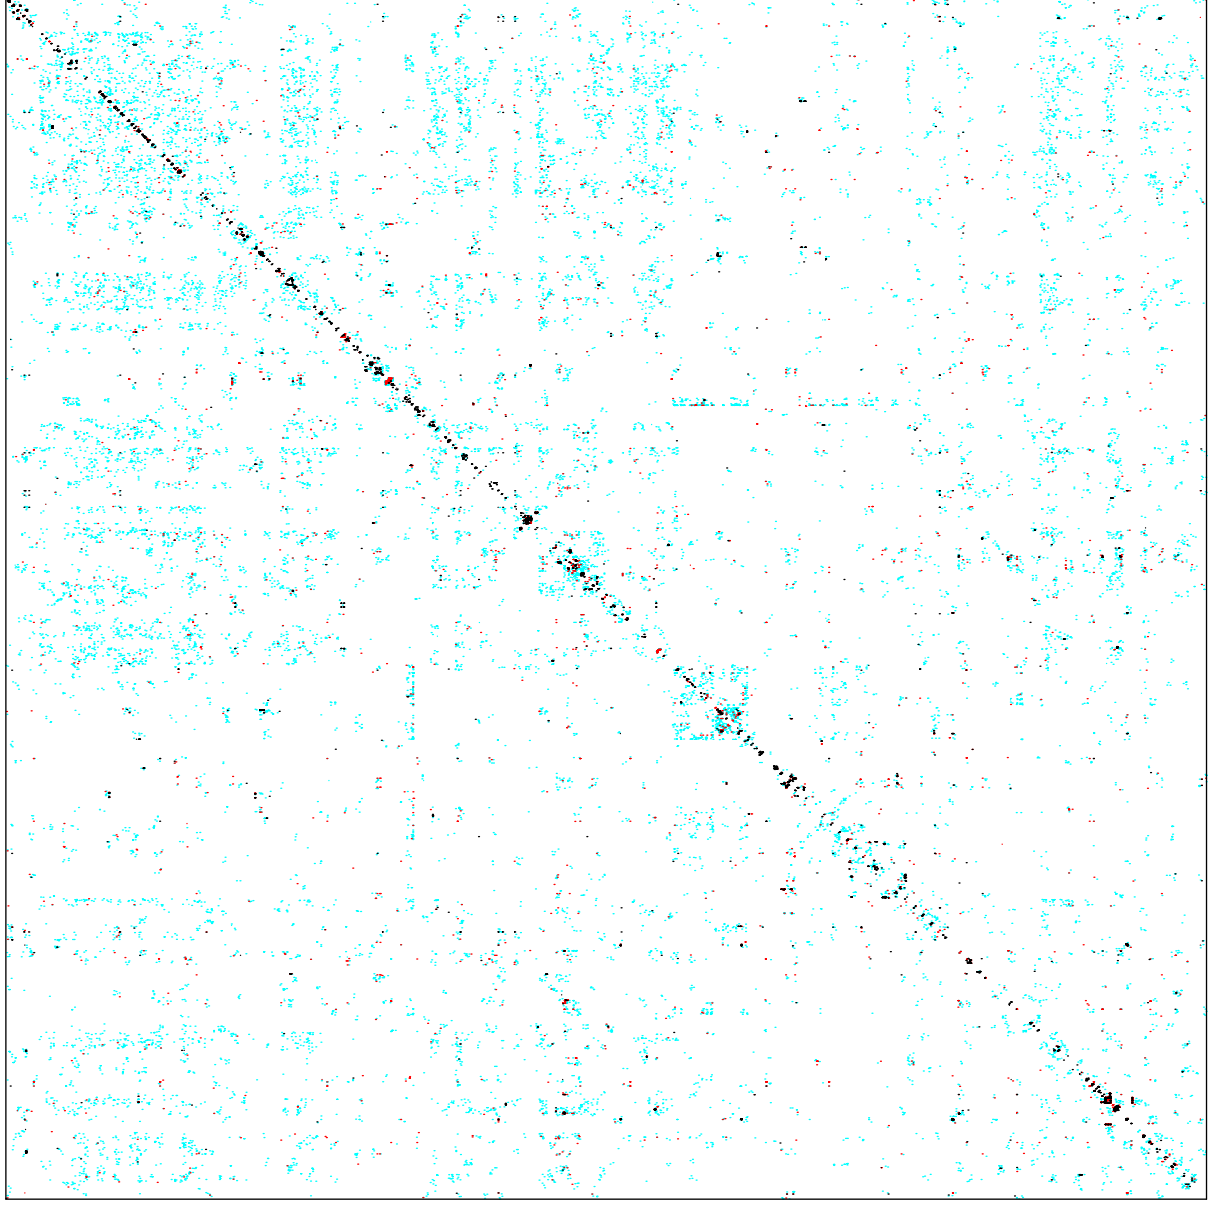

Homology:  
70-79%  
80-89%  
90-100%

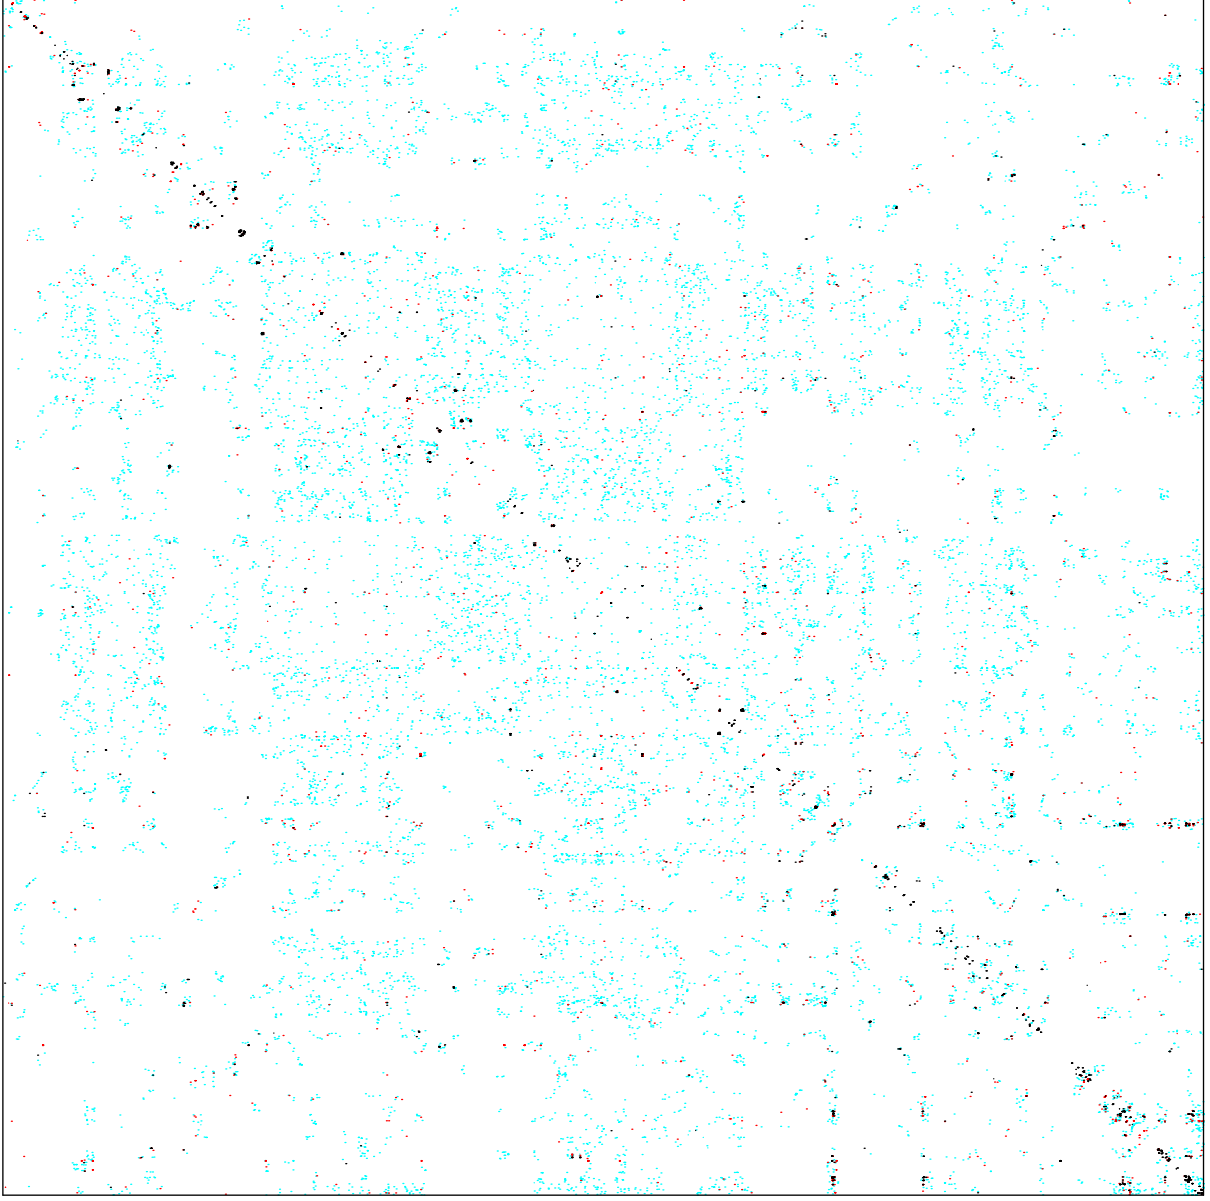

Homology:  
70-79%  
80-89%  
90-100%

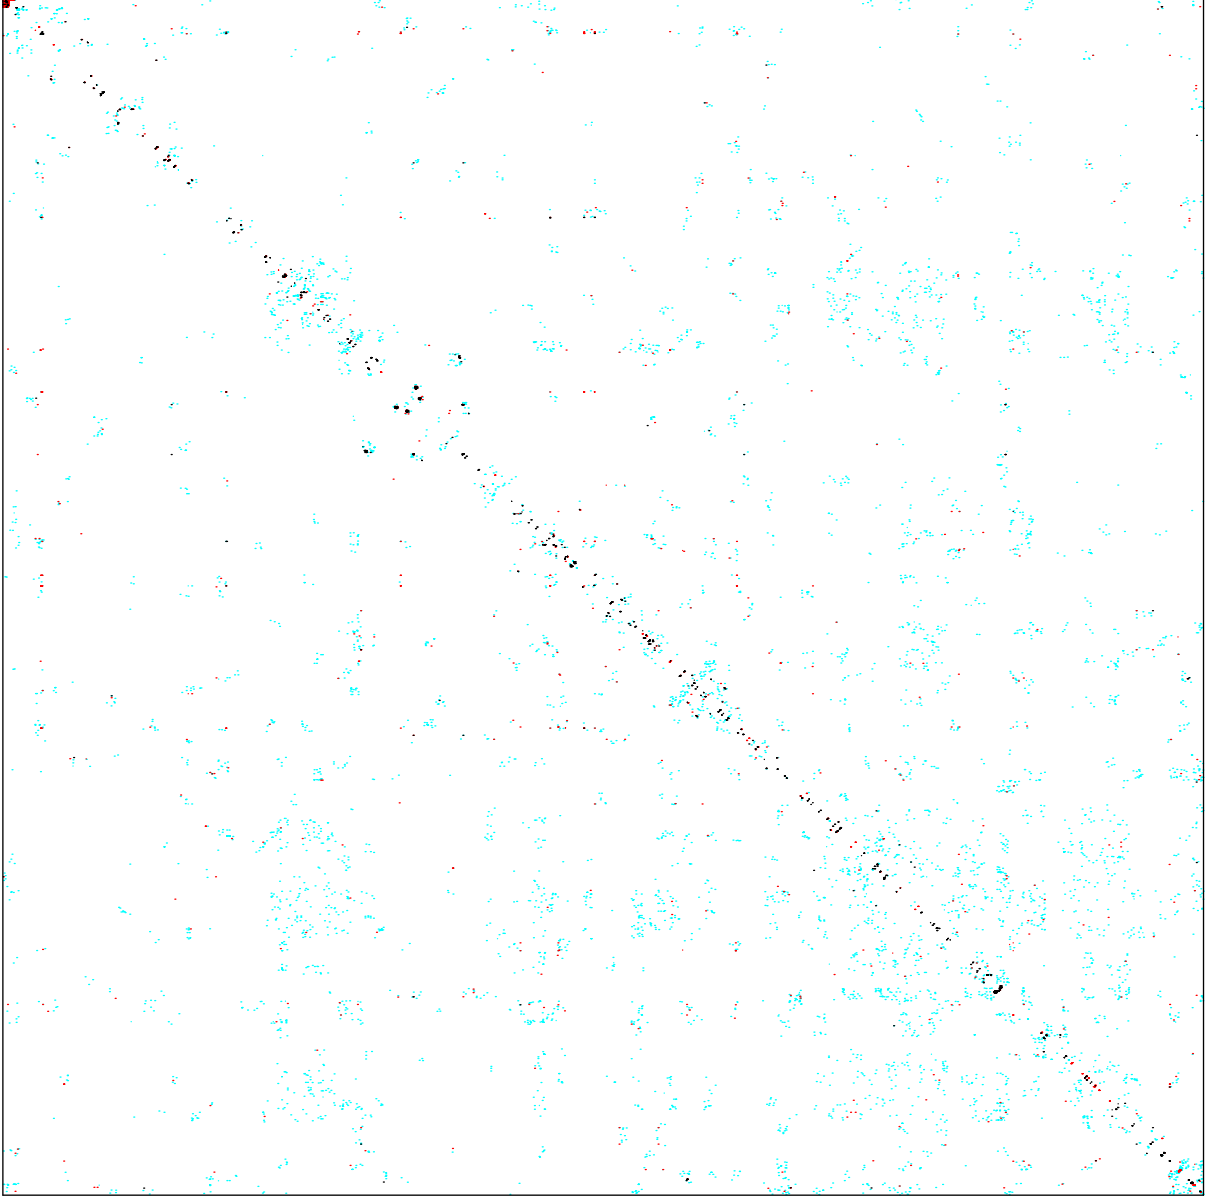

Homology:  
70-79%  
80-89%  
90-100%

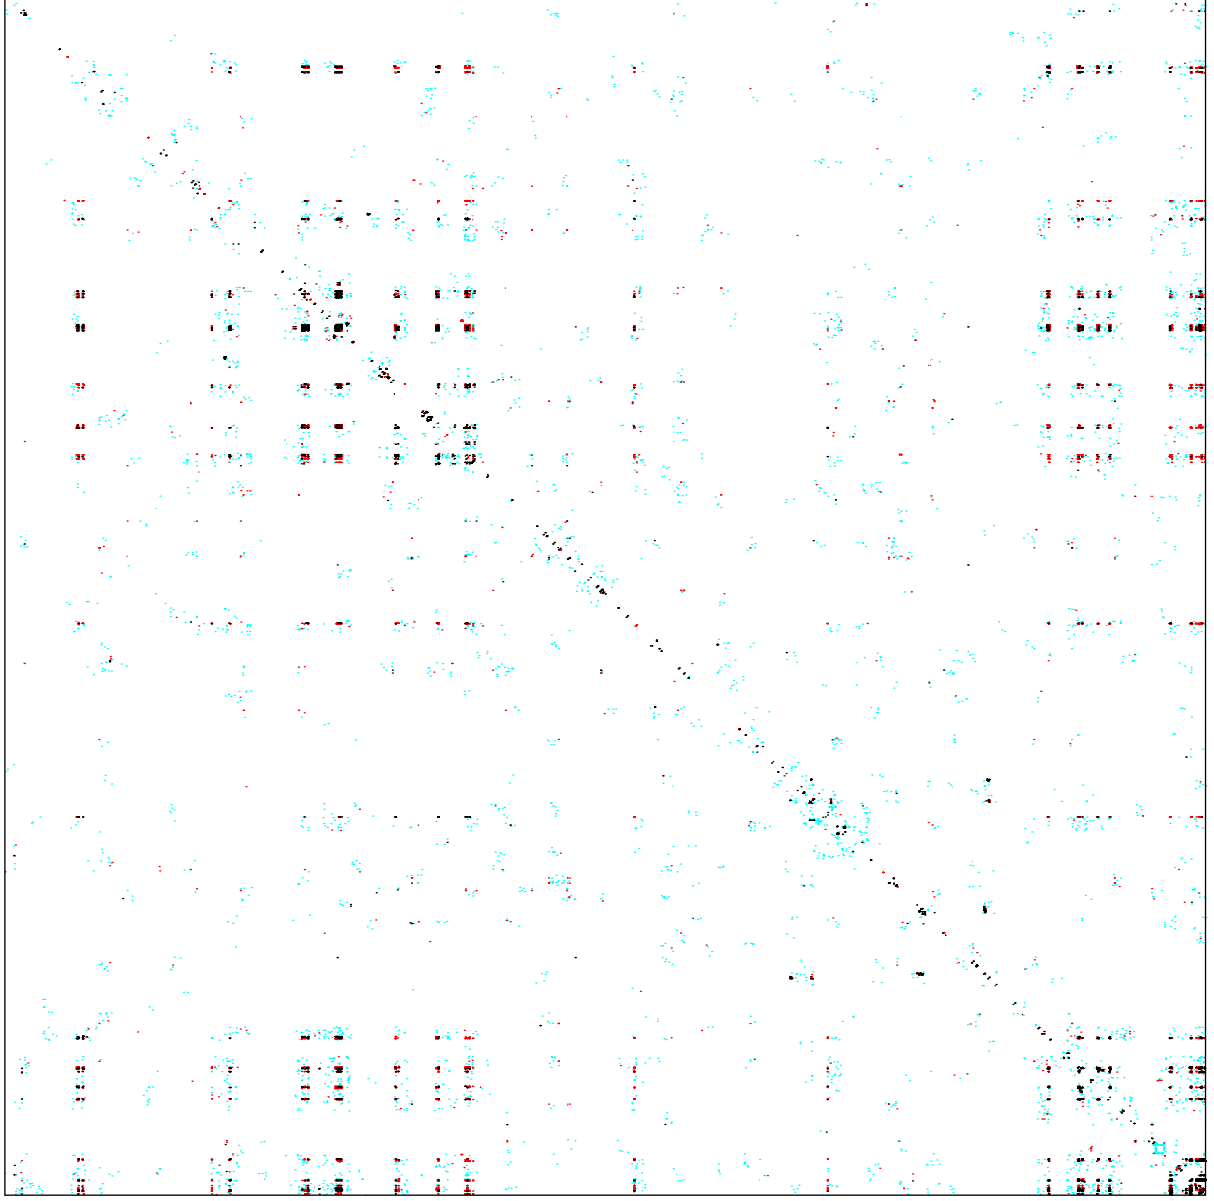

Homology:  
70-79%  
80-89%  
90-100%

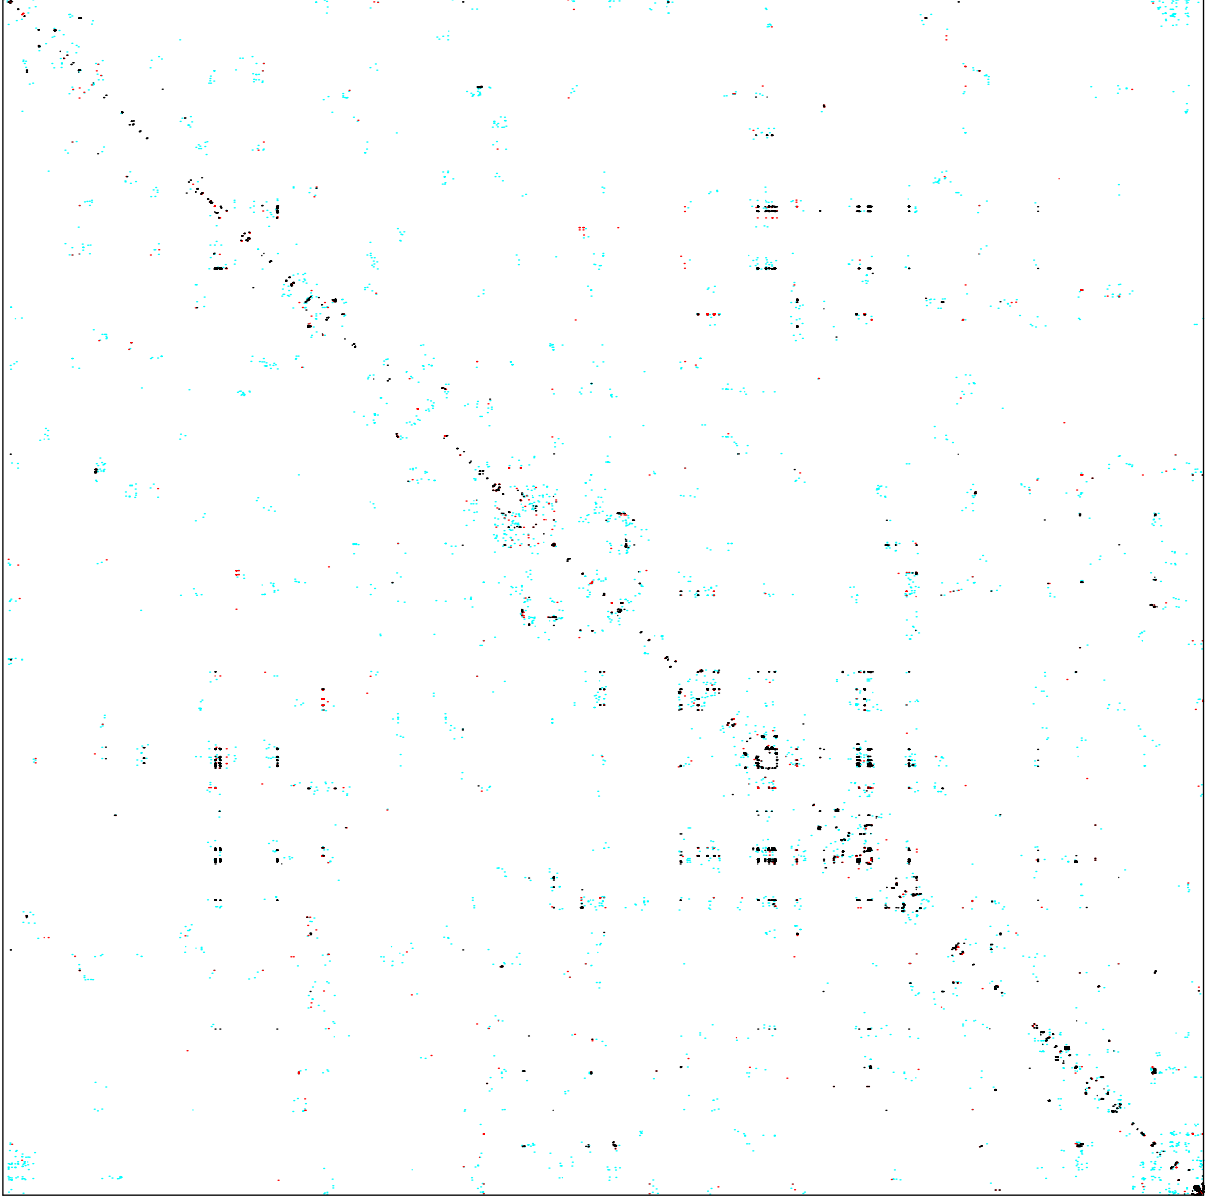

Homology:  
70-79%  
80-89%  
90-100%



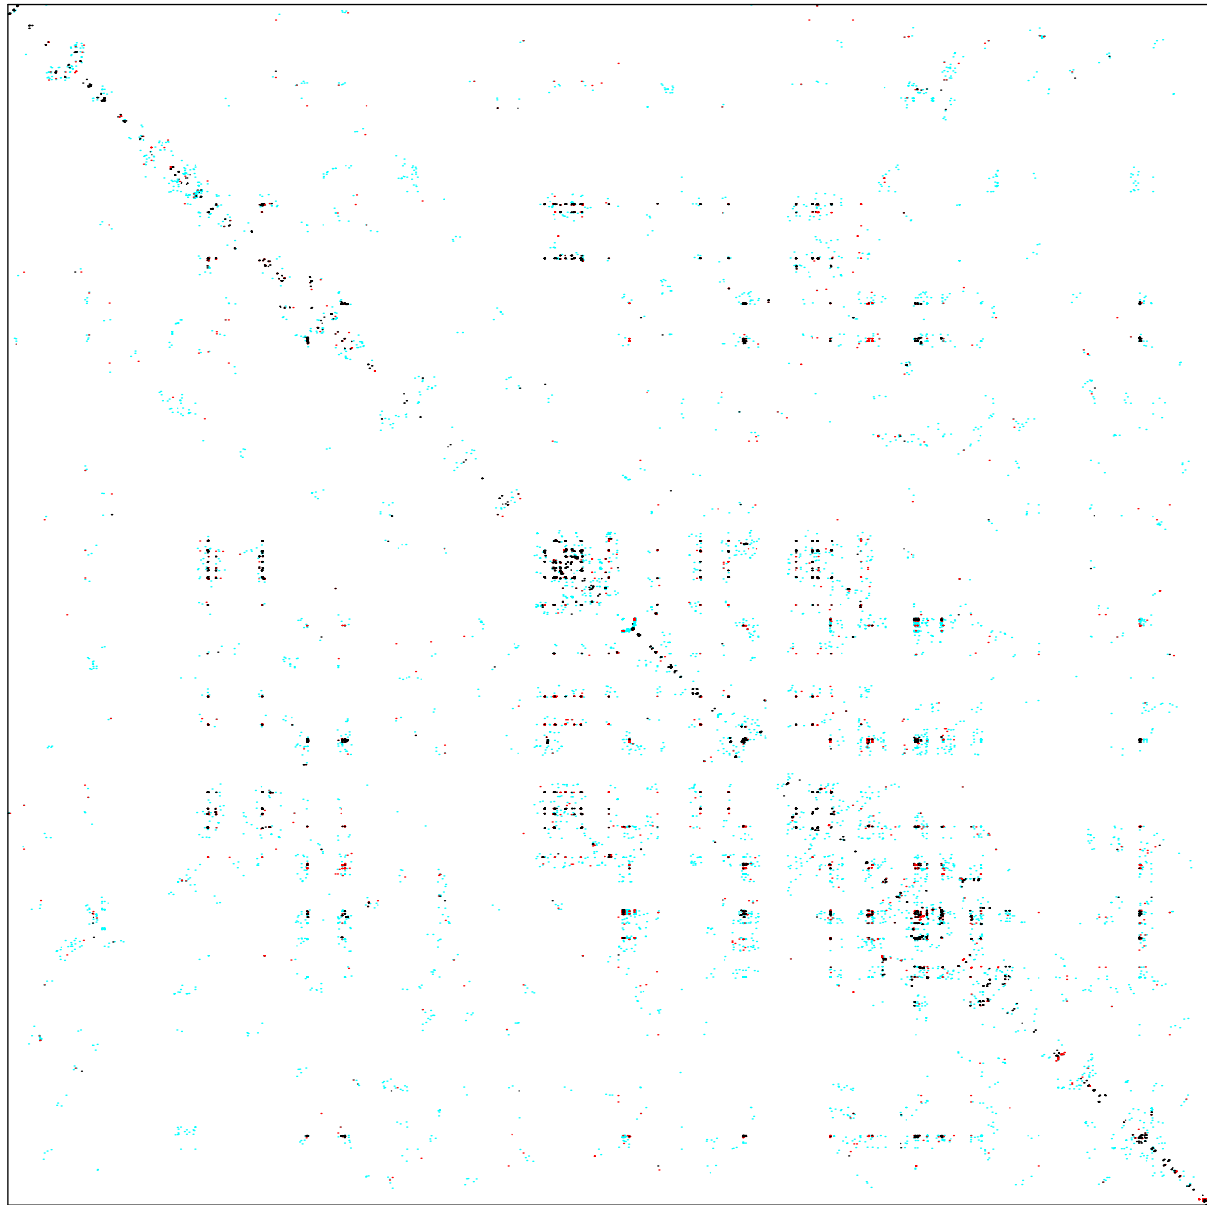

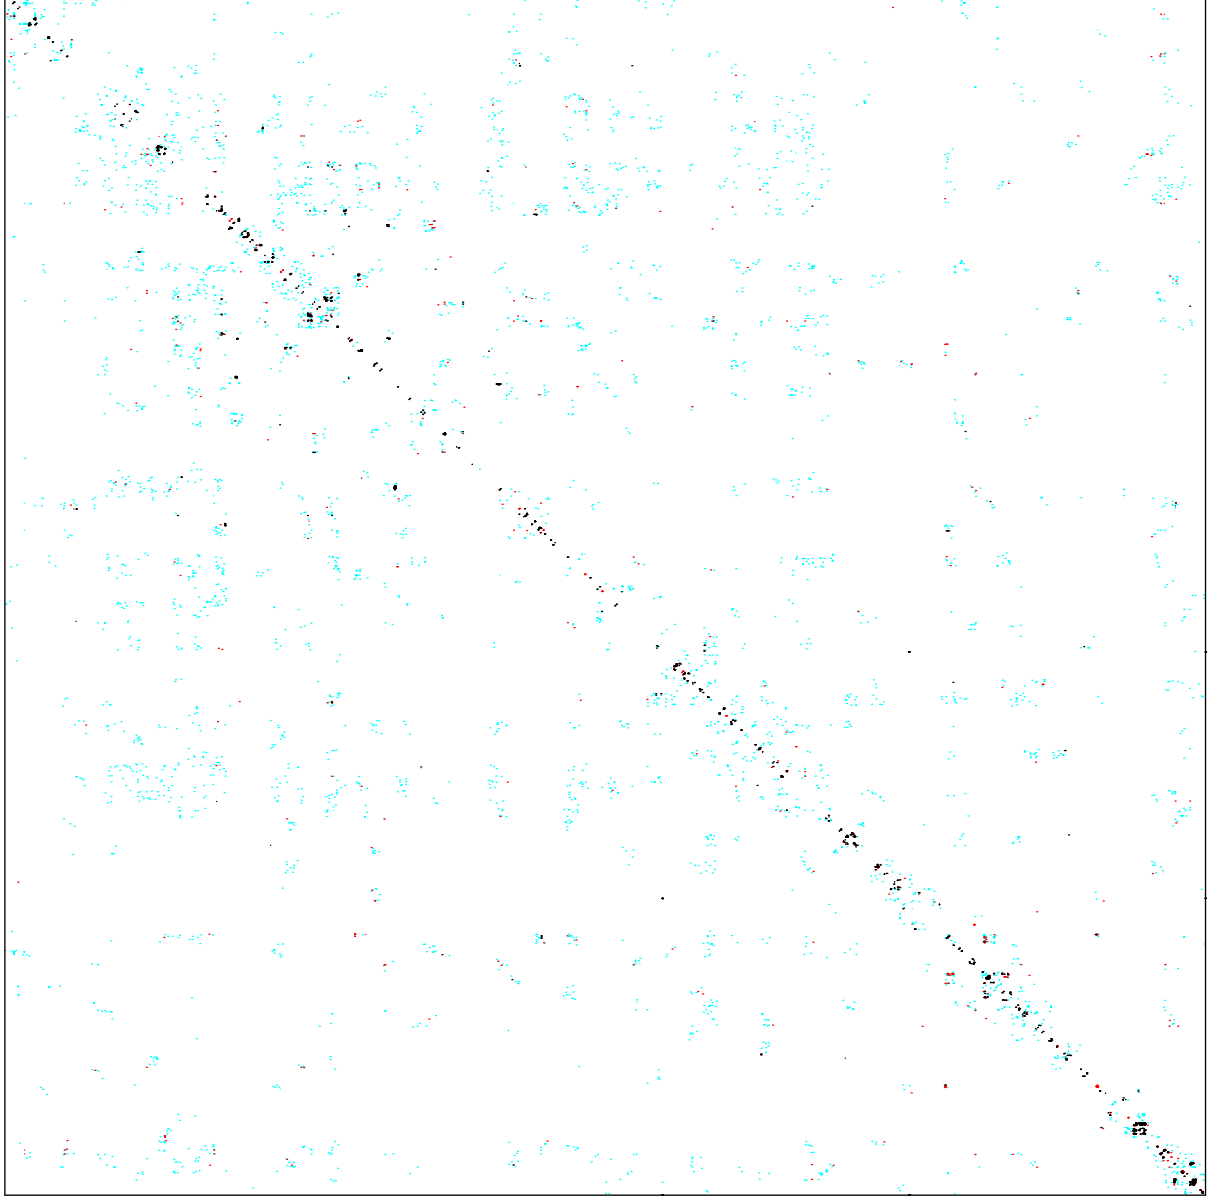

Homology:  
70-79%  
80-89%  
90-100%

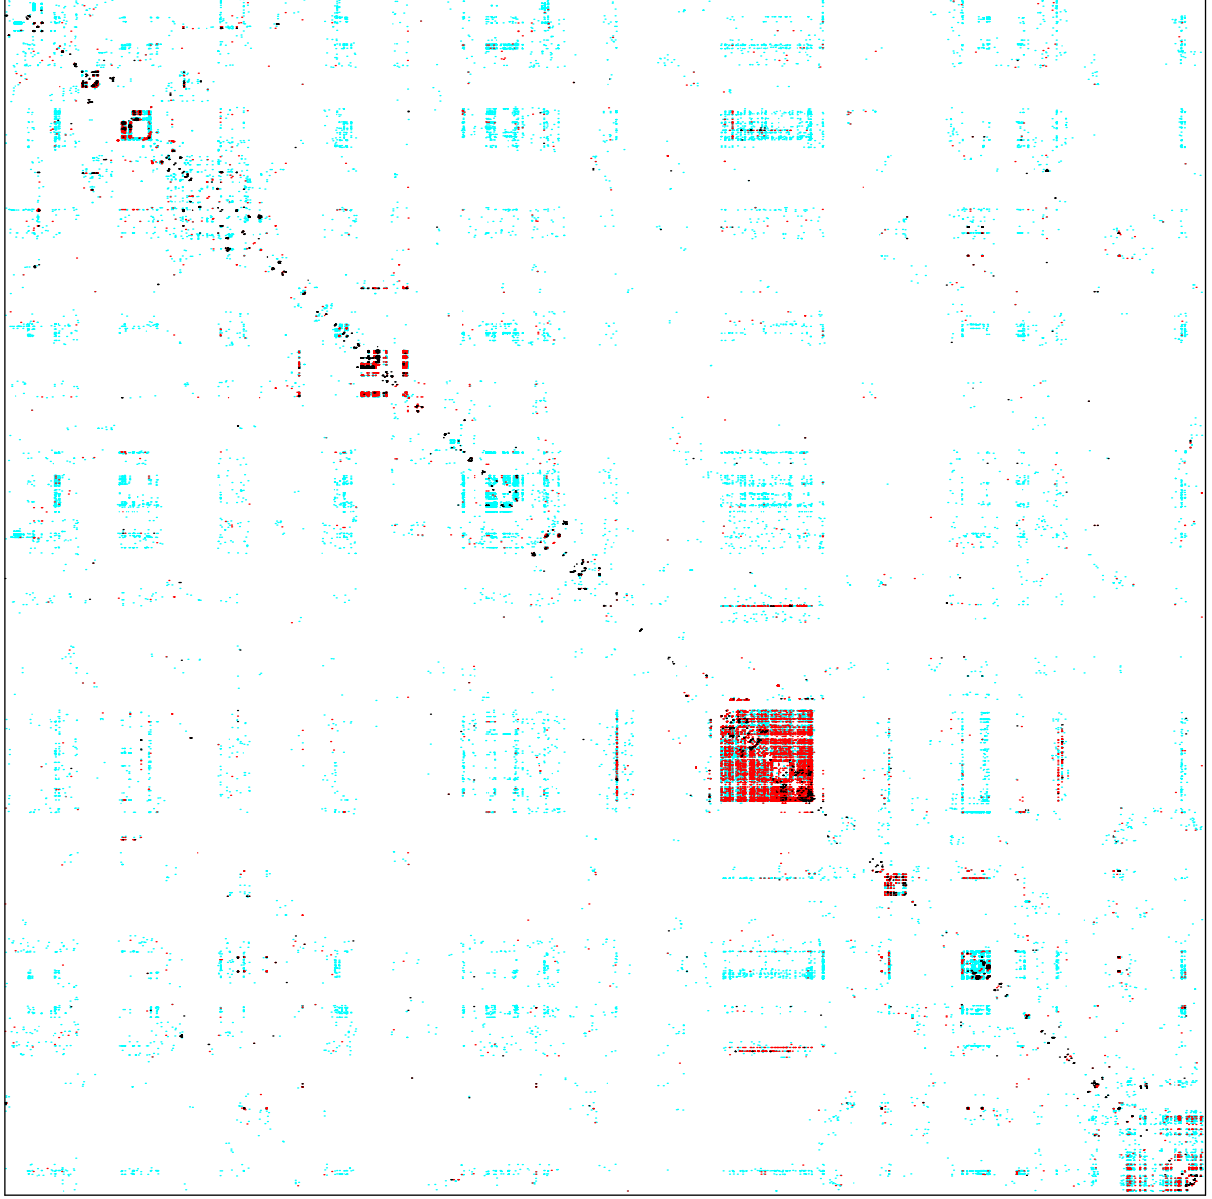

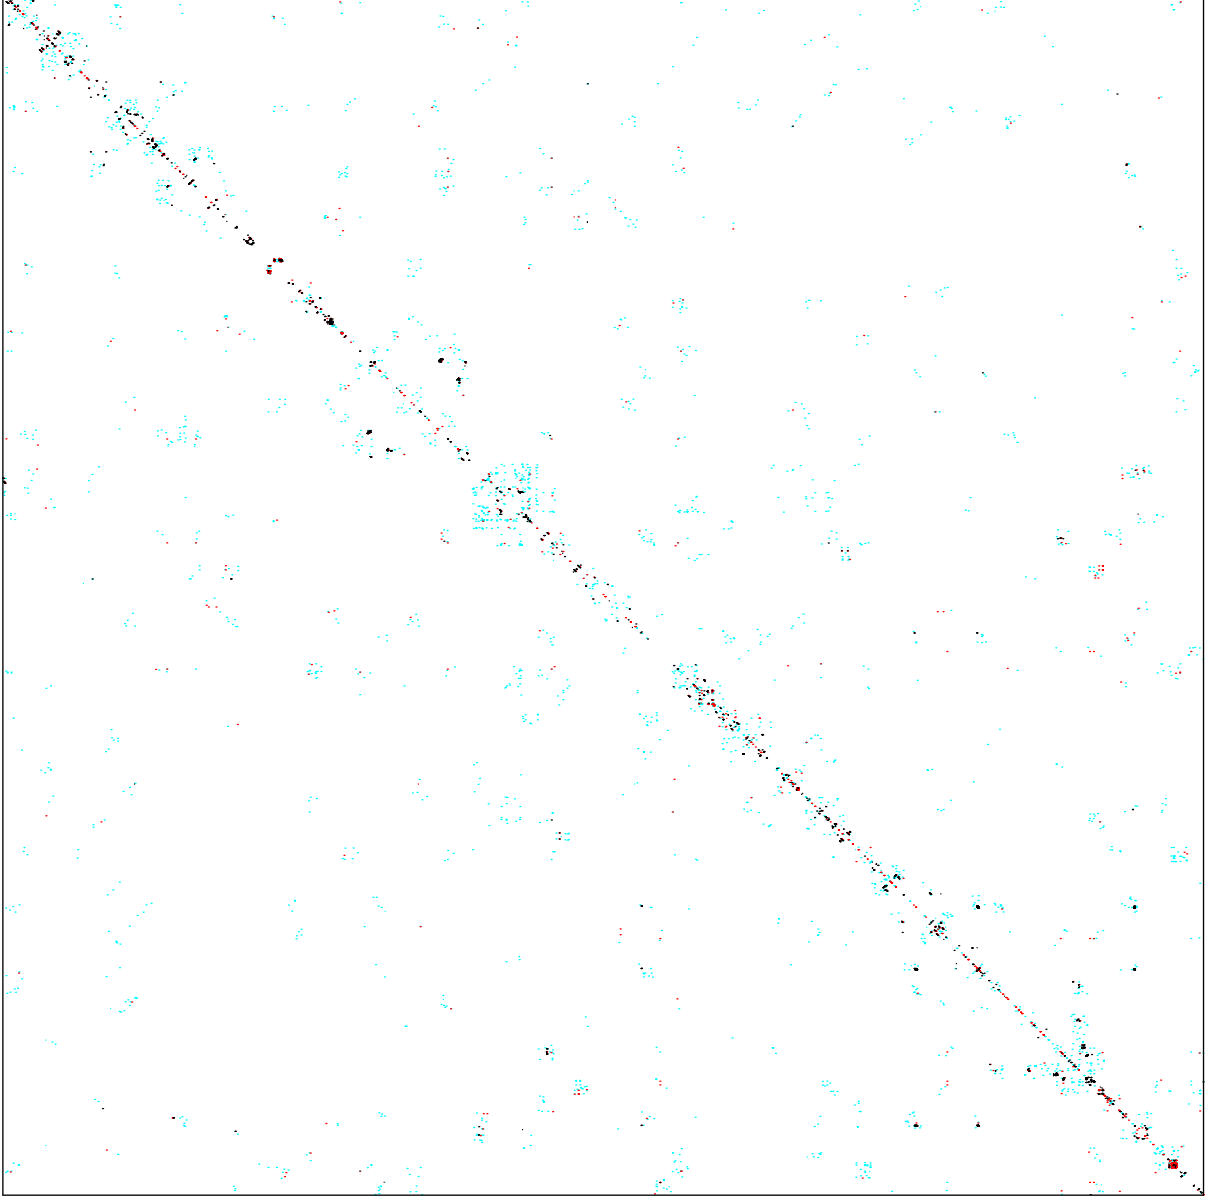

Homology:  
70-79%  
80-89%  
90-100%

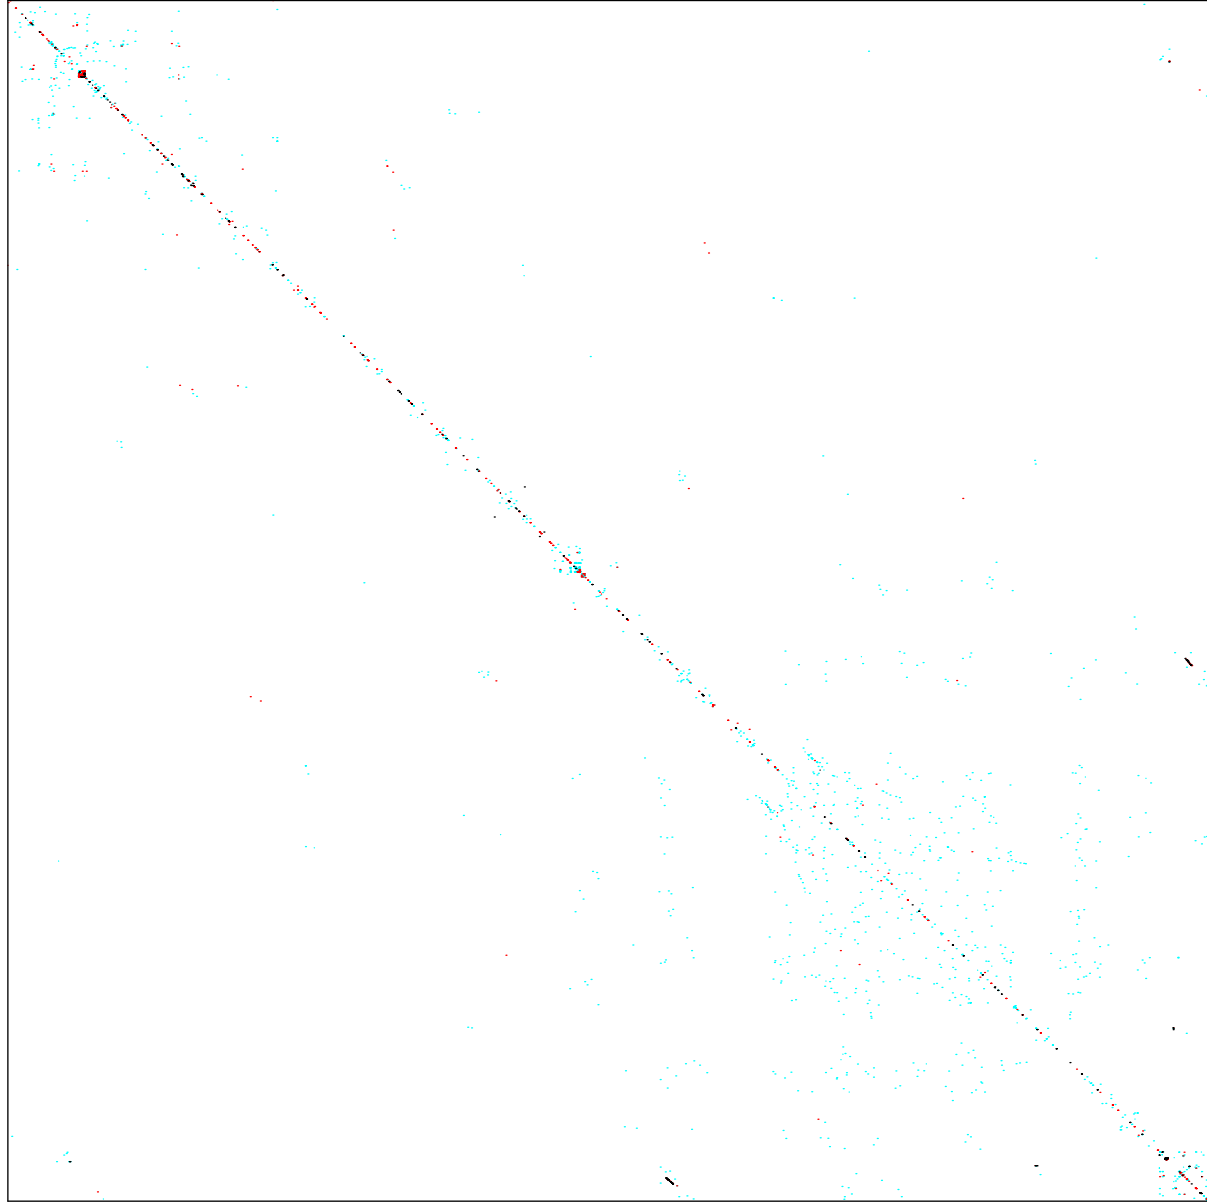

Homology:  
70-79%  
80-89%  
90-100%

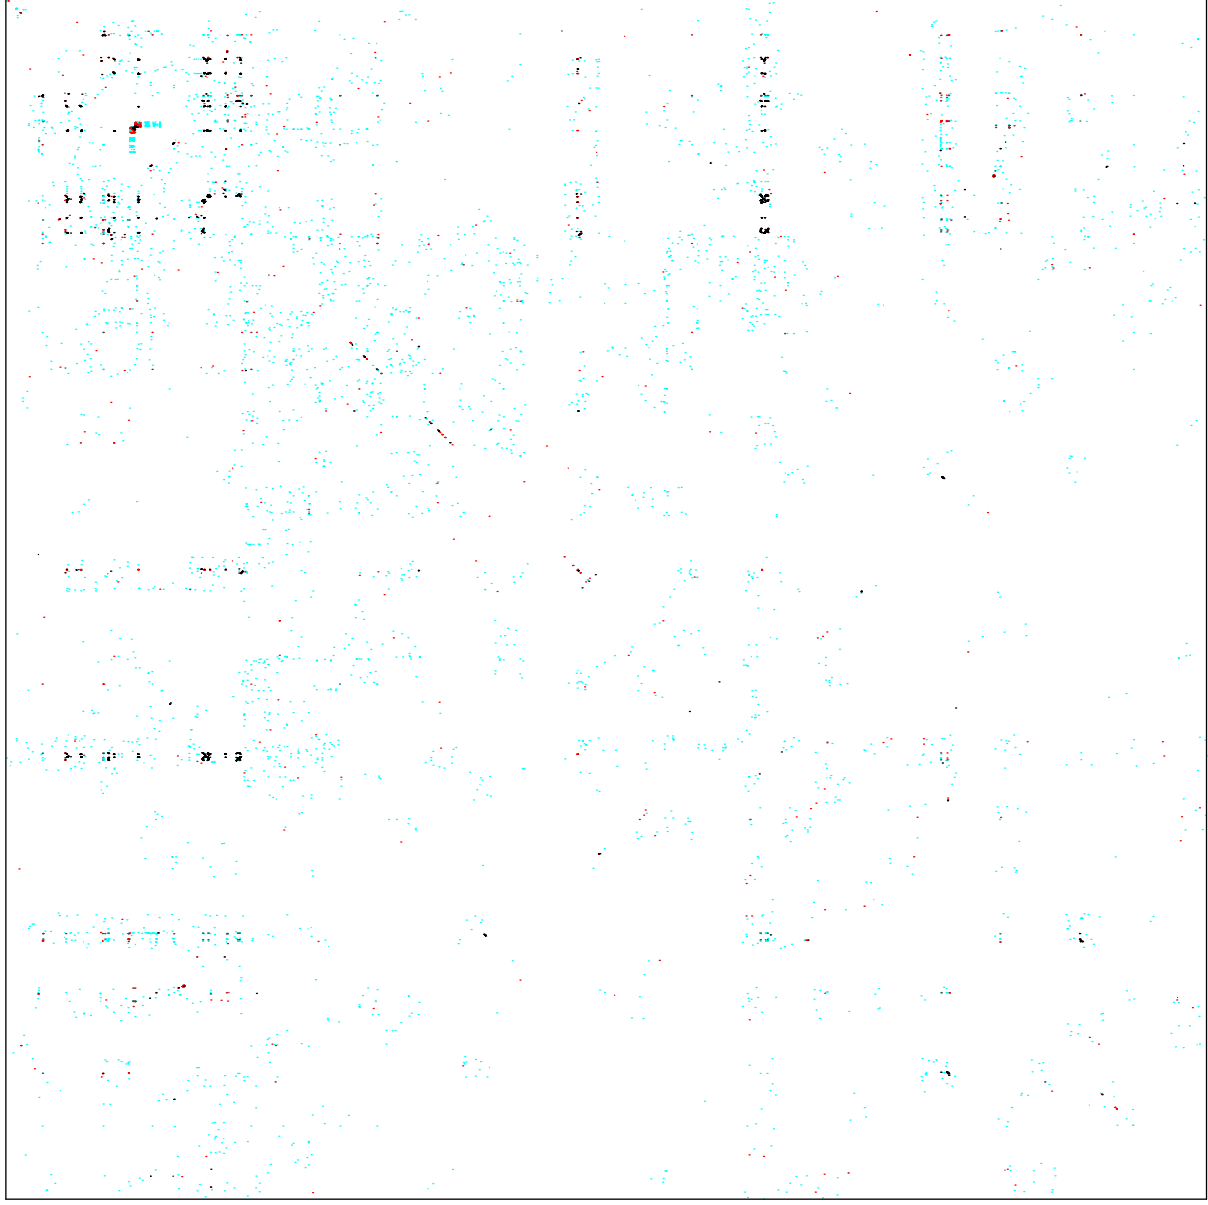

Homology:  
70-79%  
80-89%  
90-100%

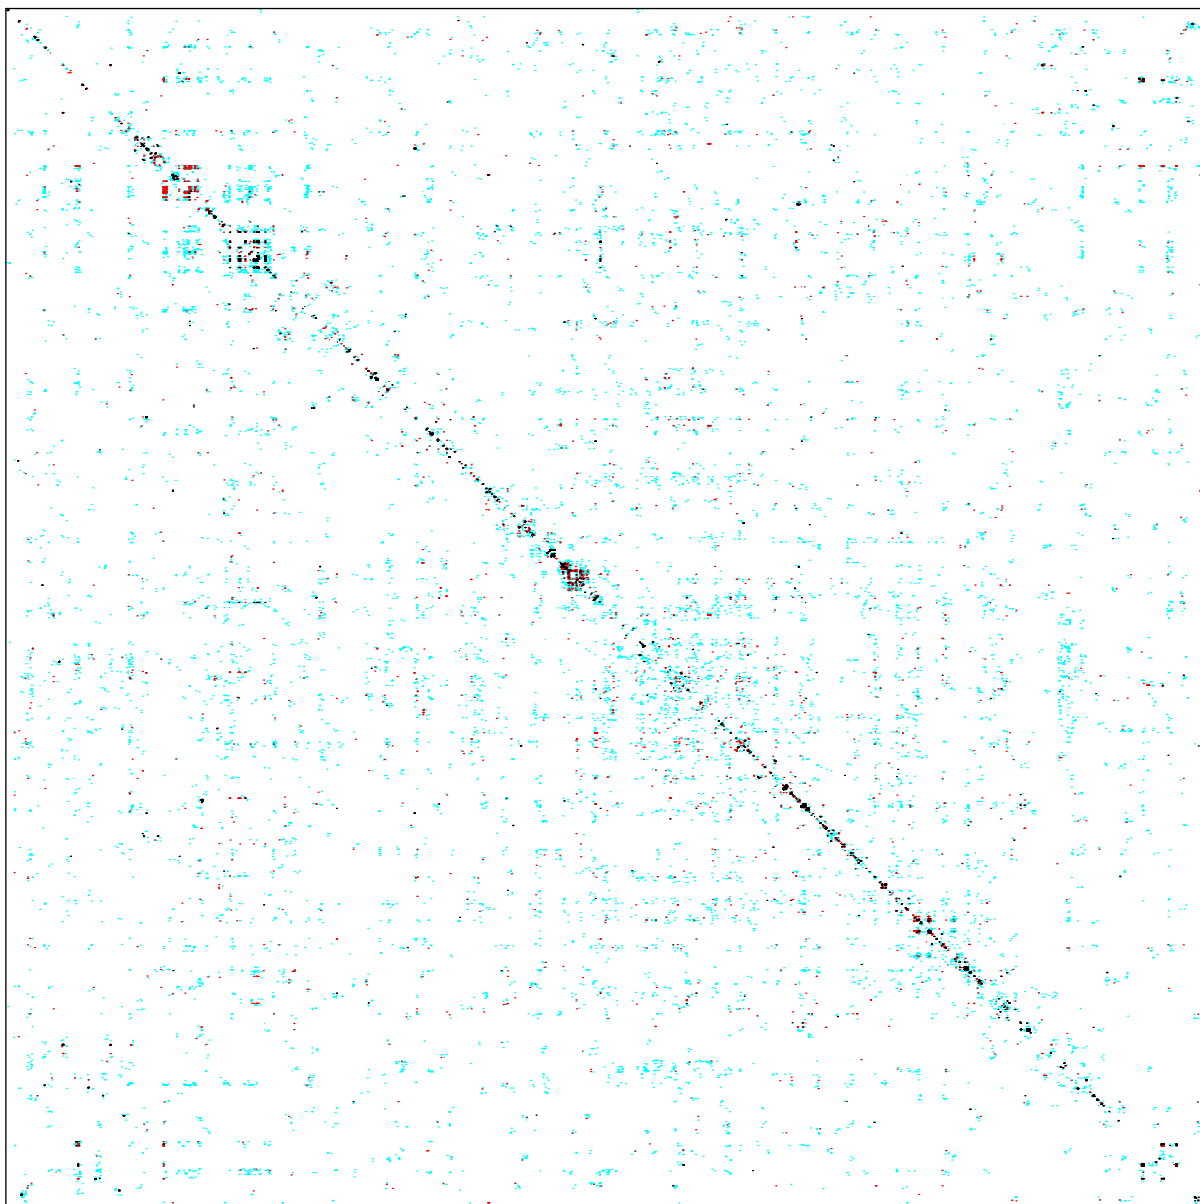

Homology:  
70-79%  
80-89%  
90-100%

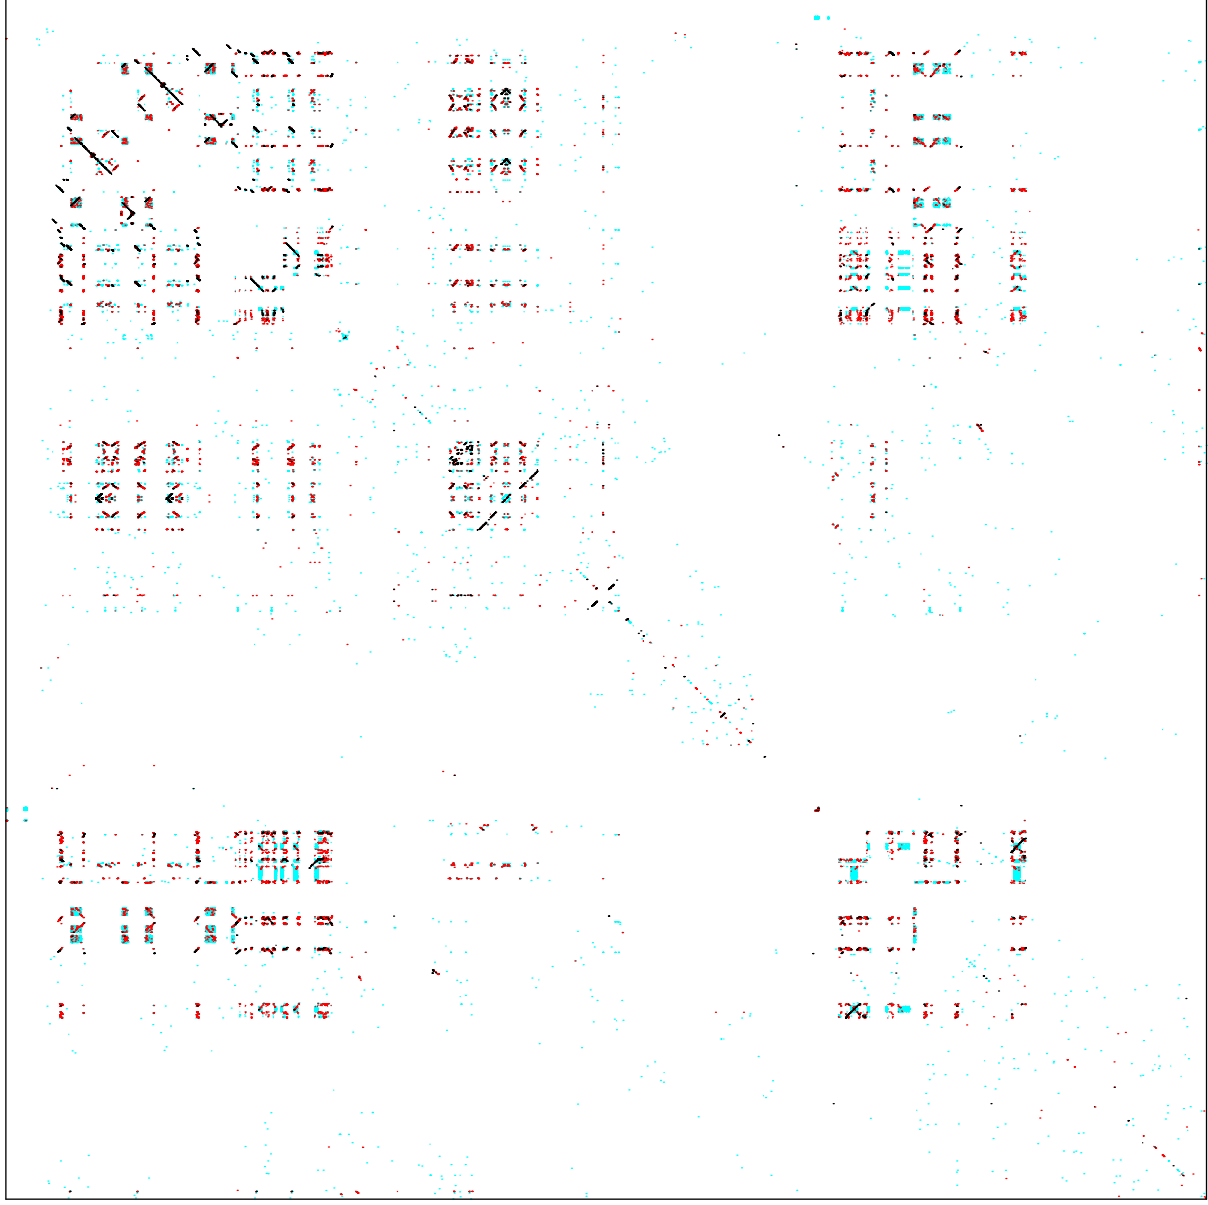

Homology:  
70-79%  
80-89%  
90-100%
