# Supplementary material
Source: PubMed Central journal article supplement (PMC55322)
Supplement: gb-2001-2-7-research0025-S100.pdf [file gb-2001-2-7-research0025-S100.pdf]

1 Nuclear organization.and.biogenesis Nuclear.organization.and.biogenesis DNA.binding DNA.binding Nuclear.organization.and.biogenesis 6 1  
2 Signal.transduction Signal.transduction Signal.transduction Signal.transduction Signal.transduction Signal.transduction 41 2  
3 DNA.binding Nuclear.organization.and.biogenesis Nuclear.organization.and.biogenesis DNA.binding DNA.binding DNA.binding DNA.binding 5 3  
4 Nuclear.organization.and.biogenesis DNA.binding DNA.binding Nuclear.organization.and.biogenesis DNA.binding DNA.binding 3 4  
5 Nucleotide.and.nucleic.acid.metabolism Nucleotide.and.nucleic.acid.metabolism Nucleotide.and.nucleic.acid.metabolism 6 5  
6 Phosphoryl.transfer Phosphoryl.transfer Phosphoryl.transfer Signal.transduction Signal.transduction Signal.transduction 6 6  
7 Ribosomal.protein.ribosomal.protein.ribosomal.protein Signal.transduction Signal.transduction Signal.transduction 3 7  
8 Proteolysis.and.peptidolysis Proteolysis.and.peptidolysis Proteolysis.and.peptidolysis Proteolysis.and.peptidolysis 6 8  
9 Signal.transduction Signal.transduction Signal.transduction Signal.transduction Signal.transduction RNA.binding 3 9  
10 DNA.binding DNA.binding DNA.binding Nuclear.organization.and.biogenesis DNA.binding DNA.binding 3 10  
11 Signal.transduction Signal.transduction Signal.transduction Signal.transduction DNA.replication DNA.replication 4 11  
12 Nuclear.organization.and.biogenesis Nuclear.organization.and.biogenesis Nuclear.organization.and.biogenesis Nuclear.organization.and.biogenesis 3 12  
13 Phosphoryl.transfer Phosphoryl.transfer Phosphoryl.transfer Phosphoryl.transfer Phosphoryl.transfer Phosphoryl.transfer 14 13  
14 Signal.transduction Signal.transduction Nuclear.organization.and.biogenesis Nuclear.organization.and.biogenesis Nuclear.organization.and.biogenesis 6 14  
15 Cytoskeleton.structural.protein Cytoskeleton.structural.protein Cytoskeleton.structural.protein Cytoskeleton.structural.protein 3 15  
16 Protein.kinase Protein.kinase Protein.kinase Nuclear.organization.and.biogenesis Nuclear.organization.and.biogenesis 5 16  
17 Cell.adhesion Cell.adhesion Cell.adhesion Cell.adhesion Sensory.perception 3 17  
18 Extracellular.matrix Signal.transduction Signal.transduction Signal.transduction Signal.transduction Signal.transduction 5 18  
19 Nuclear.organization.and.biogenesis Electron.transport Electron.transport Electron.transport Electron.transport Electron.transport 11 19  
20 Ligand.binding.or.carrier Ligand.binding.or.carrier Ligand.binding.or.carrier Ligand.binding.or.carrier Ligand.binding.or.carrier 25 20  
21 Ribosomal.protein Nuclear.organization.and.biogenesis Nuclear.organization.and.biogenesis Nuclear.organization.and.biogenesis Signal.transduction 3 21  
22 Cell.adhesion Cell.adhesion Cell.adhesion Cell.adhesion Cell.adhesion Cell.adhesion 9 23  
23 Extracellular.matrix Extracellular.matrix Extracellular.matrix Extracellular.matrix Extracellular.matrix 5 24  
24 Nuclear.organization.and.biogenesis DNA.binding Nuclear.organization.and.biogenesis DNA.binding DNA.binding DNA.binding 5 24  
25 Protein.kinase Protein.kinase Protein.kinase Nuclear.organization.and.biogenesis Nuclear.organization.and.biogenesis 3 25  
26 Ribosomal.protein Nuclear.organization.and.biogenesis Nuclear.organization.and.biogenesis Nuclear.organization.and.biogenesis 8 26  
27 Signal.transduction Protein.kinase Protein.kinase Protein.kinase Protein.kinase 4 27  
28 Protein.kinase Protein.kinase Protein.kinase Protein.kinase Protein.modification Protein.modification 3 28  
29 Ion.channel Ion.channel Ion.channel Ion.channel Ion.channel Signal.transduction 3 29  
30 Ribosomal.protein Ligand.binding.or.carrier Ligand.binding.or.carrier Ligand.binding.or.carrier Ligand.binding.or.carrier 4 30  
31 Lipid.metabolism Lipid.metabolism Lipid.metabolism Lipid.metabolism Lipid.metabolism Ribosomal.protein 3 31  
32 Nuclear.organization.and.biogenesis Nuclear.organization.and.biogenesis Nuclear.organization.and.biogenesis Nuclear.organization.and.biogenesis 3 32  
33 Phosphoryl.transfer Phosphoryl.transfer Phosphoryl.transfer Cell.adhesion Cell.adhesion 3 33  
34 Lipid.metabolism Lipid.metabolism Lipid.metabolism Protein.kinase Protein.kinase Protein.kinase 3 34  
35 Nuclear.organization.and.biogenesis Nuclear.organization.and.biogenesis Nuclear.organization.and.biogenesis Carboxyl.transfer Nuclear.organization.and.biogenesis 4 35  
36 Ribosomal.protein Protein.kinase Protein.kinase Protein.kinase Protein.kinase 3 36  
37 Cell.adhesion Cell.adhesion Cell.adhesion Cell.adhesion Ribosomal.protein Ribosomal.protein 5 37  
38 DNA.binding DNA.binding Nuclear.organization.and.biogenesis Nuclear.organization.and.biogenesis Nuclear.organization.and.biogenesis 8 38  
39 RNA.processing RNA.processing RNA.processing RNA.processing RNA.processing RNA.processing 5 39  
40 DNA.binding Nuclear.organization.and.biogenesis Nuclear.organization.and.biogenesis DNA.binding DNA.binding Nuclear.organization.and.biogenesis 7 40  
41 Nuclear.organization.and.biogenesis DNA.binding DNA.binding Nuclear.organization.and.biogenesis DNA.binding Nuclear.organization.and.biogenesis 4 41  
42 DNA.binding Nuclear.organization.and.biogenesis DNA.binding Nuclear.organization.and.biogenesis Nuclear.organization.and.biogenesis DNA.binding 3 42  
43 Electron.transport Electron.transport Electron.transport Electron.transport Electron.transport 11 43  
44 DNA.replication DNA.replication DNA.replication DNA.replication DNA.replication DNA.replication 3 44  
45 Nuclear.organization.and.biogenesis Nuclear.organization.and.biogenesis DNA.binding DNA.binding DNA.binding DNA.binding 13 45  
46 Nuclear.organization.and.biogenesis Nuclear.organization.and.biogenesis Nuclear.organization.and.biogenesis Nuclear.organization.and.biogenesis 6 46  
47 Ion.homeostasis Nuclear.organization.and.biogenesis Nuclear.organization.and.biogenesis Nuclear.organization.and.biogenesis 3 47  
48 Nuclear.organization.and.biogenesis Nuclear.organization.and.biogenesis Nuclear.organization.and.biogenesis Protein.kinase Protein.kinase 6 48  
49 Lipid.metabolism Lipid.metabolism Lipid.metabolism Lipid.metabolism Lipid.metabolism Ribosomal.protein 3 49  
50 Protease.inhibitor Protease.inhibitor Protease.inhibitor Protease.inhibitor Protease.inhibitor Protease.inhibitor 7 50  
51 Extracellular.matrix Extracellular.matrix Extracellular.matrix Extracellular.matrix Extracellular.matrix Ligand.binding.or.carrier 3 51  
52 Signal.transduction Signal.transduction Signal.transduction Signal.transduction Signal.transduction DNA.replication 3 52  
53 DNA.binding DNA.binding DNA.binding DNA.binding DNA.binding DNA.binding 11 53  
54 Cytoskeleton.structural.protein Cytoskeleton.structural.protein Cytoskeleton.structural.protein Cytoskeleton.structural.protein 5 54  
55 Cell.adhesion Cell.adhesion Cell.adhesion Cell.adhesion Ribosomal.protein Ribosomal.protein 5 55  
56 Ligand.binding.or.carrier Ligand.binding.or.carrier Ligand.binding.or.carrier Ligand.binding.or.carrier Electron.transport 3 56  
57 Lipid.metabolism Lipid.metabolism Lipid.metabolism Lipid.metabolism Lipid.metabolism Protein.kinase 3 57  
58 Cytoskeleton.structural.protein Cytoskeleton.structural.protein Cytoskeleton.structural.protein Cytoskeleton.structural.protein 3 58  
59 Lipid.metabolism Signal.transduction Signal.transduction Signal.transduction Signal.transduction Signal.transduction 3 59  
60 Protein.degradation DNA.replication Protein.degradation Protein.degradation Protein.degradation DNA.replication 3 60  
61 Translation.factor Translation.factor Translation.factor Translation.factor Translation.factor Translation.factor 3 61  
62 Nuclear.organization.and.biogenesis Nuclear.organization.and.biogenesis Nuclear.organization.and.biogenesis Nuclear.organization.and.biogenesis 3 62  
63 Signal.transduction Signal.transduction Protein.kinase Protein.kinase Protein.kinase Protein.kinase 4 63  
64 Nuclear.organization.and.biogenesis Nuclear.organization.and.biogenesis Protein.kinase Protein.kinase Ribosomal.protein 3 64  
65 Defense/immunity.protein Defense/immunity.protein Defense/immunity.protein Defense/immunity.protein Extracellular.matrix 3 65  
66 Signal.transduction Signal.transduction Phosphoryl.transfer Phosphoryl.transfer Phosphoryl.transfer Phosphoryl.transfer 4 66  
67 Phosphoryl.transfer Ligand.binding.or.carrier Ligand.binding.or.carrier Ligand.binding.or.carrier Ion.transport Ion.transport 3 67  
68 Phosphoryl.transfer DNA.replication DNA.replication DNA.replication DNA.replication DNA.replication DNA.replication 4 68  
69 Ion.channel Ion.channel Ion.channel Ion.channel Ion.channel Ion.channel 10 70  
70 Cell.adhesion Cell.adhesion Ligand.binding.or.carrier Cell.adhesion Cell.adhesion Cell.adhesion 4 71  
71 Motor.protein Motor.protein Motor.protein Motor.protein Motor.protein Motor.protein 6 72  
72 Protein.kinase Protein.kinase Protein.kinase Protein.kinase Protein.kinase Protein.modification 3 73

74 Nuclear.organiZation.and.biogenesis Defense/immunity.protein Defense/immunity.protein 6 74  
75 Protein.kinase Nuclear.organiZation.and.biogenesis Nuclear.organiZation.and.biogenesis Nuclear.organiZation.and.biogenesis 6 74  
76 DNA.binding Nuclear.organiZation.and.biogenesis Nuclear.organiZation.and.biogenesis DNA.binding Nuclear.organiZation.and.biogenesis 9 76  
77 Nuclear.organiZation.and.biogenesis Nuclear.organiZation.and.biogenesis Nuclear.organiZation.and.biogenesis Signal.transduction 5 77  
78 Cell.cycle Cell.cycle Ribosomal.protein Ribosomal.protein 3 78  
79 Signal.transduction Signal.transduction Extracellular.matrix Extracellular.matrix 3 79  
80 Electron.transport Electron.transport Nuclear.organiZation.and.biogenesis Nuclear.organiZation.and.biogenesis 4 80  
81 Cell.adhesion Cell.adhesion Nuclear.organiZation.and.biogenesis Nuclear.organiZation.and.biogenesis Nuclear.organiZation.and.biogenesis 3 81  
82 DNA.binding Nuclear.organiZation.and.biogenesis Nuclear.organiZation.and.biogenesis DNA.binding DNA.binding 4 82  
83 Nuclear.organiZation.and.biogenesis DNA.binding Nuclear.organiZation.and.biogenesis DNA.binding 8 83  
84 Signal.transduction Signal.transduction DNA.binding DNA.binding 4 84  
85 Nuclear.organiZation.and.biogenesis Nuclear.organiZation.and.biogenesis DNA.replication DNA.replication 4 85  
86 Signal.transduction Signal.transduction Signal.transduction Ribosomal.protein 7 86  
87 Nuclear.organiZation.and.biogenesis Nuclear.organiZation.and.biogenesis Phosphoryl.transfer Phosphoryl.transfer 5 87  
88 DNA.binding Nuclear.organiZation.and.biogenesis Nuclear.organiZation.and.biogenesis Nuclear.organiZation.and.biogenesis 4 88  
89 Tumor.suppressor Tumor.suppressor Tumor.suppressor 5 89  
90 Lipid.metabolism Ribosomal.protein Nuclear.organiZation.and.biogenesis Nuclear.organiZation.and.biogenesis Nuclear.organiZation.and.biogenesis 3 90  
91 RNA.binding RNA.binding Nuclear.organiZation.and.biogenesis RNA.binding RNA.binding 3 91  
92 Nuclear.organiZation.and.biogenesis Nuclear.organiZation.and.biogenesis Nuclear.organiZation.and.biogenesis Protein.kinase Protein.kinase 4 92  
93 Defense/immunity.protein Defense/immunity.protein Defense/immunity.protein Defense/immunity.protein 50 93  
94 Lipid.metabolism Protein.kinase Protein.kinase Lipid.metabolism Lipid.metabolism 3 94  
95 Cytoskeleton.structural.protein Cytoskeleton.structural.protein Ligand.binding.or.carrier Ligand.binding.or.carrier 3 95  
96 Protein.biosynthesis Nuclear.organiZation.and.biogenesis Nuclear.organiZation.and.biogenesis Nuclear.organiZation.and.biogenesis Nuclear.organiZation.and.biogenesis 3 95  
97 Carboxyl.transfer Carboxyl.transfer Carboxyl.transfer Carboxyl.transfer 3 97  
98 Signal.transduction Signal.transduction Signal.transduction DNA.binding 3 98  
99 DNA.binding Nuclear.organiZation.and.biogenesis Nuclear.organiZation.and.biogenesis DNA.binding Nuclear.organiZation.and.biogenesis 4 99  
100 Nuclear.organiZation.and.biogenesis Nuclear.organiZation.and.biogenesis Nuclear.organiZation.and.biogenesis Nuclear.organiZation.and.biogenesis 4 100  
101 Nuclear.organiZation.and.biogenesis DNA.binding Nuclear.organiZation.and.biogenesis DNA.binding DNA.binding 5 101  
102 Nuclear.organiZation.and.biogenesis Nuclear.organiZation.and.biogenesis DNA.binding DNA.binding 4 102  
103 Nuclear.organiZation.and.biogenesis Nuclear.organiZation.and.biogenesis Signal.transduction Signal.transduction 6 103  
104 Lipid.metabolism Lipid.metabolism Lipid.metabolism Nuclear.organiZation.and.biogenesis Nuclear.organiZation.and.biogenesis 3 104  
105 Cell.cycle Cell.cycle Cell.cycle 5 105  
106 Ribosomal.protein DNA.binding DNA.binding DNA.binding 3 106  
107 Ion.transport Ion.transport Ion.transport Ion.transport 11 107  
108 Phosphoryl.transfer Signal.transduction Signal.transduction Signal.transduction Signal.transduction 5 108  
109 Defense/immunity.protein Phosphoryl.transfer Phosphoryl.transfer Phosphoryl.transfer 3 109  
110 Lipid.metabolism Lipid.metabolism Ribosomal.protein Nuclear.organiZation.and.biogenesis Nuclear.organiZation.and.biogenesis 3 110  
111 Phosphoryl.transfer Phosphoryl.transfer Signal.transduction Signal.transduction 3 111  
112 Cell.communication Cell.communication Cell.communication Cell.communication 3 112  
113 Signal.transduction Signal.transduction Ribosomal.protein Ribosomal.protein Signal.transduction 3 113  
114 Electron.transport Nuclear.organiZation.and.biogenesis Electron.transport Electron.transport Electron.transport 3 114  
115 Signal.transduction Signal.transduction Signal.transduction DNA.replication 3 115  
116 DNA.binding Nuclear.organiZation.and.biogenesis Nuclear.organiZation.and.biogenesis Nuclear.organiZation.and.biogenesis 6 116  
117 Nuclear.organiZation.and.biogenesis Nuclear.organiZation.and.biogenesis Nuclear.organiZation.and.biogenesis Cell.adhesion 3 117  
118 Nuclear.organiZation.and.biogenesis Nuclear.organiZation.and.biogenesis Nuclear.organiZation.and.biogenesis Ribosomal.protein Ribosomal.protein 3 118  
119 Nuclear.organiZation.and.biogenesis Nuclear.organiZation.and.biogenesis DNA.binding Nuclear.organiZation.and.biogenesis Nuclear.organiZation.and.biogenesis 5 119  
120 Nuclear.organiZation.and.biogenesis DNA.binding Nuclear.organiZation.and.biogenesis DNA.binding Nuclear.organiZation.and.biogenesis 3 120  
121 Nuclear.organiZation.and.biogenesis Nuclear.organiZation.and.biogenesis Nuclear.organiZation.and.biogenesis Ribosomal.protein Ribosomal.protein 5 121  
122 Phosphoryl.transfer Phosphoryl.transfer Cell.adhesion Cell.adhesion 4 122  
123 Protein.kinase Protein.kinase Protein.kinase Protein.kinase 12 123  
124 Cell.adhesion Cell.adhesion Cell.adhesion Cell.adhesion 3 124  
125 DNA.binding DNA.binding Nuclear.organiZation.and.biogenesis Nuclear.organiZation.and.biogenesis DNA.binding DNA.binding 3 125  
126 Nuclear.organiZation.and.biogenesis DNA.binding DNA.binding Nuclear.organiZation.and.biogenesis 8 126  
127 DNA.binding DNA.binding DNA.binding Nuclear.organiZation.and.biogenesis 3 127  
128 Signal.transduction Signal.transduction Signal.transduction DNA.binding DNA.binding 5 128  
129 Phosphoryl.transfer Phosphoryl.transfer Cell.adhesion Cell.adhesion 3 129  
130 Cytoskeleton.structural.protein Cytoskeleton.structural.protein Cytoskeleton.structural.protein Cytoskeleton.structural.protein 17 1  
131 Nuclear.organiZation.and.biogenesis Nuclear.organiZation.and.biogenesis Nuclear.organiZation.and.biogenesis Carboxyl.transfer Nuclear.organiZation.and.biogenesis 3 132  
132 Nuclear.organiZation.and.biogenesis DNA.binding Nuclear.organiZation.and.biogenesis Nuclear.organiZation.and.biogenesis Nuclear.organiZation.and.biogenesis 3 132  
133 Nuclear.organiZation.and.biogenesis Nuclear.organiZation.and.biogenesis Phosphoryl.transfer Nuclear.organiZation.and.biogenesis Nuclear.organiZation.and.biogenesis 4 133  
134 Cell.adhesion Cell.adhesion Cell.adhesion Cell.adhesion 30 134  
135 Ligand.binding.or.carrier Ligand.binding.or.carrier Ligand.binding.or.carrier Ligand.binding.or.carrier 3 135  
136 Nuclear.organiZation.and.biogenesis Nuclear.organiZation.and.biogenesis Nuclear.organiZation.and.biogenesis DNA.replication DNA.replication 3 136  
137 Ion.homeostasis Ion.homeostasis Ion.homeostasis Ion.homeostasis 4 137  
138 Signal.transduction Signal.transduction Signal.transduction Signal.transduction 8 138  
139 Nuclear.organiZation.and.biogenesis Nuclear.organiZation.and.biogenesis Nuclear.organiZation.and.biogenesis DNA.binding DNA.binding 10 139  
140 Lipid.metabolism Lipid.metabolism Lipid.metabolism Lipid.metabolism 6 140  
141 Cell.communication Cell.communication Cell.communication Nuclear.organiZation.and.biogenesis Nuclear.organiZation.and.biogenesis 4 141  
142 DNA.binding Nuclear.organiZation.and.biogenesis DNA.binding Nuclear.organiZation.and.biogenesis DNA.binding DNA.binding 6 142  
143 Nuclear.organiZation.and.biogenesis DNA.binding DNA.binding Nuclear.organiZation.and.biogenesis DNA.binding 4 143
