# Supplementary material
Source: PubMed Central journal article supplement (PMC55322)
Supplement: gb-2001-2-7-research0025-S103.pdf [file gb-2001-2-7-research0025-S103.pdf]

# Nuclear organization and biogenesis

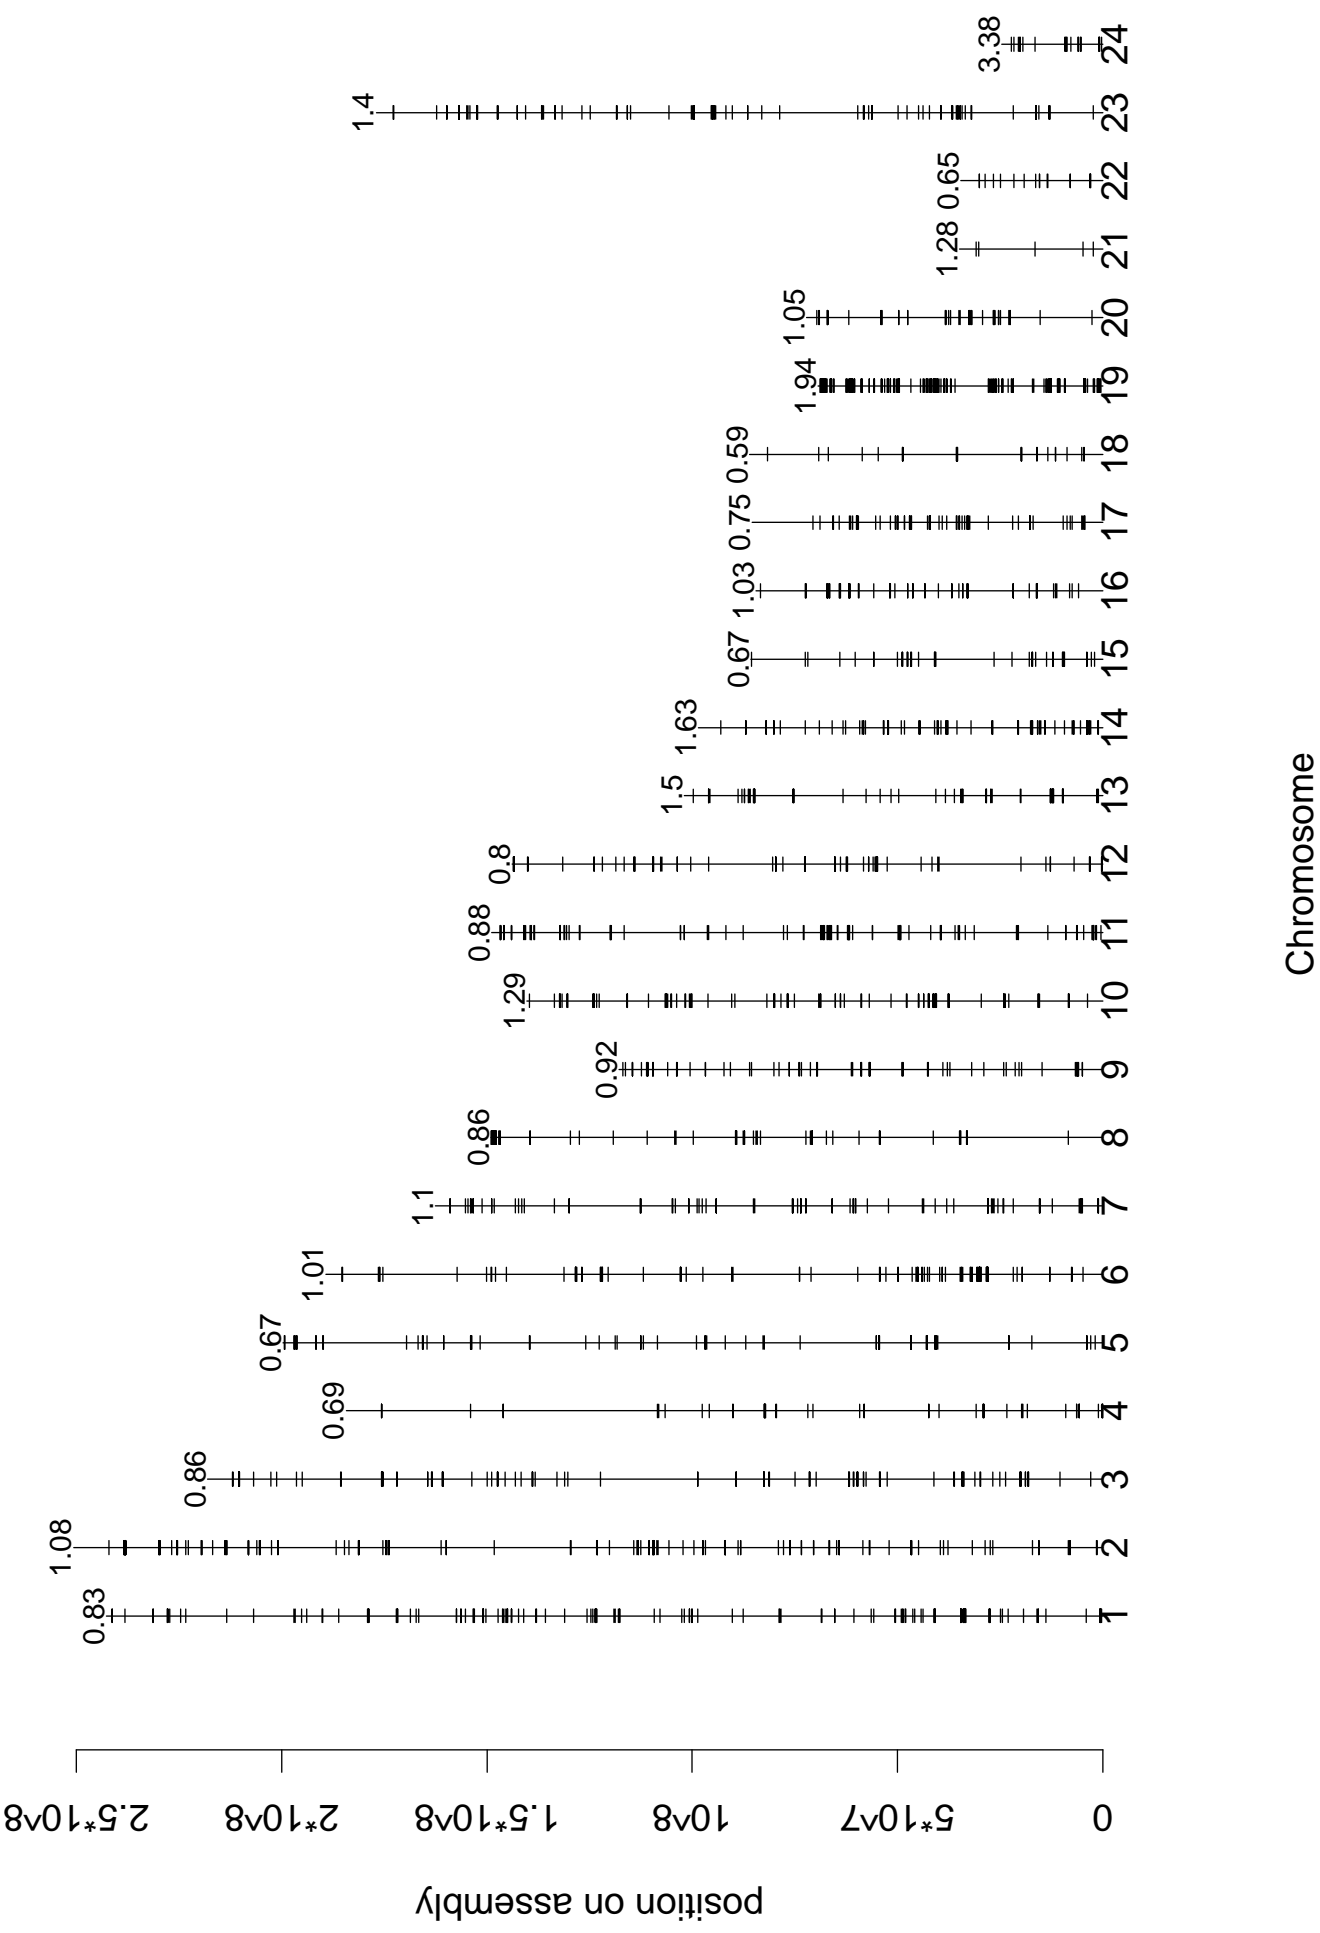

# Enzyme

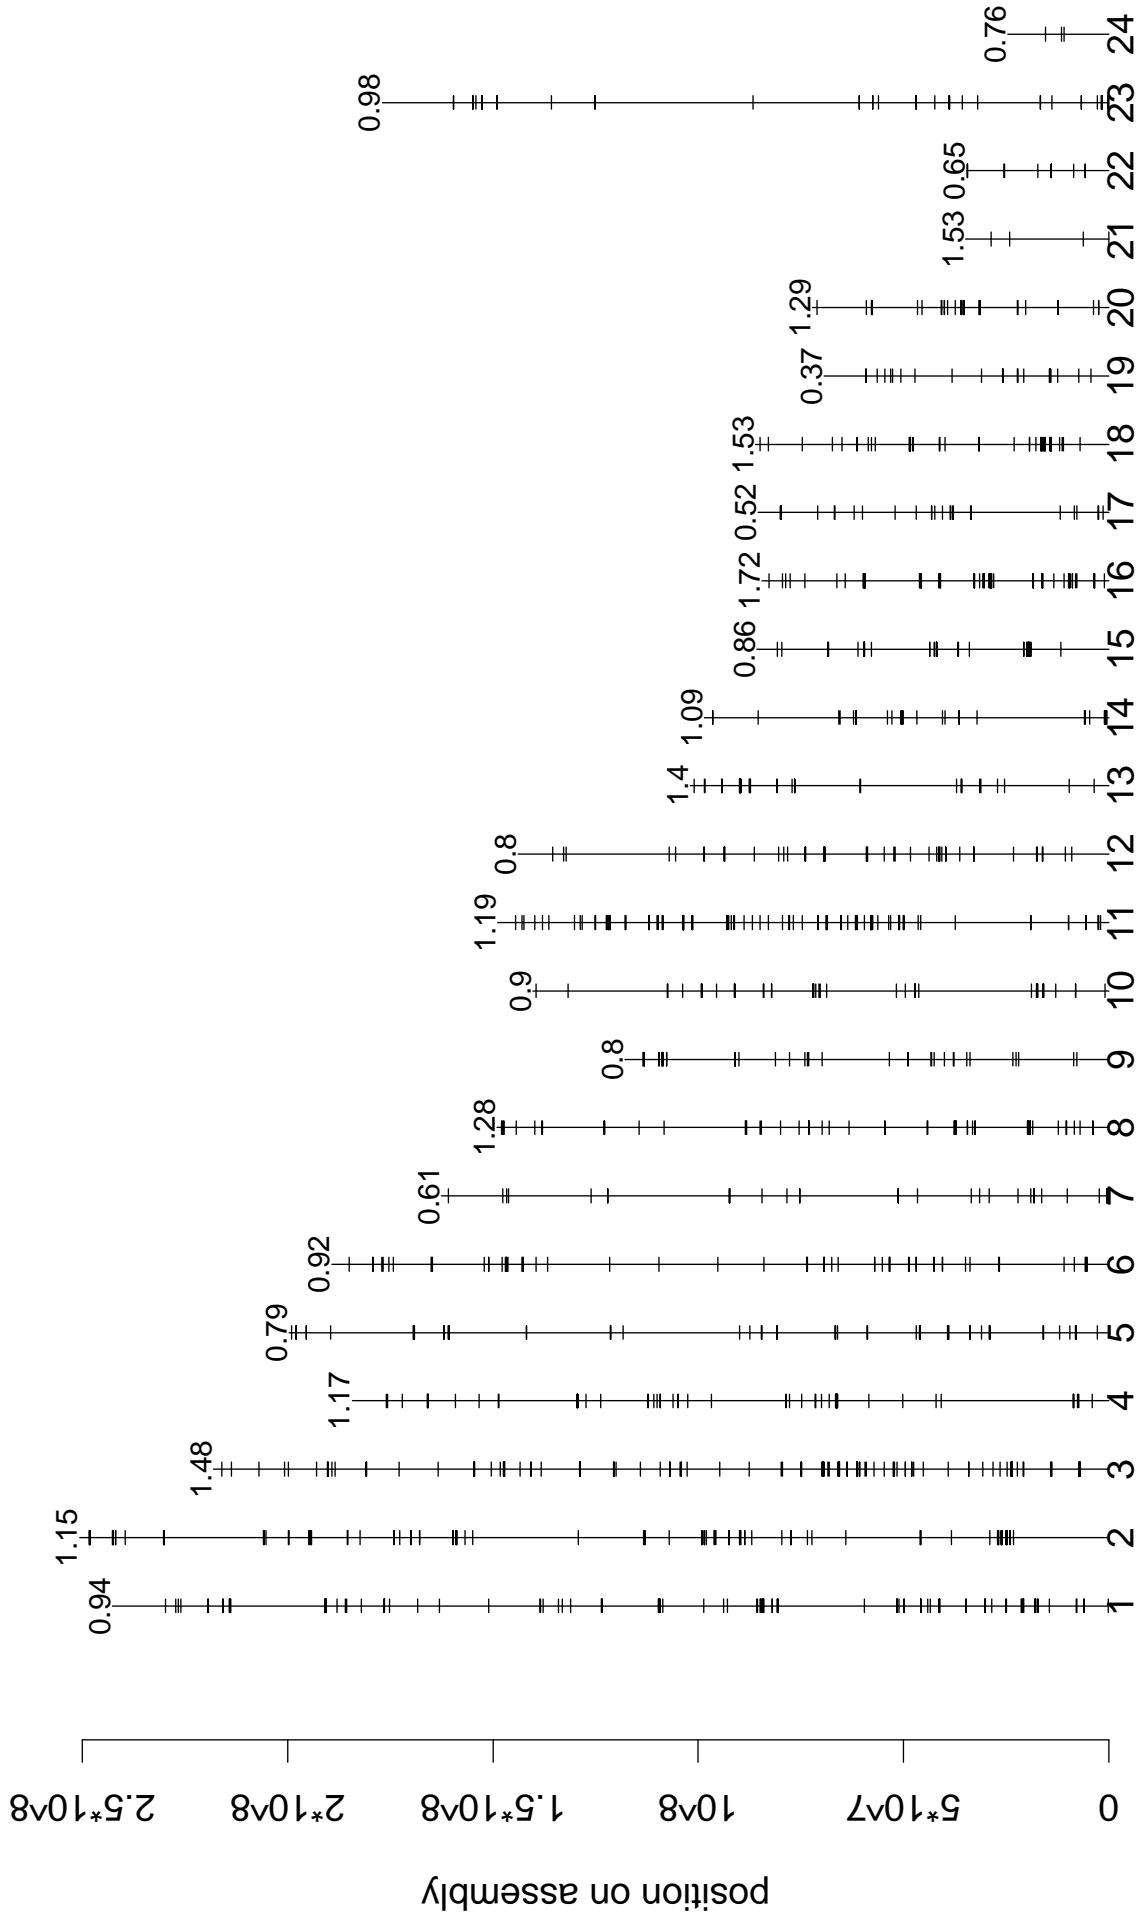

# Signal transduction

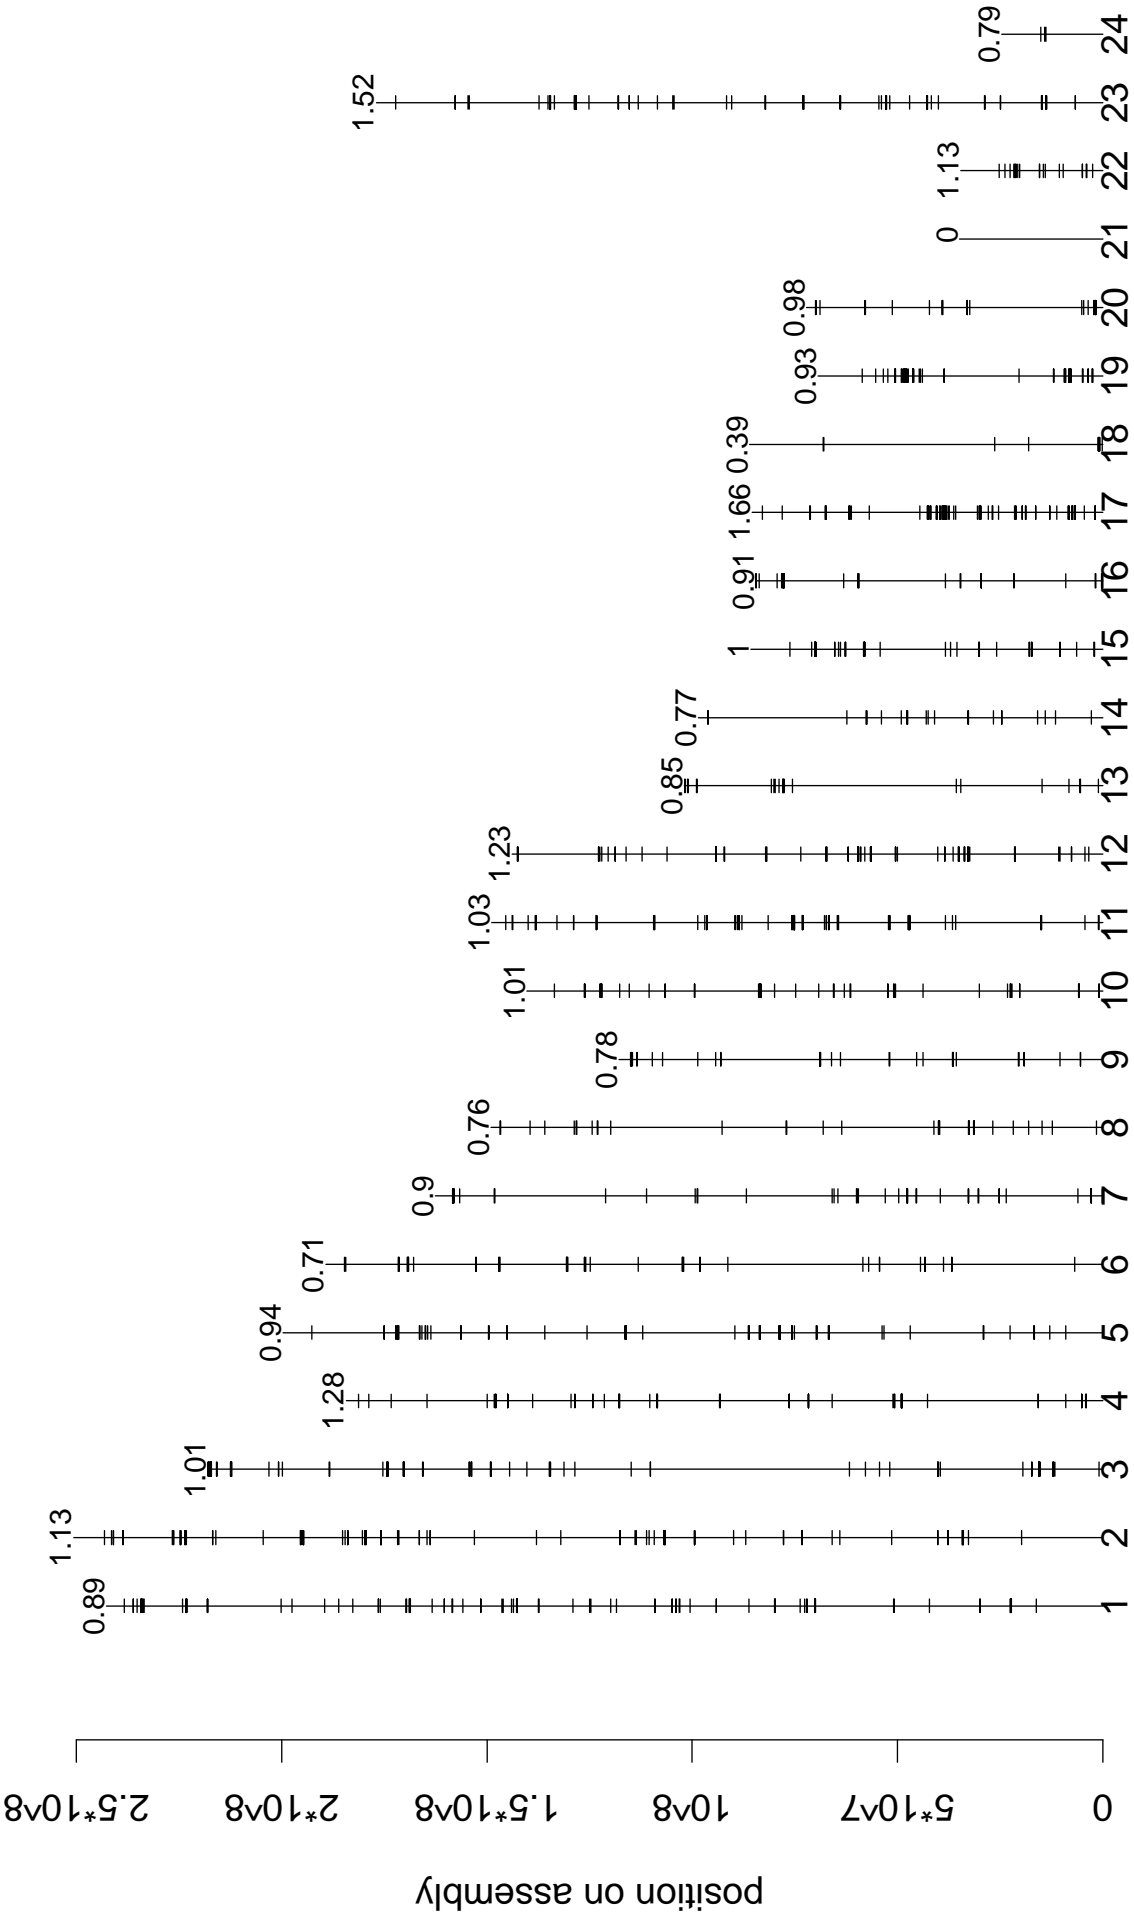

# Transcription

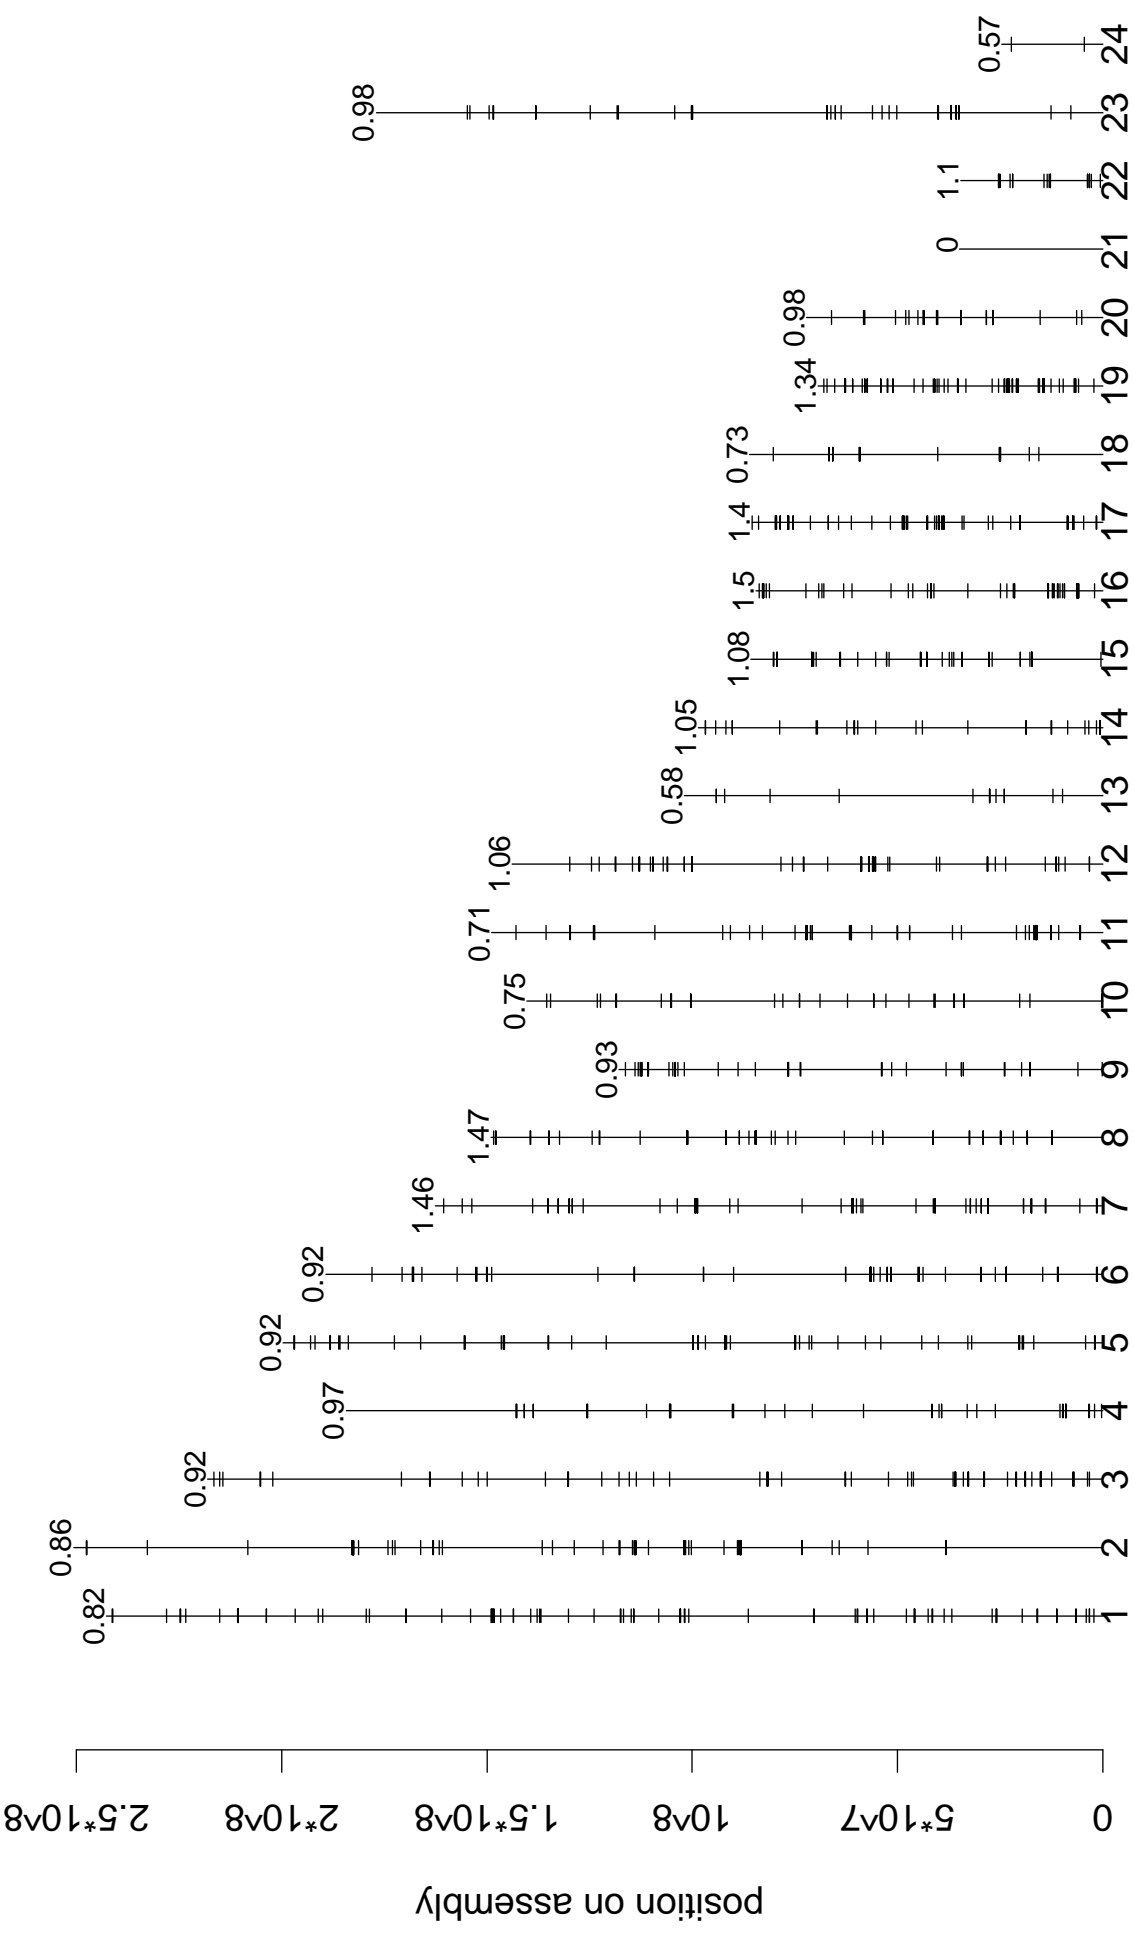

# Receptor

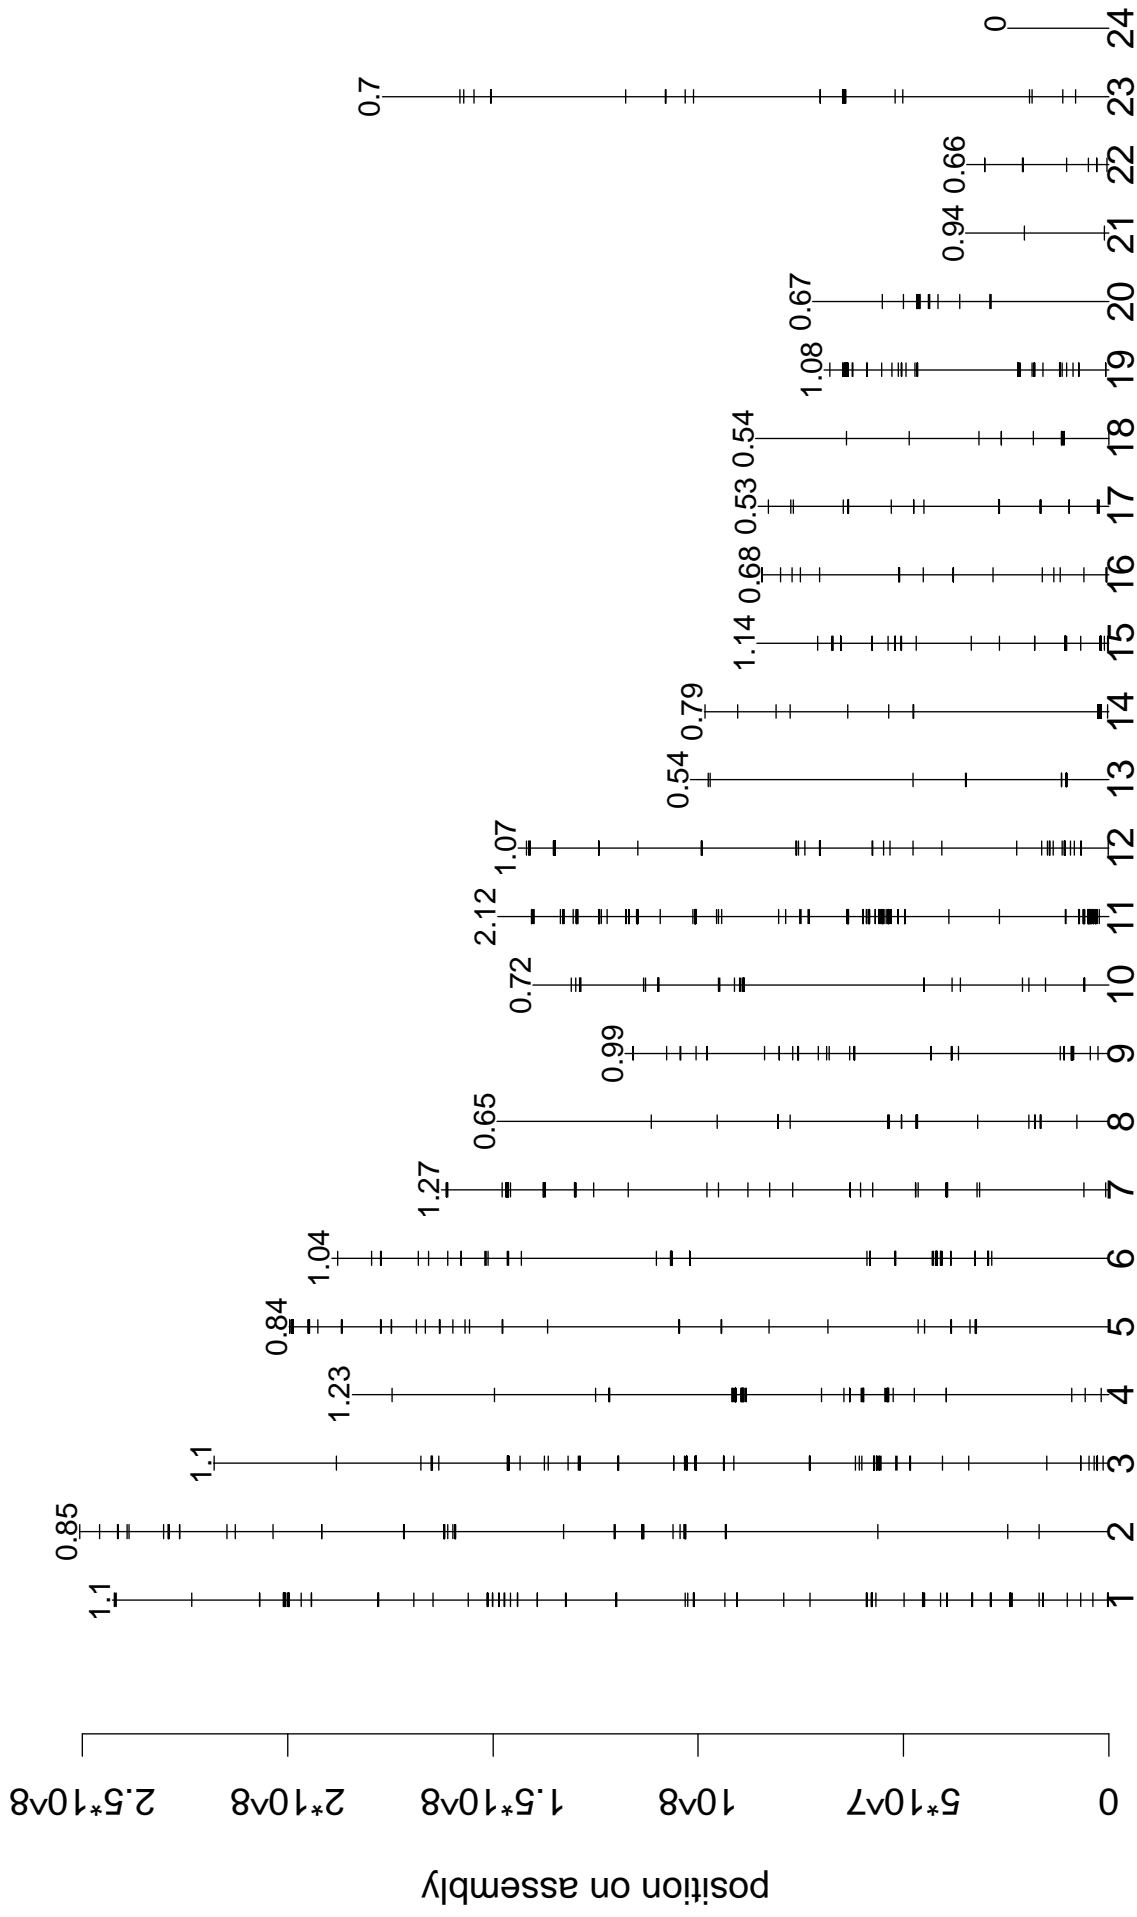

# Ribosomal protein

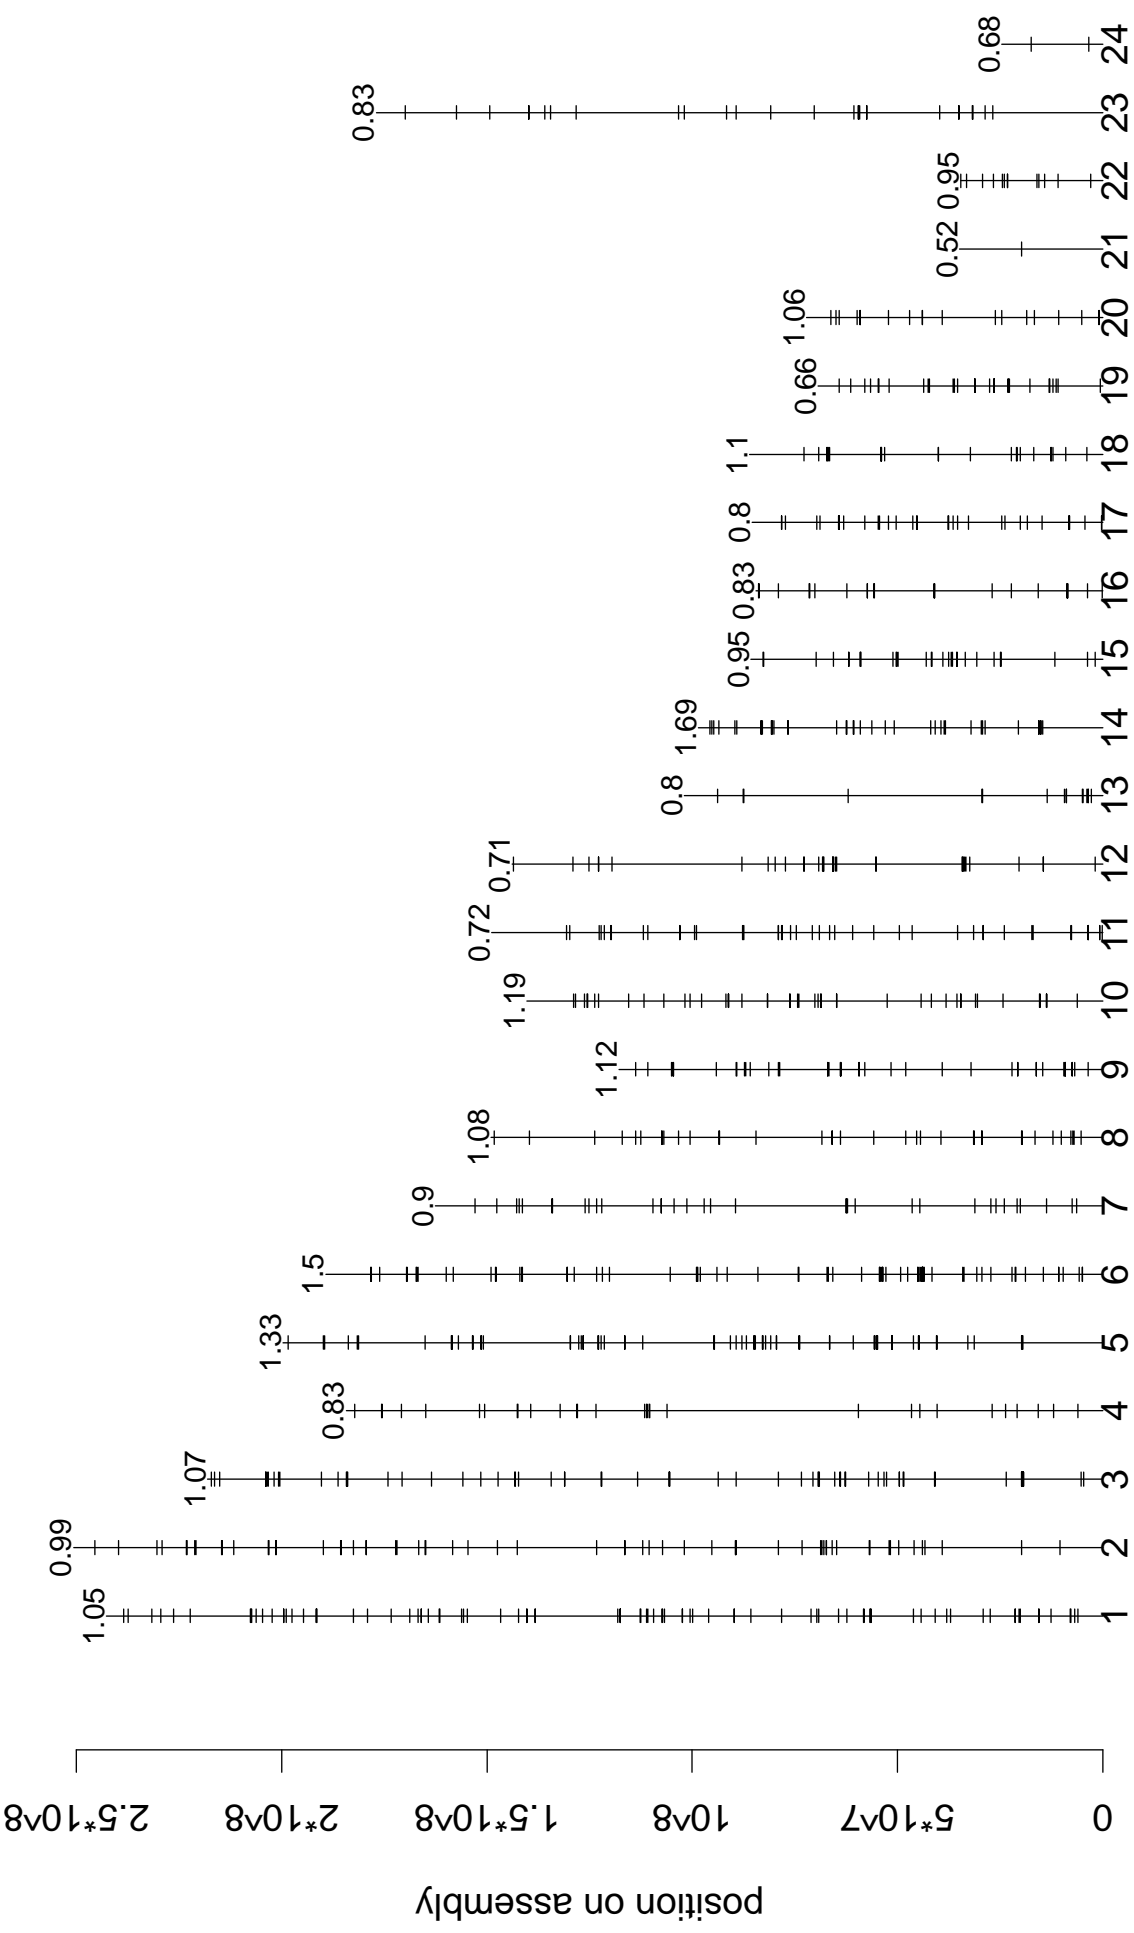

# DNA binding

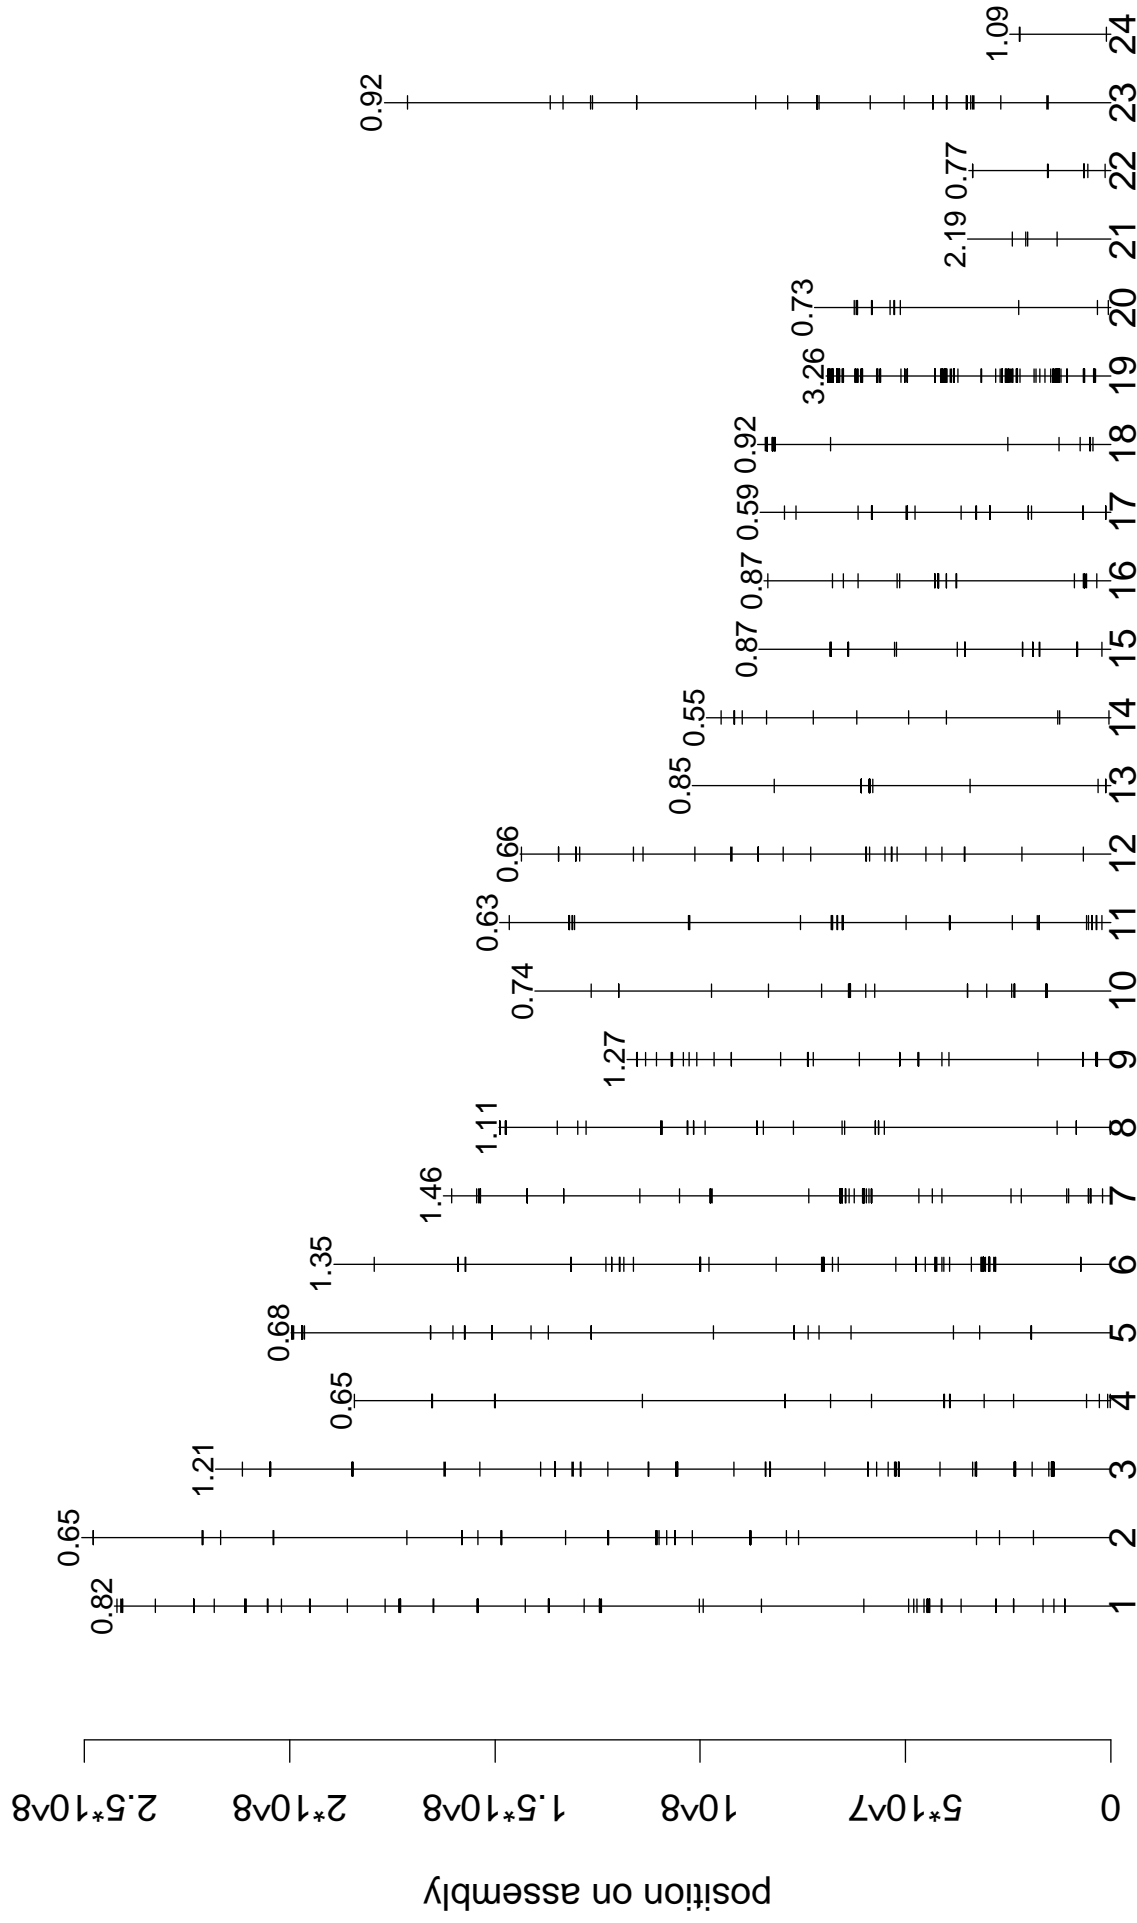

Chromosome

# Phosphoryl transfer

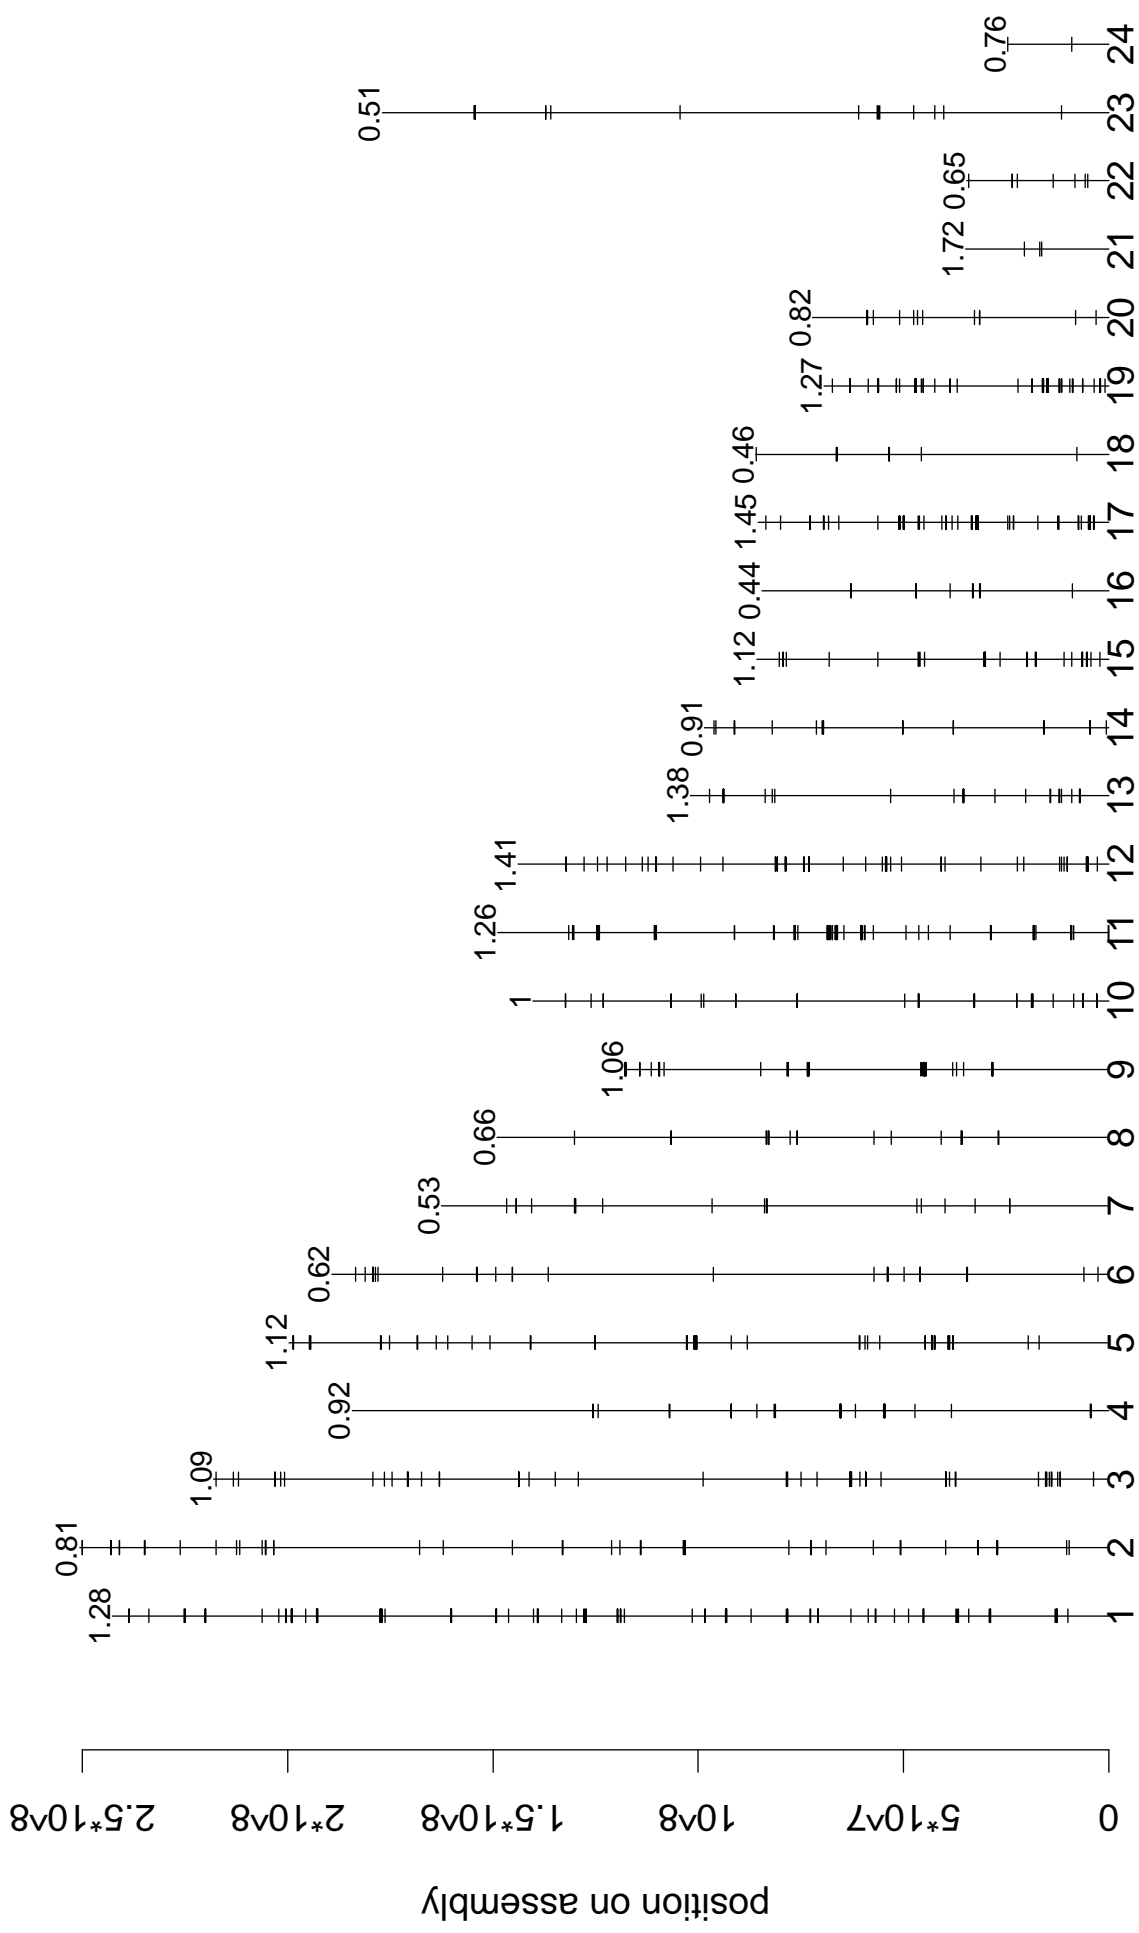



# Protein kinase

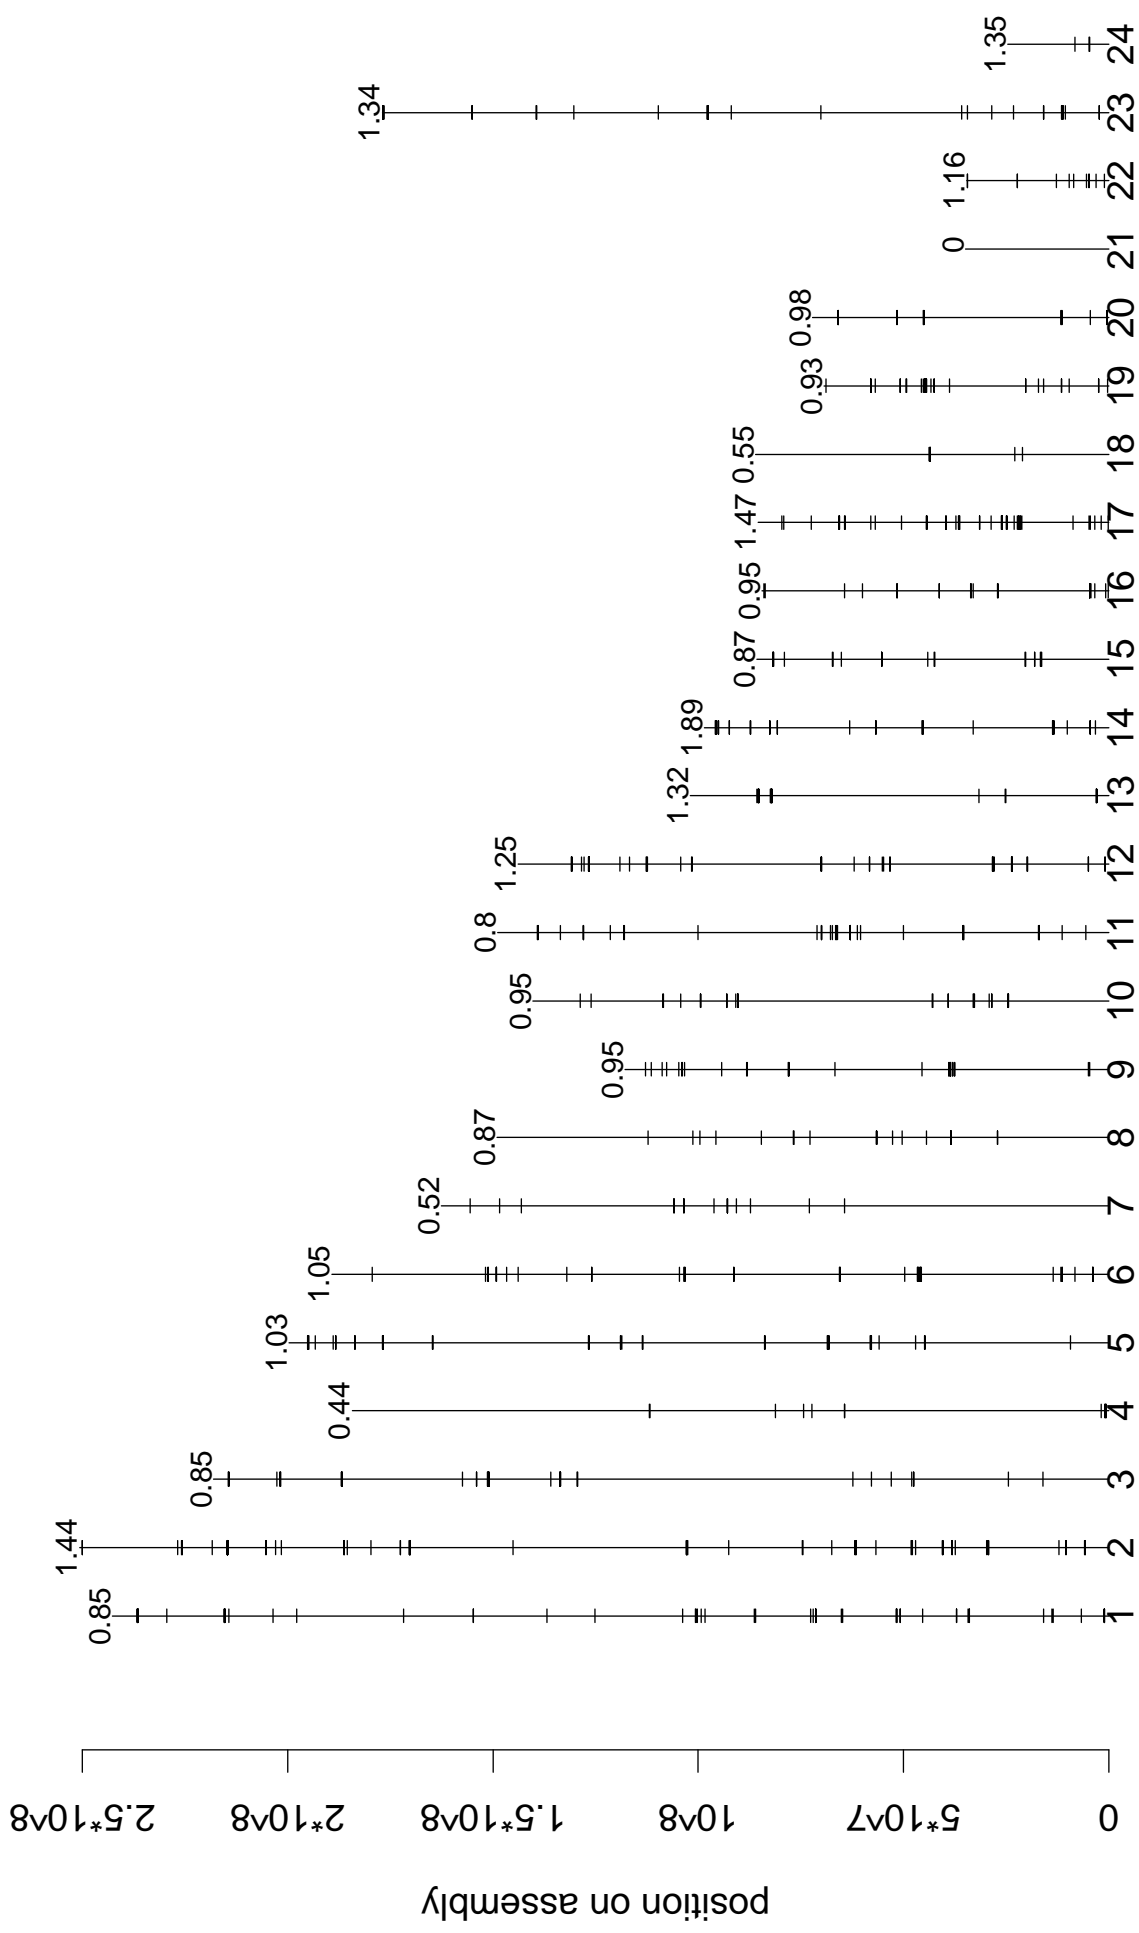

Chromosome

# Ligand binding or carrier

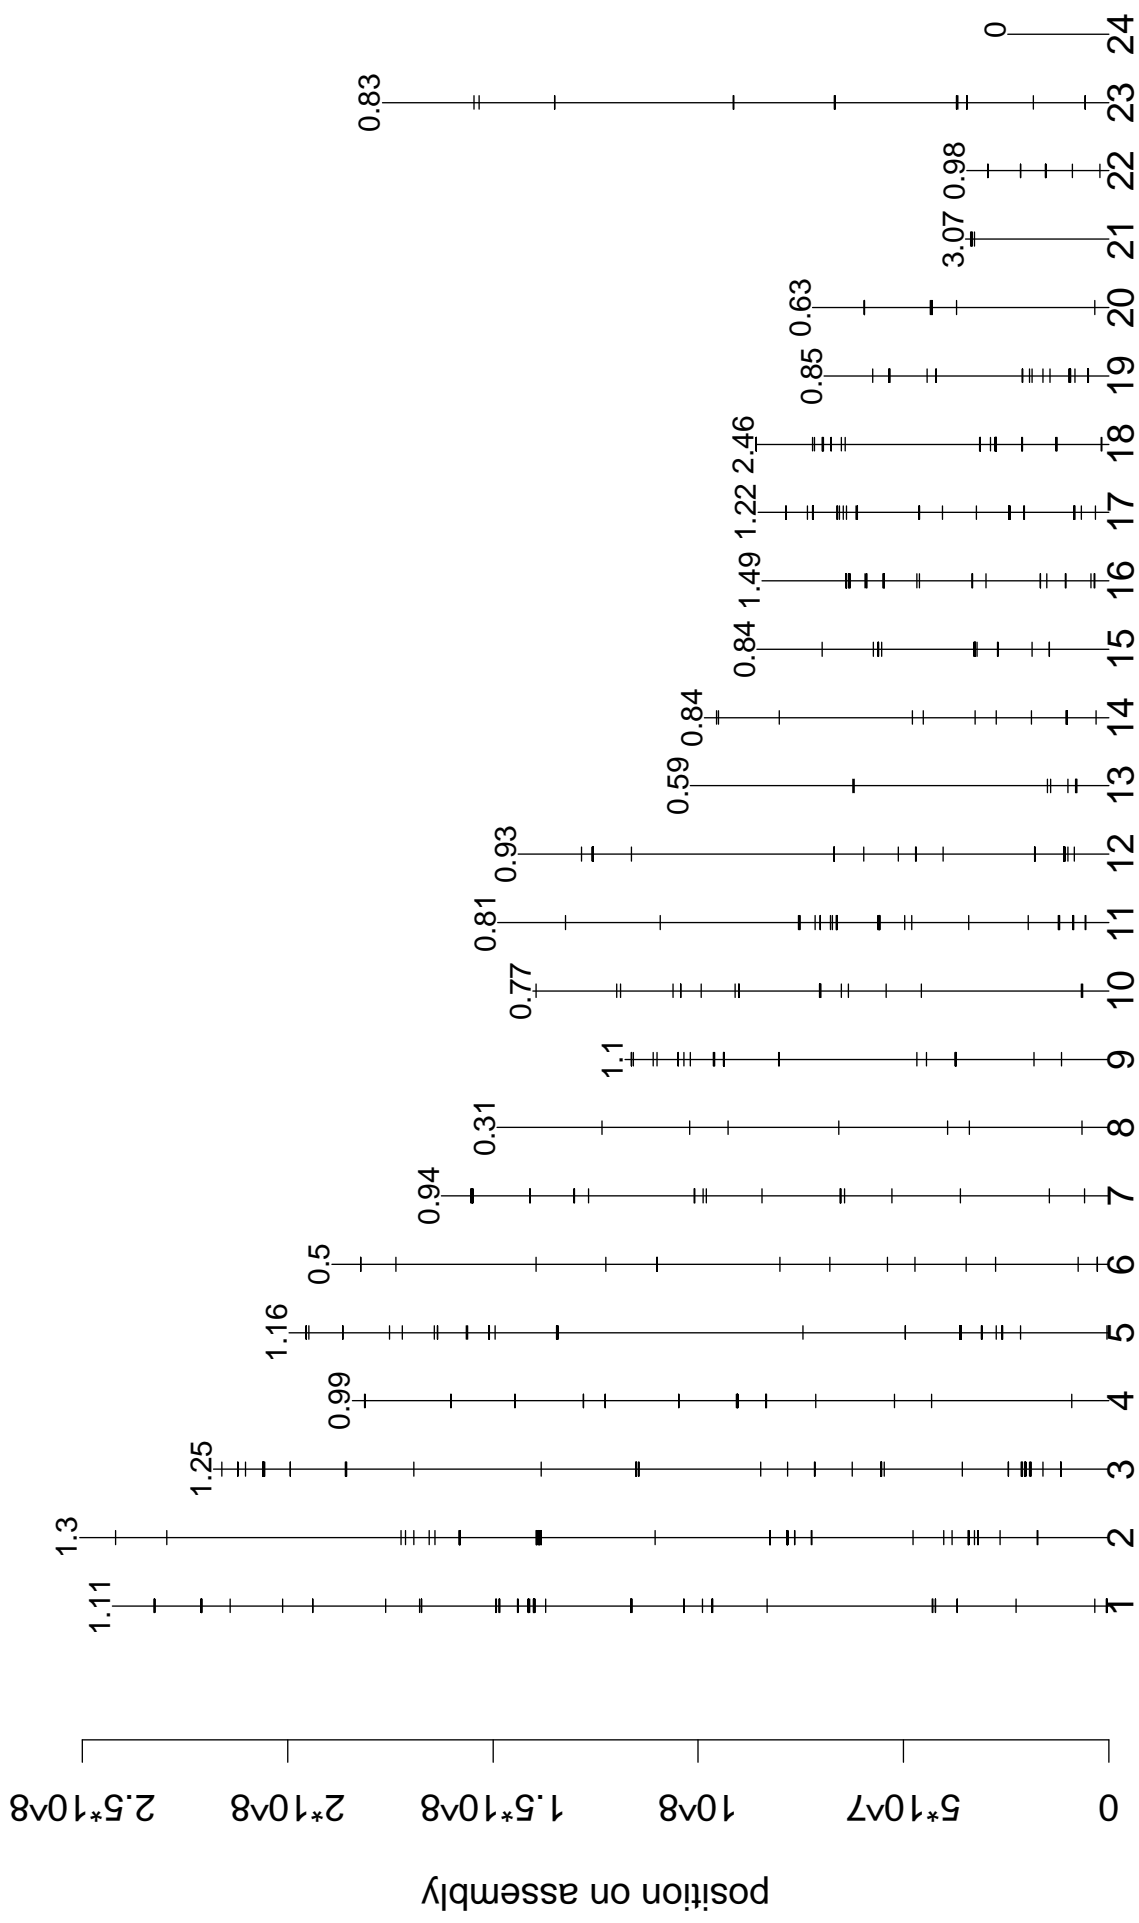

Chromosome

# Electron transport

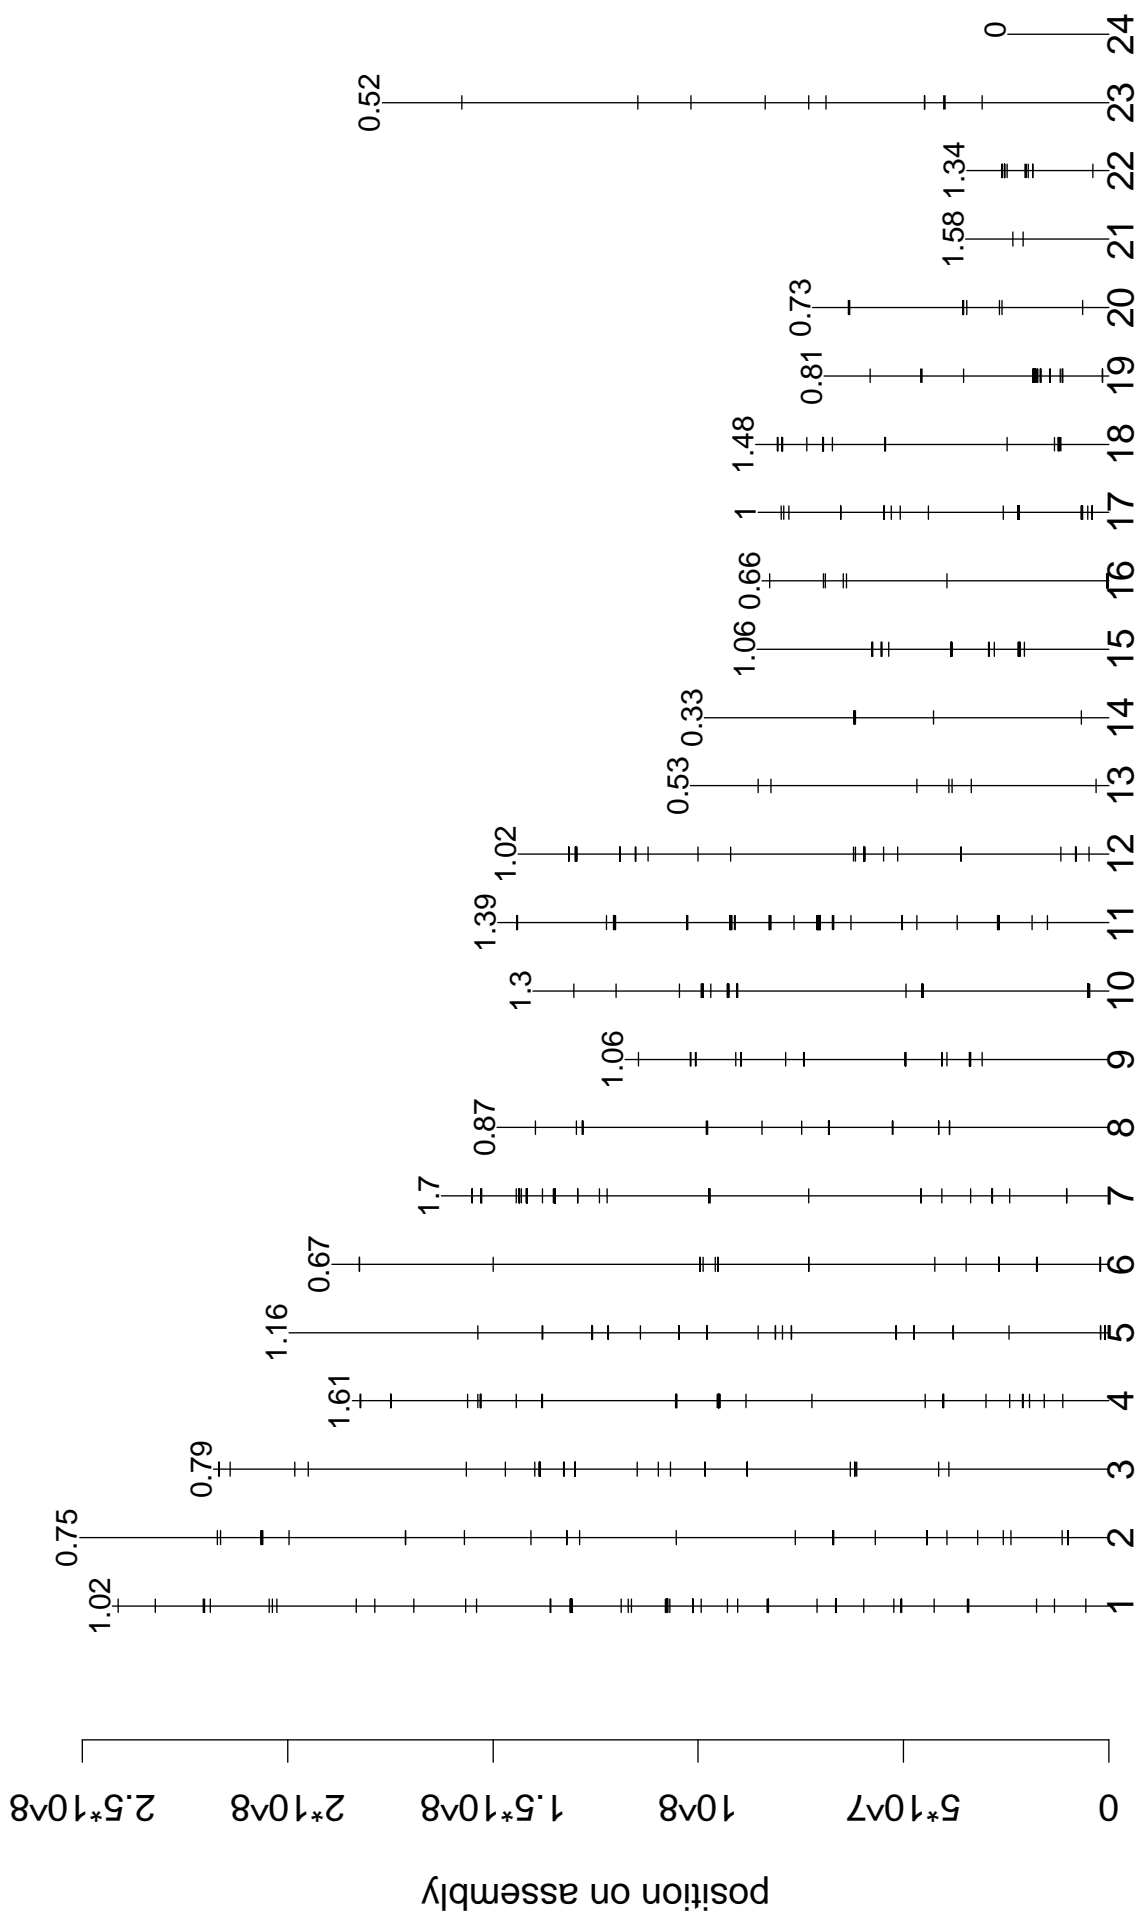

# Transport

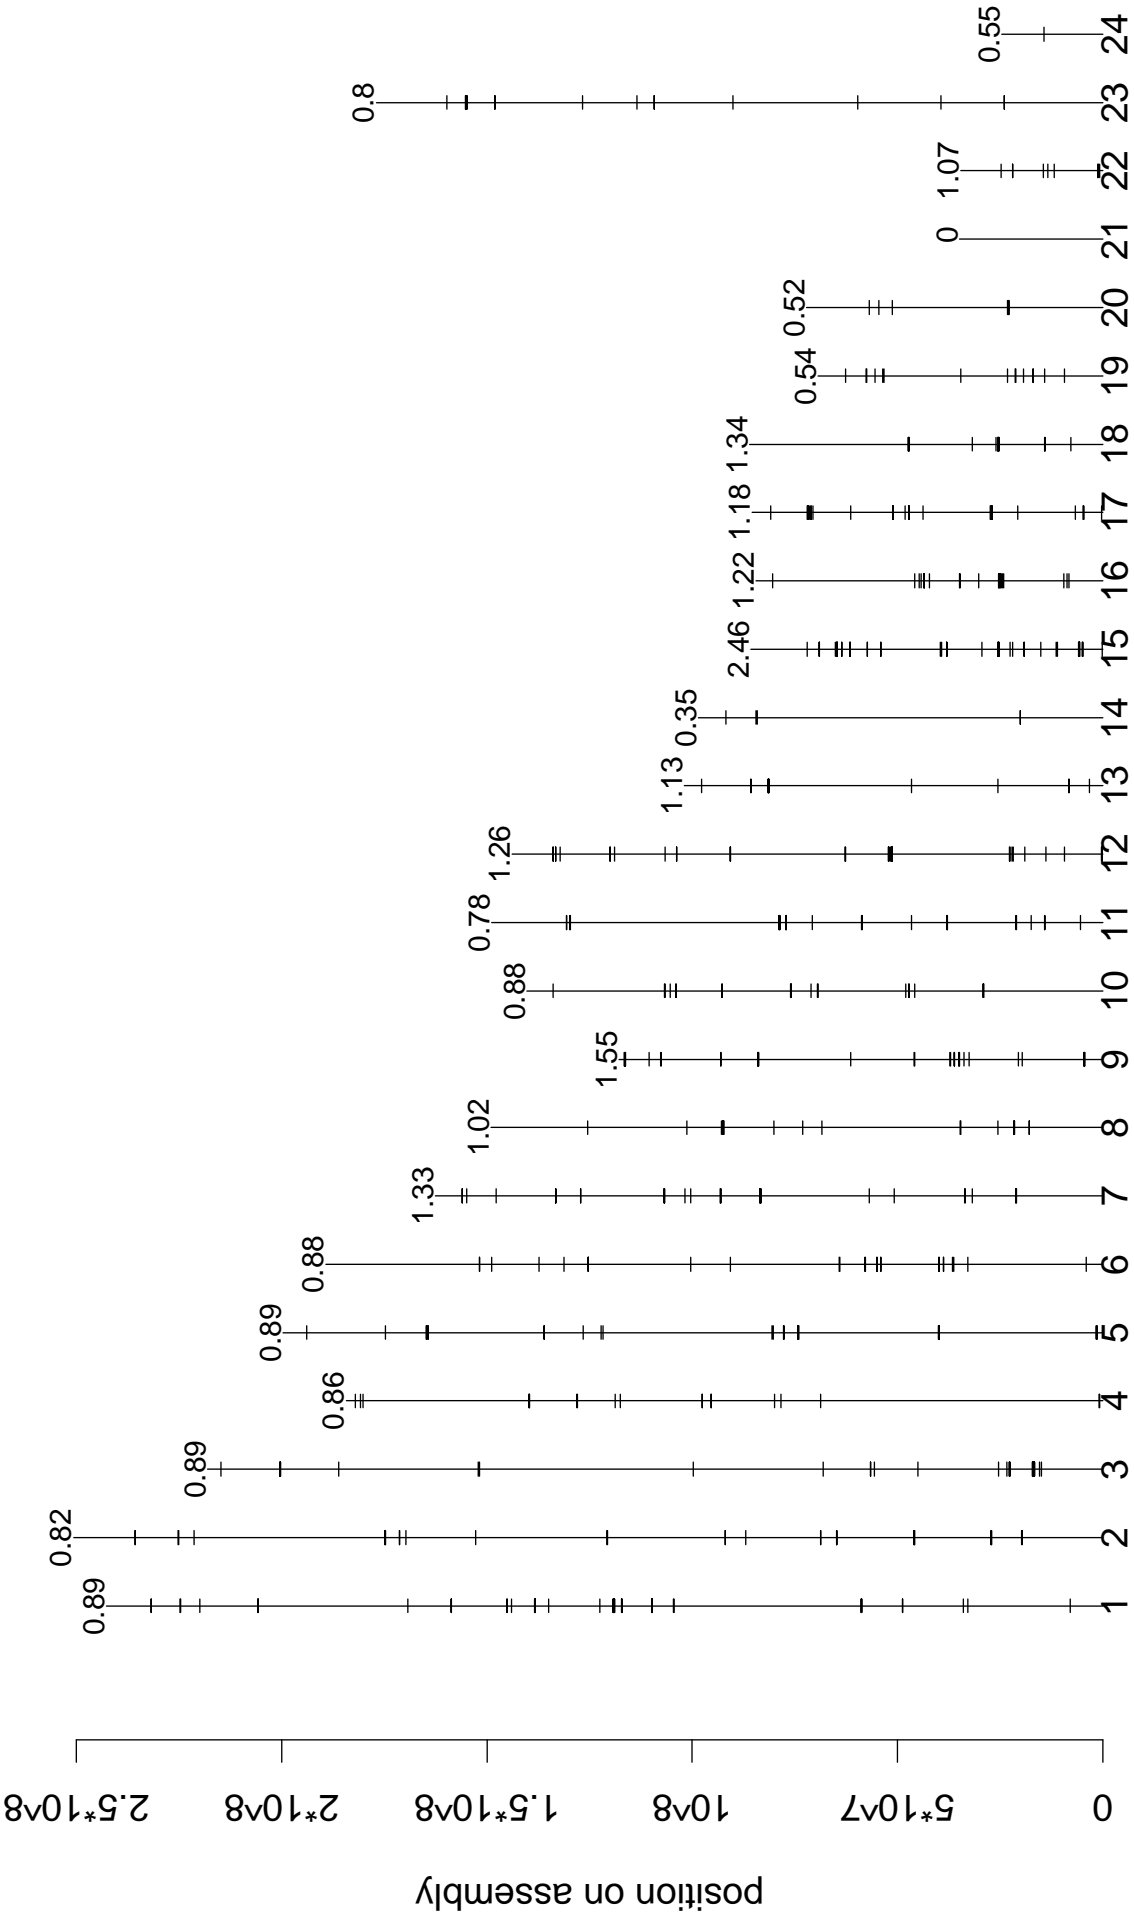

Chromosome

# Protease

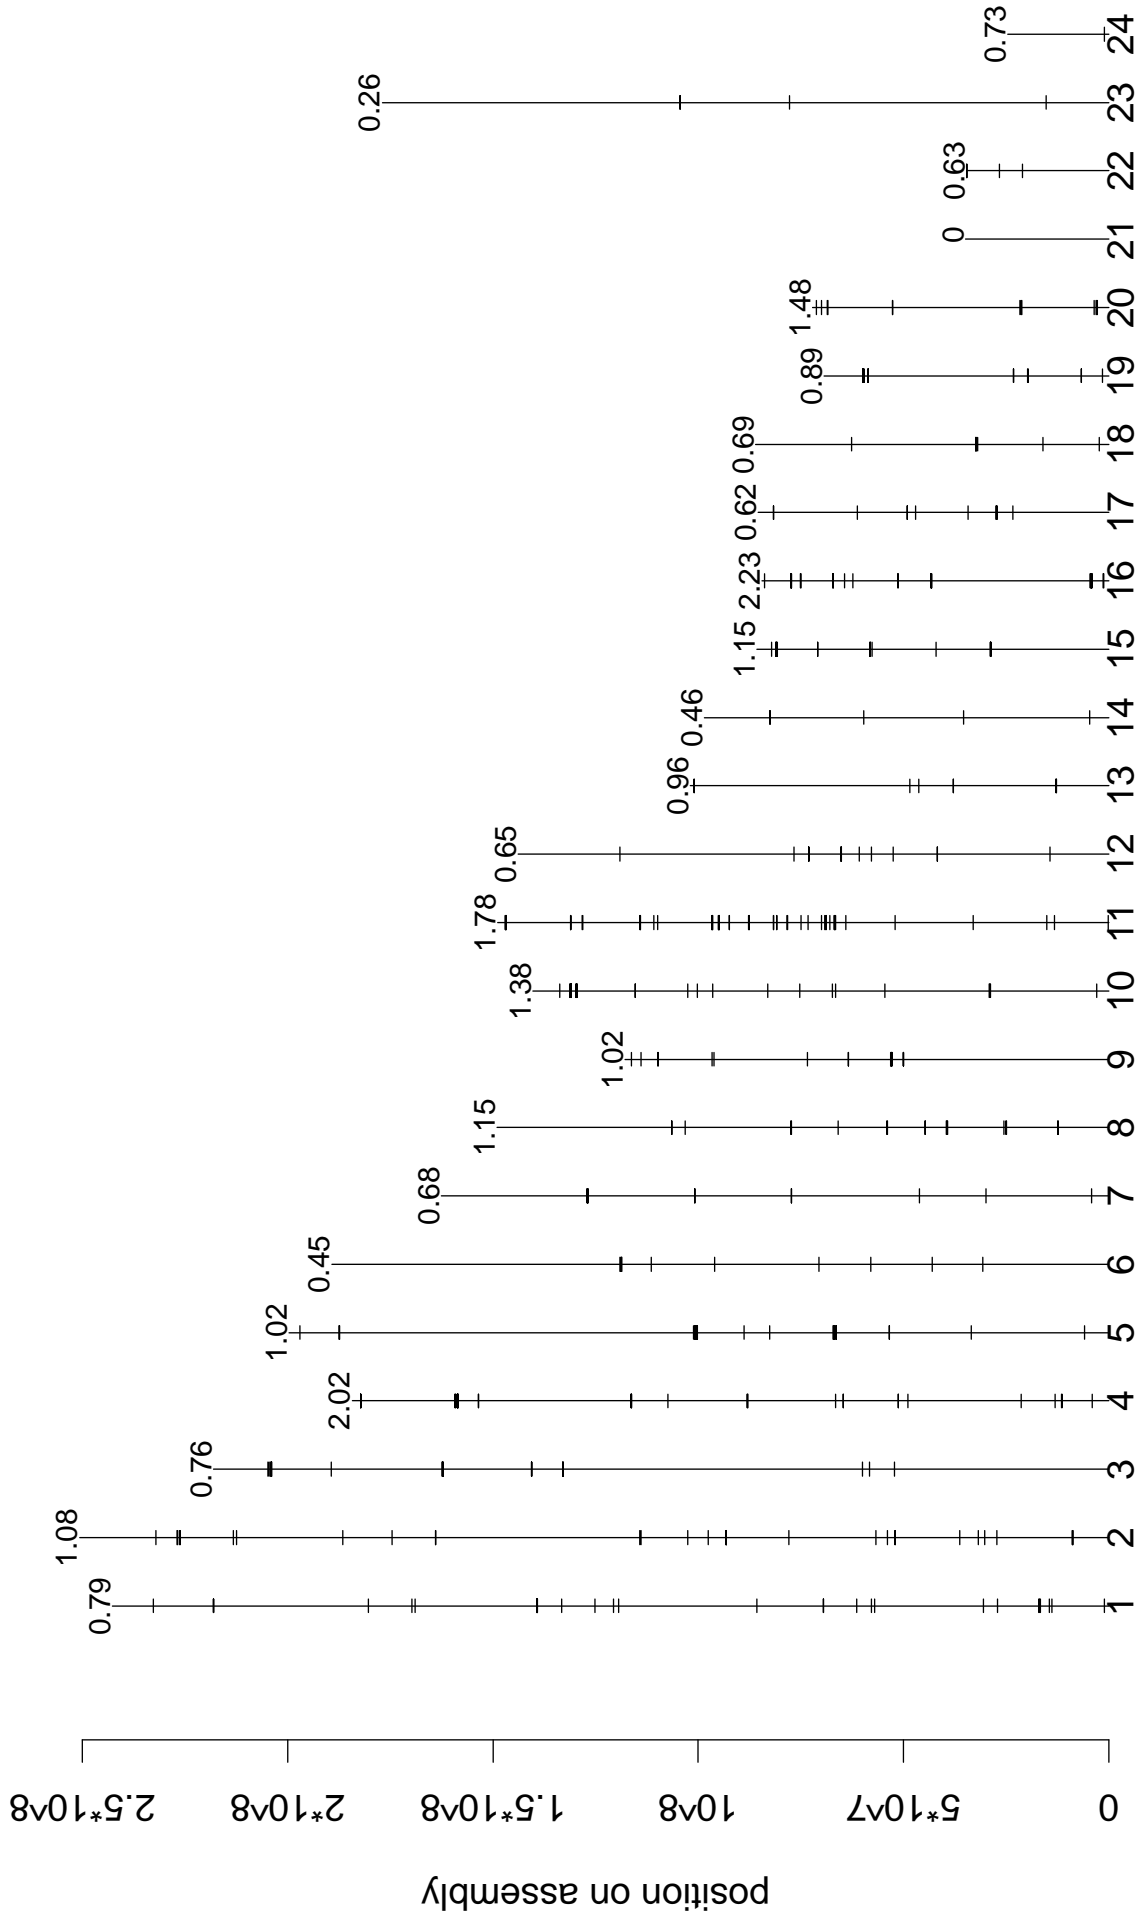

Chromosome

# Cell adhesion

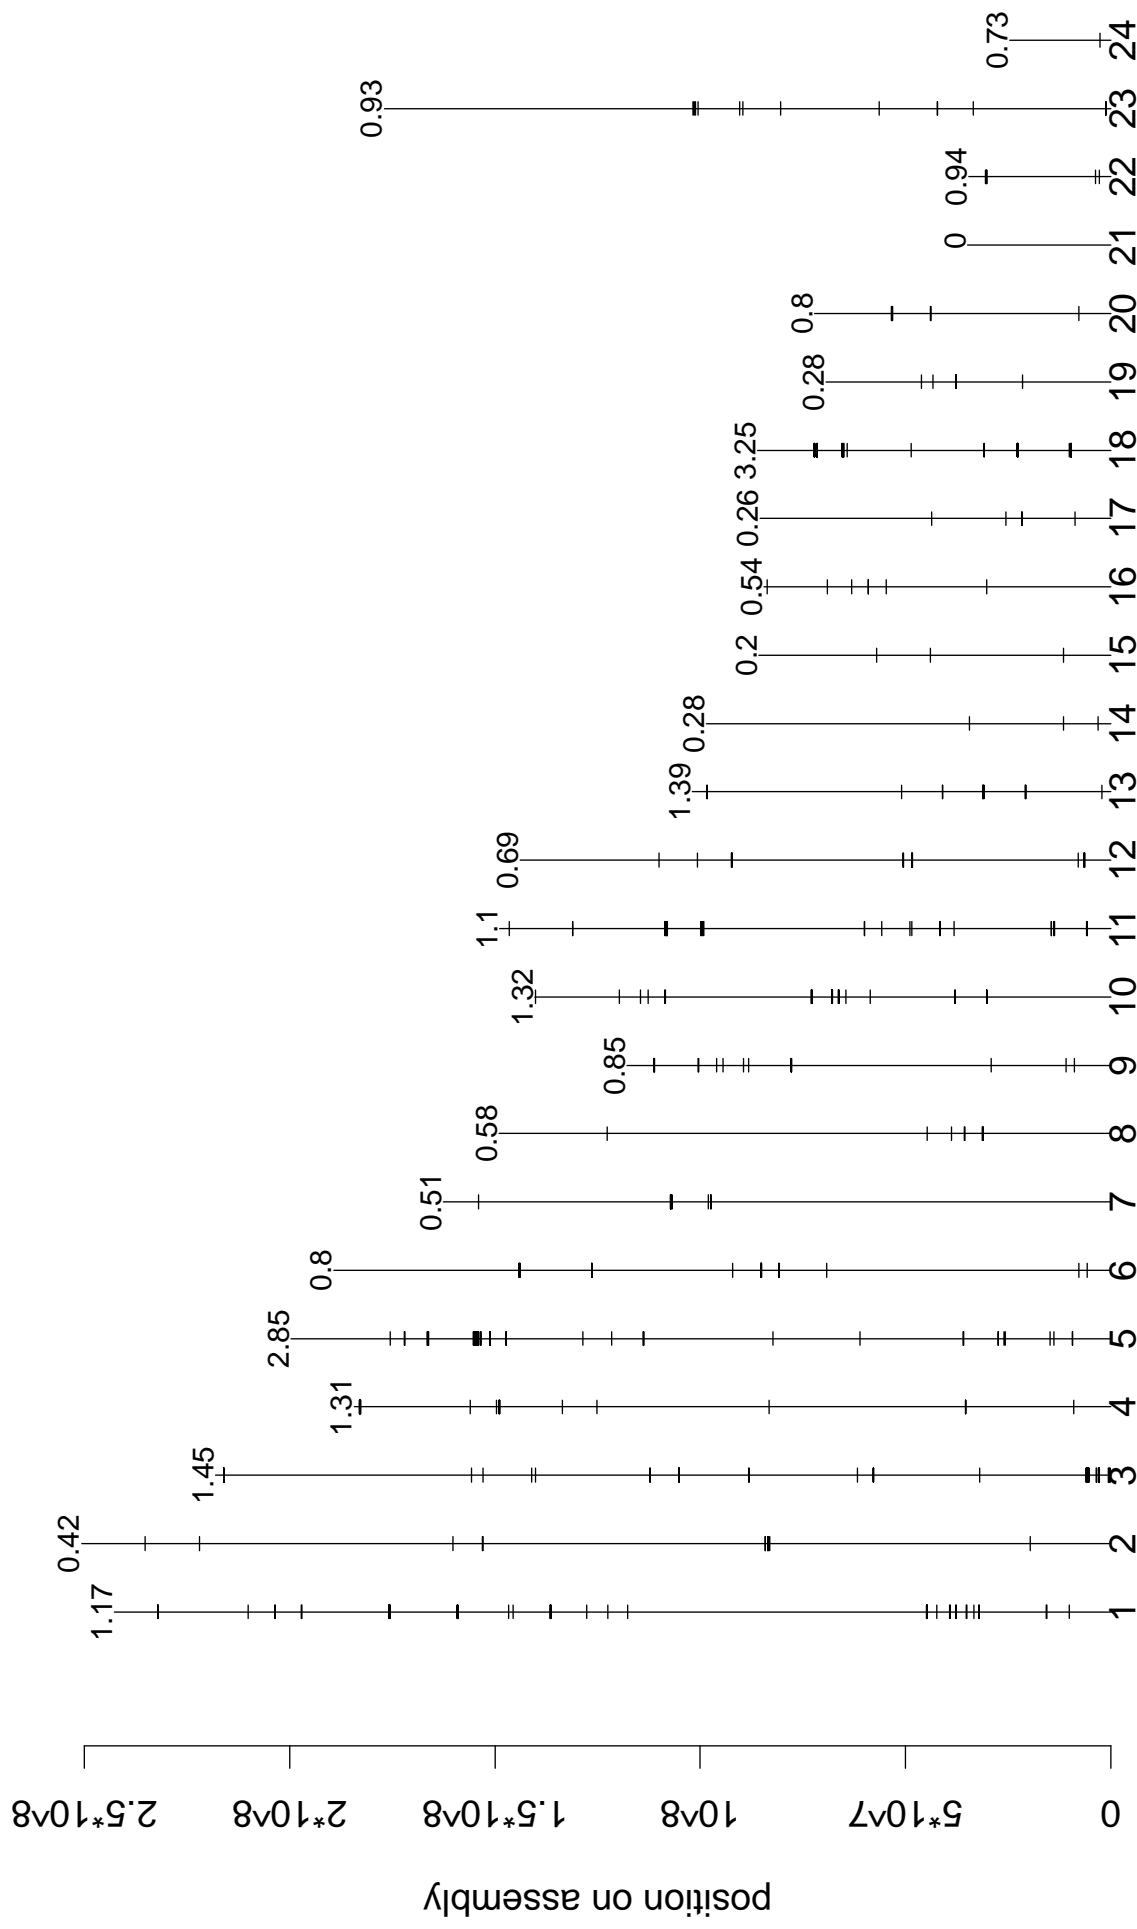

Chromosome

# Lipid metabolism

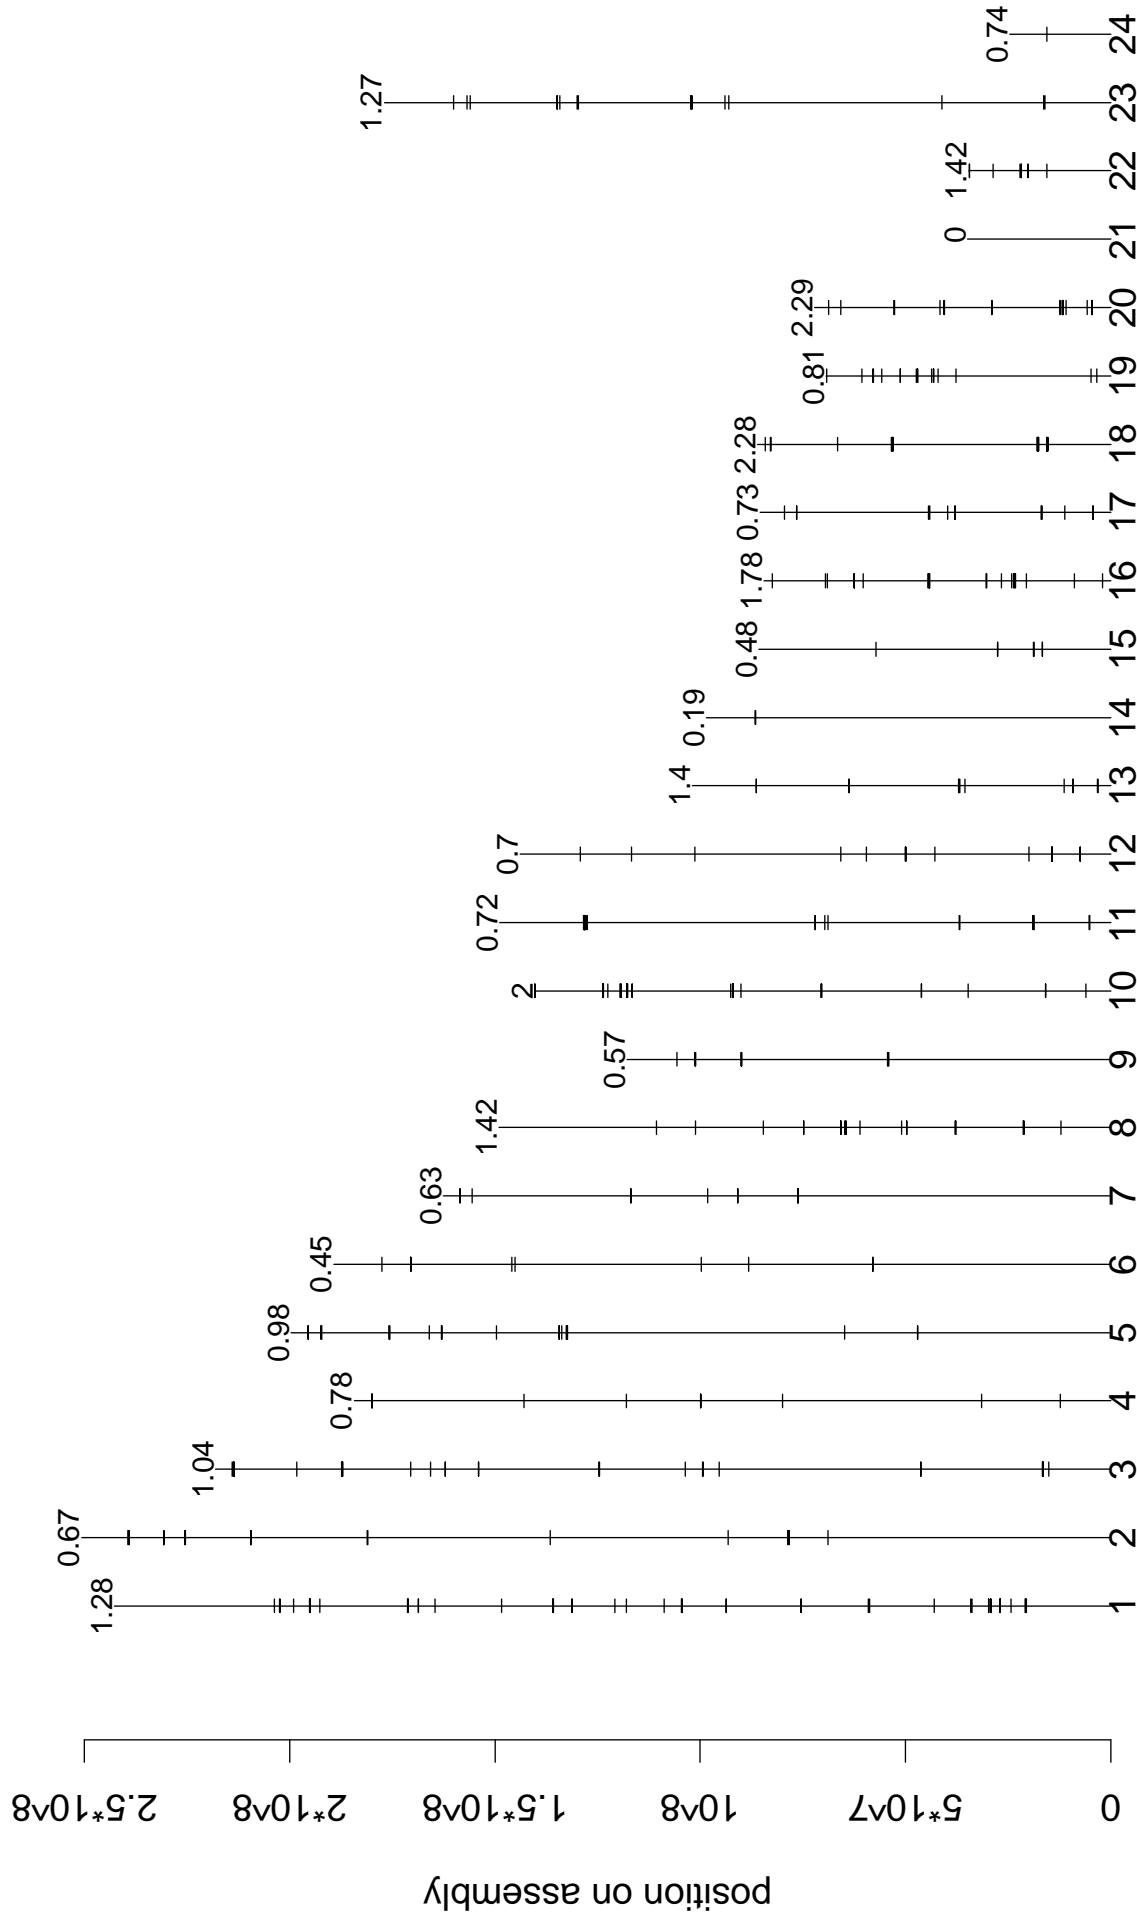

Chromosome

# DNA replication

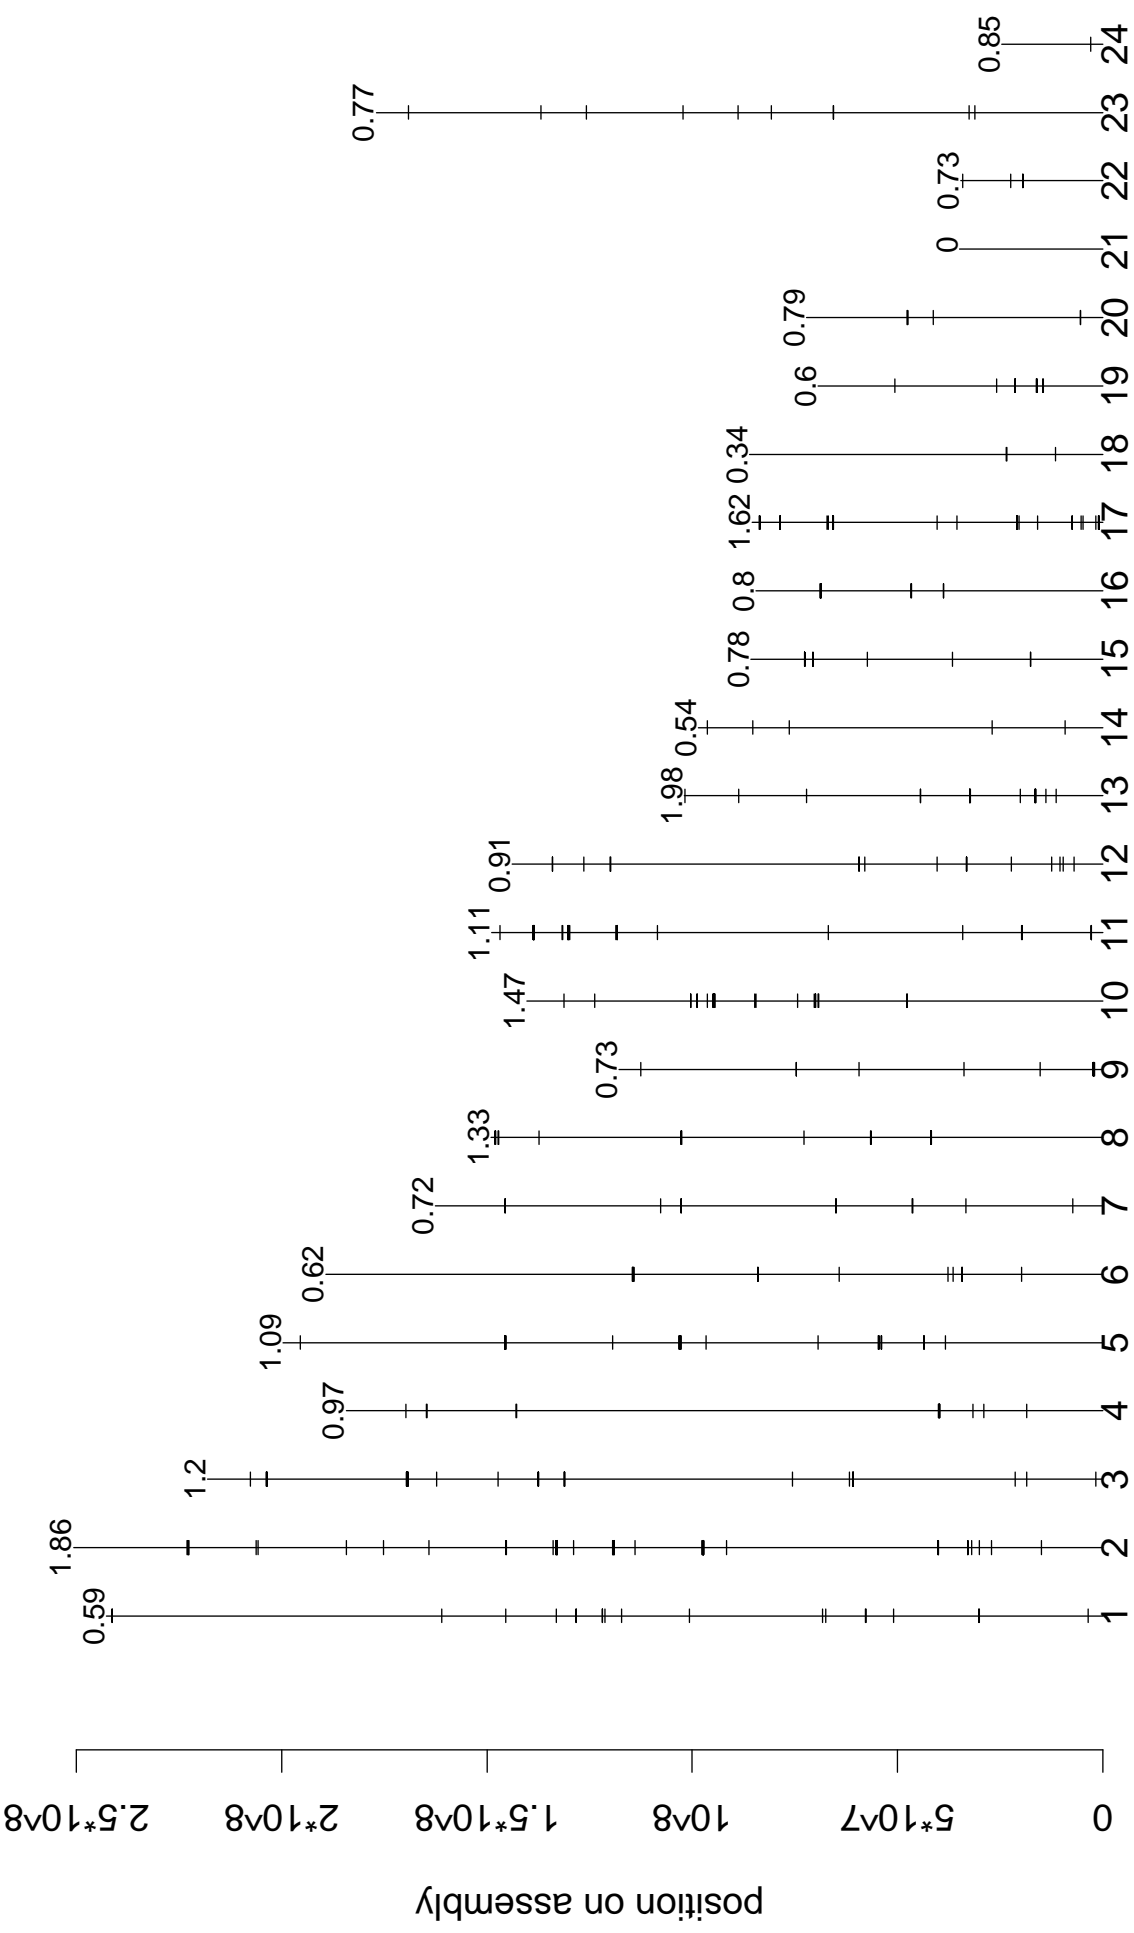

Chromosome



# Cytoskeleton structural protein

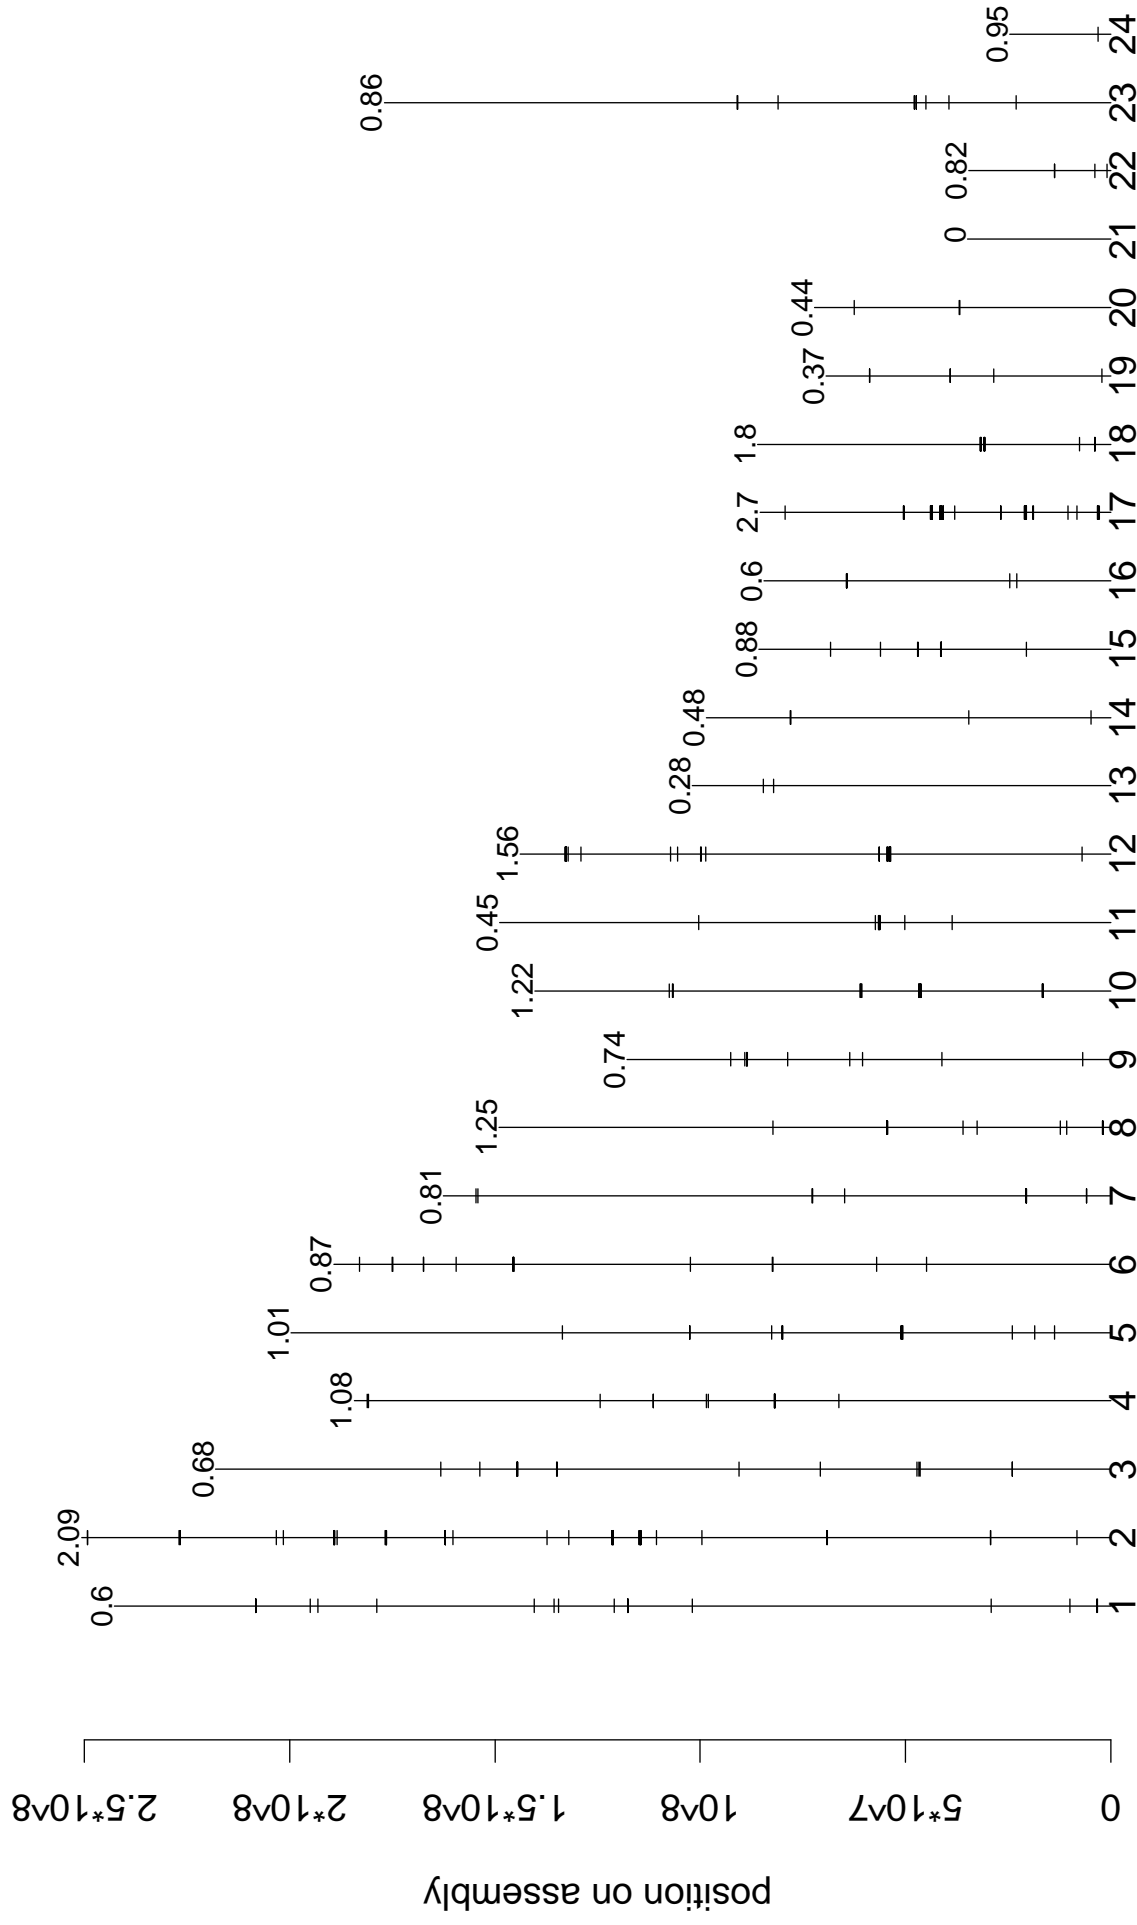

# Defense/immunity protein

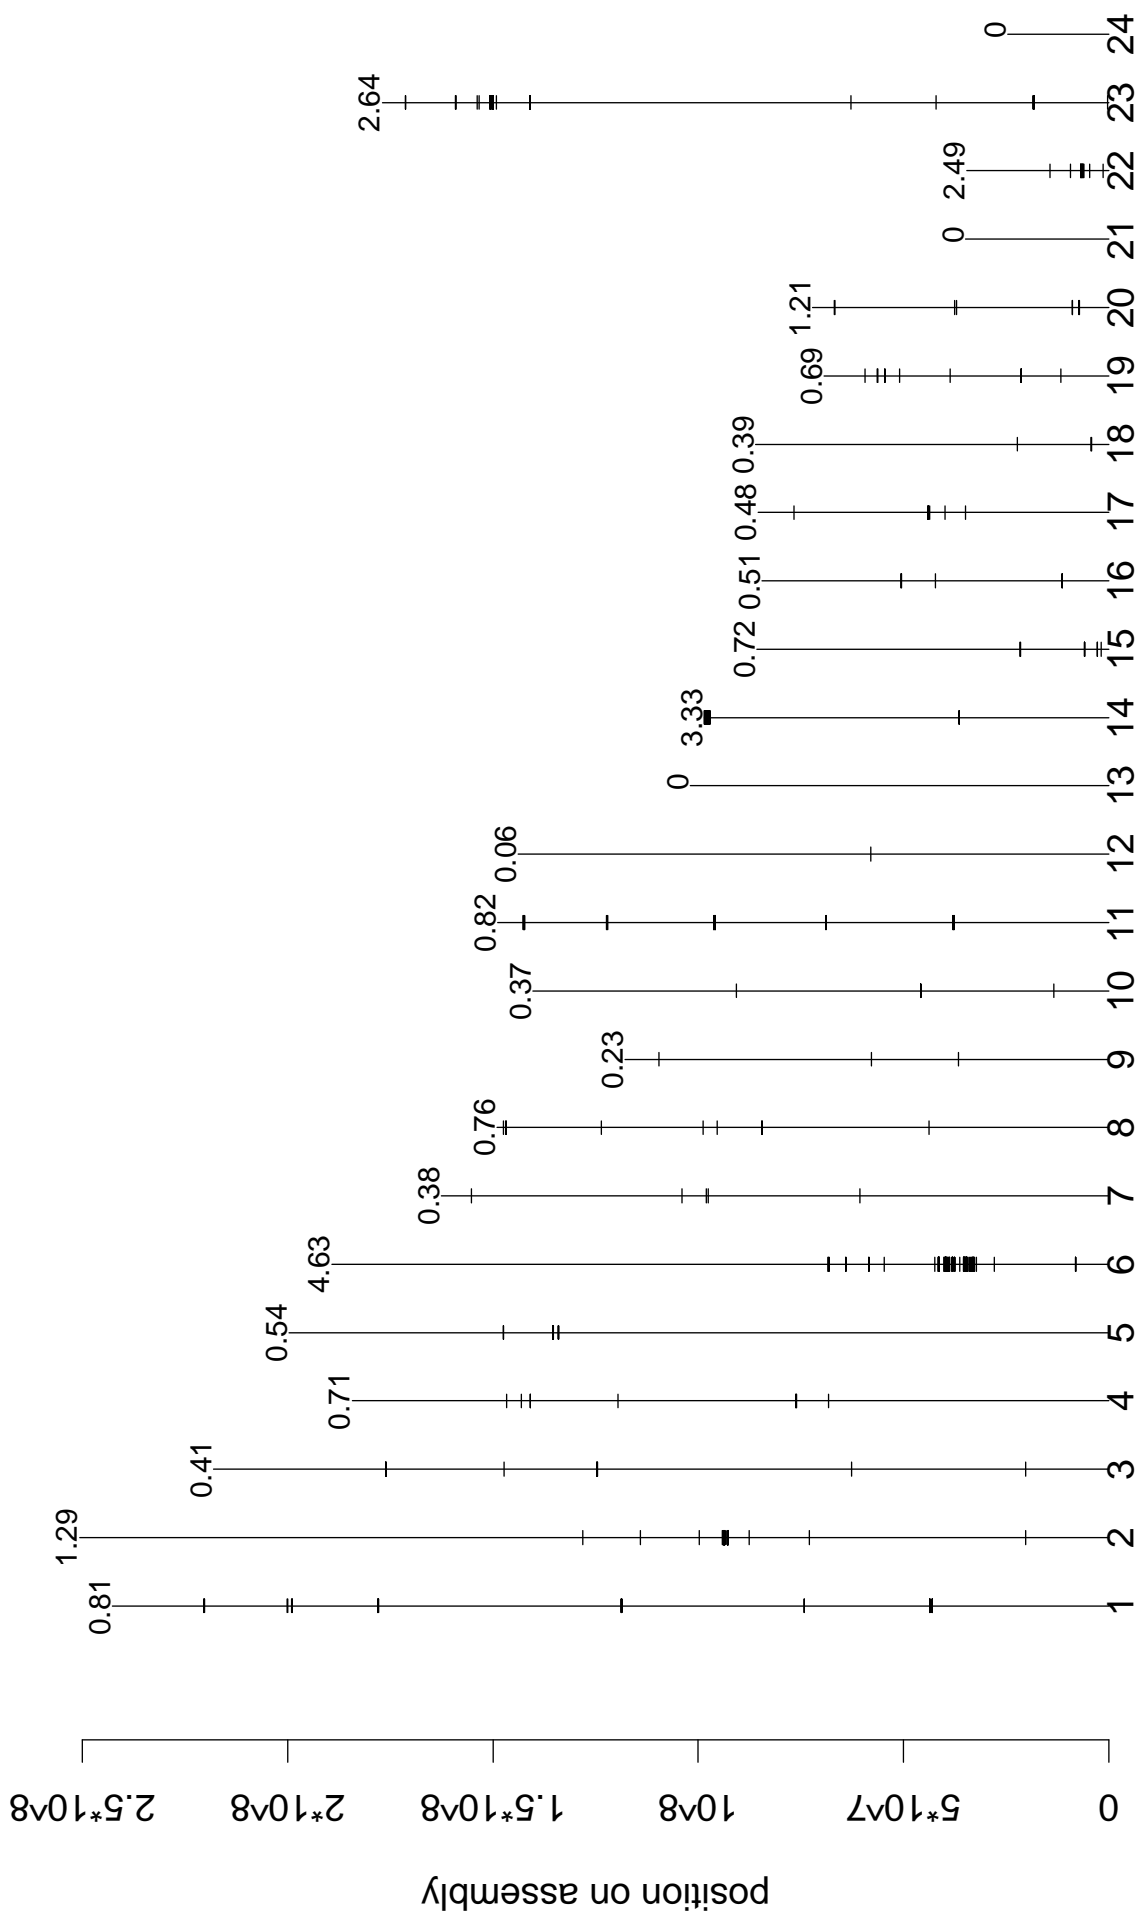

Chromosome

# Ion transport

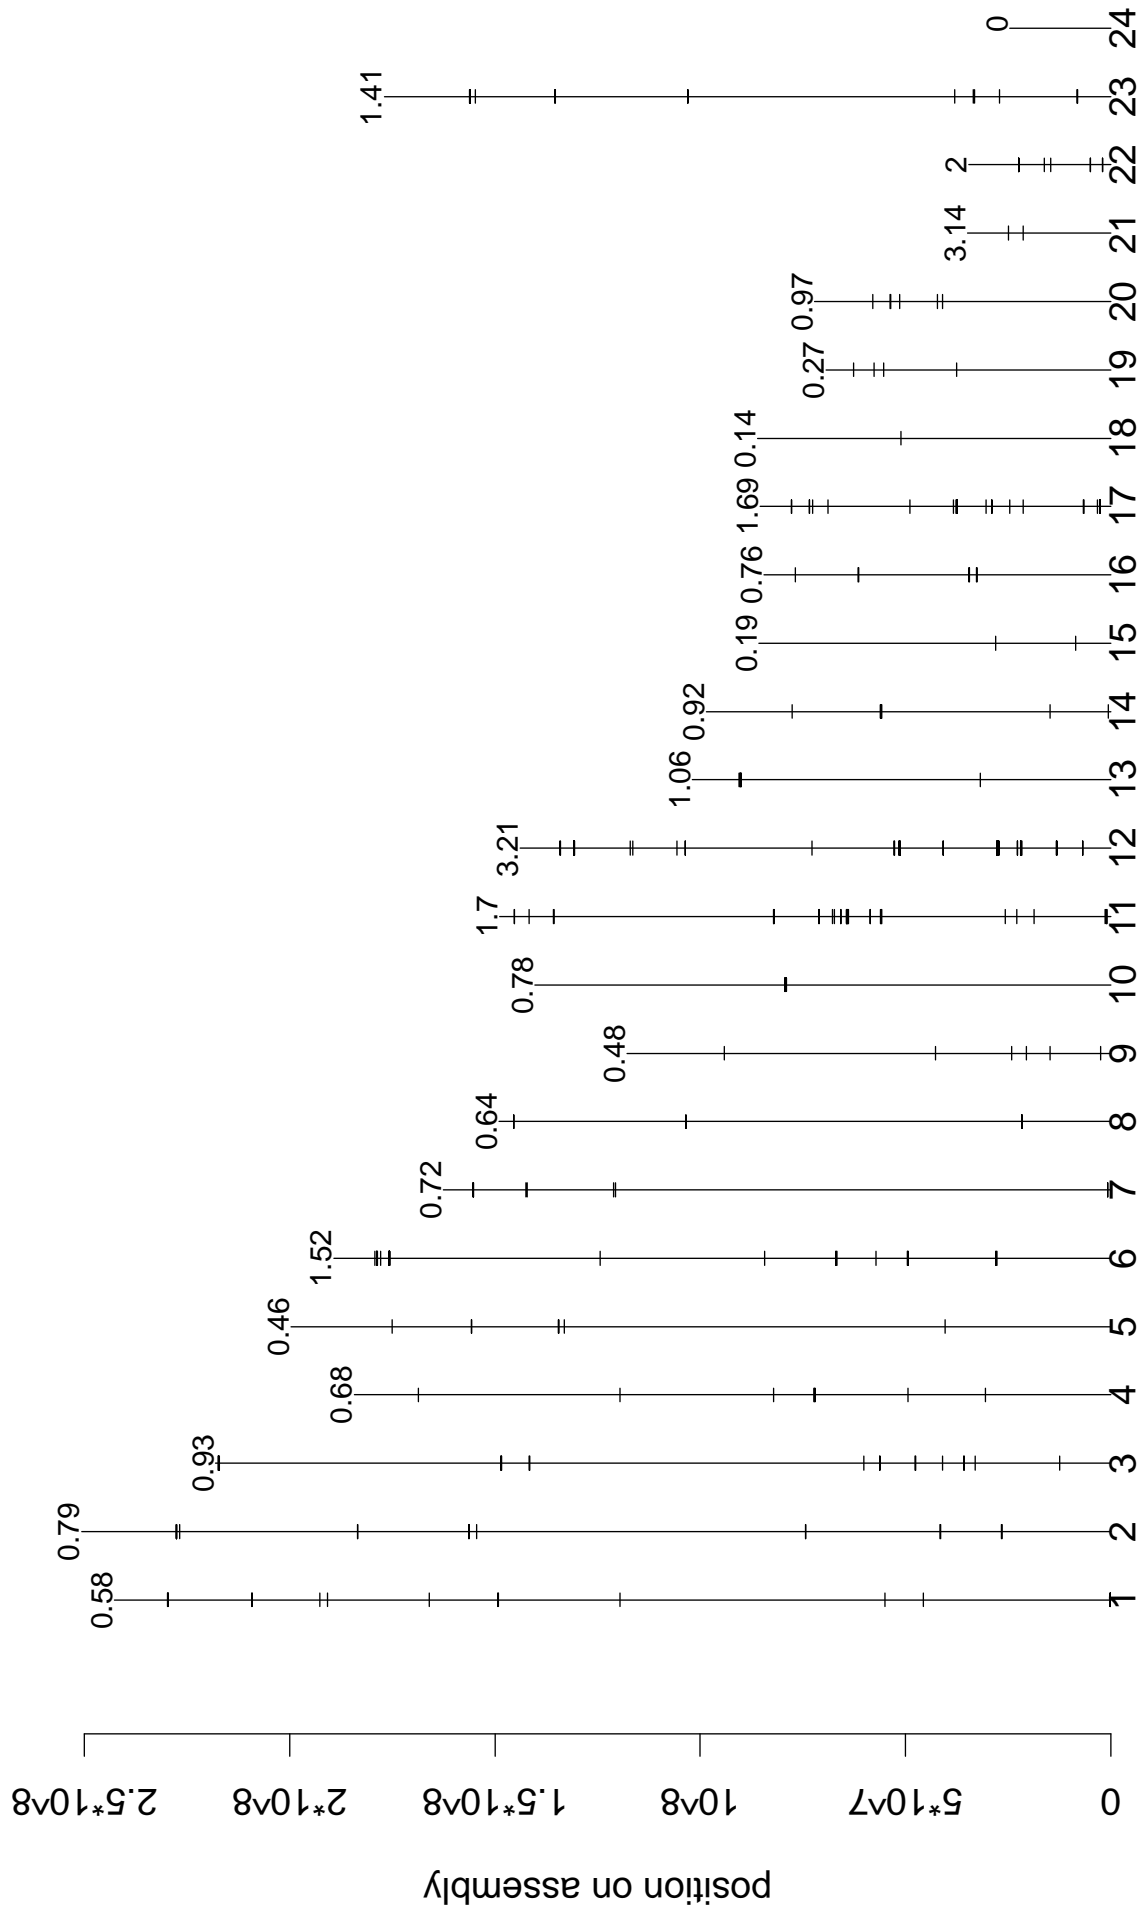

Chromosome

# Sensory perception

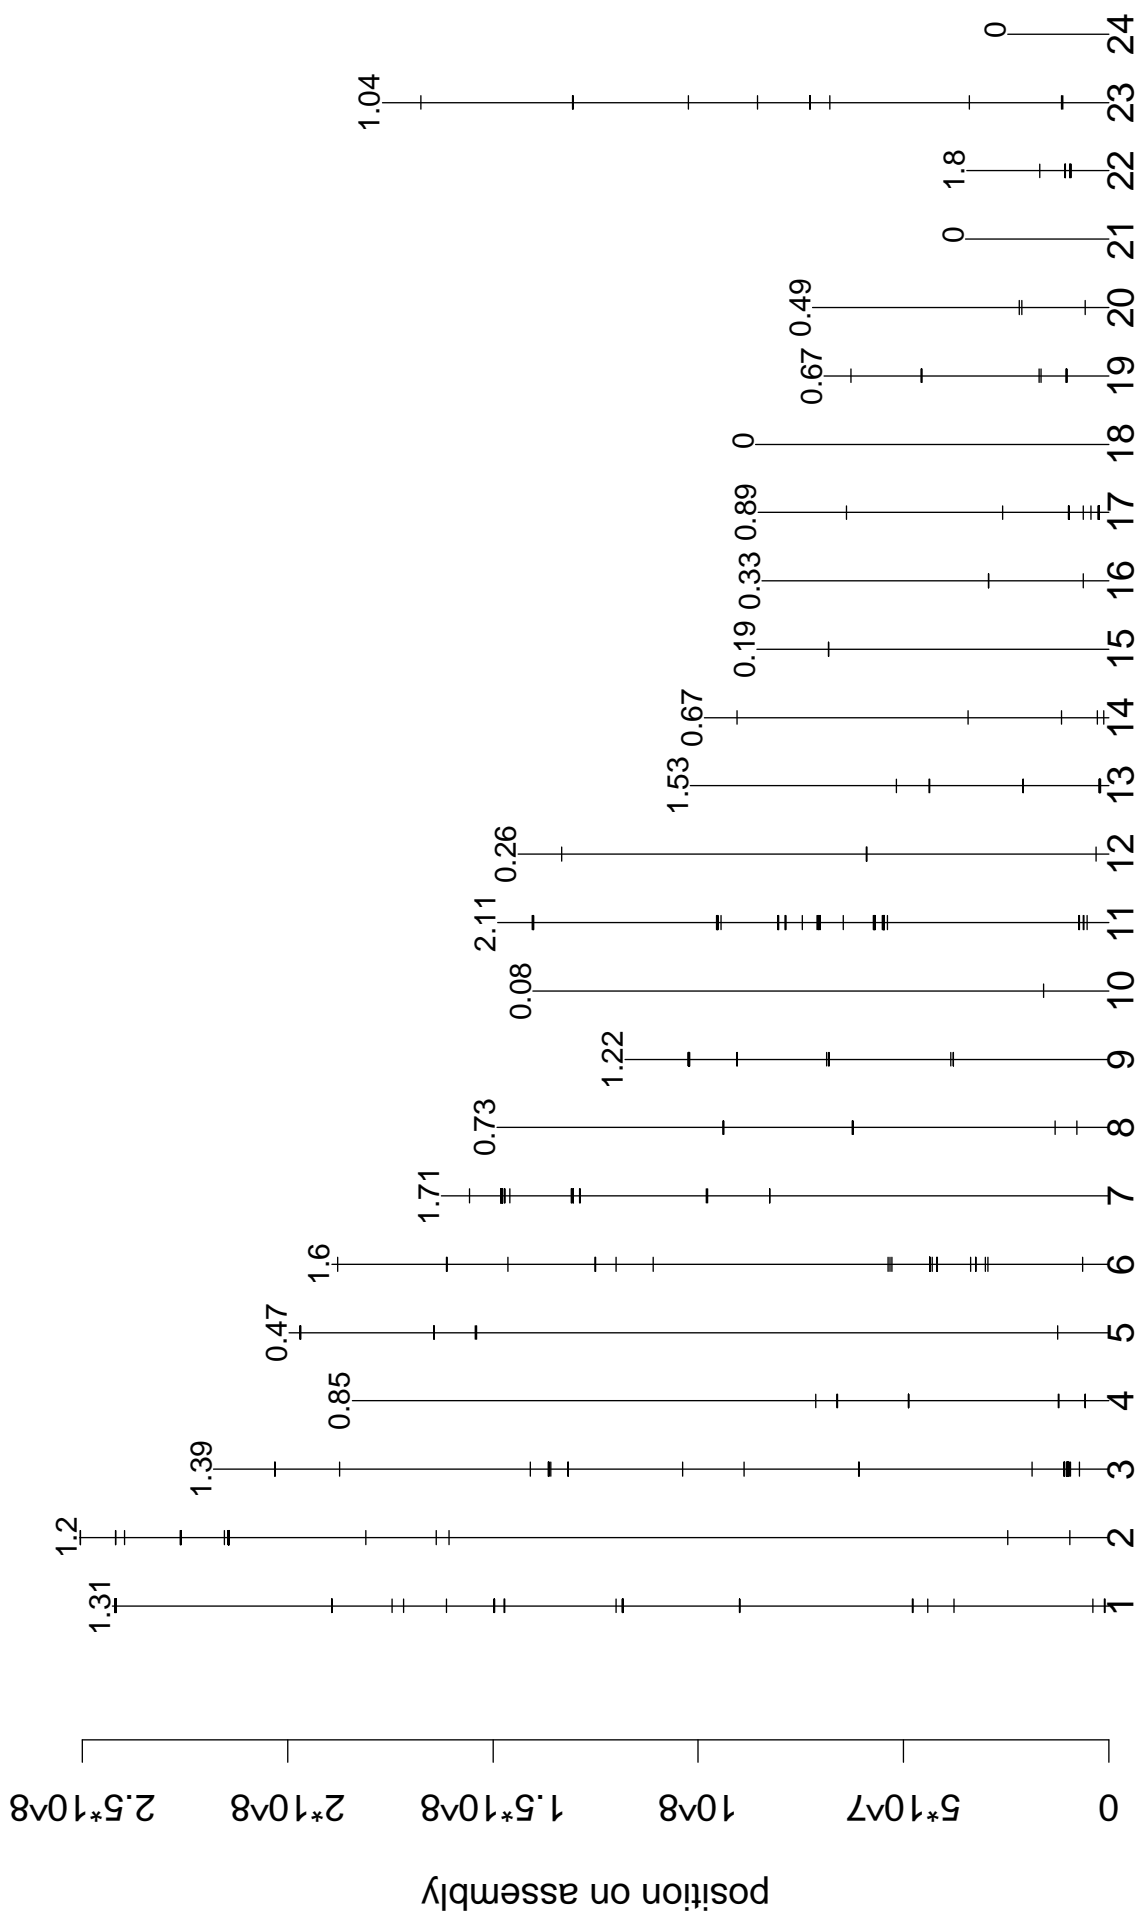

Chromosome

# Extracellular matrix

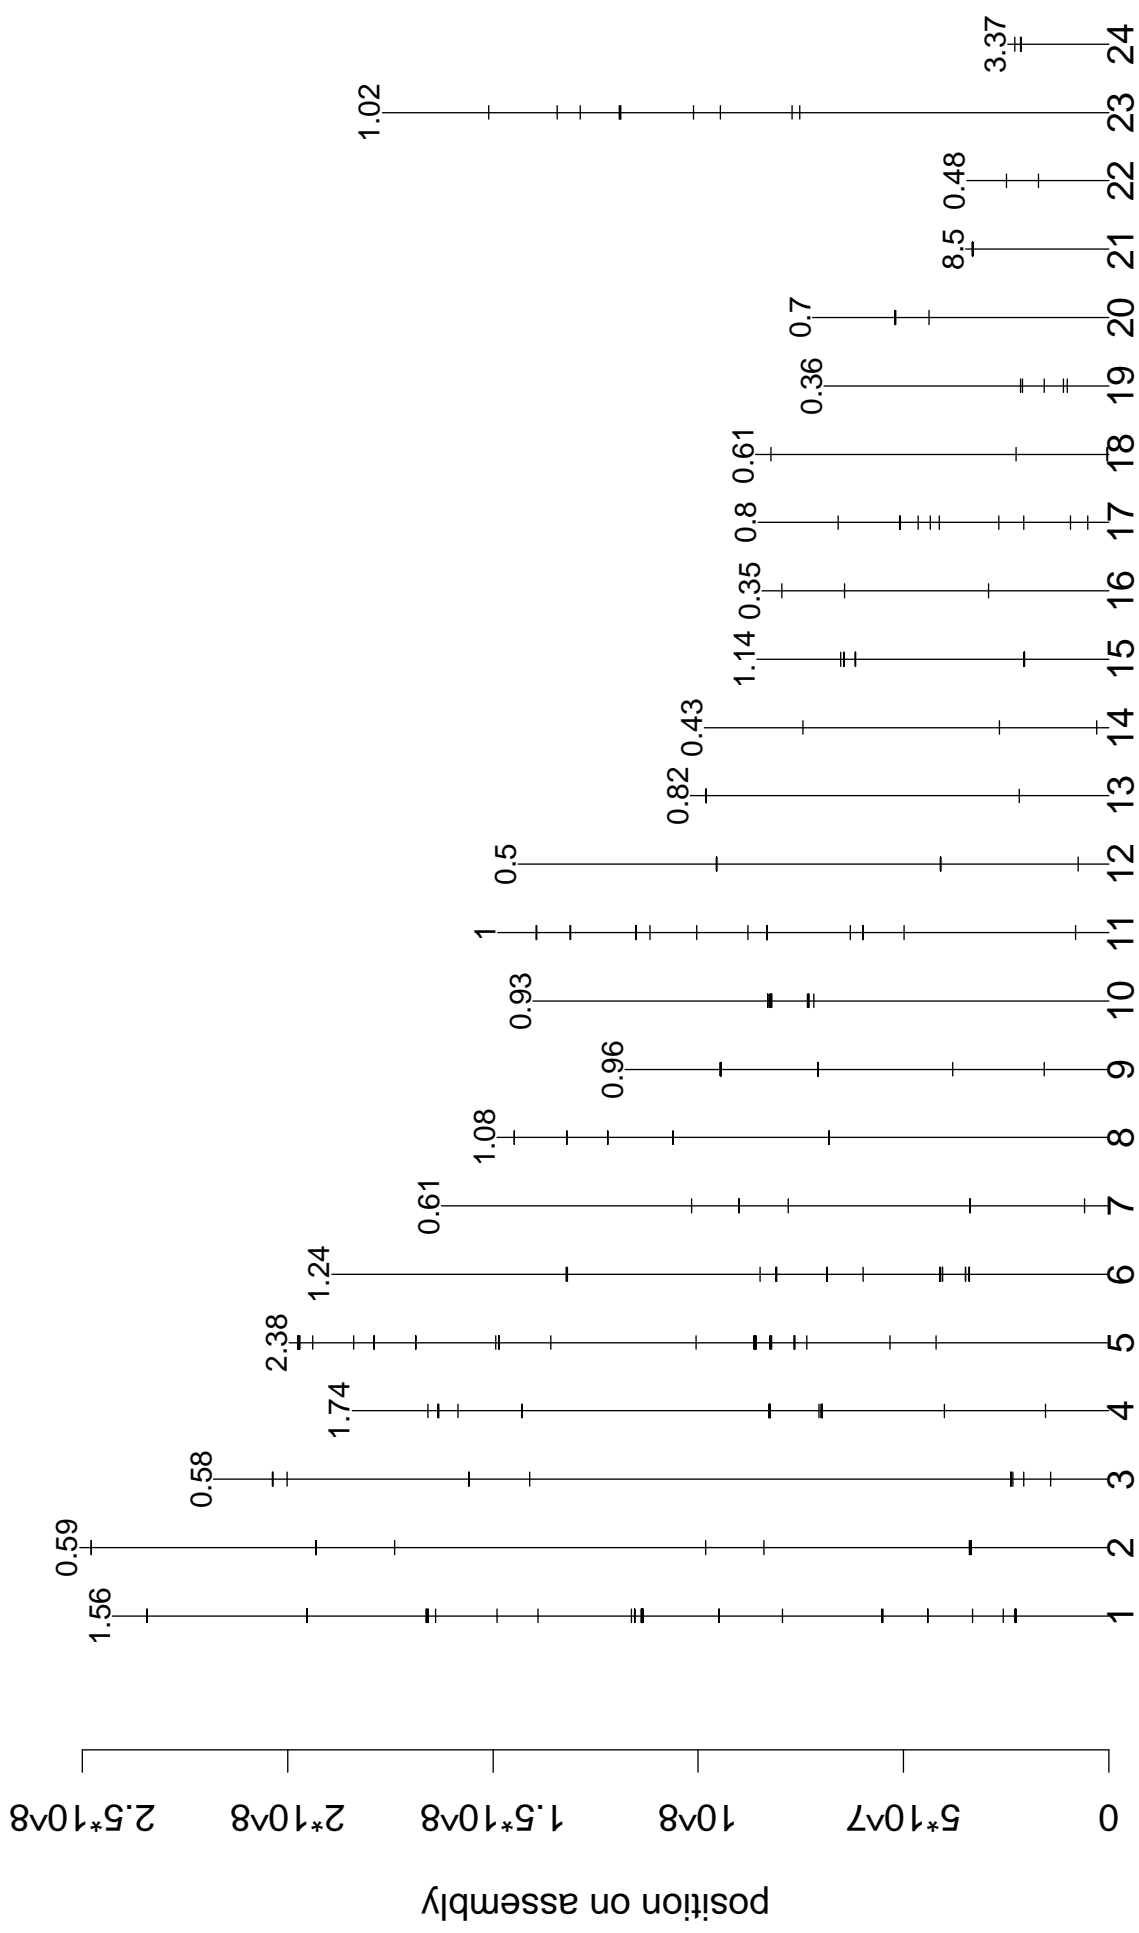

Chromosome

# Cell cycle

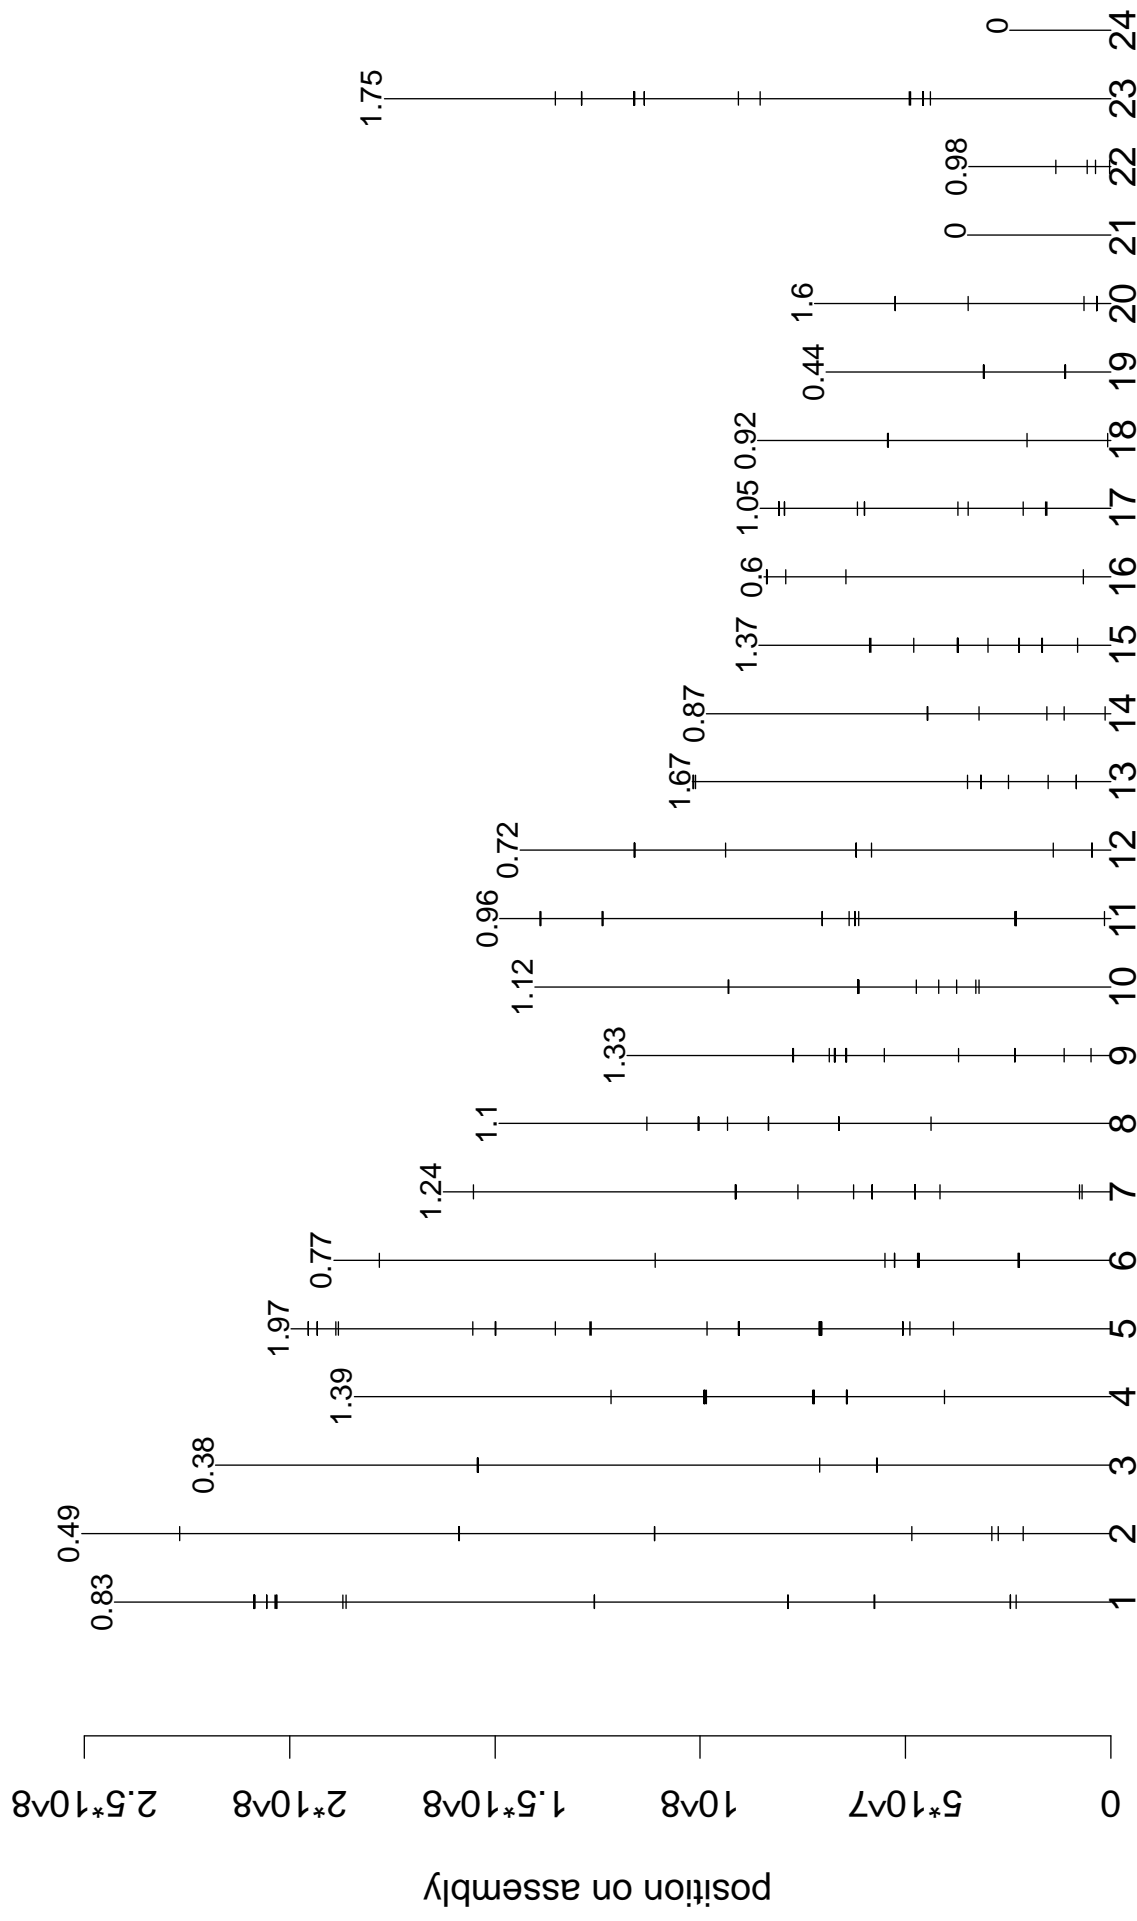

# Developmental process

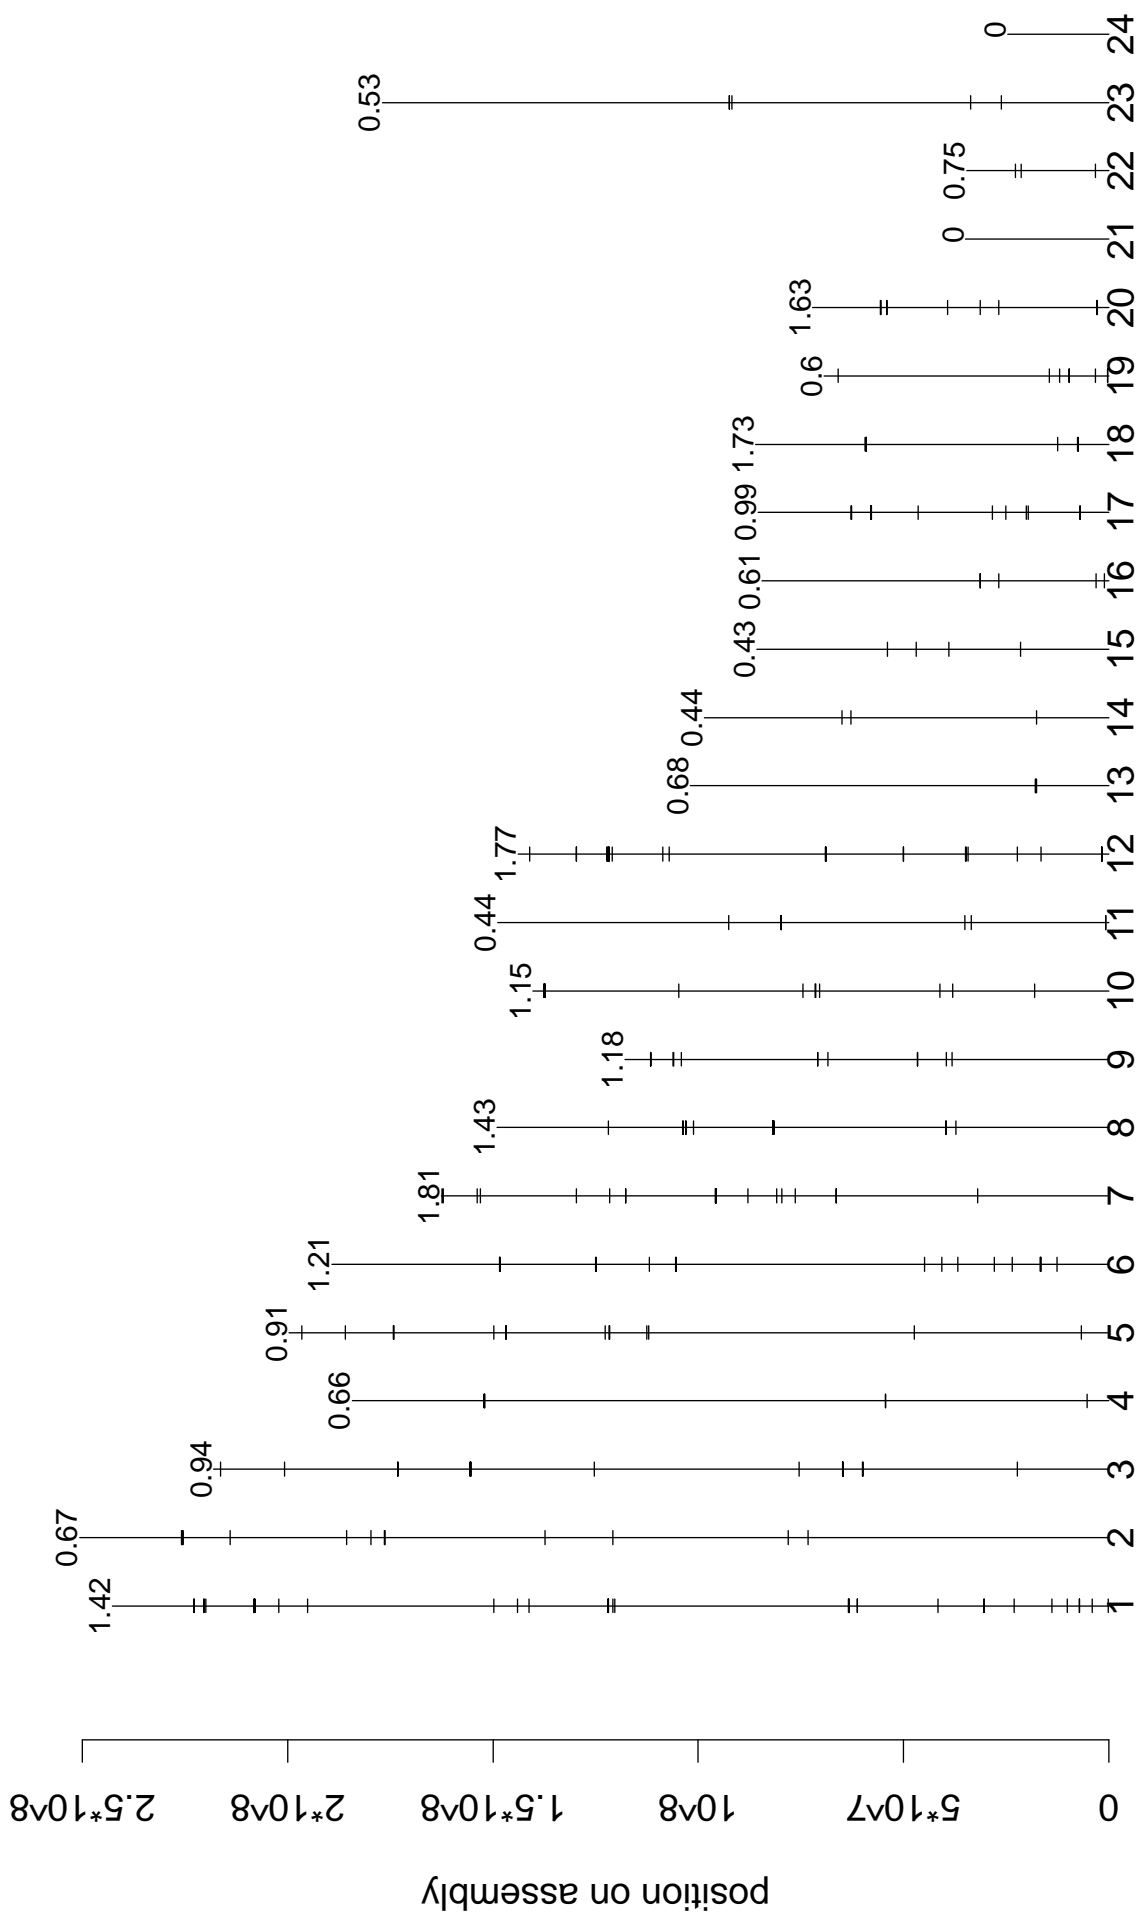

# Carbohydrate metabolism

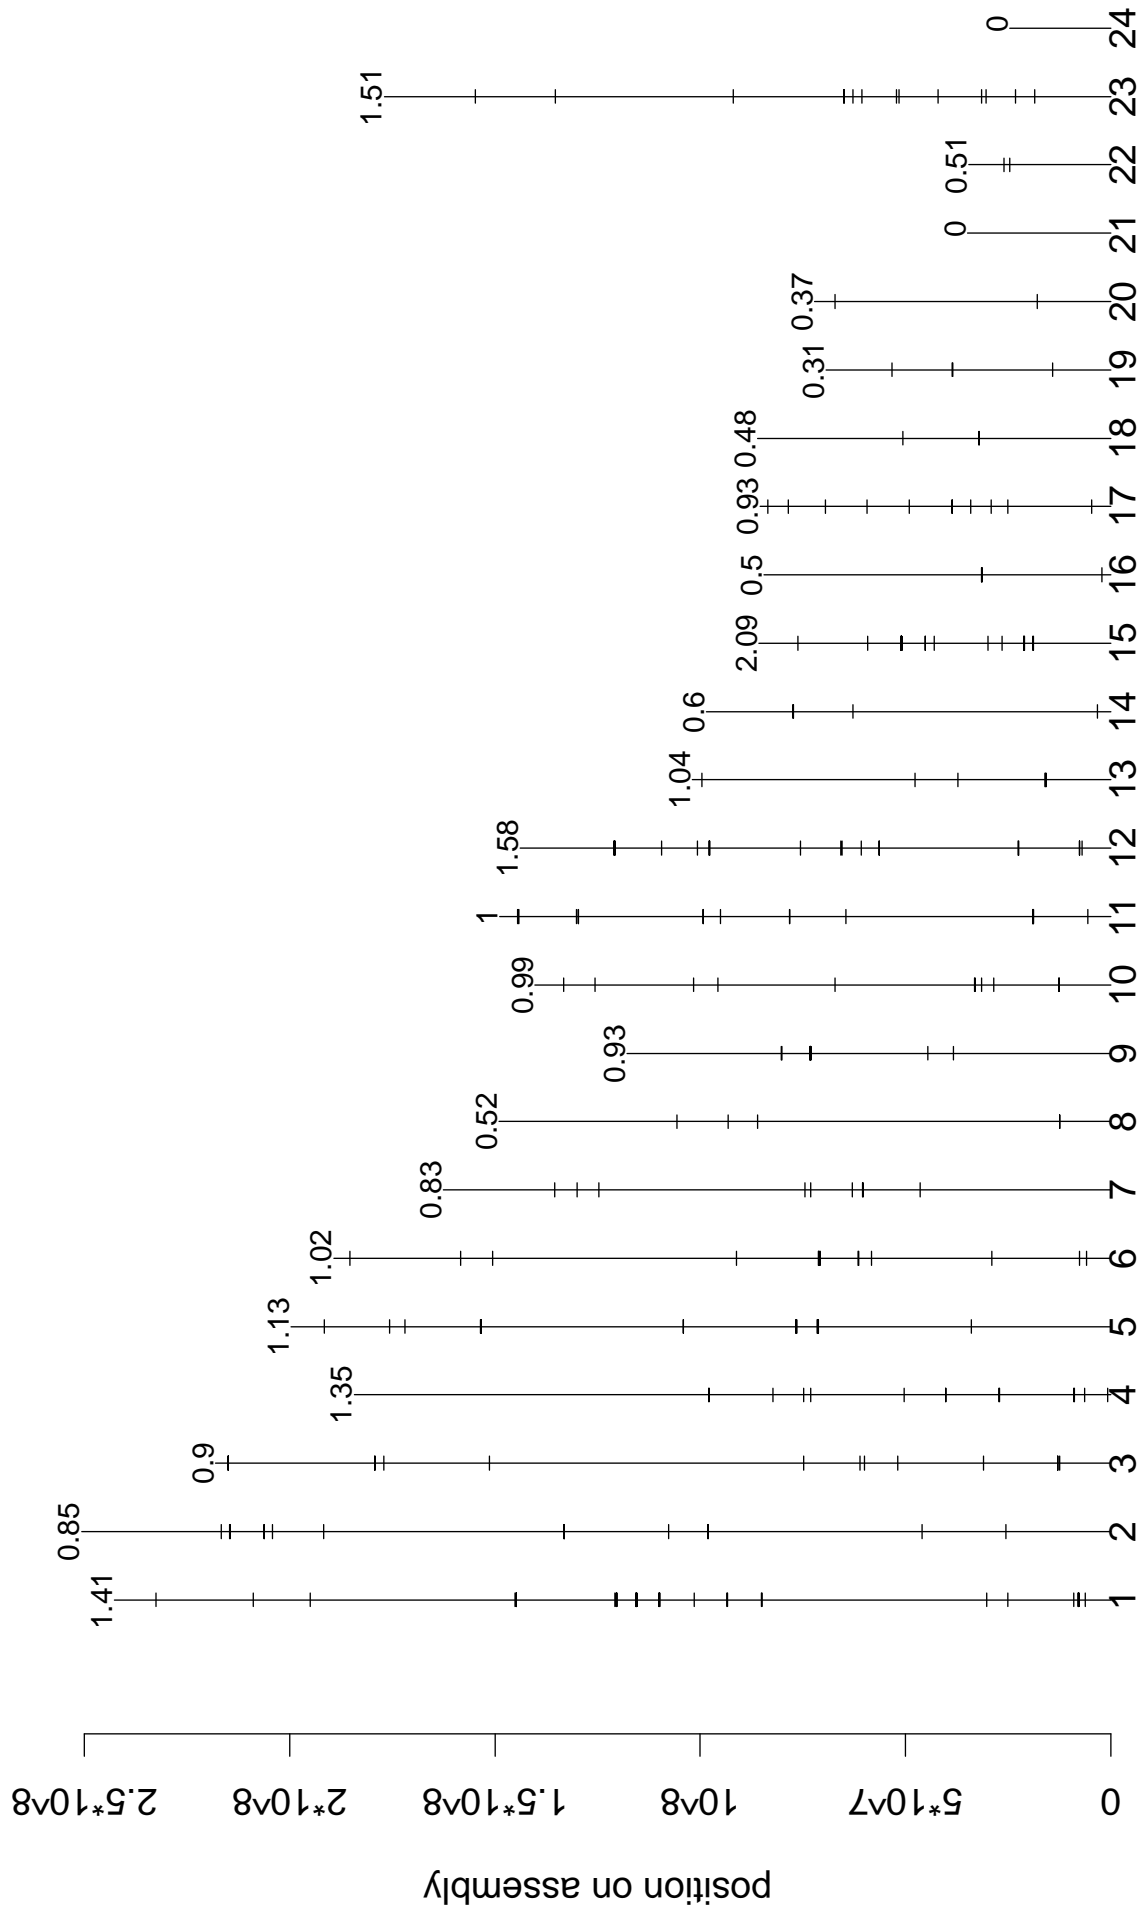

Chromosome



# Motor protein

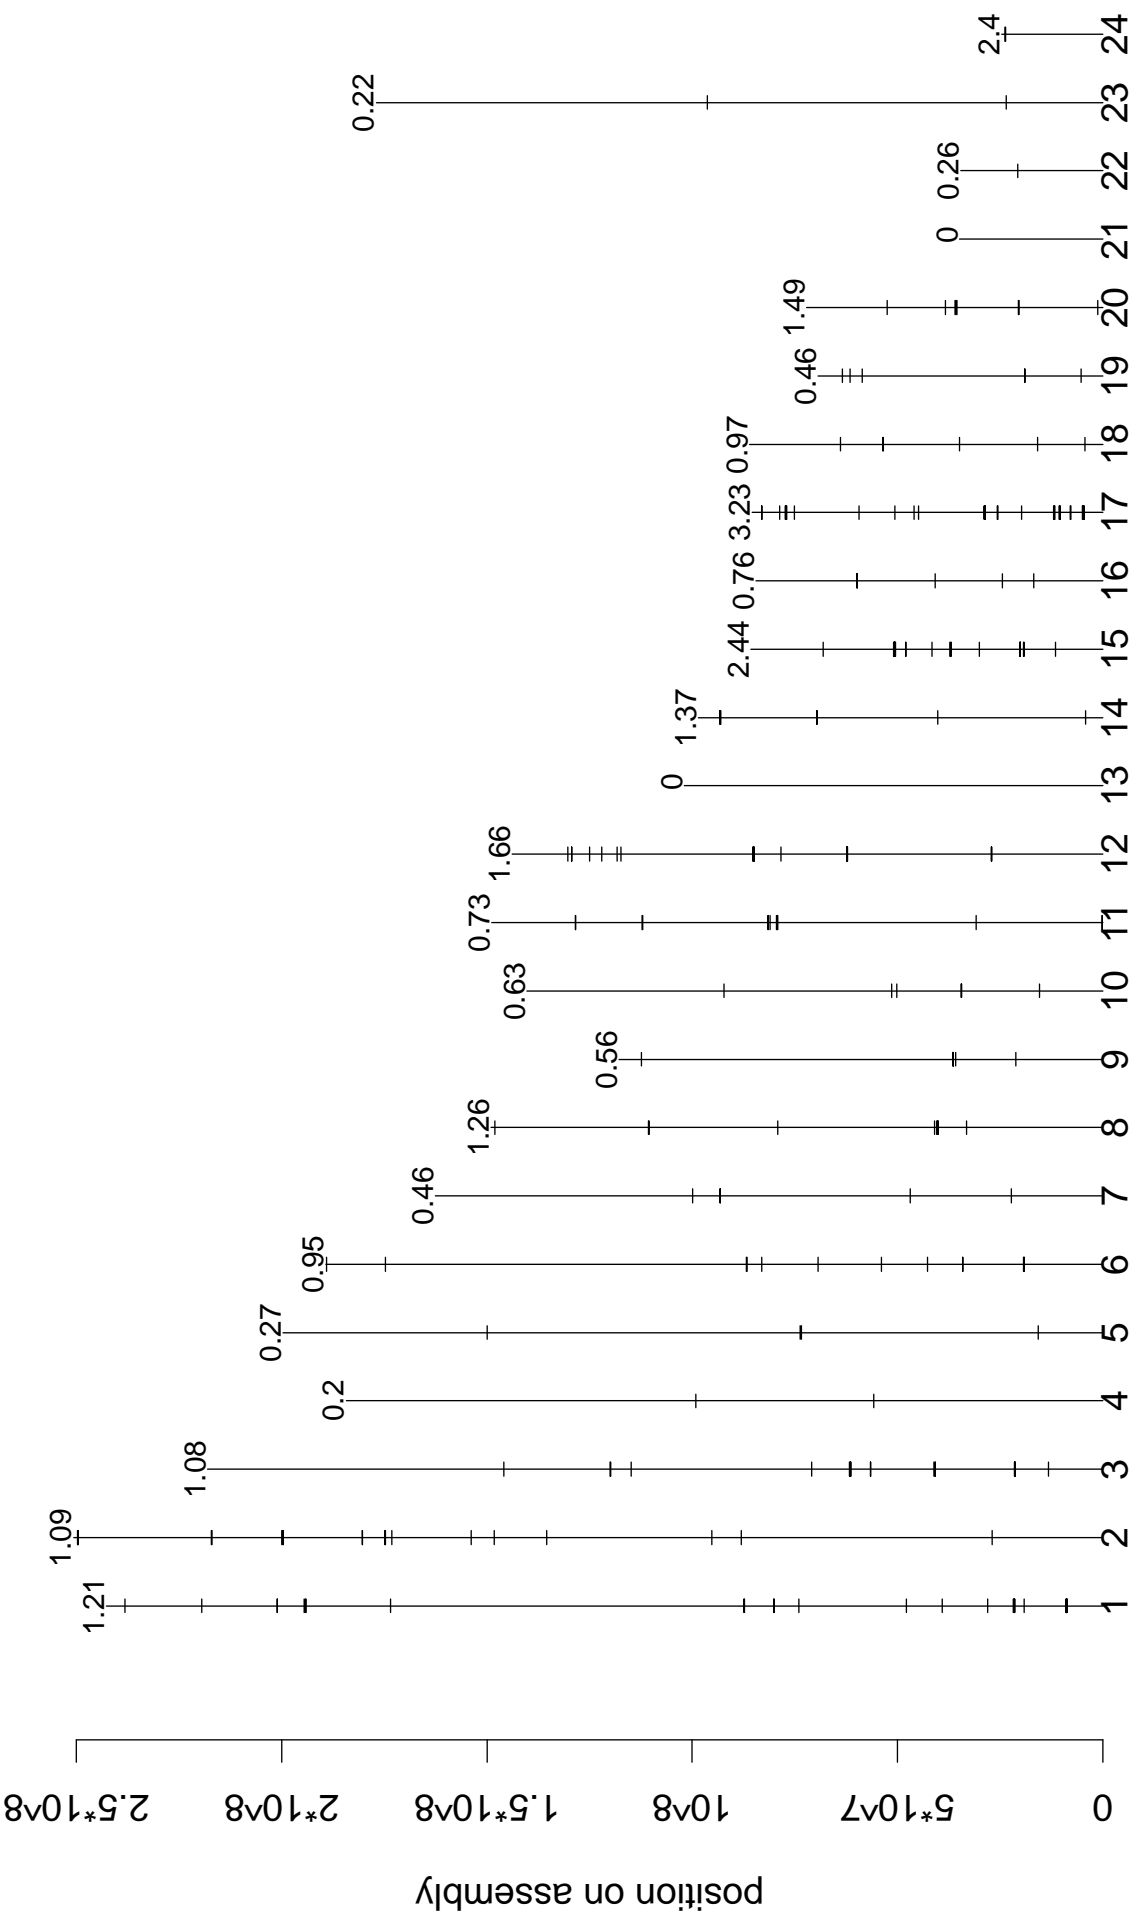

# Protein modification

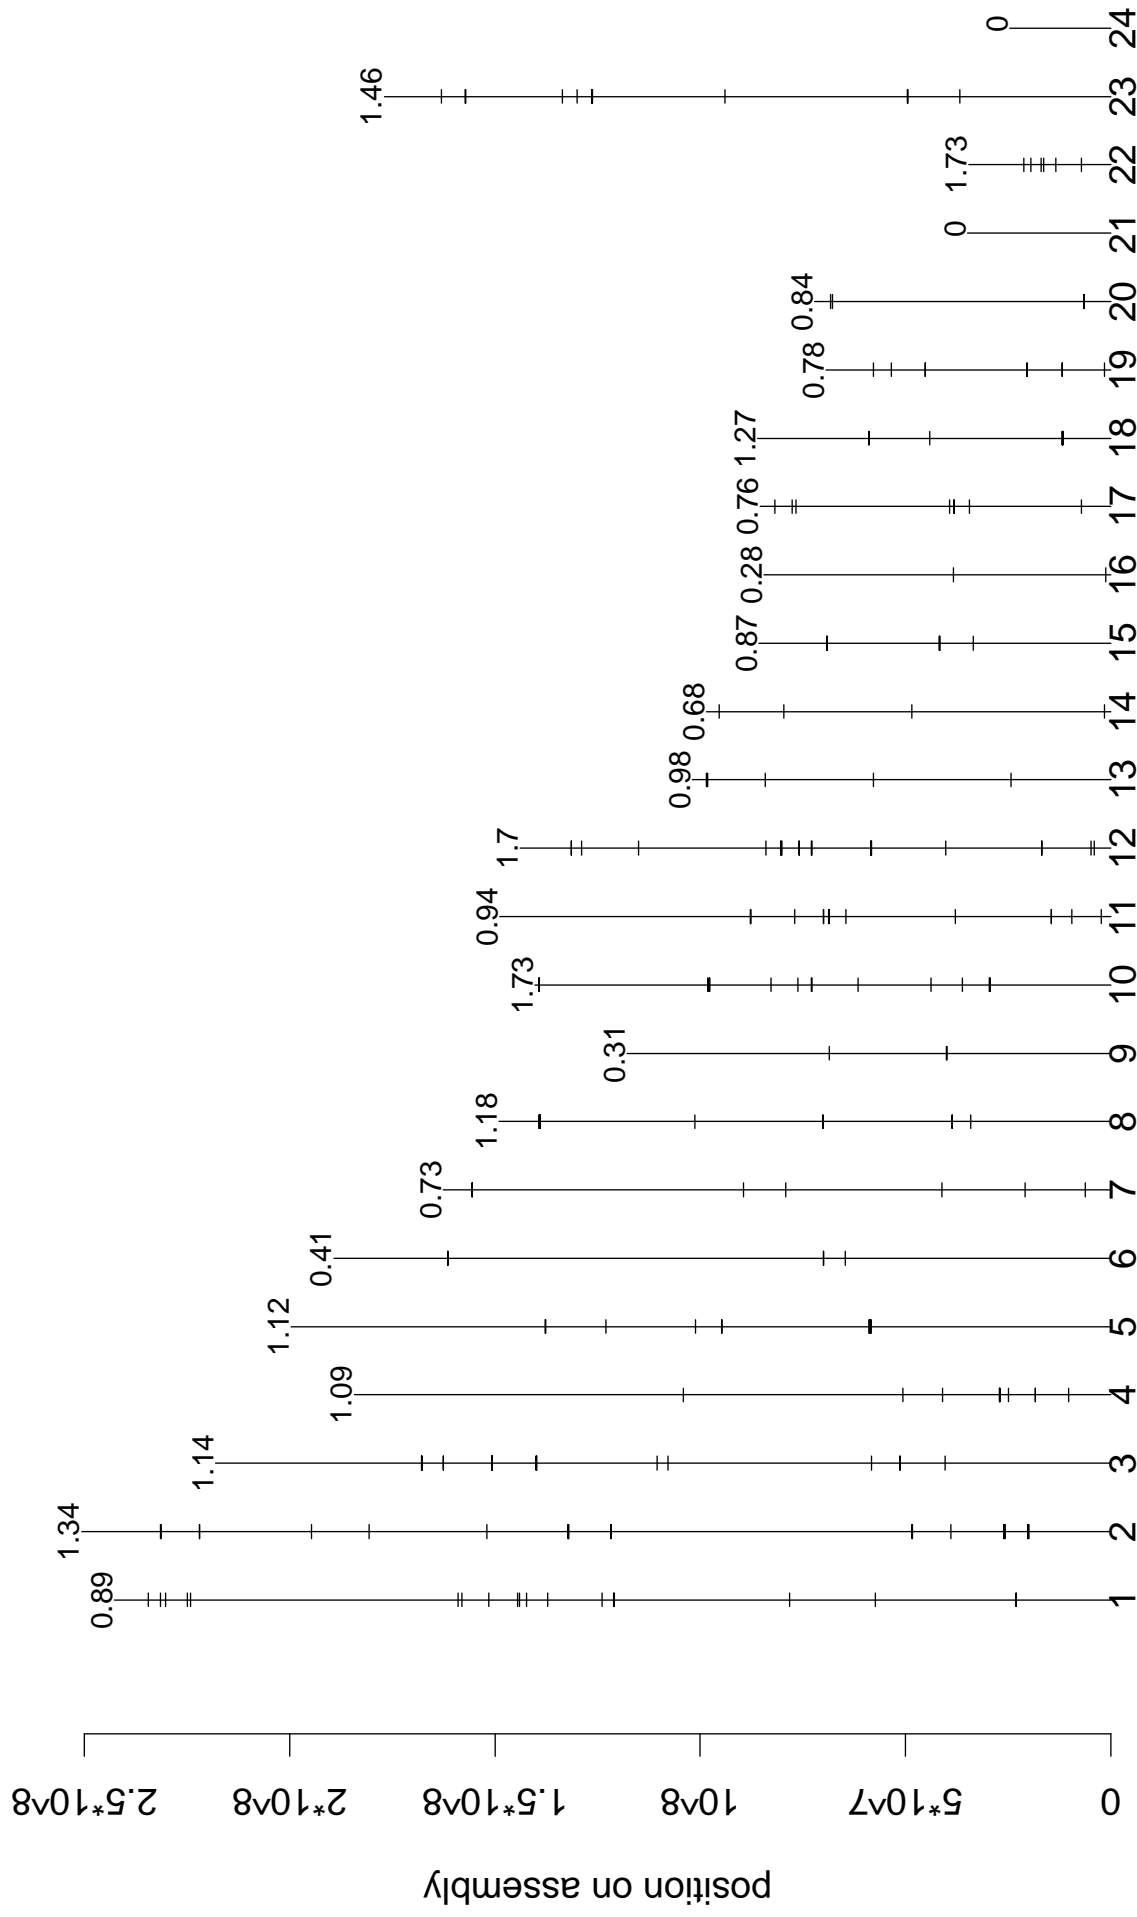

Chromosome

# Protein biosynthesis

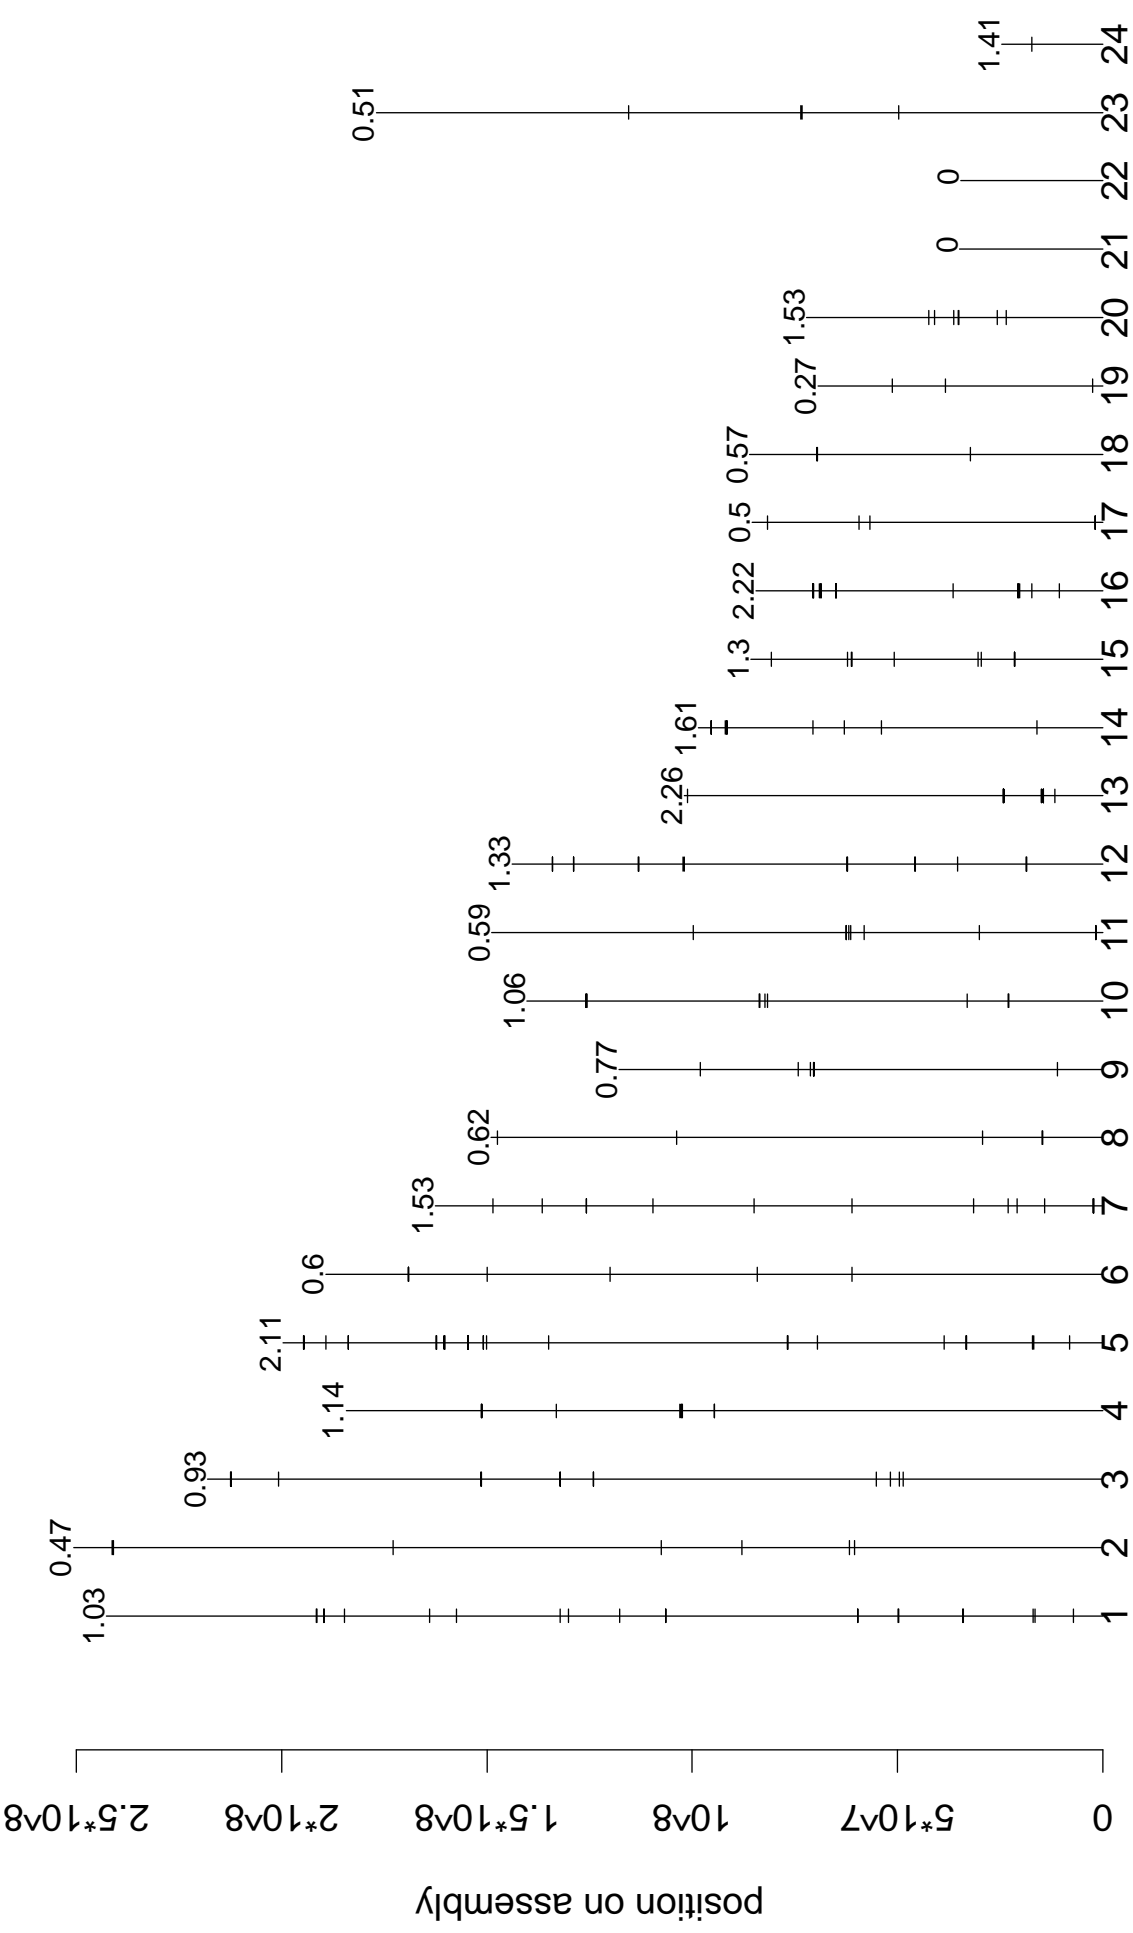

Chromosome

# Organelle organization and biogenesis

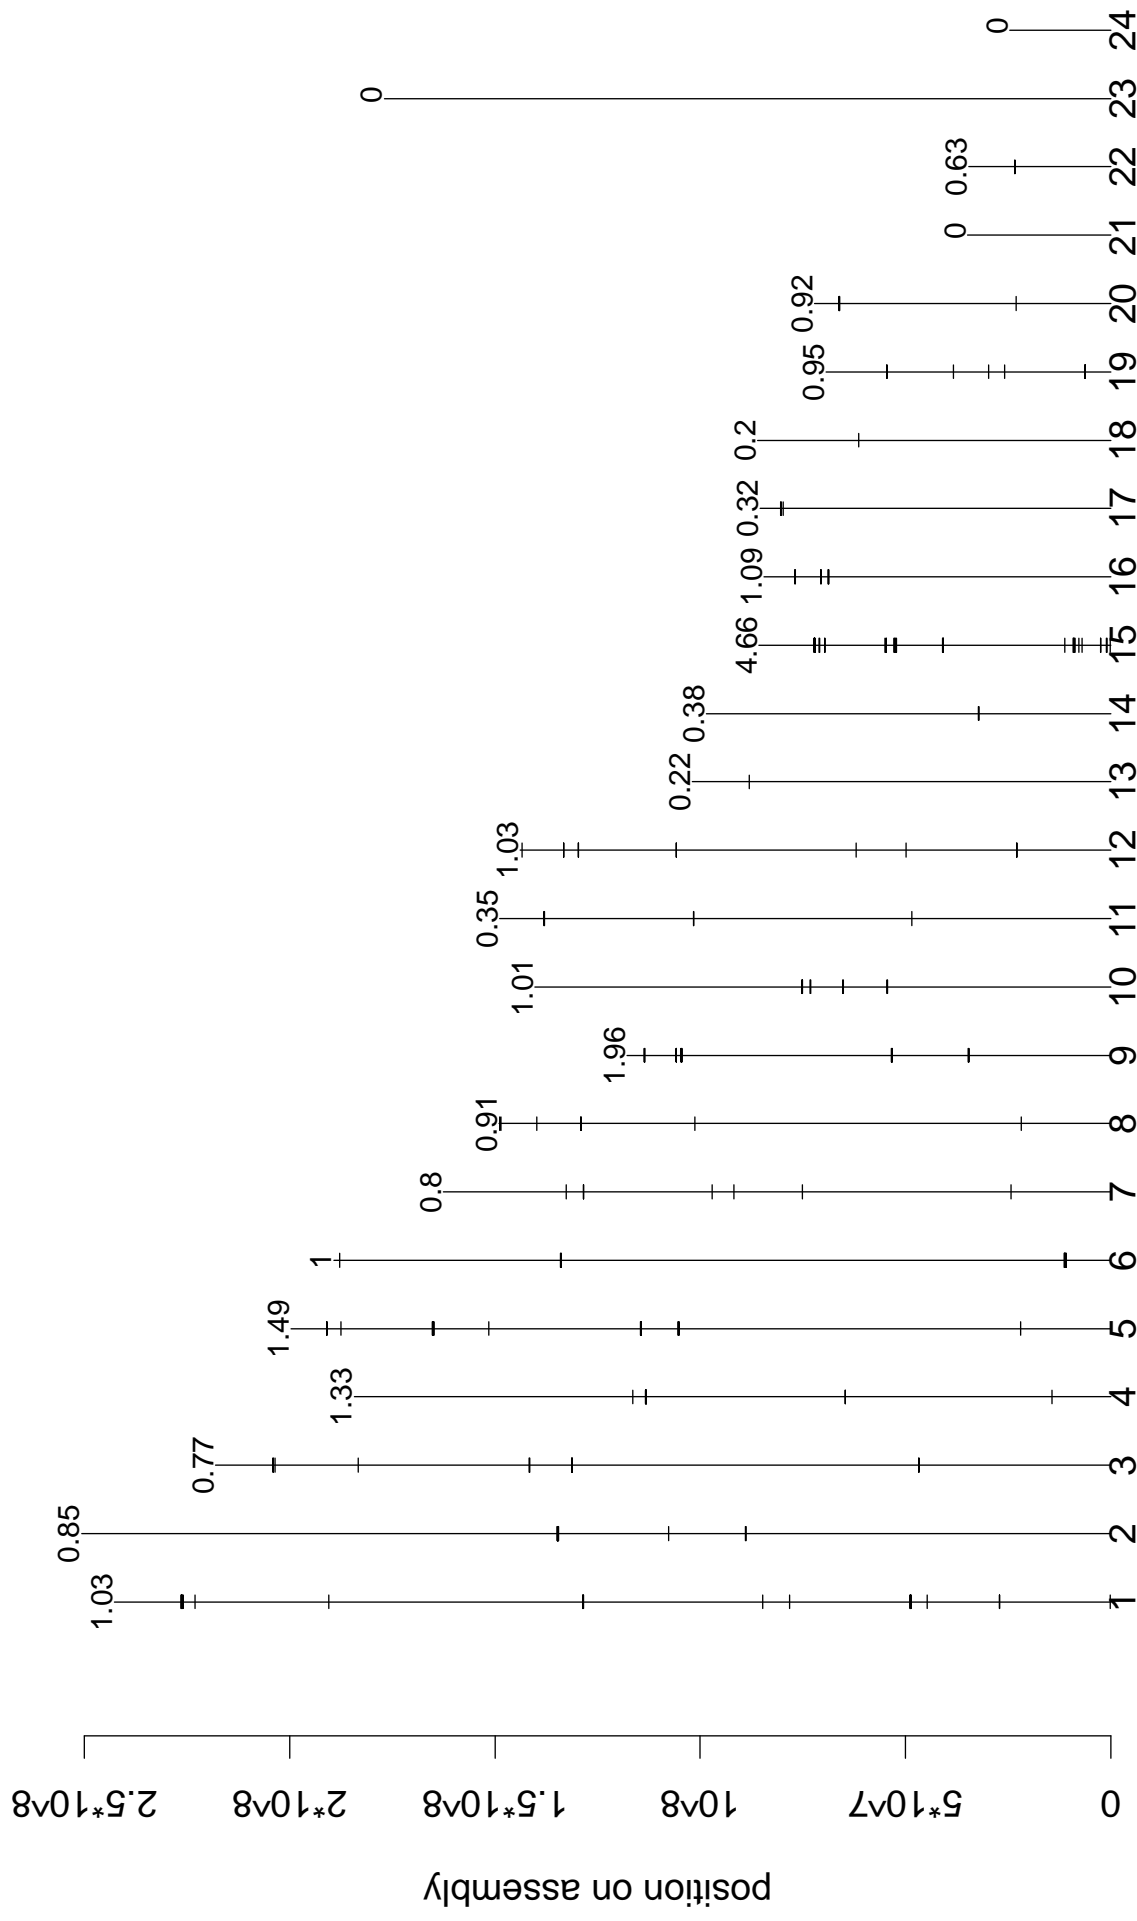

Chromosome

# Ion channel

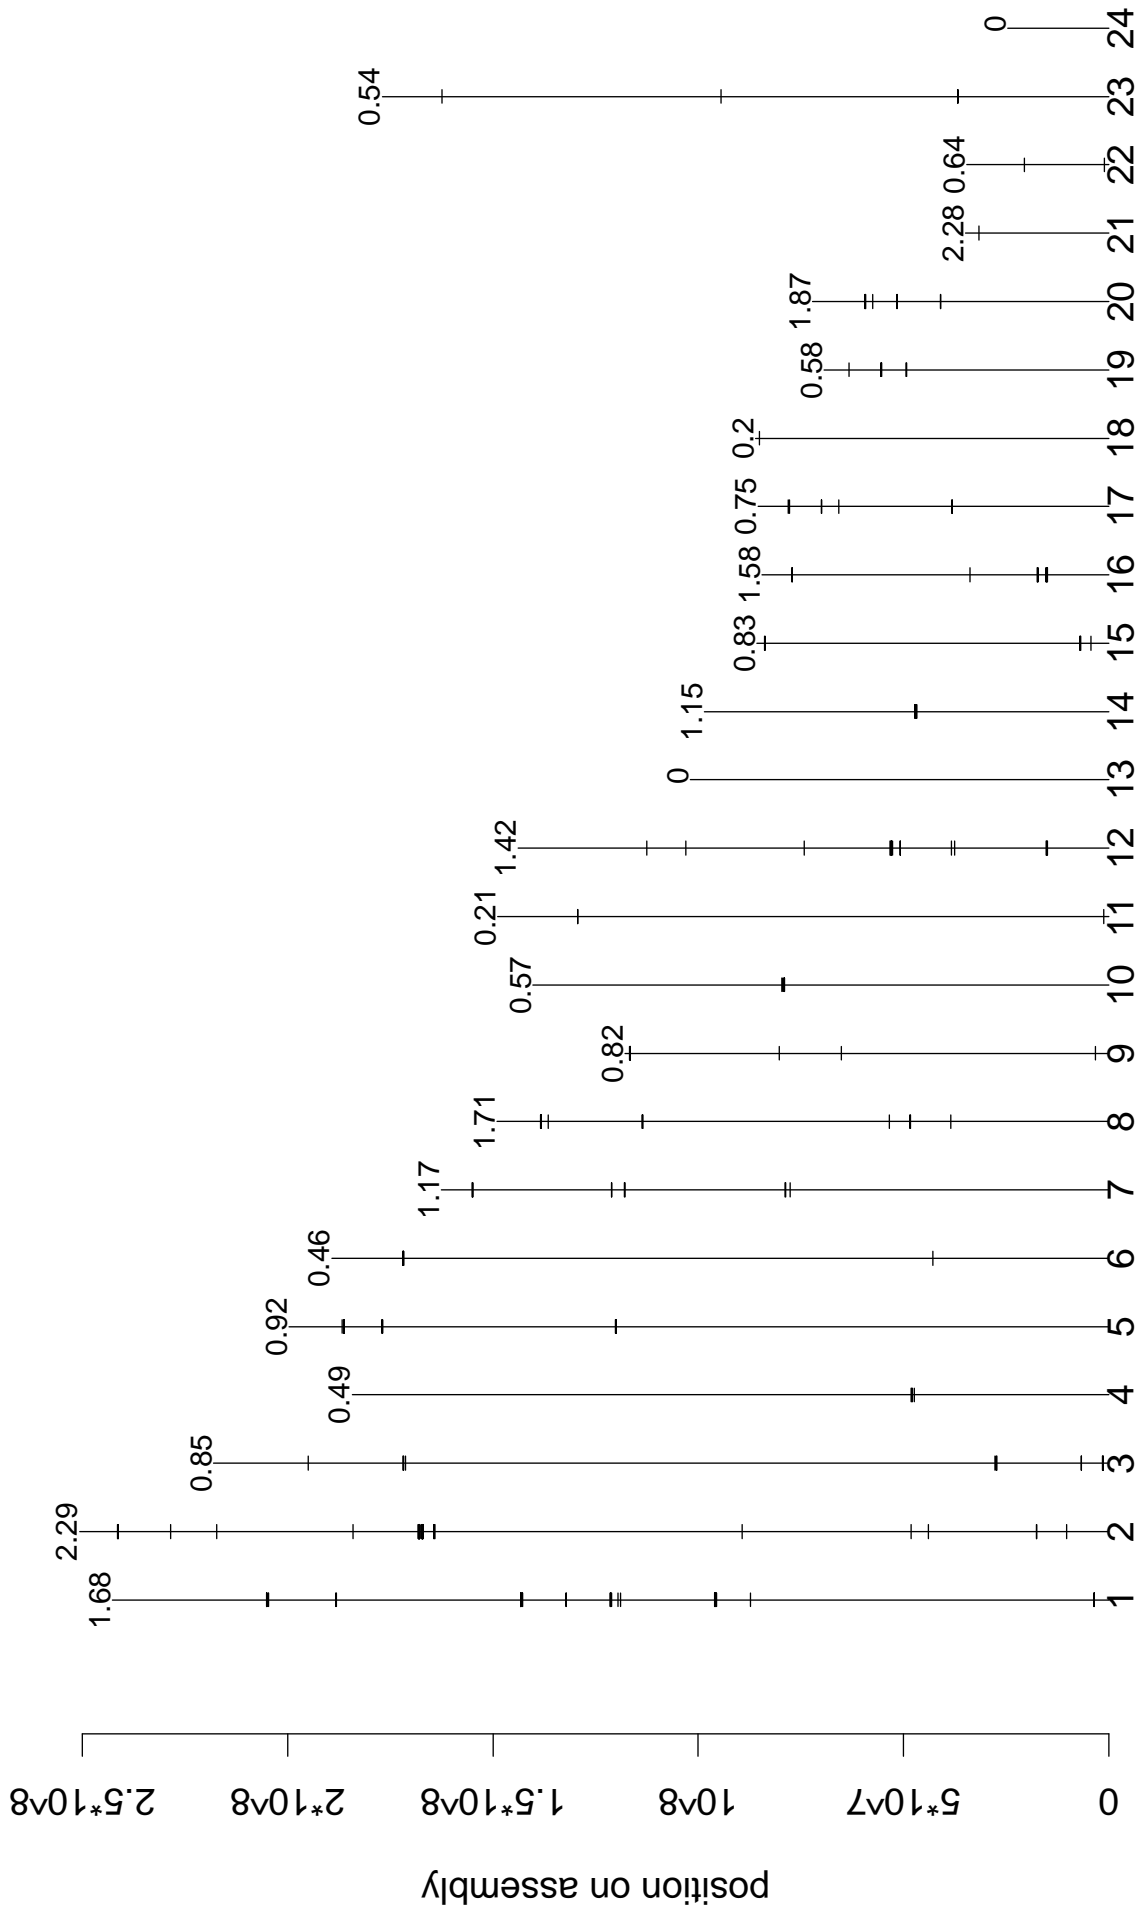

# Cell communication

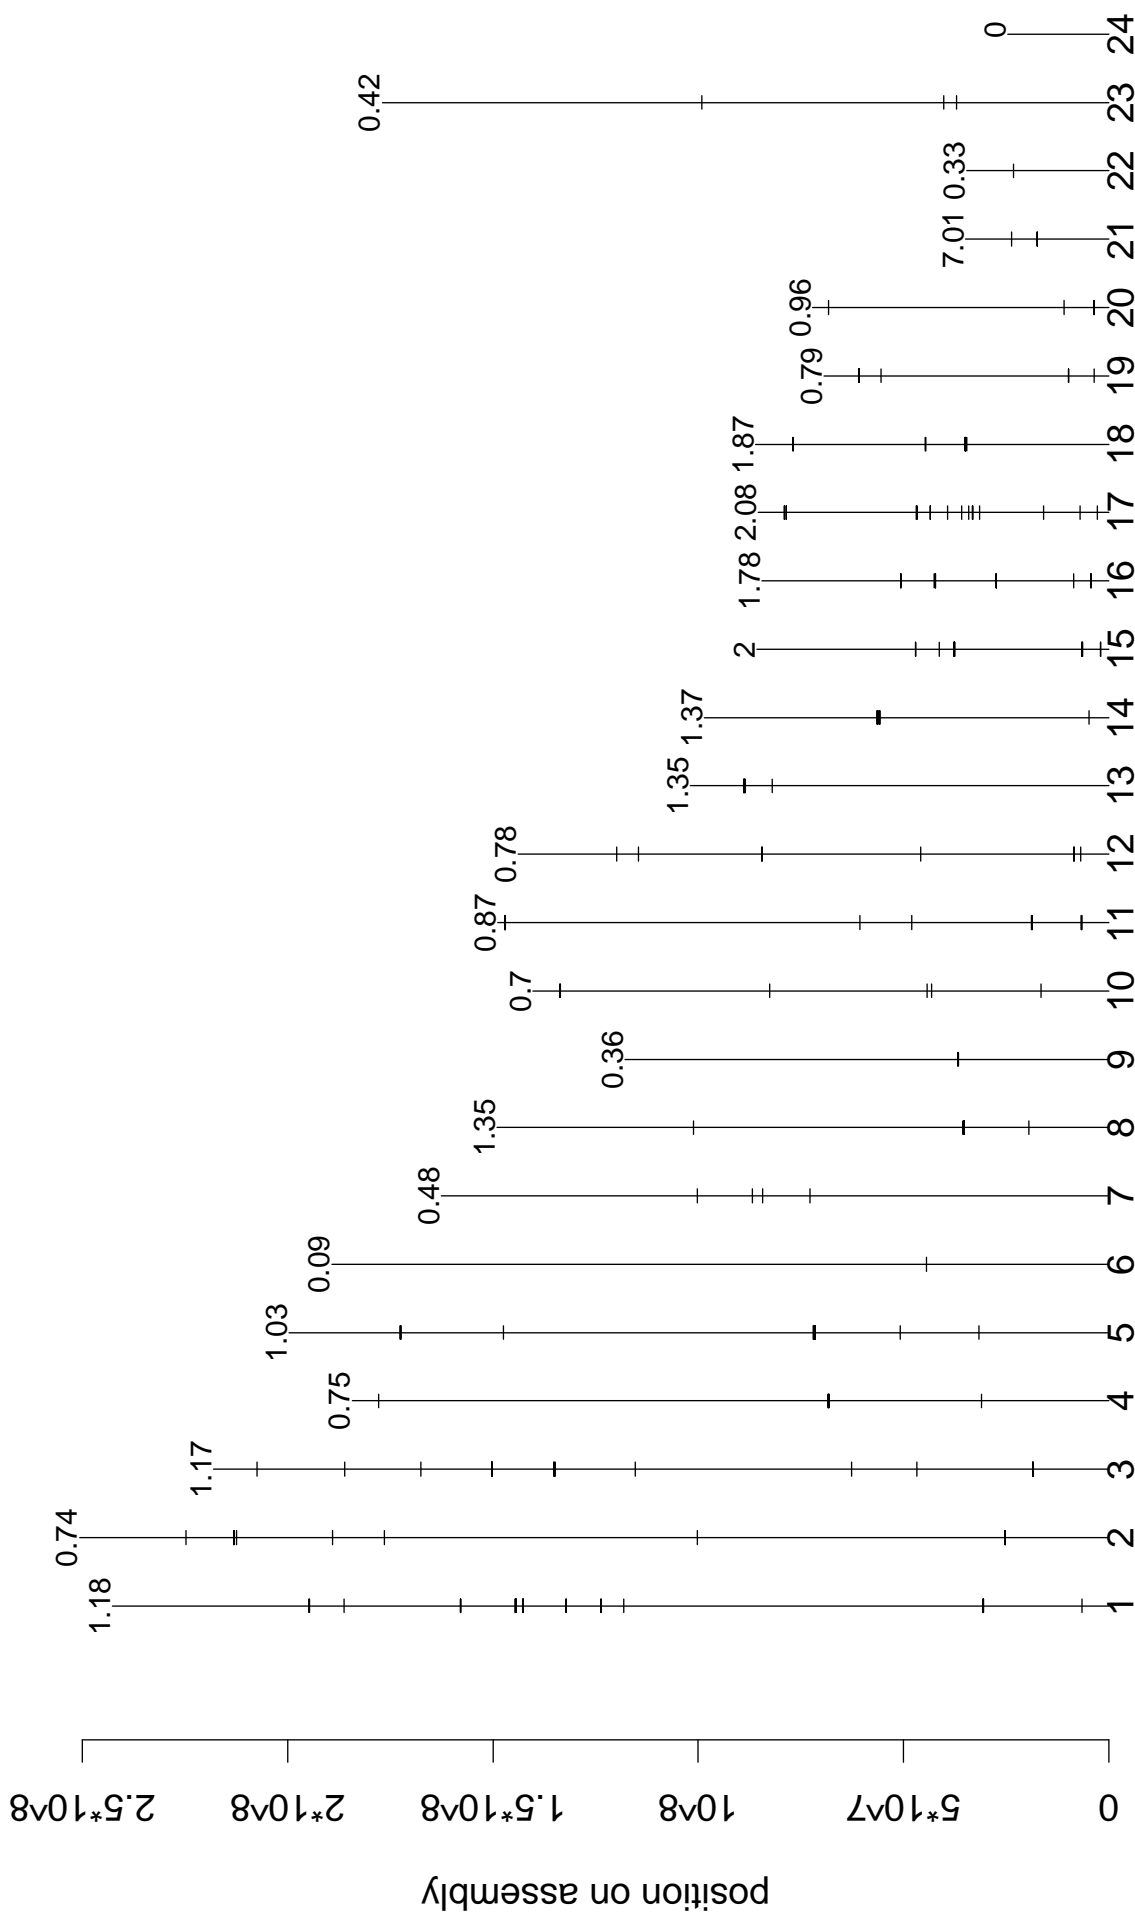

# Ion homeostasis

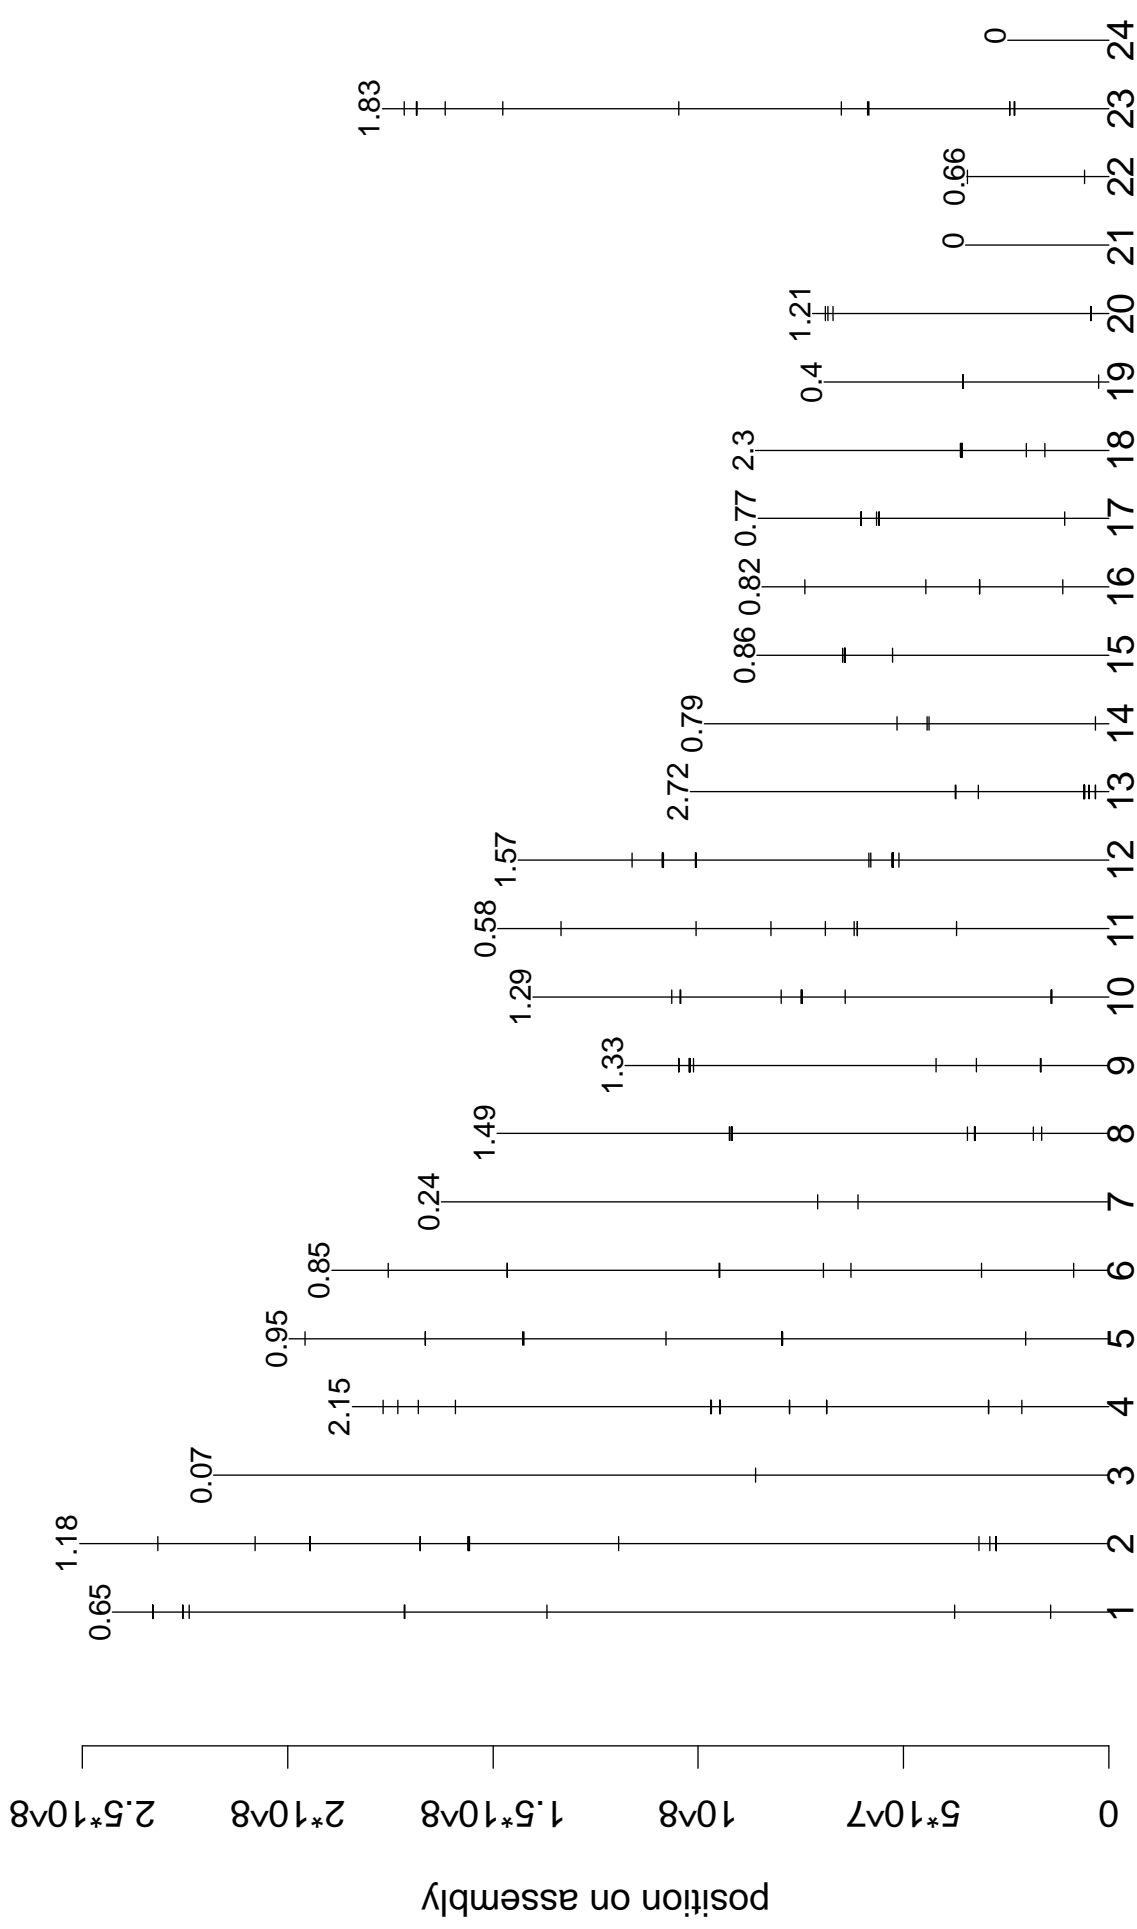

Chromosome

# RNA processing

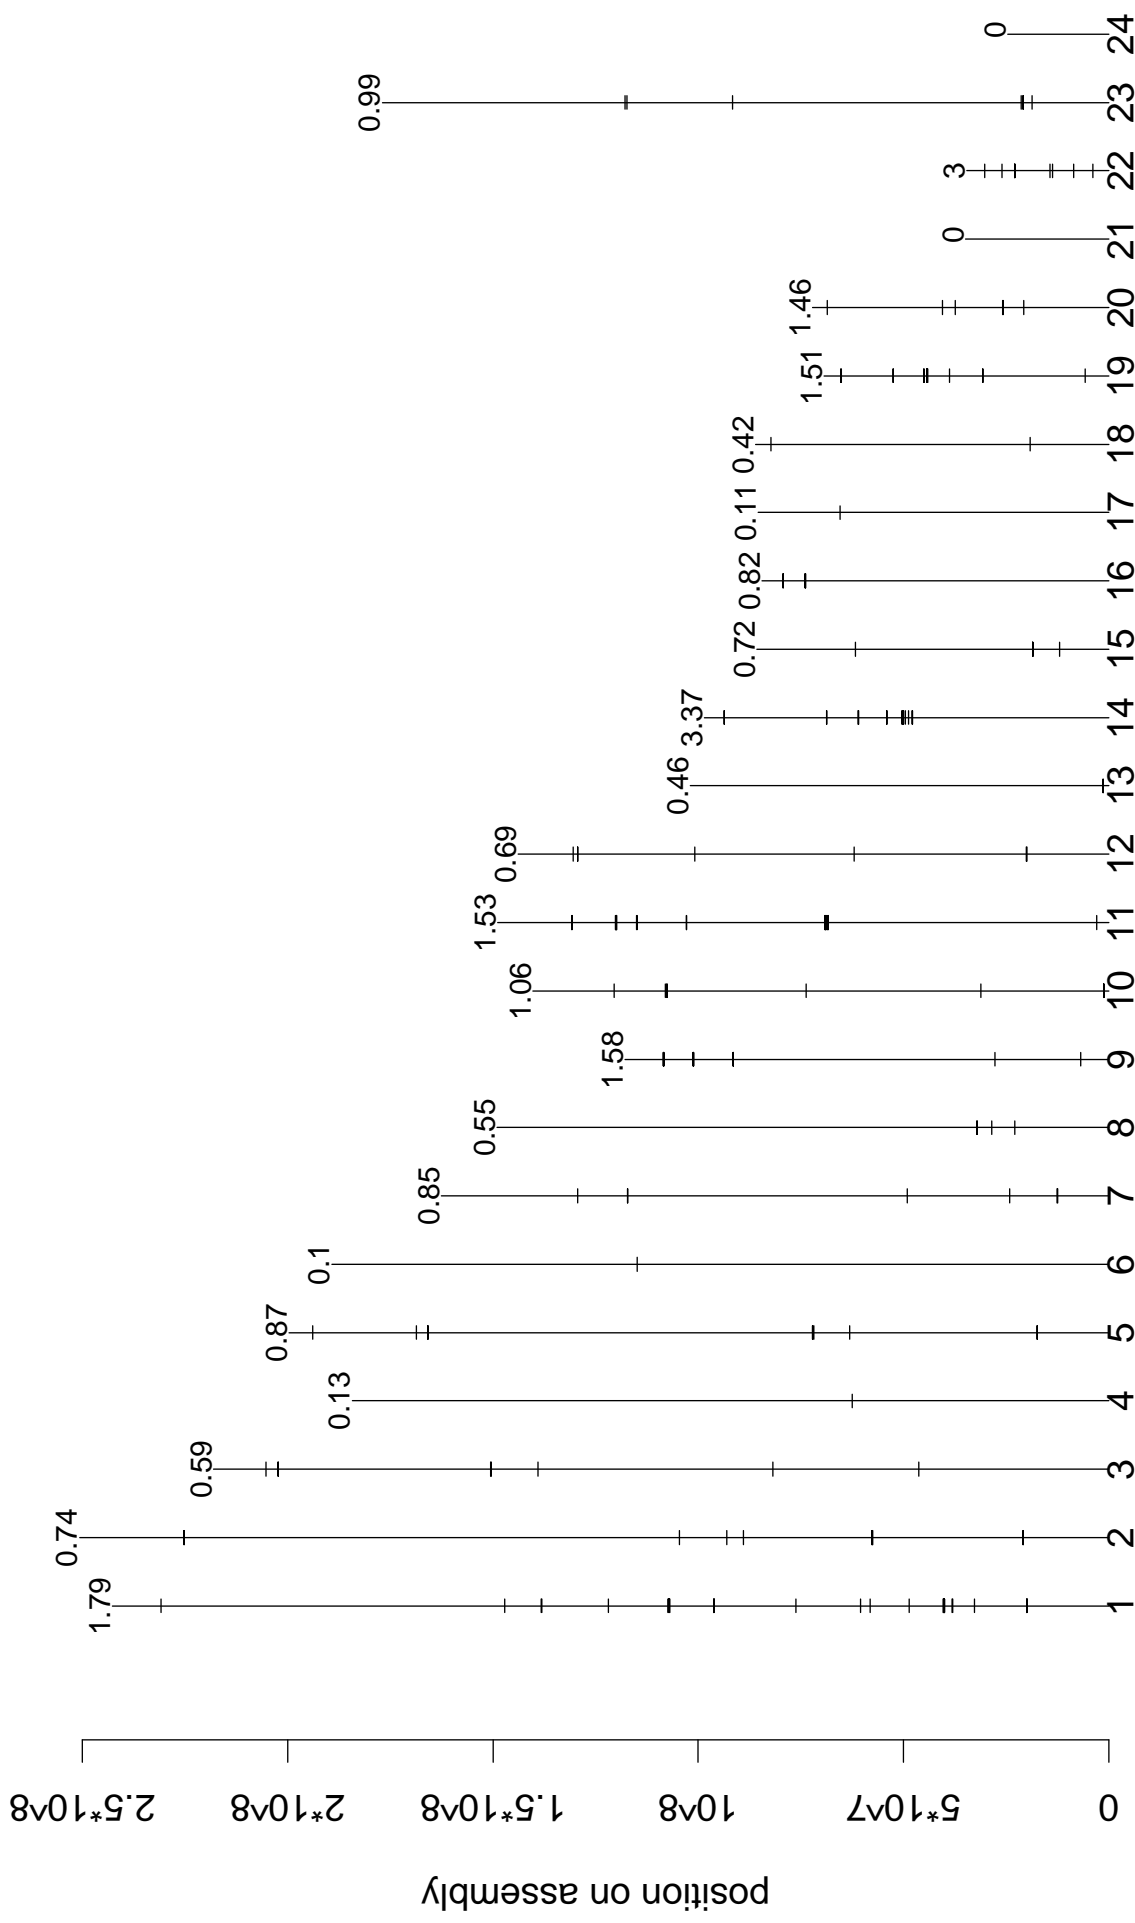

Chromosome



# Methylation

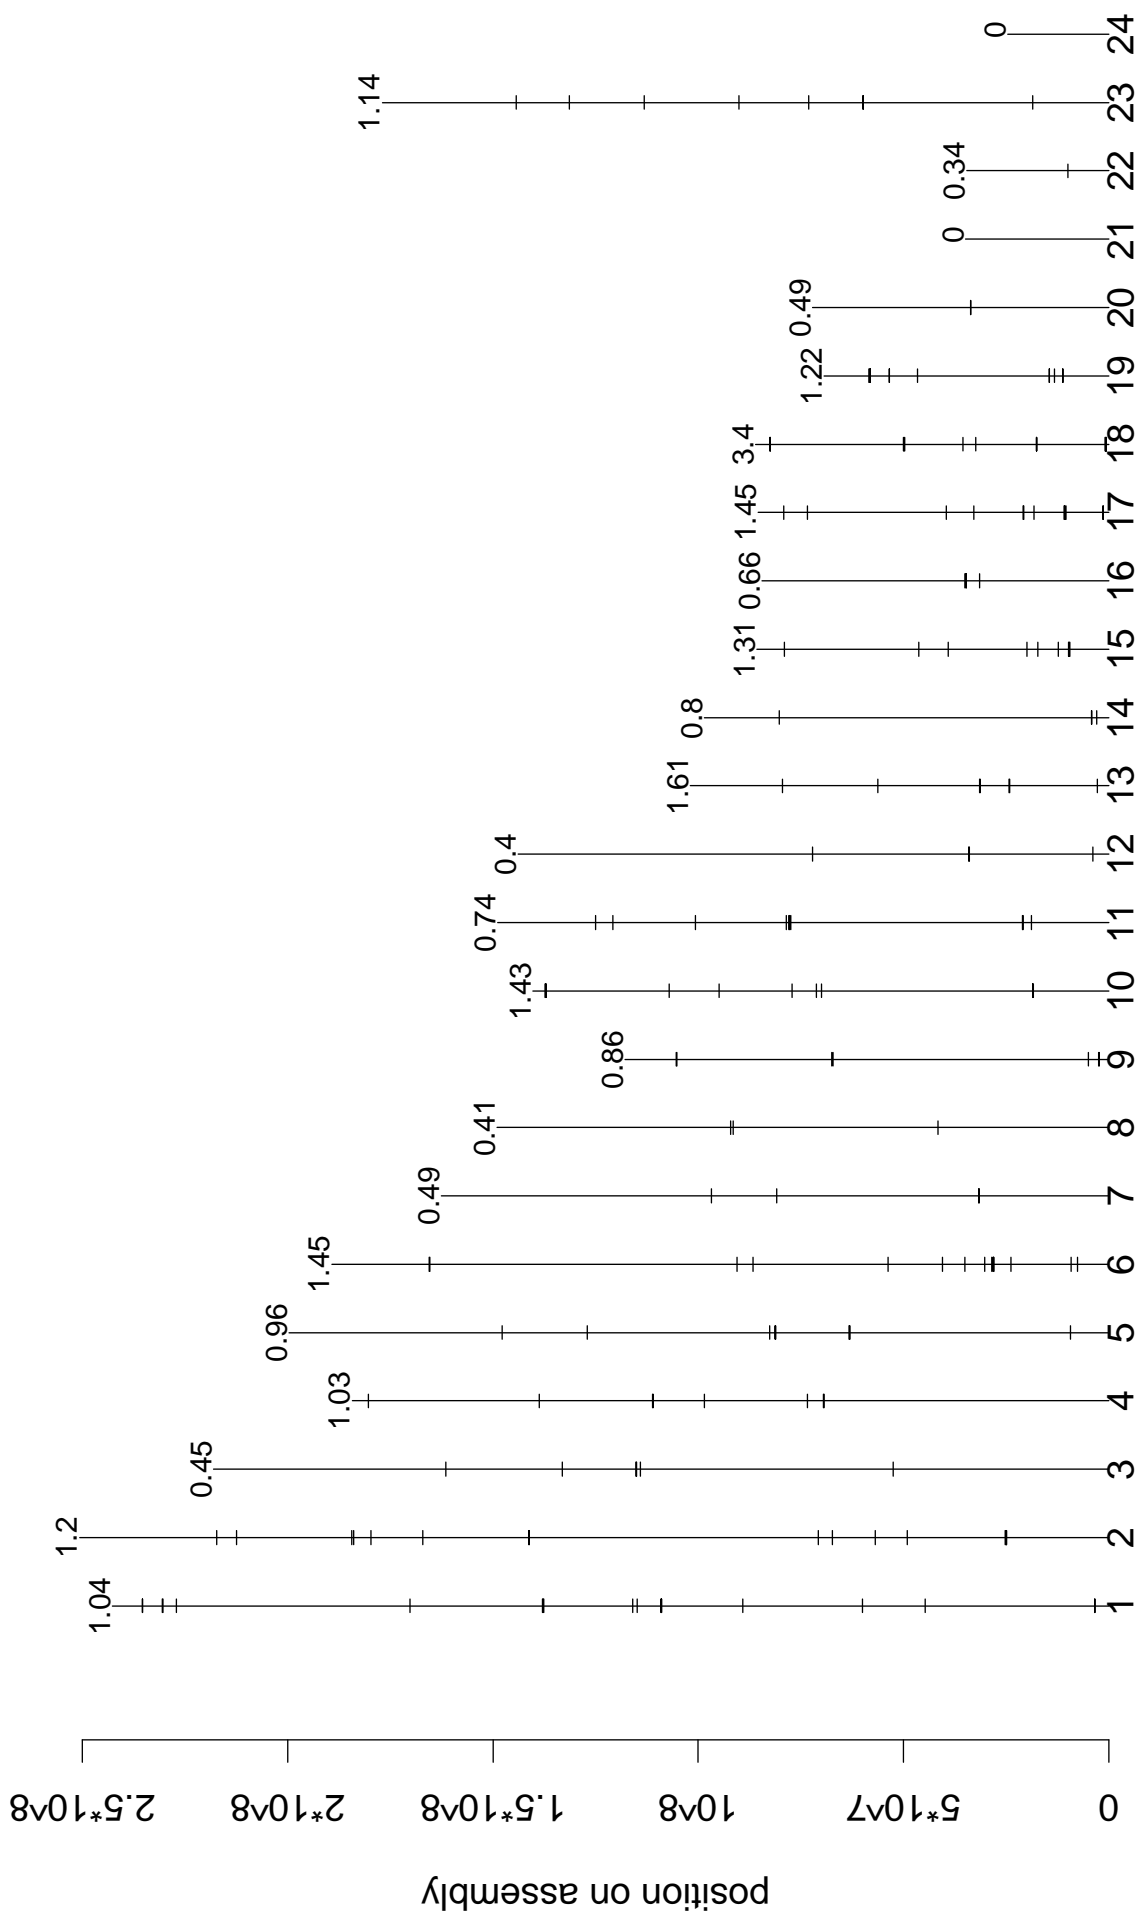

Chromosome

# Carbonyl transfer

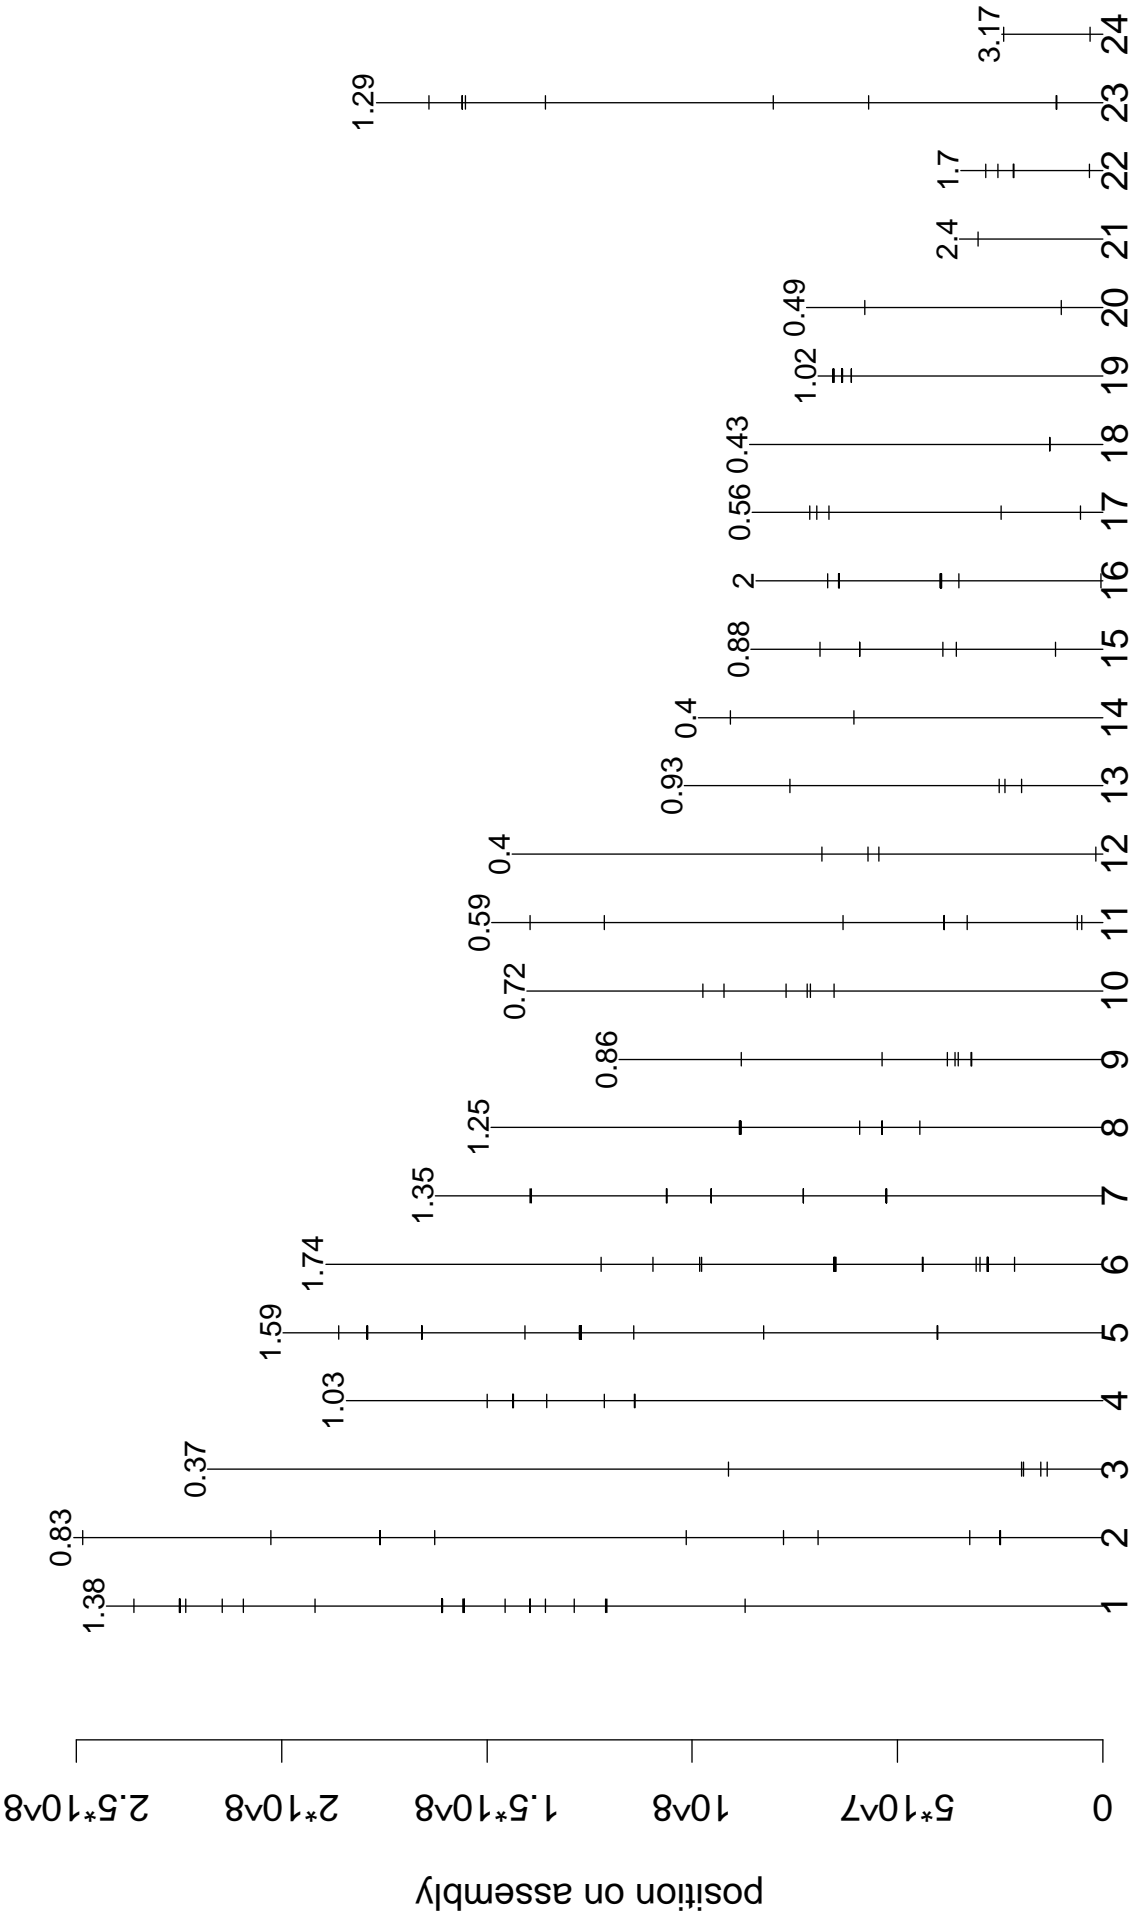

Chromosome

# Nucleotide and nucleic acid metabolism

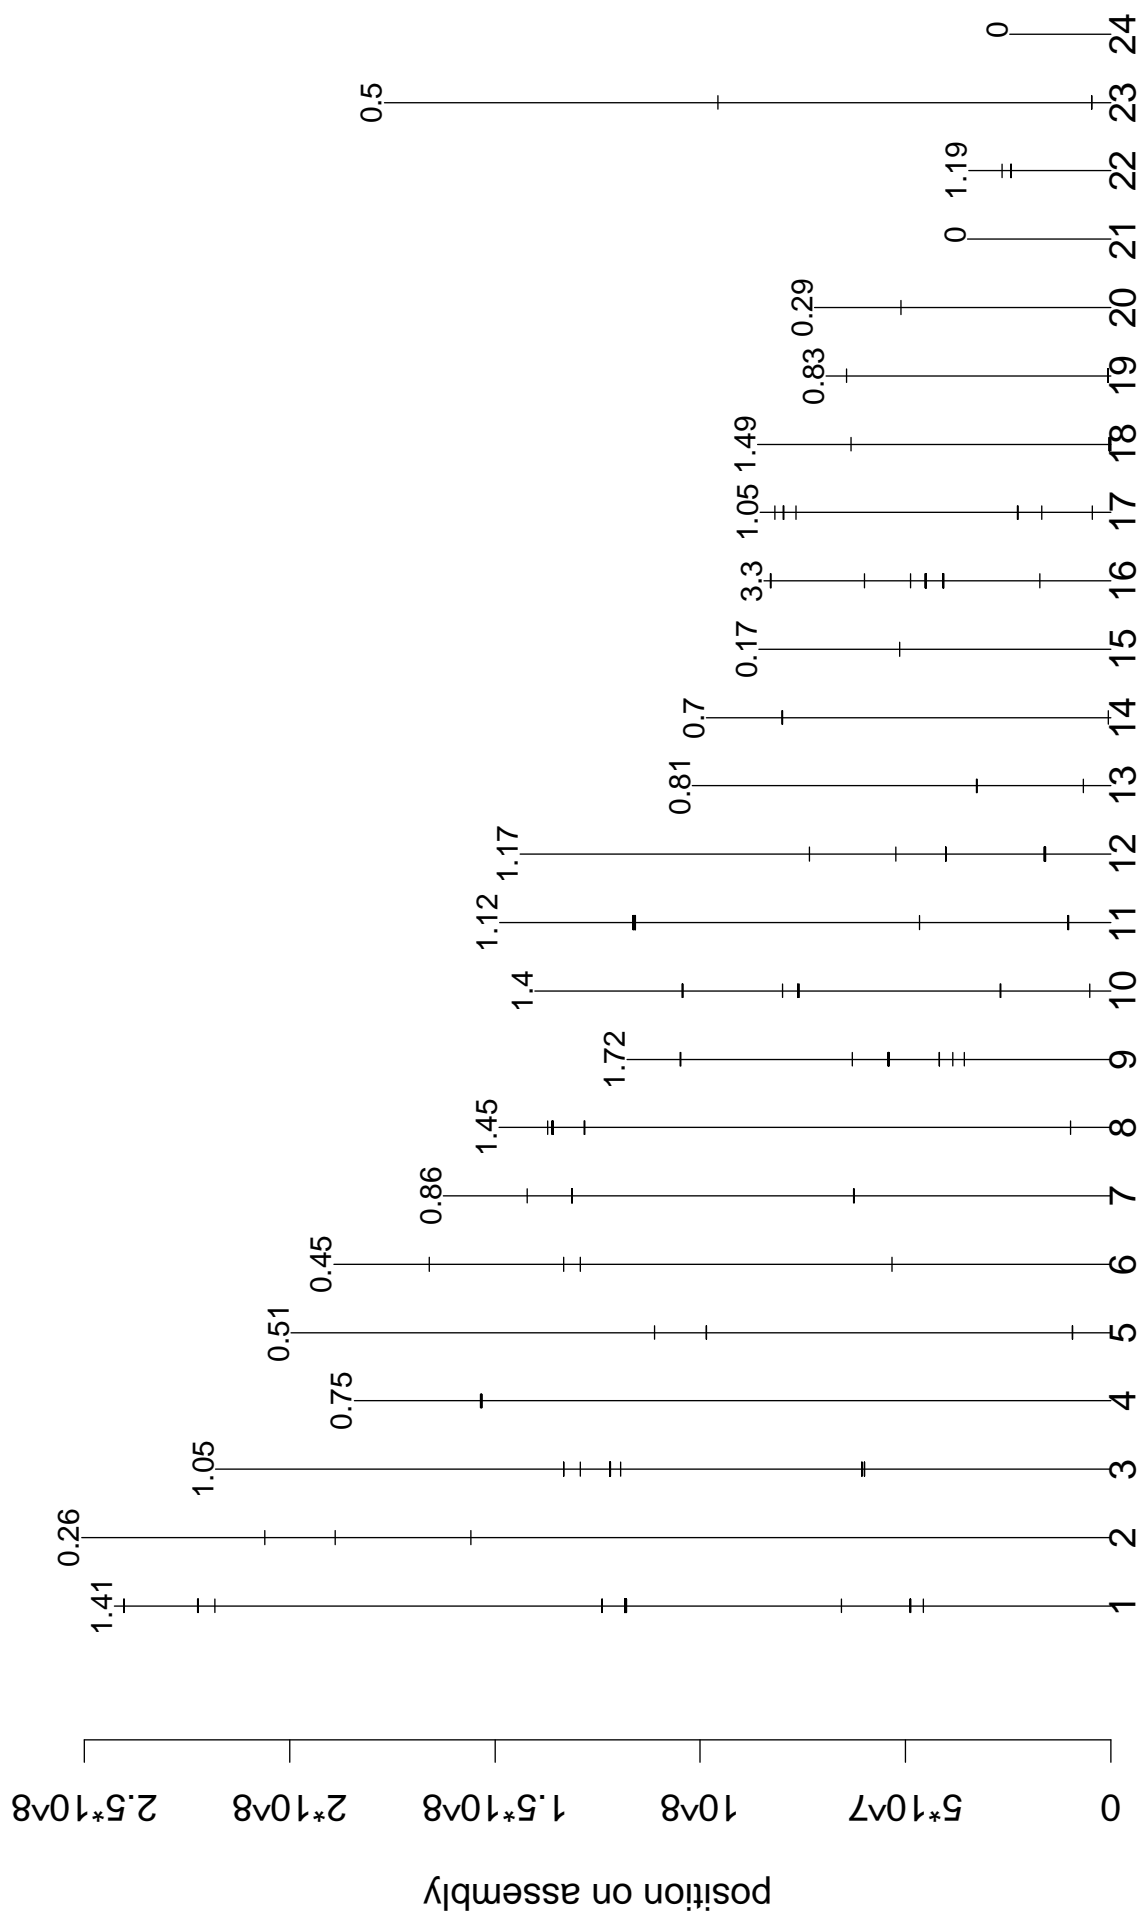

Chromosome

# Apoptosis

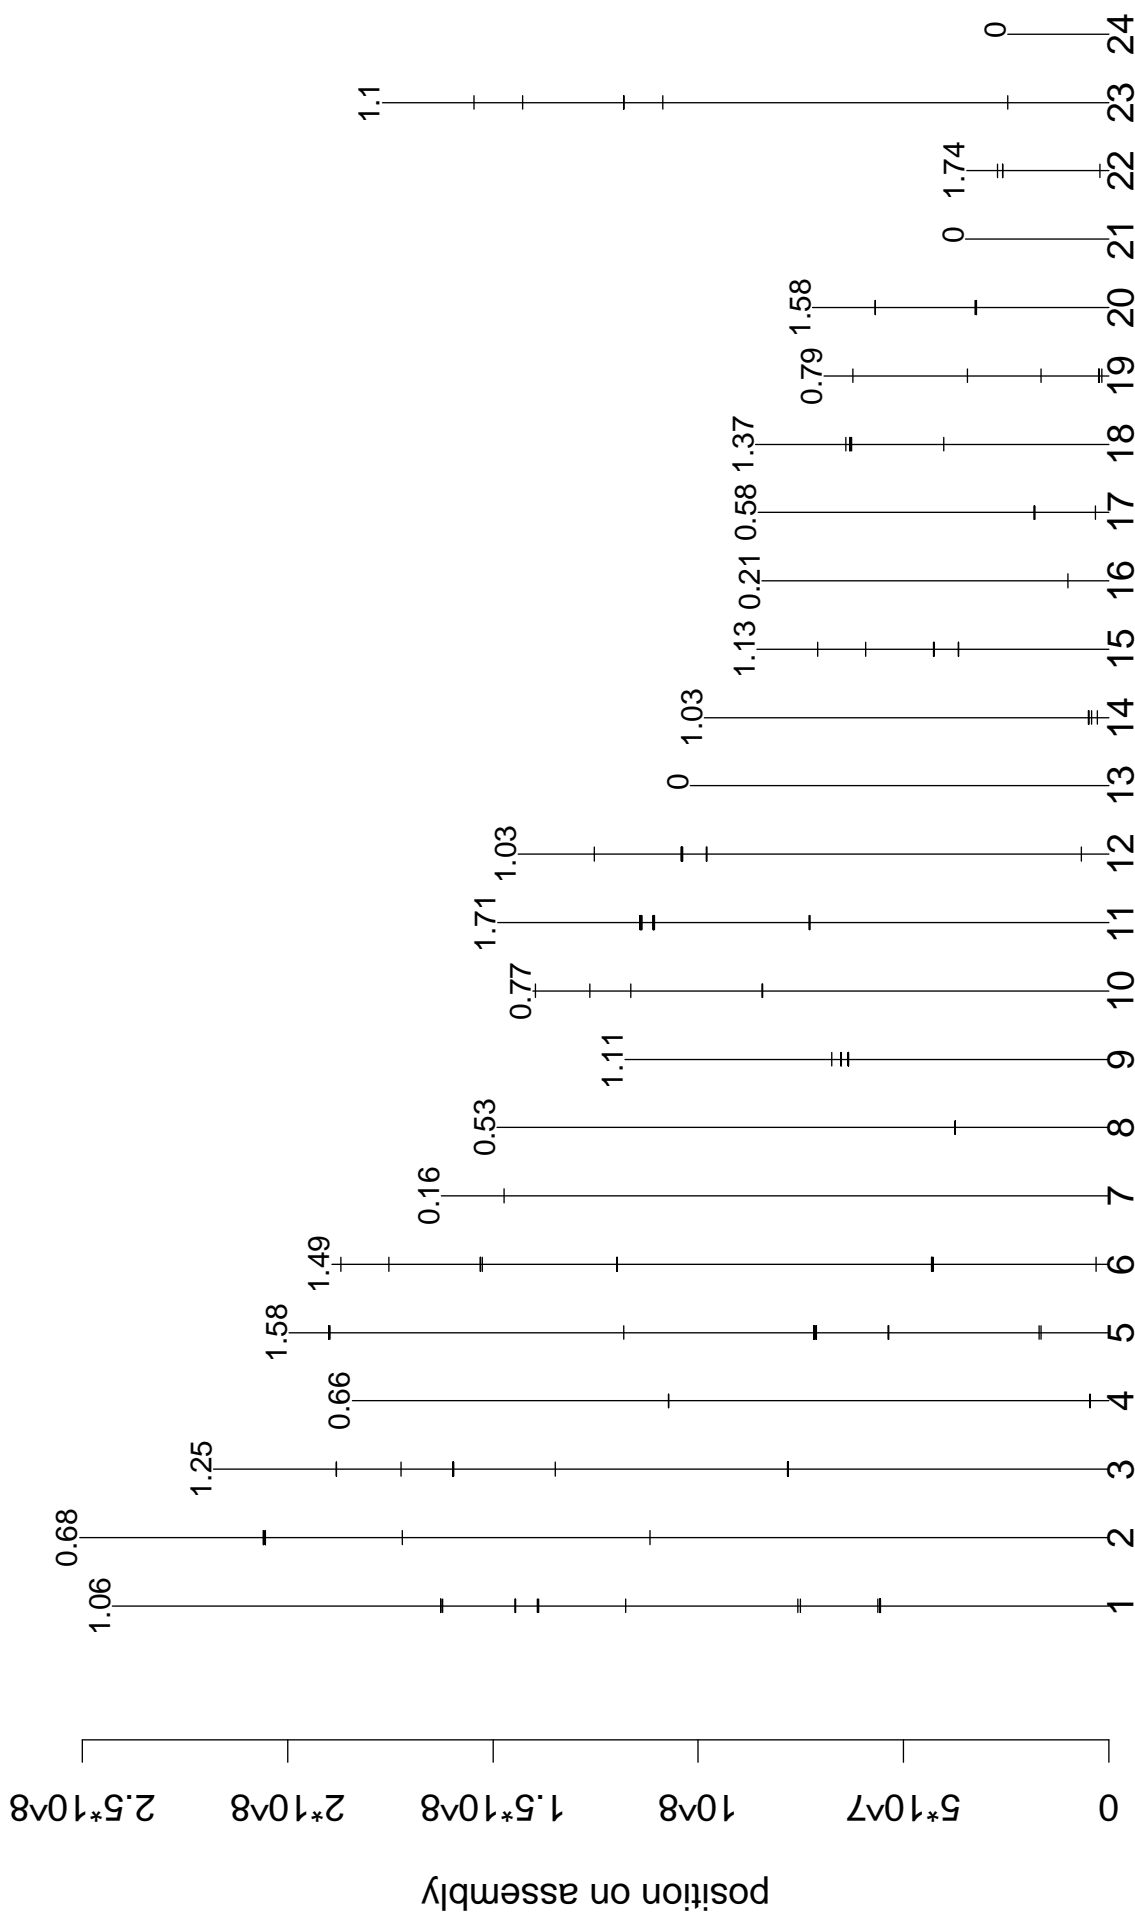

Chromosome

# Neurogenesis

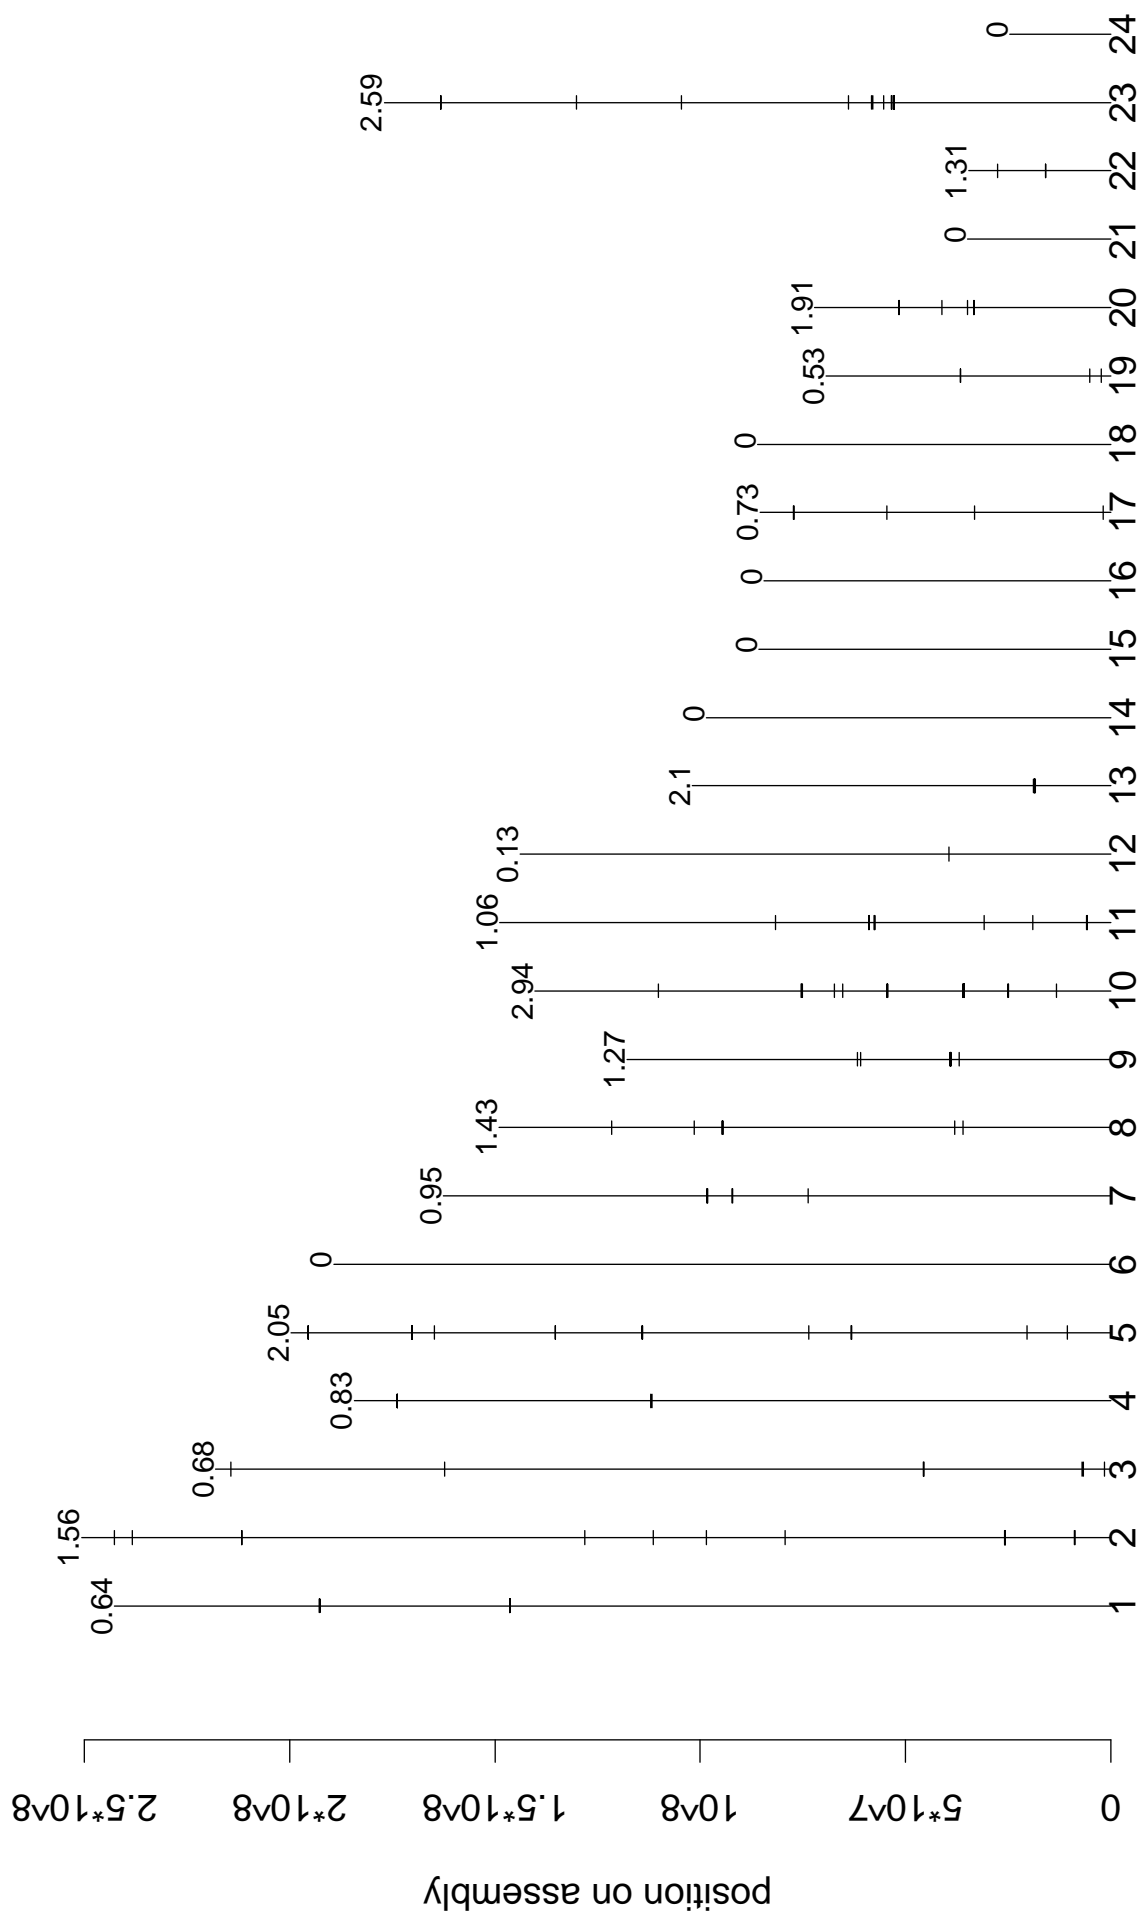

# Oxiredution

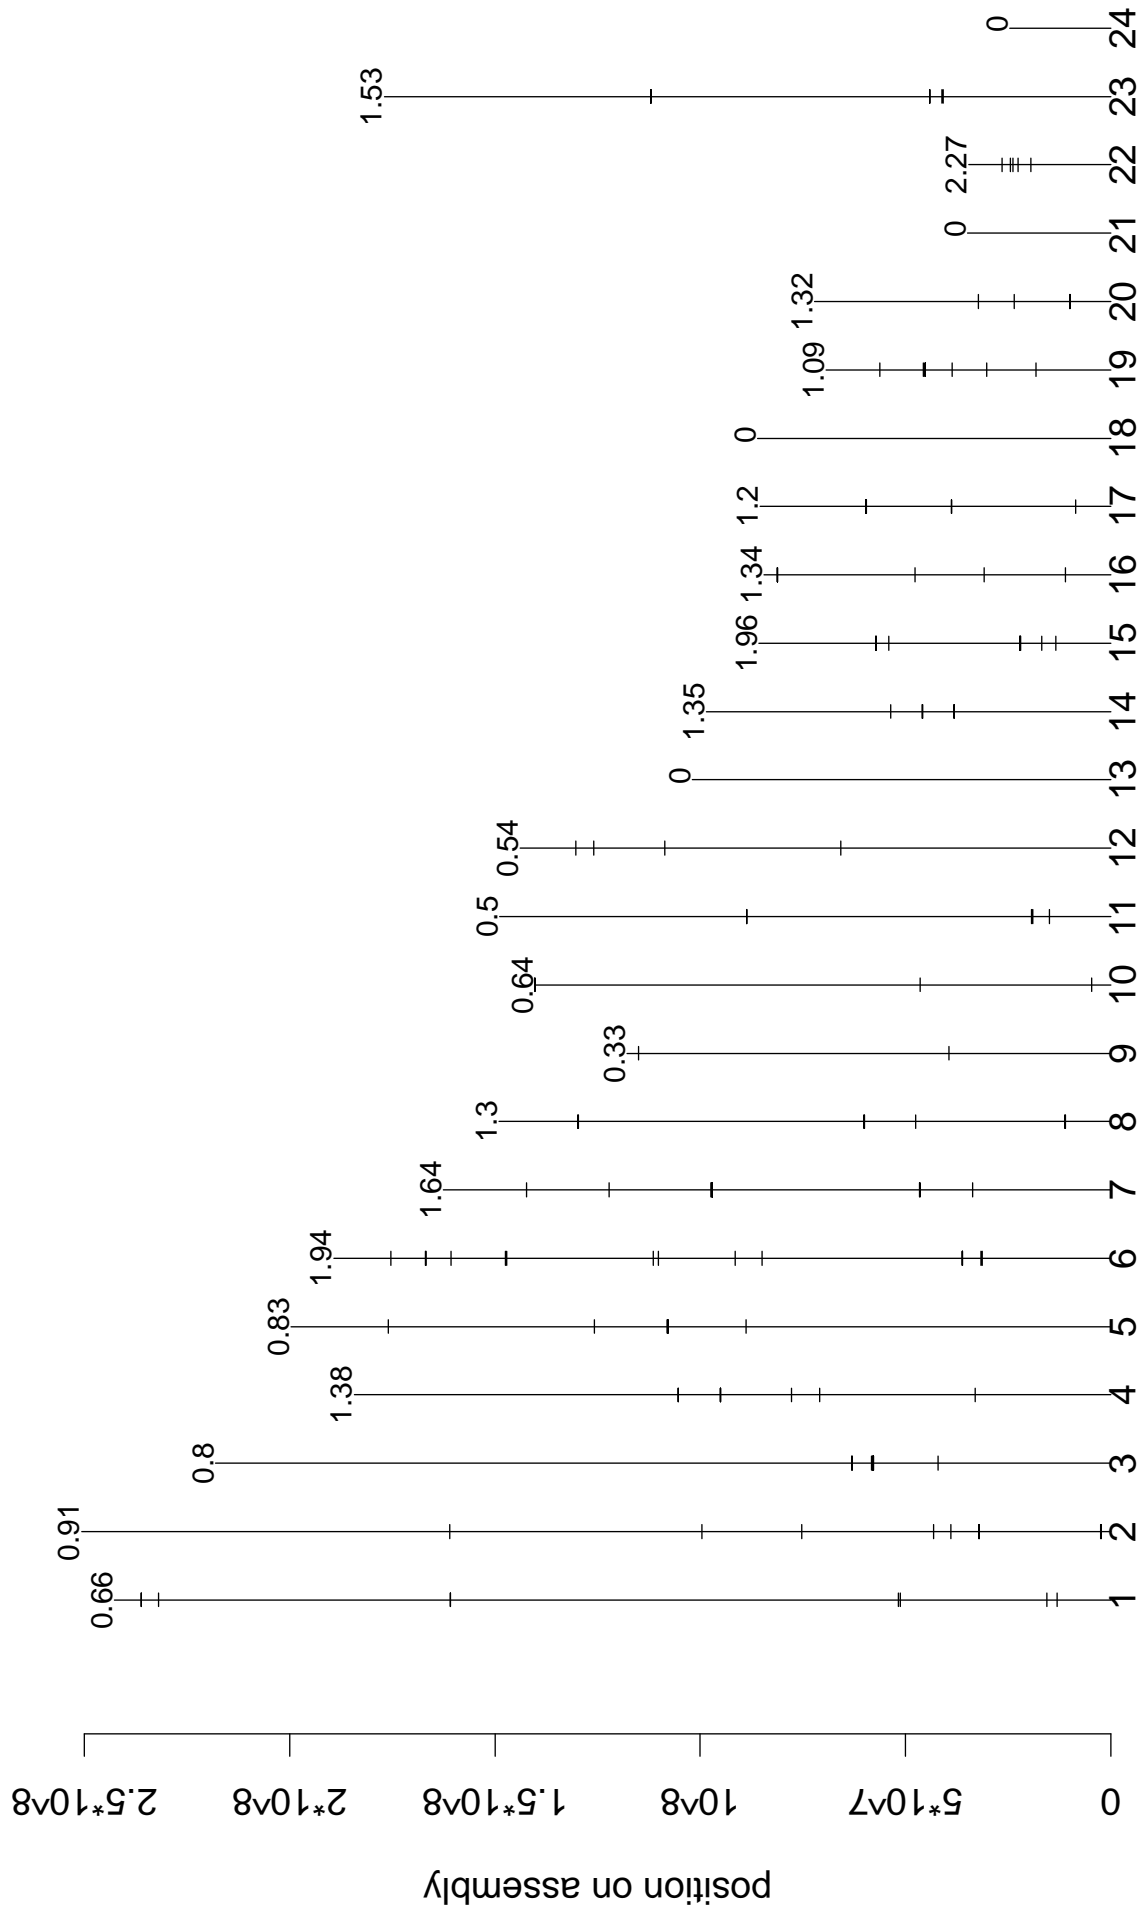

Chromosome

# RNA binding

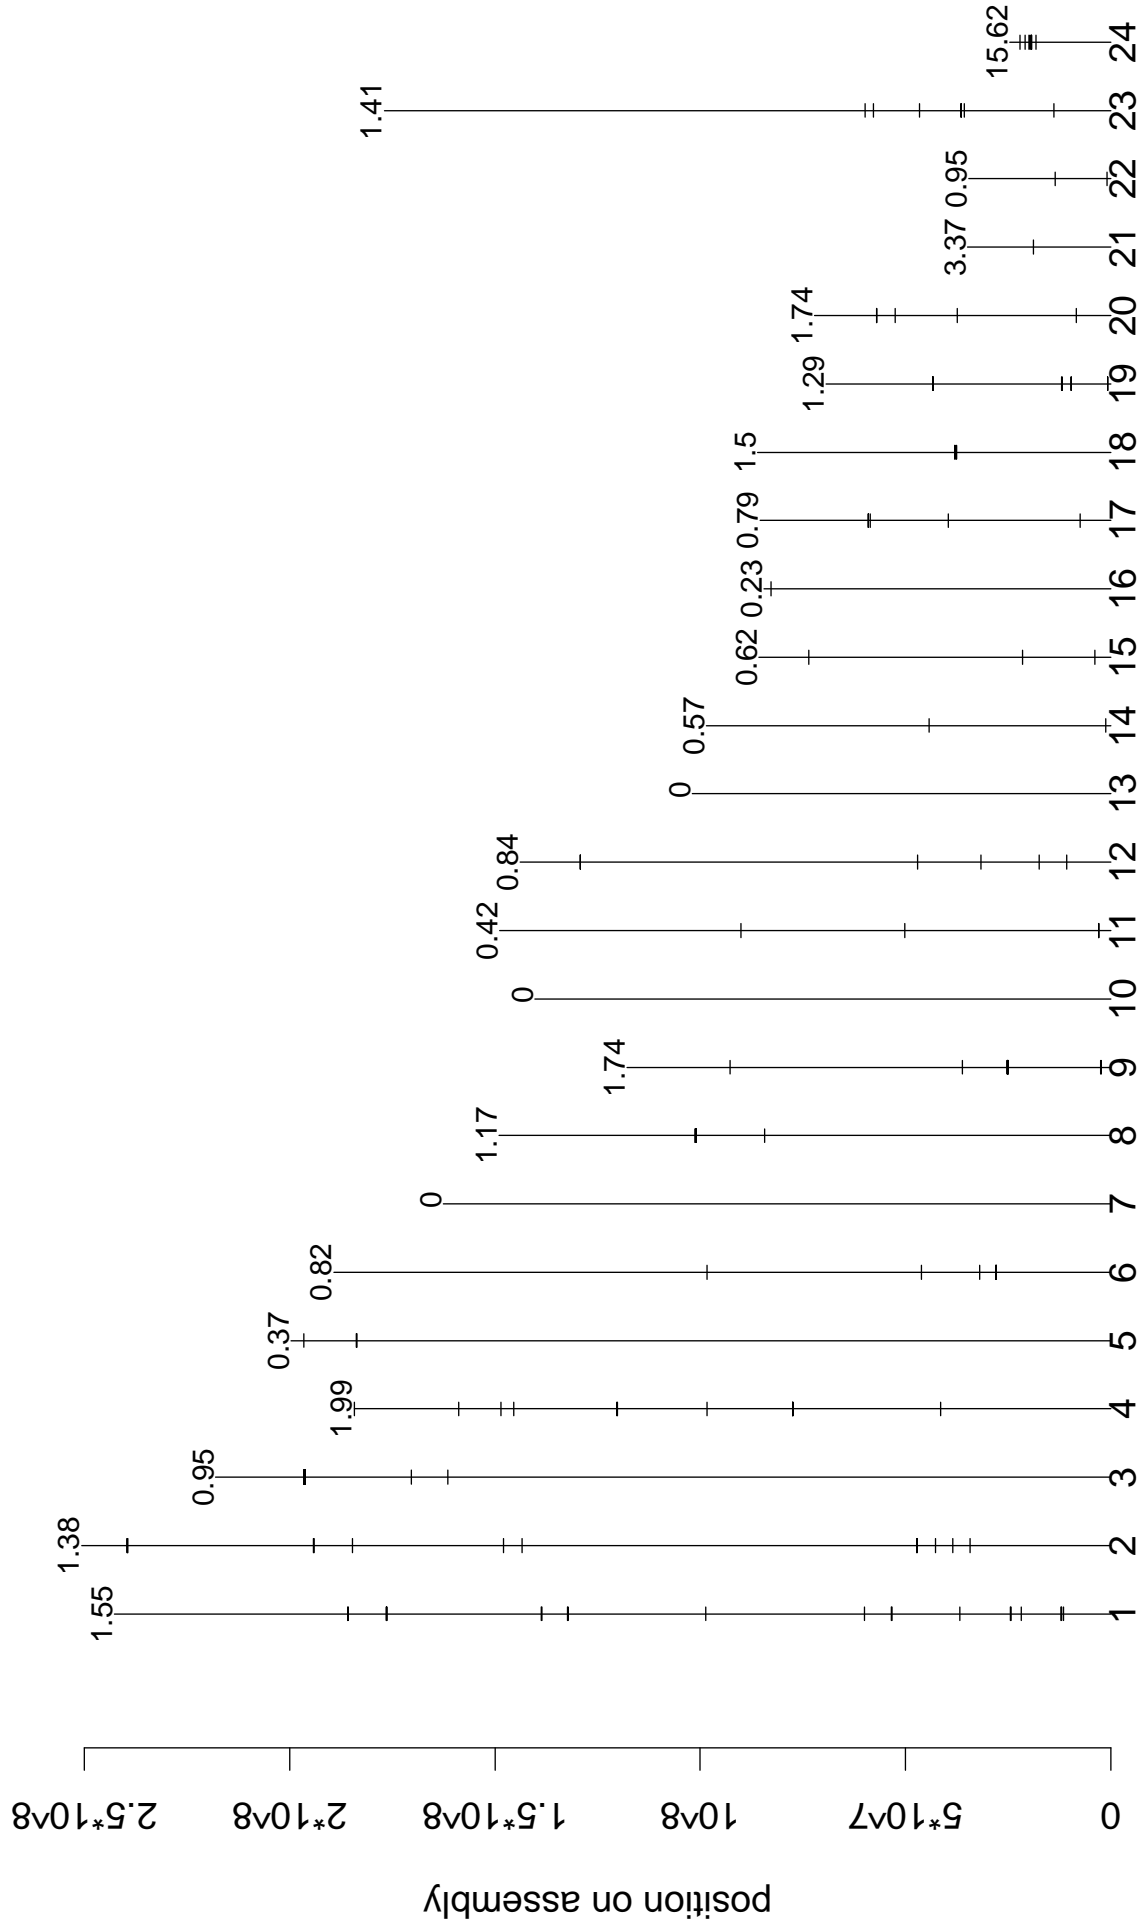

Chromosome

# Physiological process

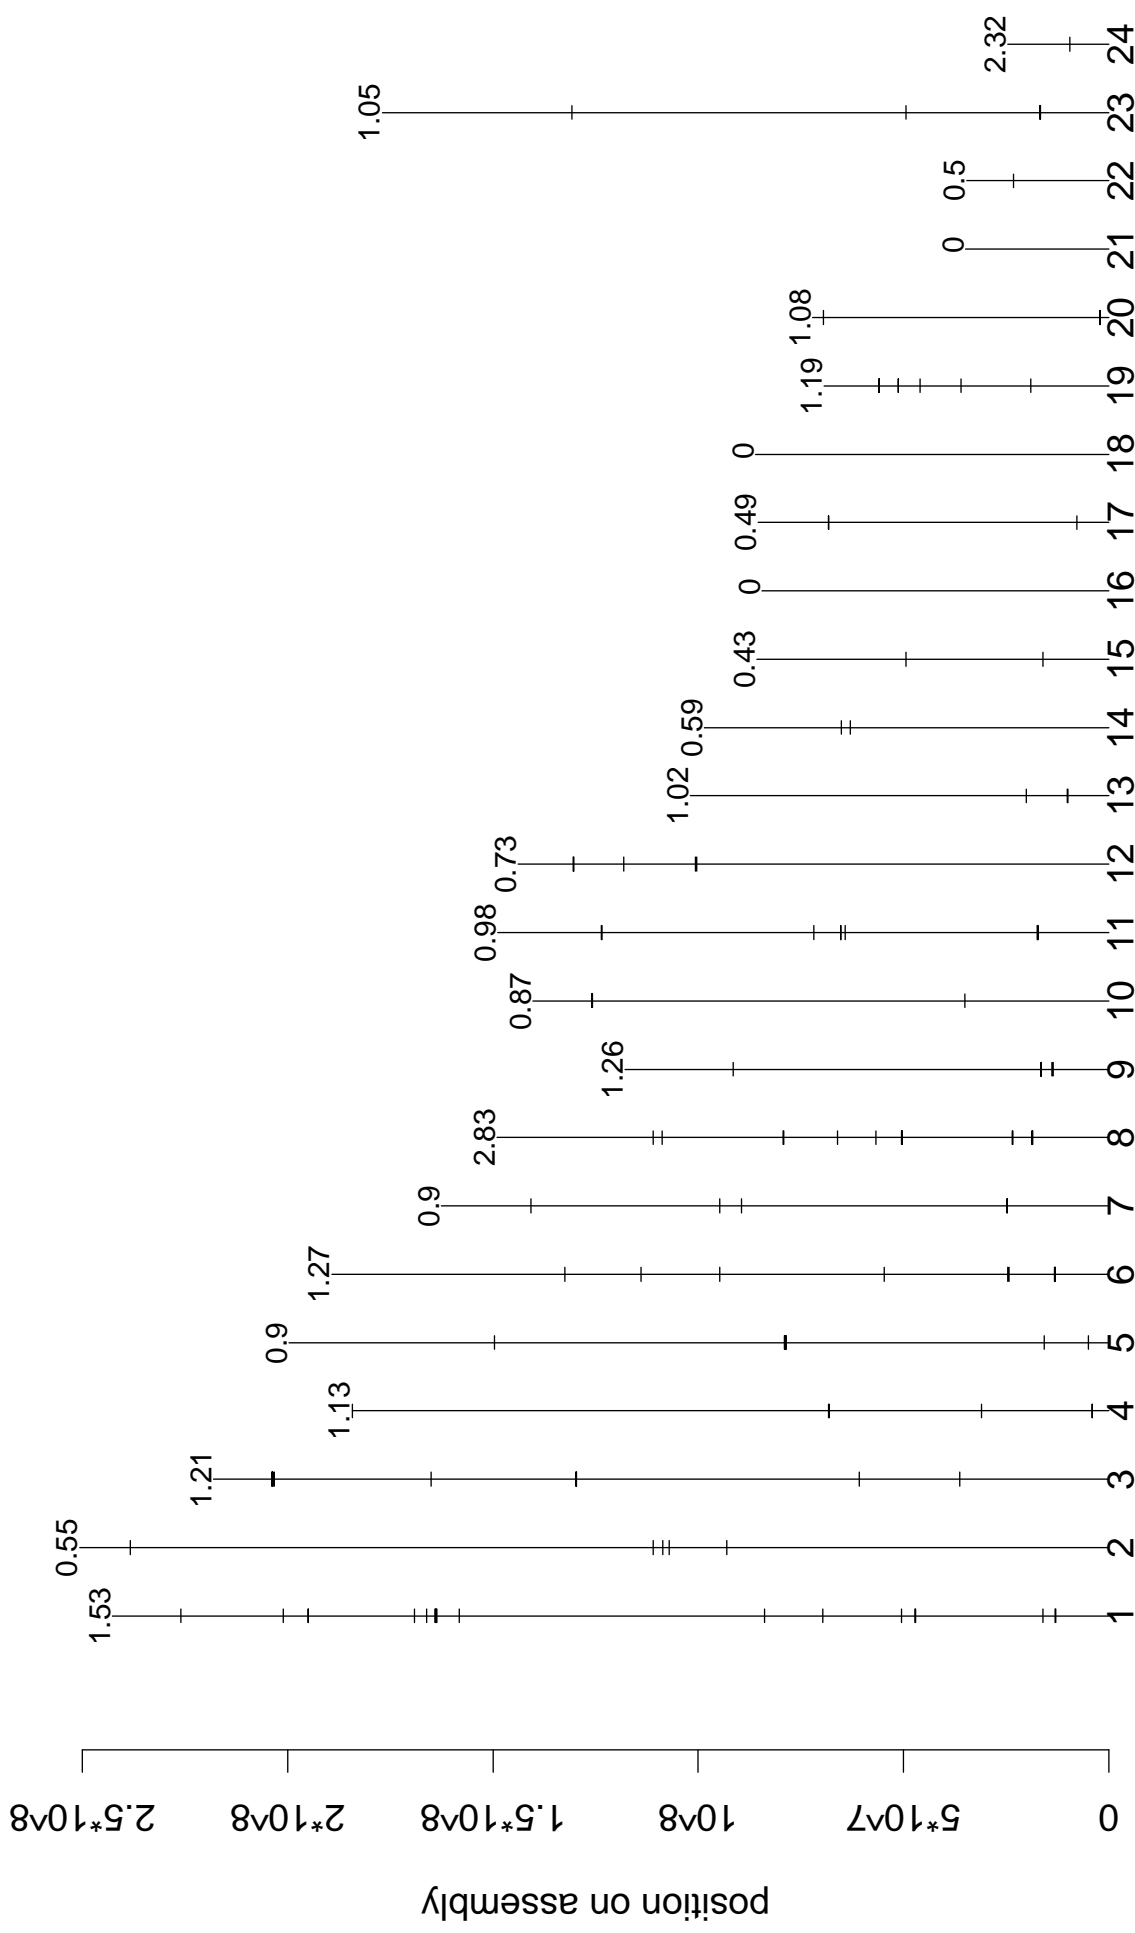



# Protein degradation

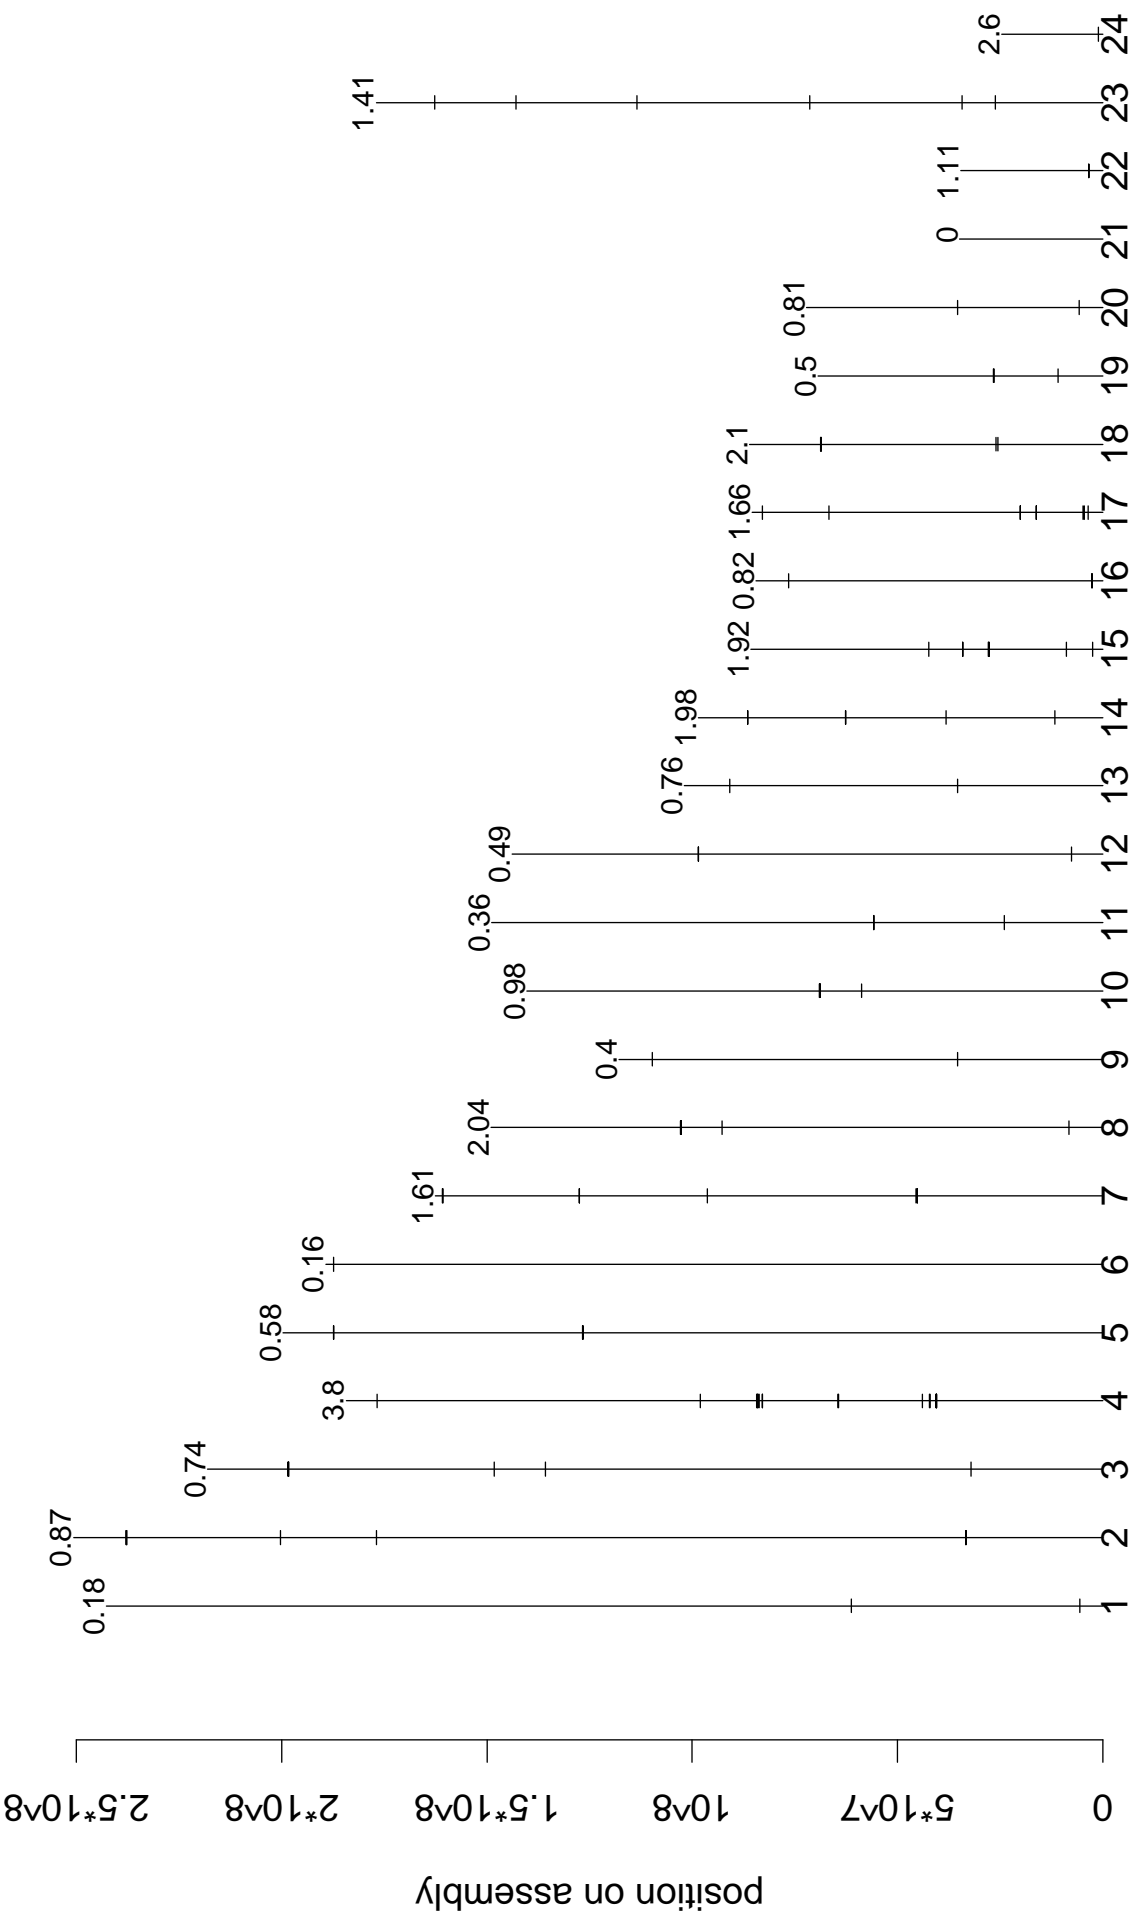

Chromosome

# DNA repair

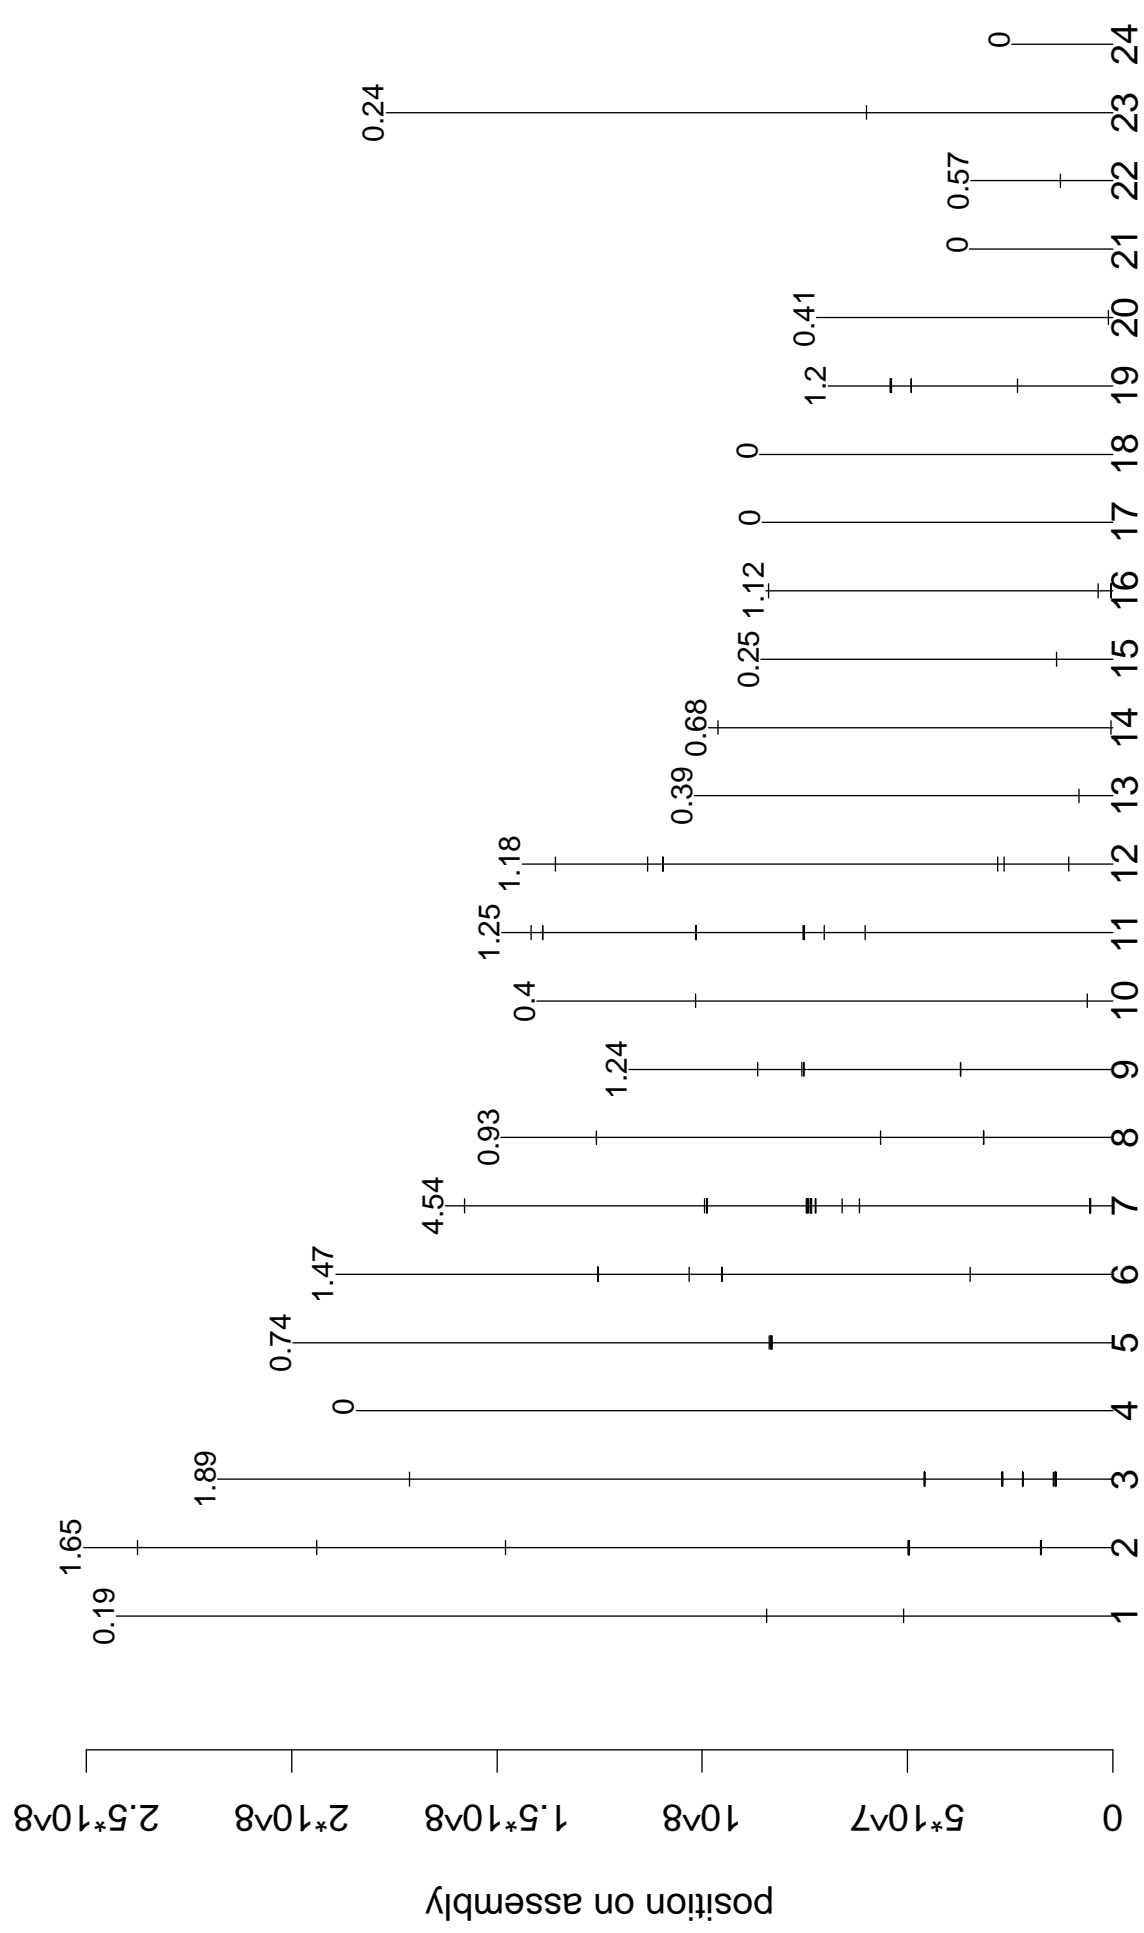

Chromosome

# Oncogene

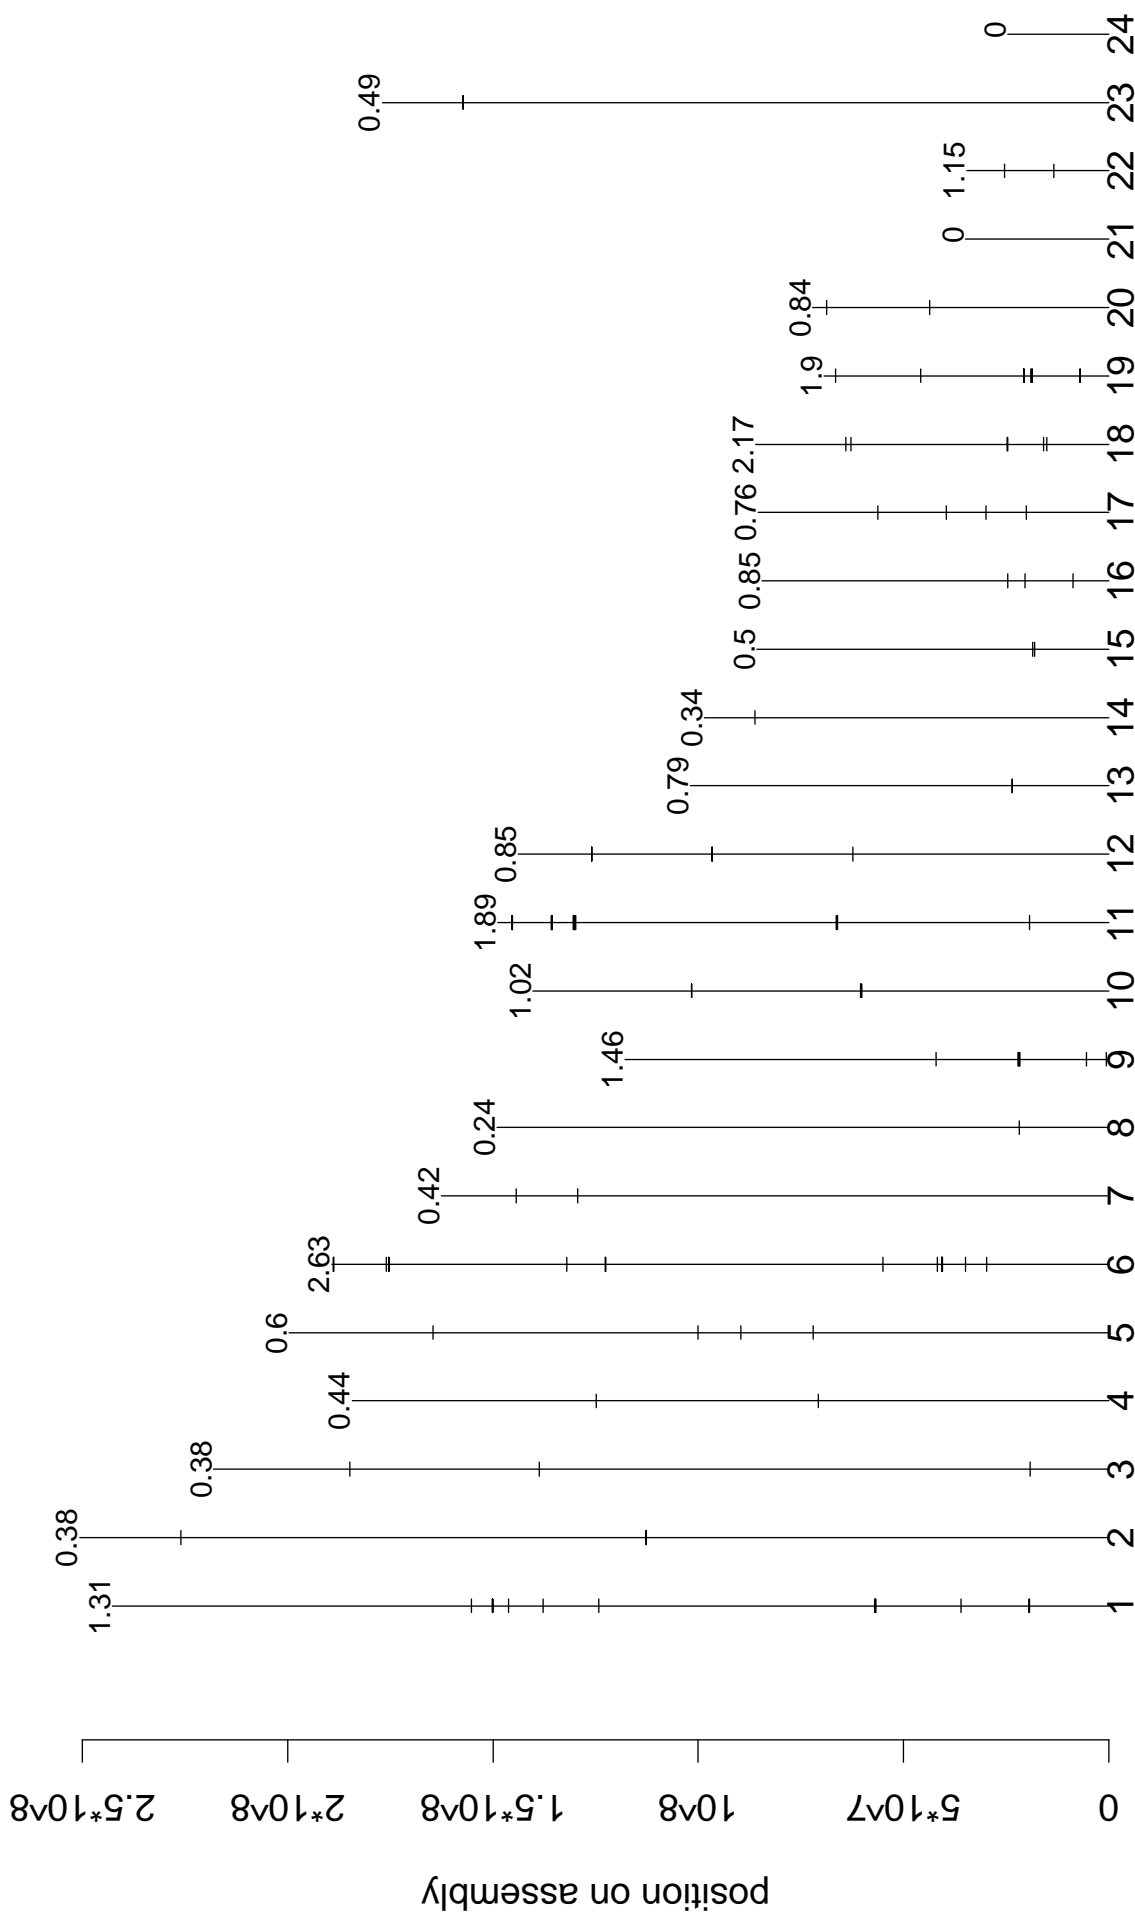

# G protein-linked receptor

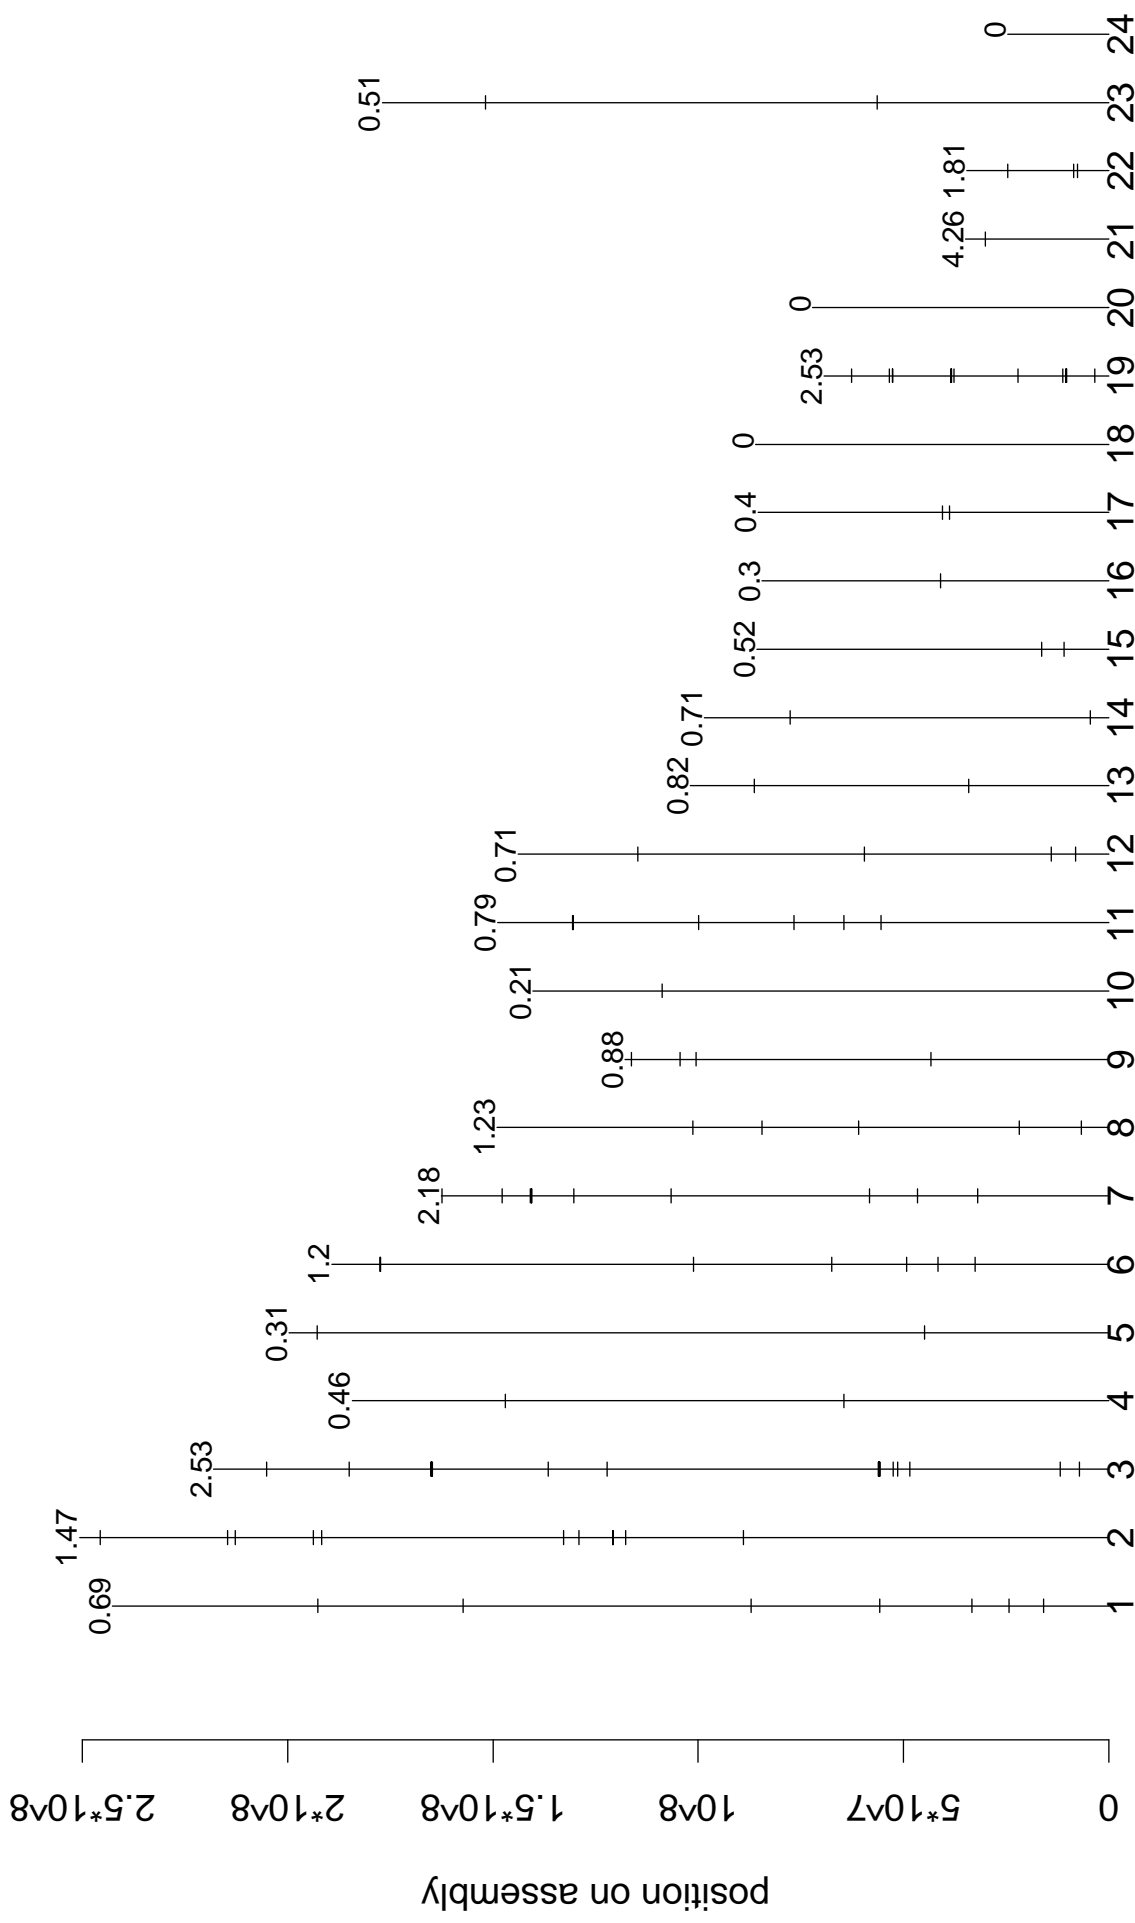

Chromosome

# Defense/immunity

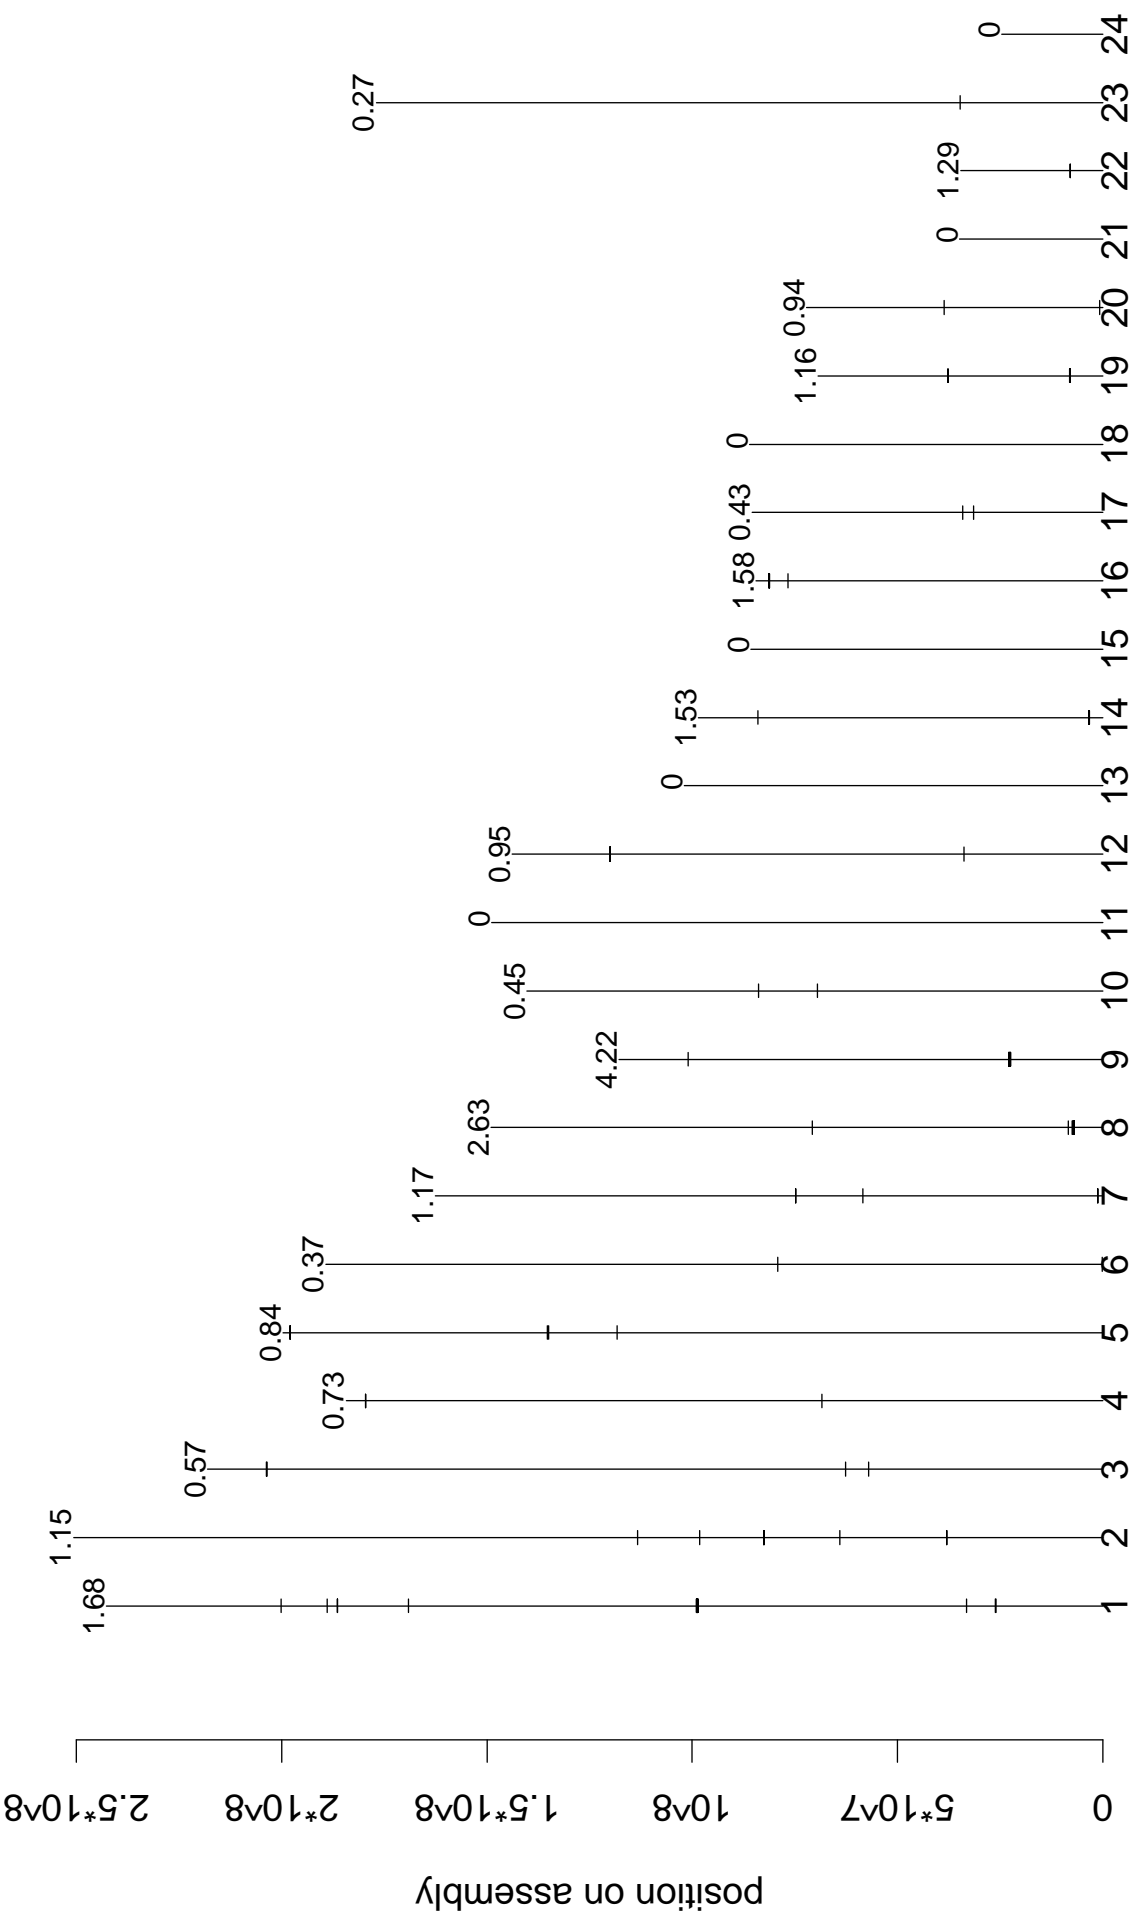

Chromosome

# Proteolysis and peptidolysis

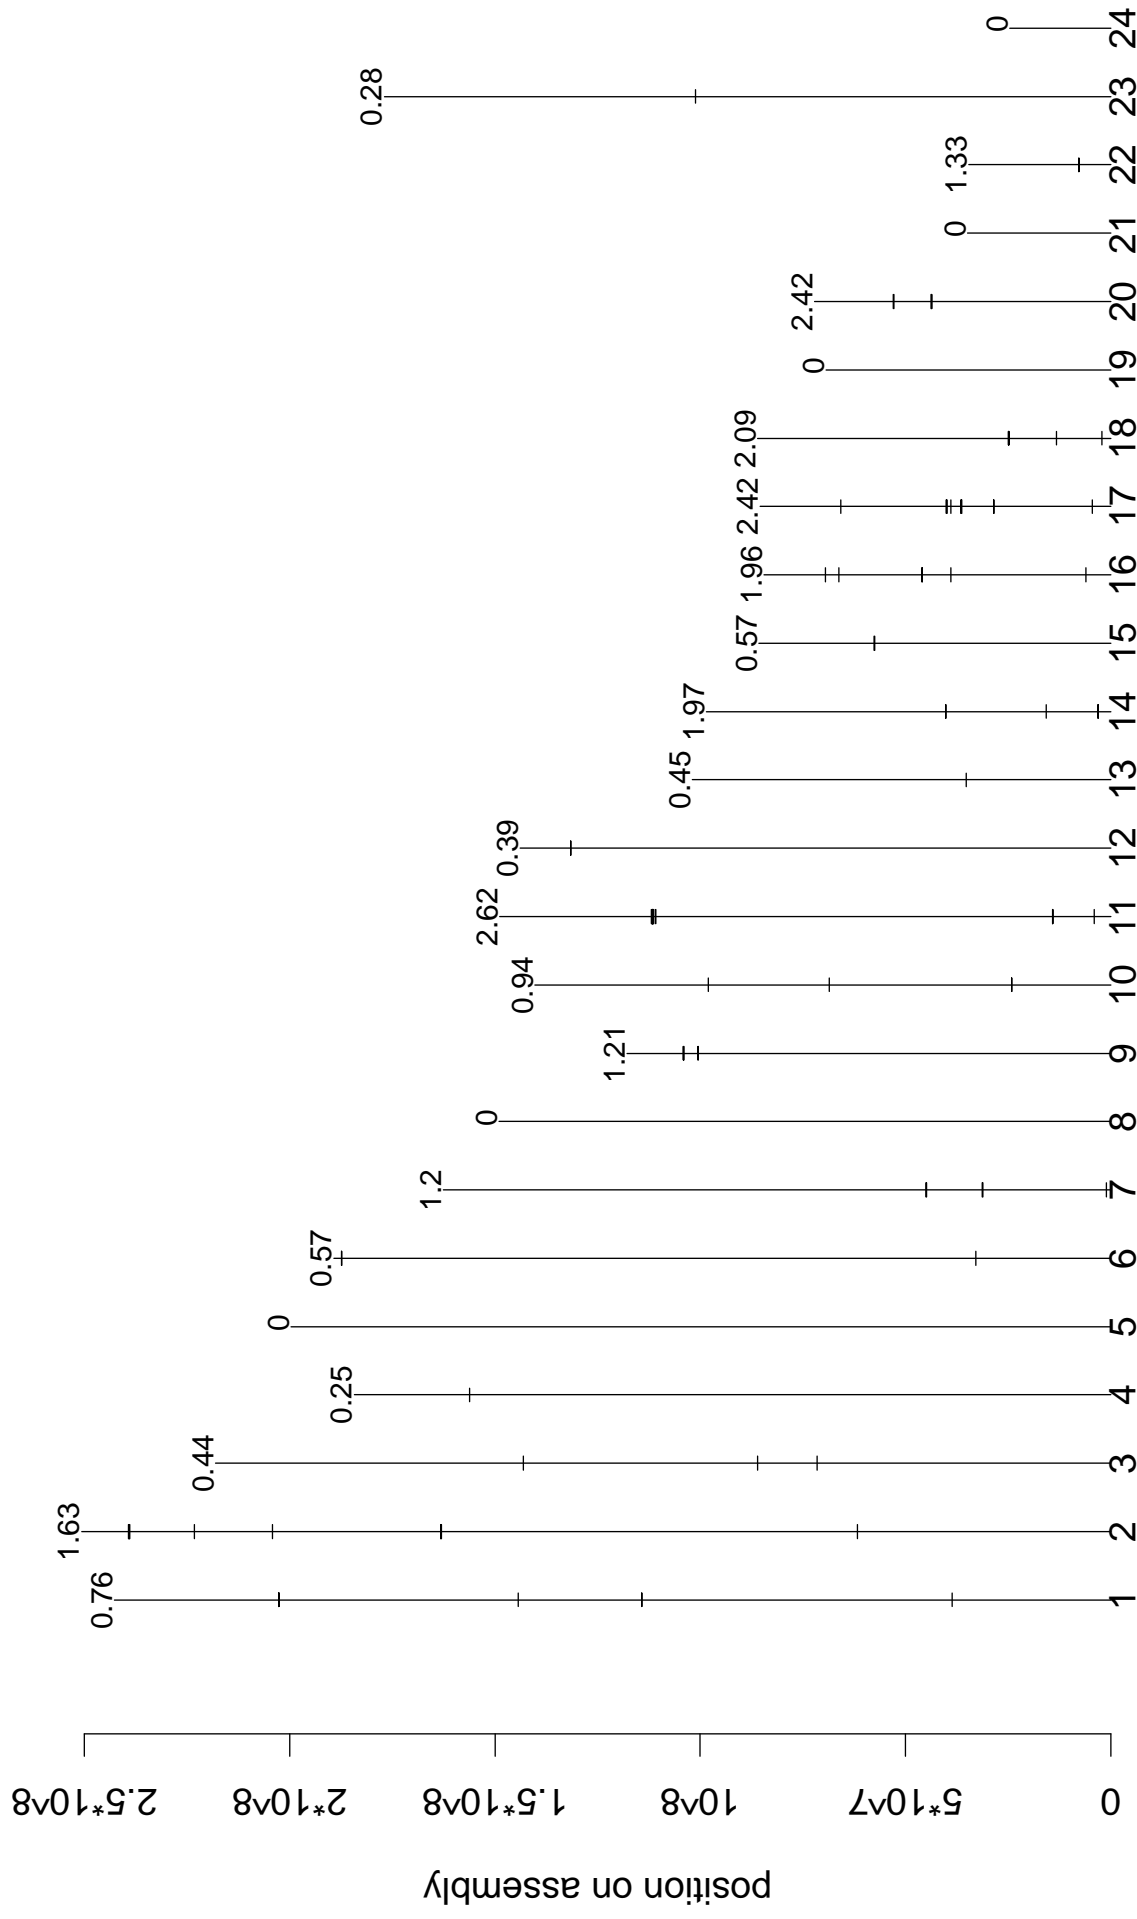

Chromosome

# Growth factor

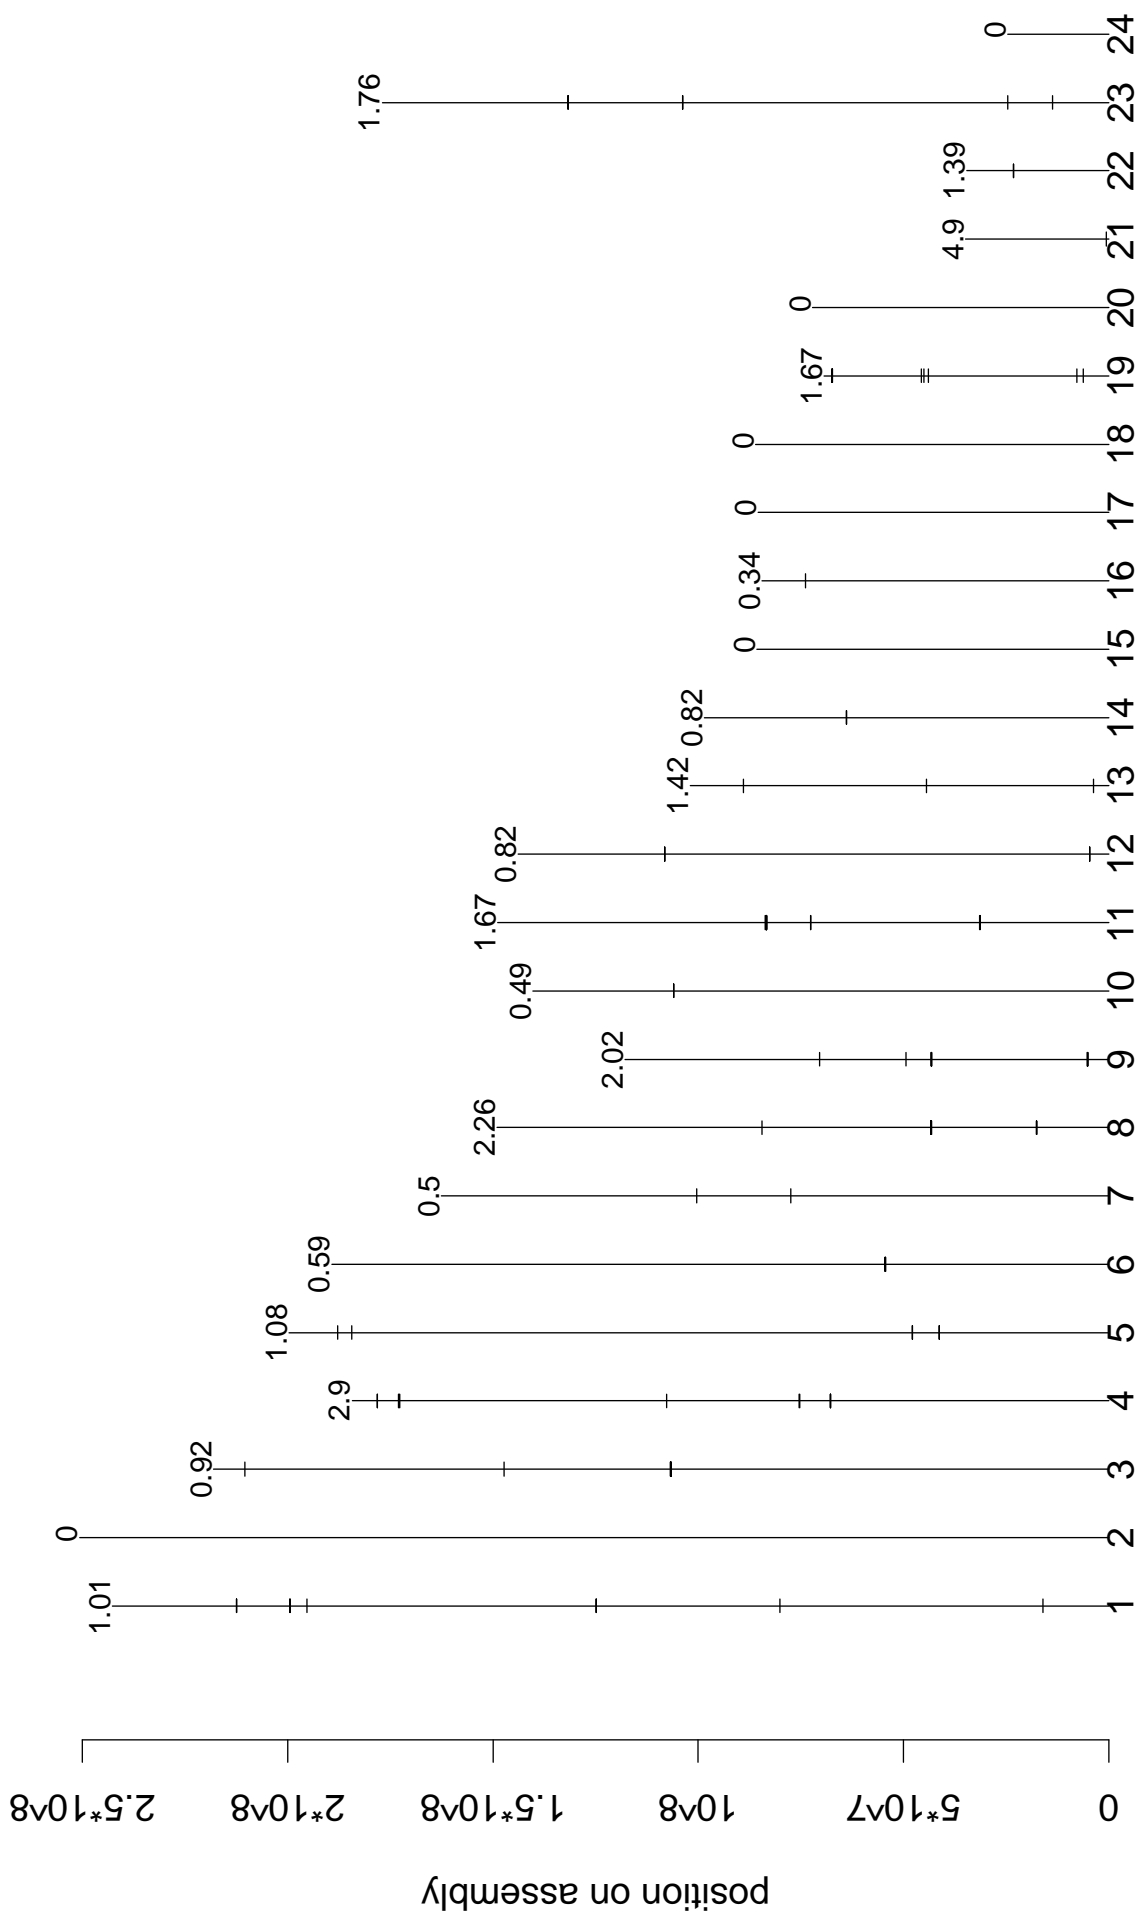

# Protease inhibitor

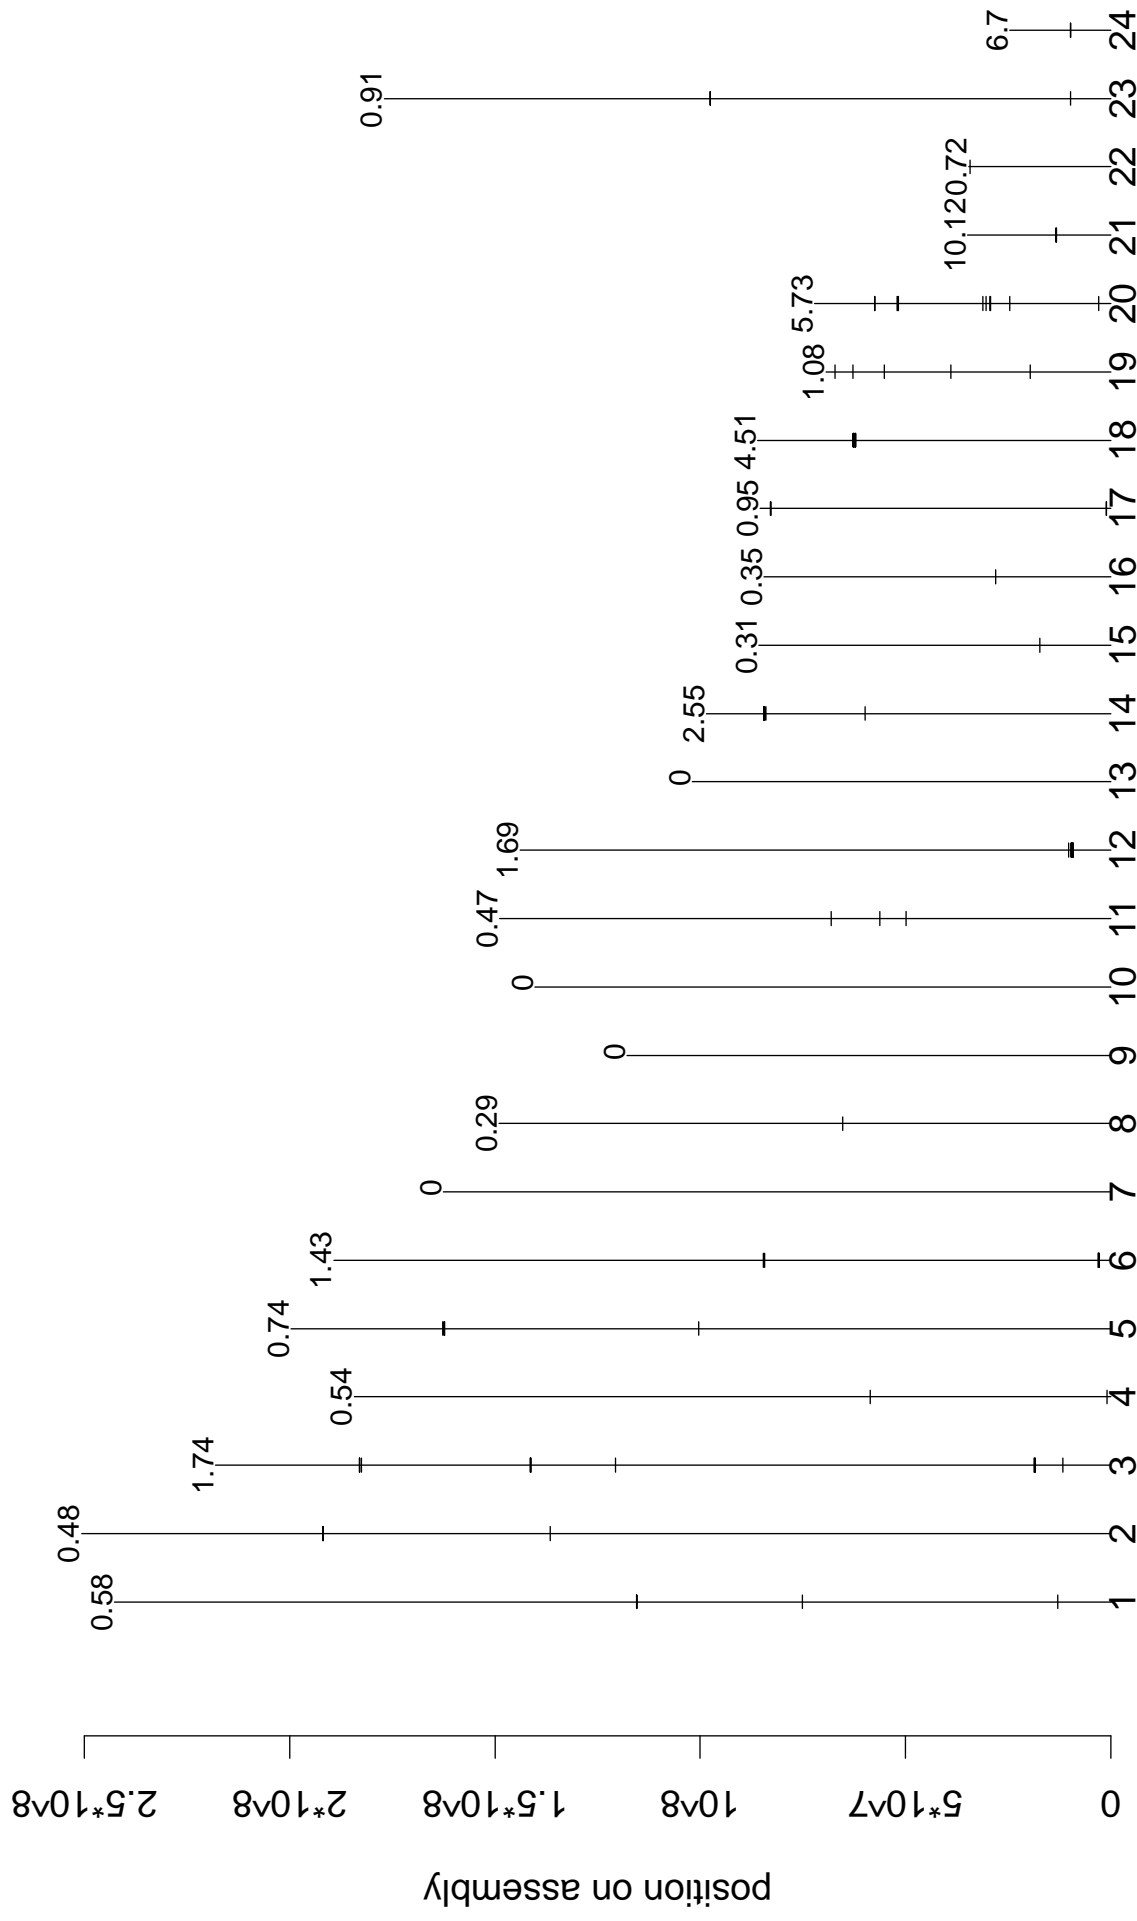

Chromosome



# Coenzymes and prosthetic group metabolism

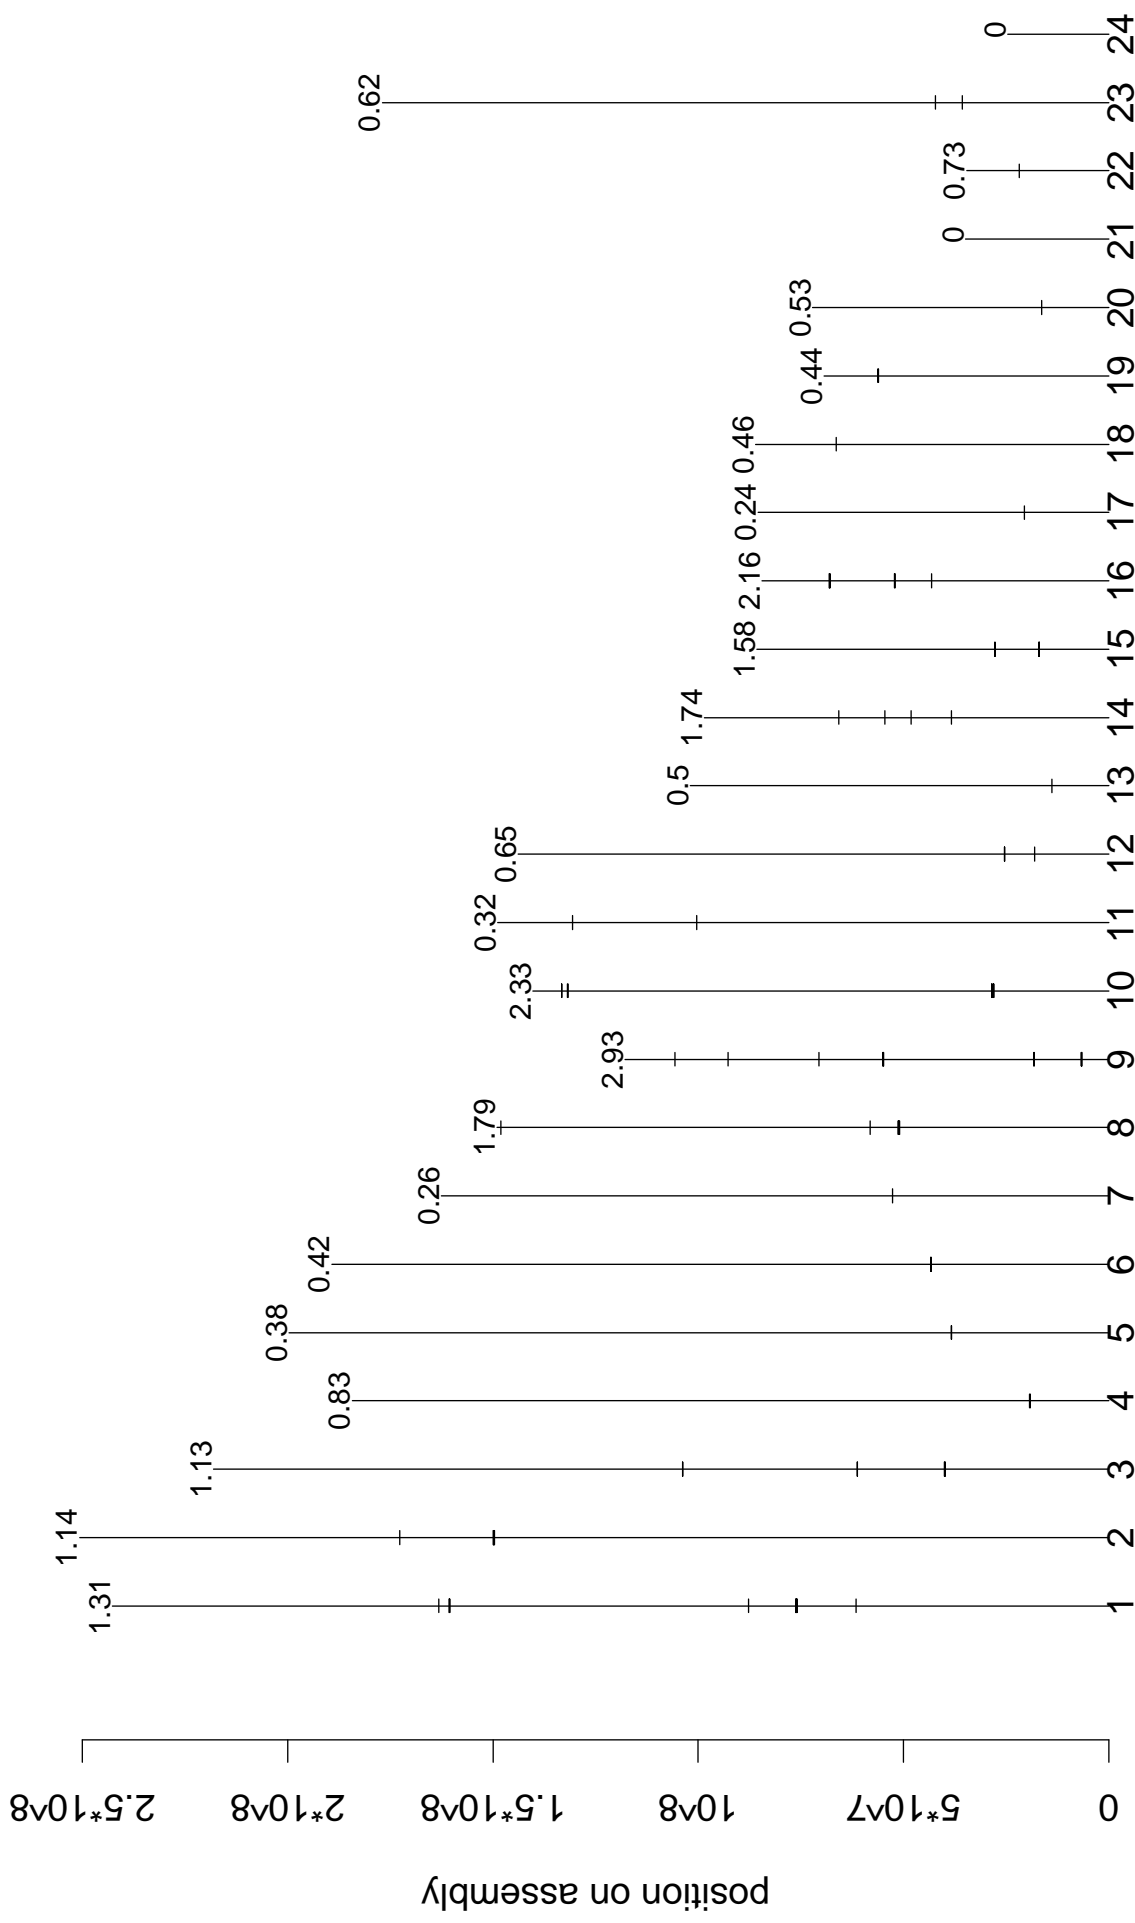

Chromosome

# Stress response

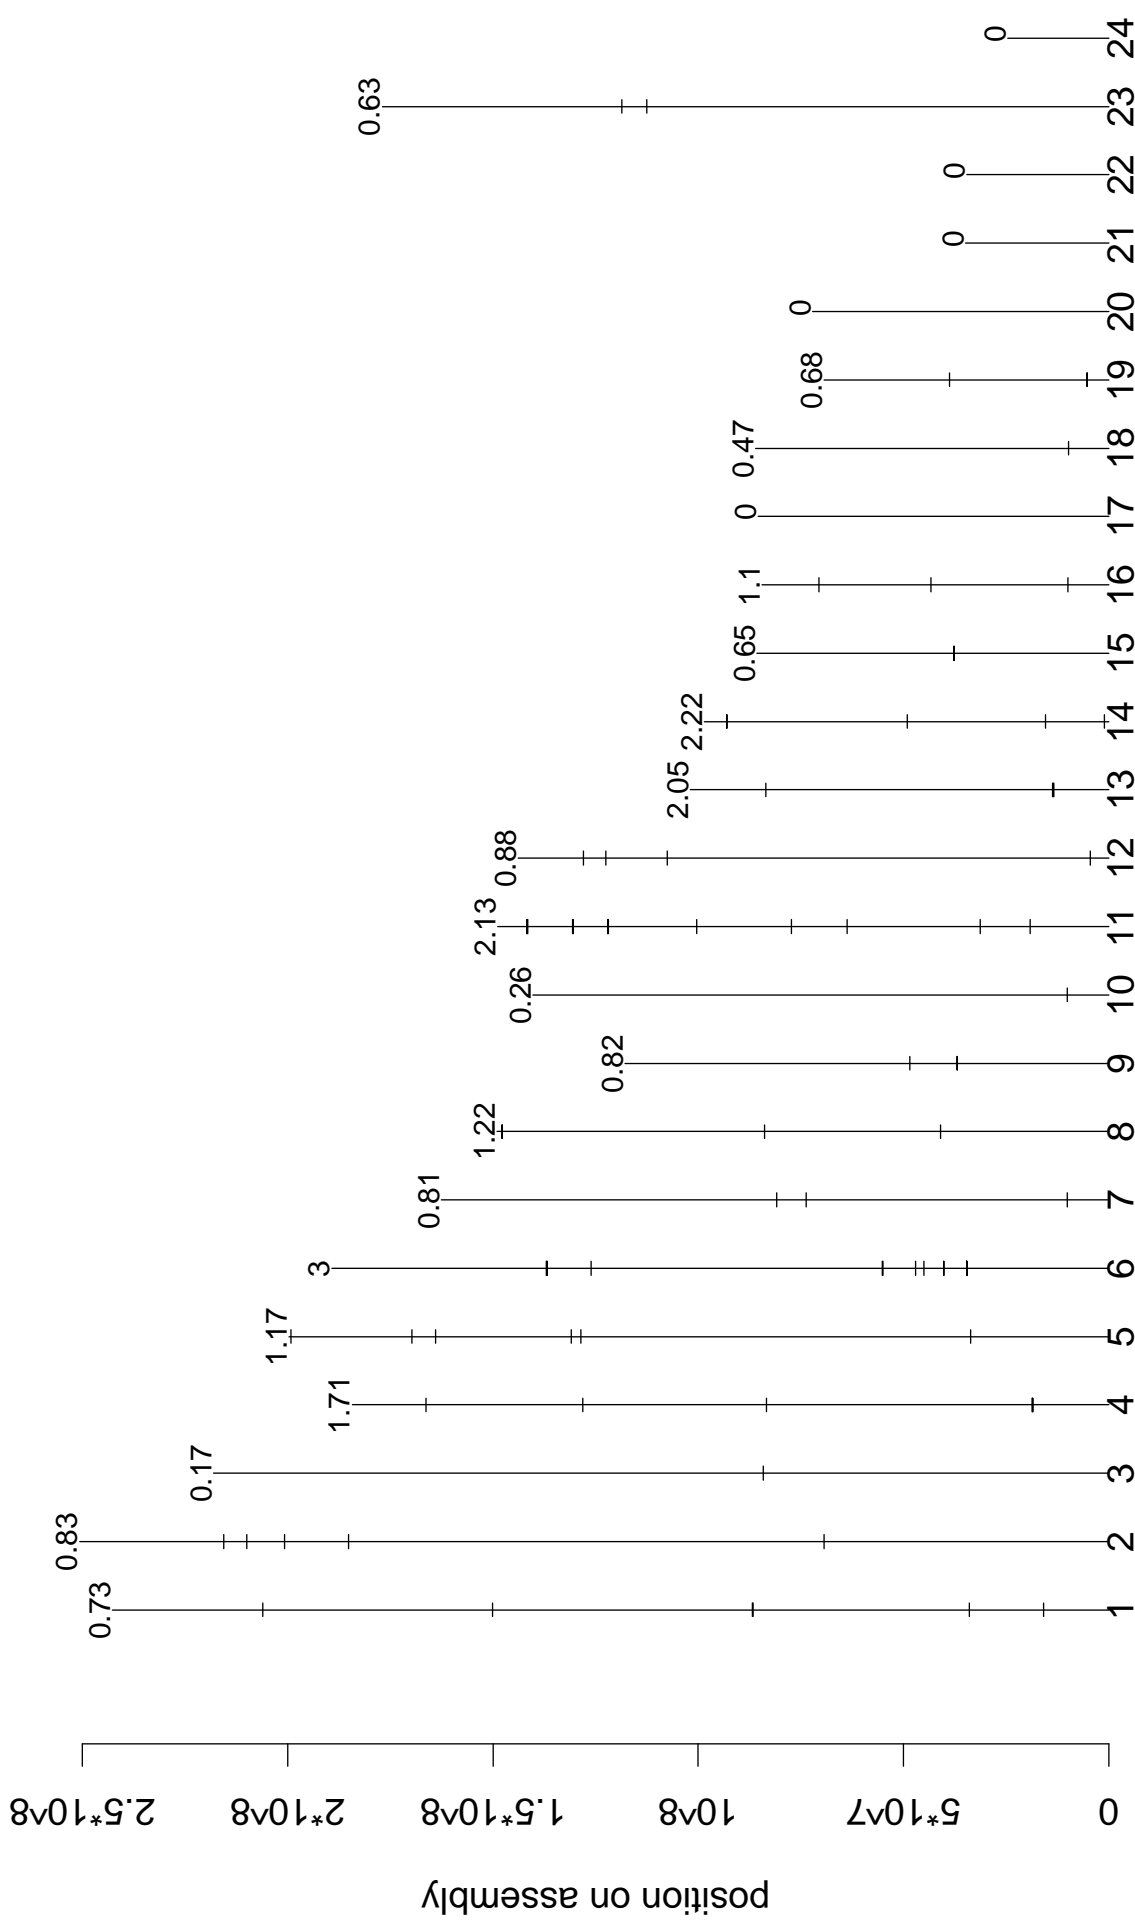

# Amino acid and derivative metabolism

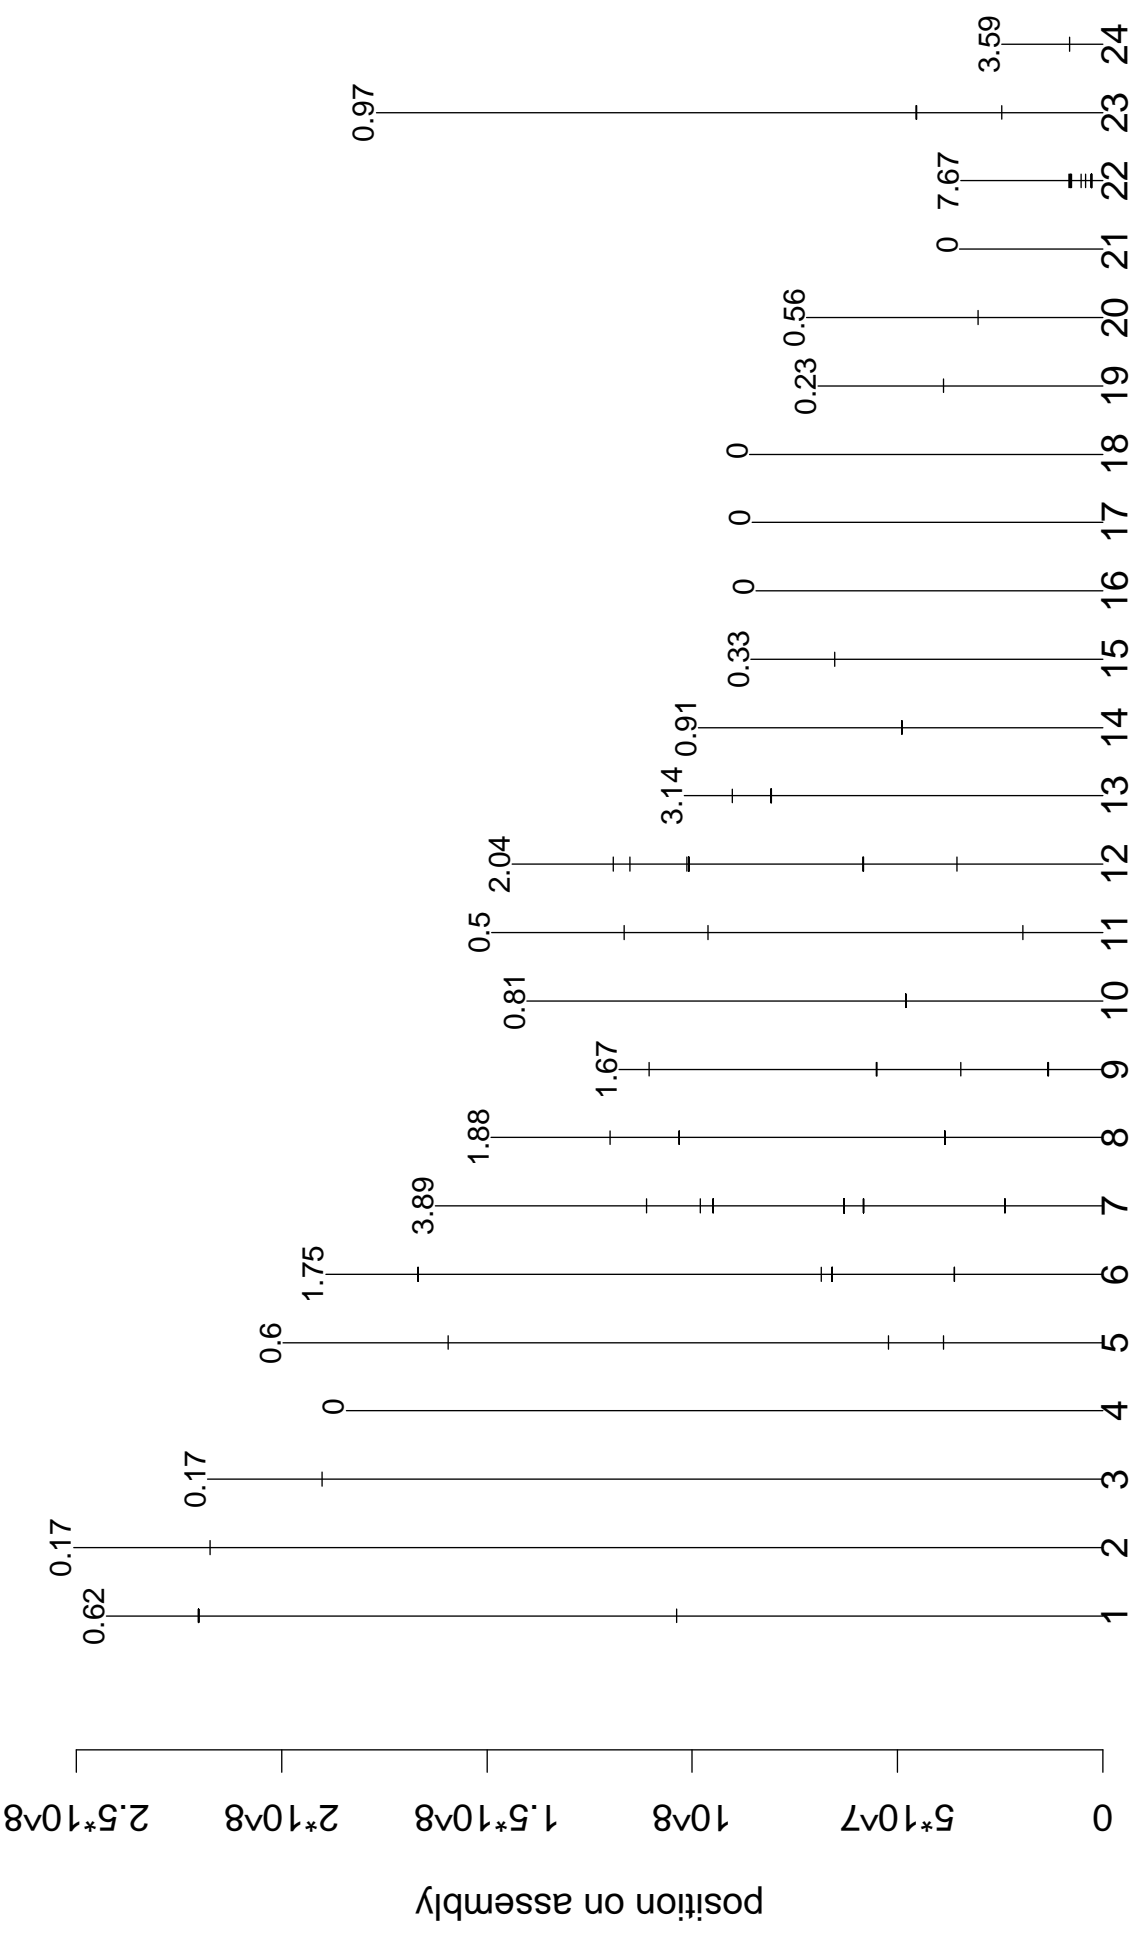

Chromosome

# Chaperone

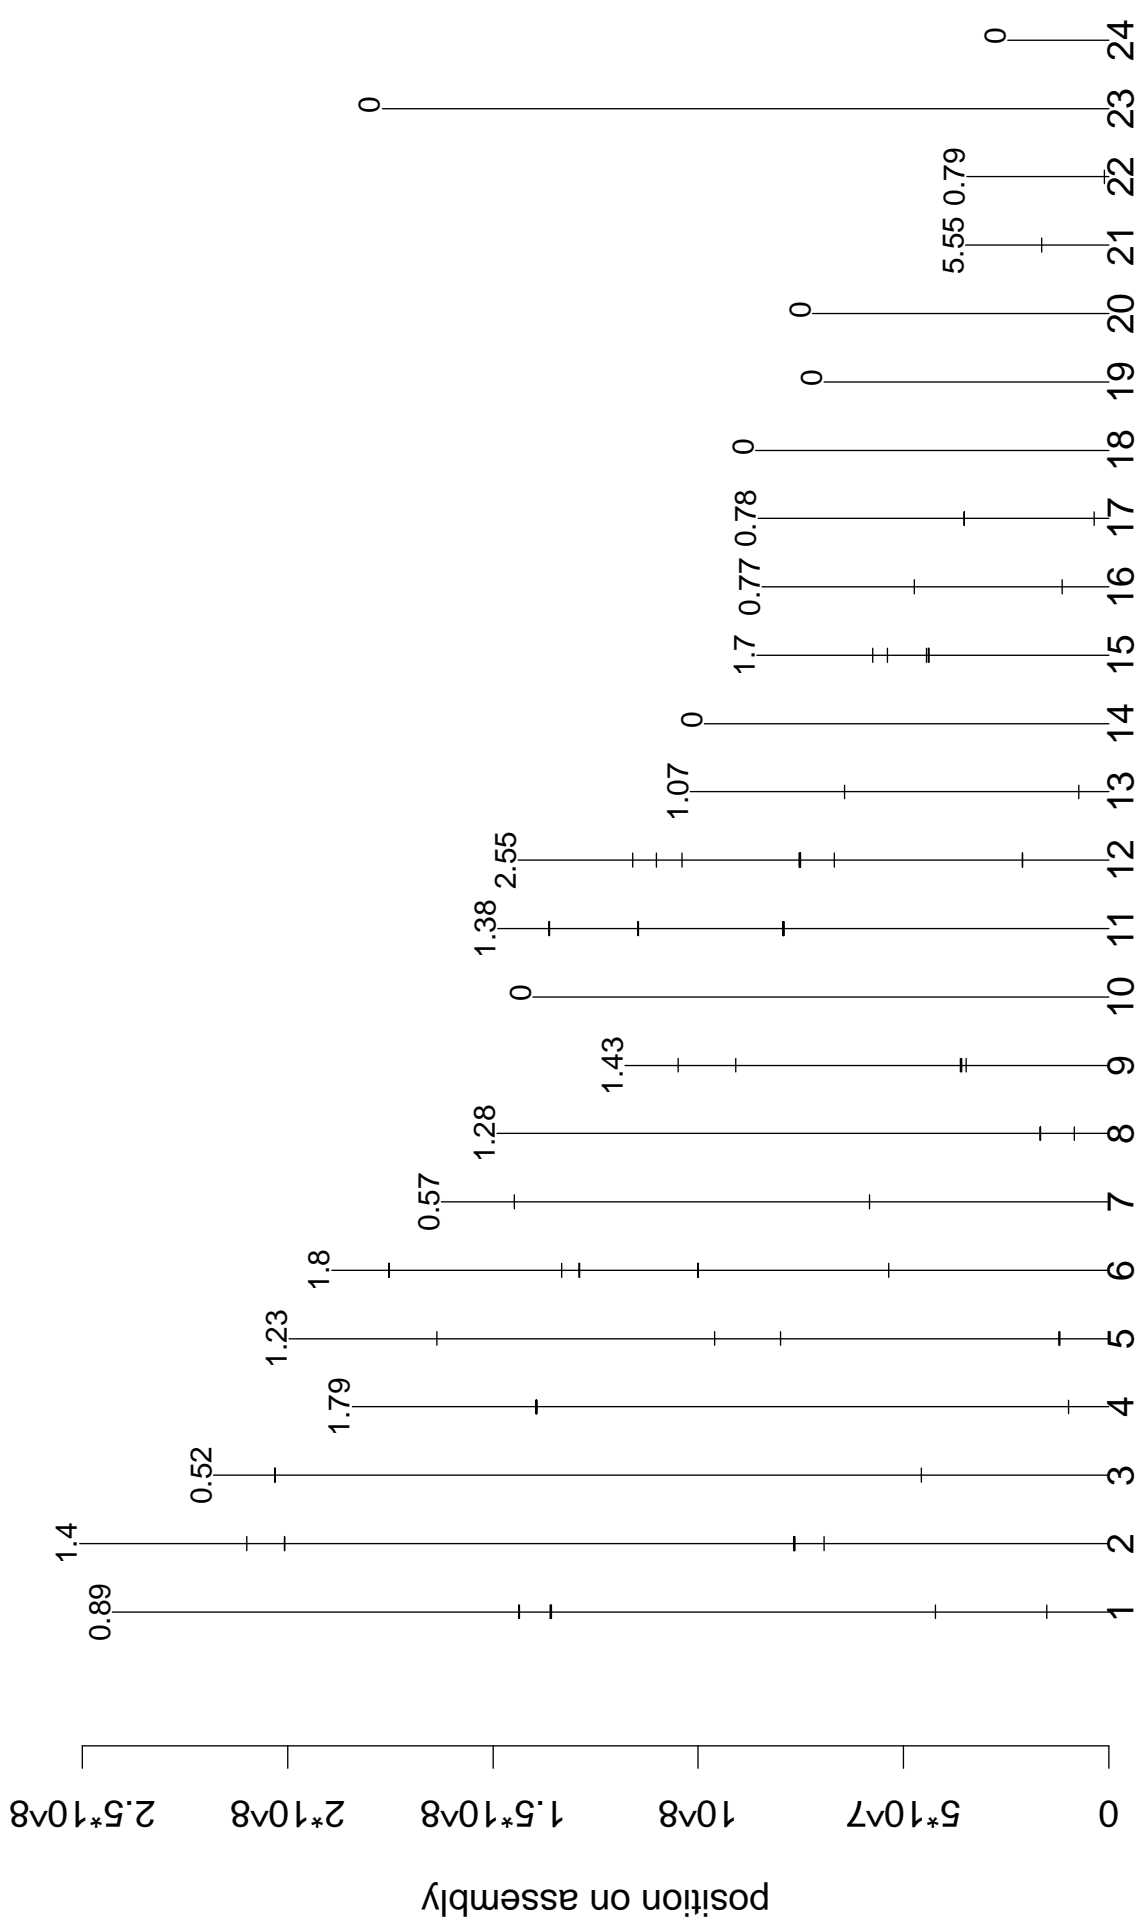

Chromosome

# Translation factor

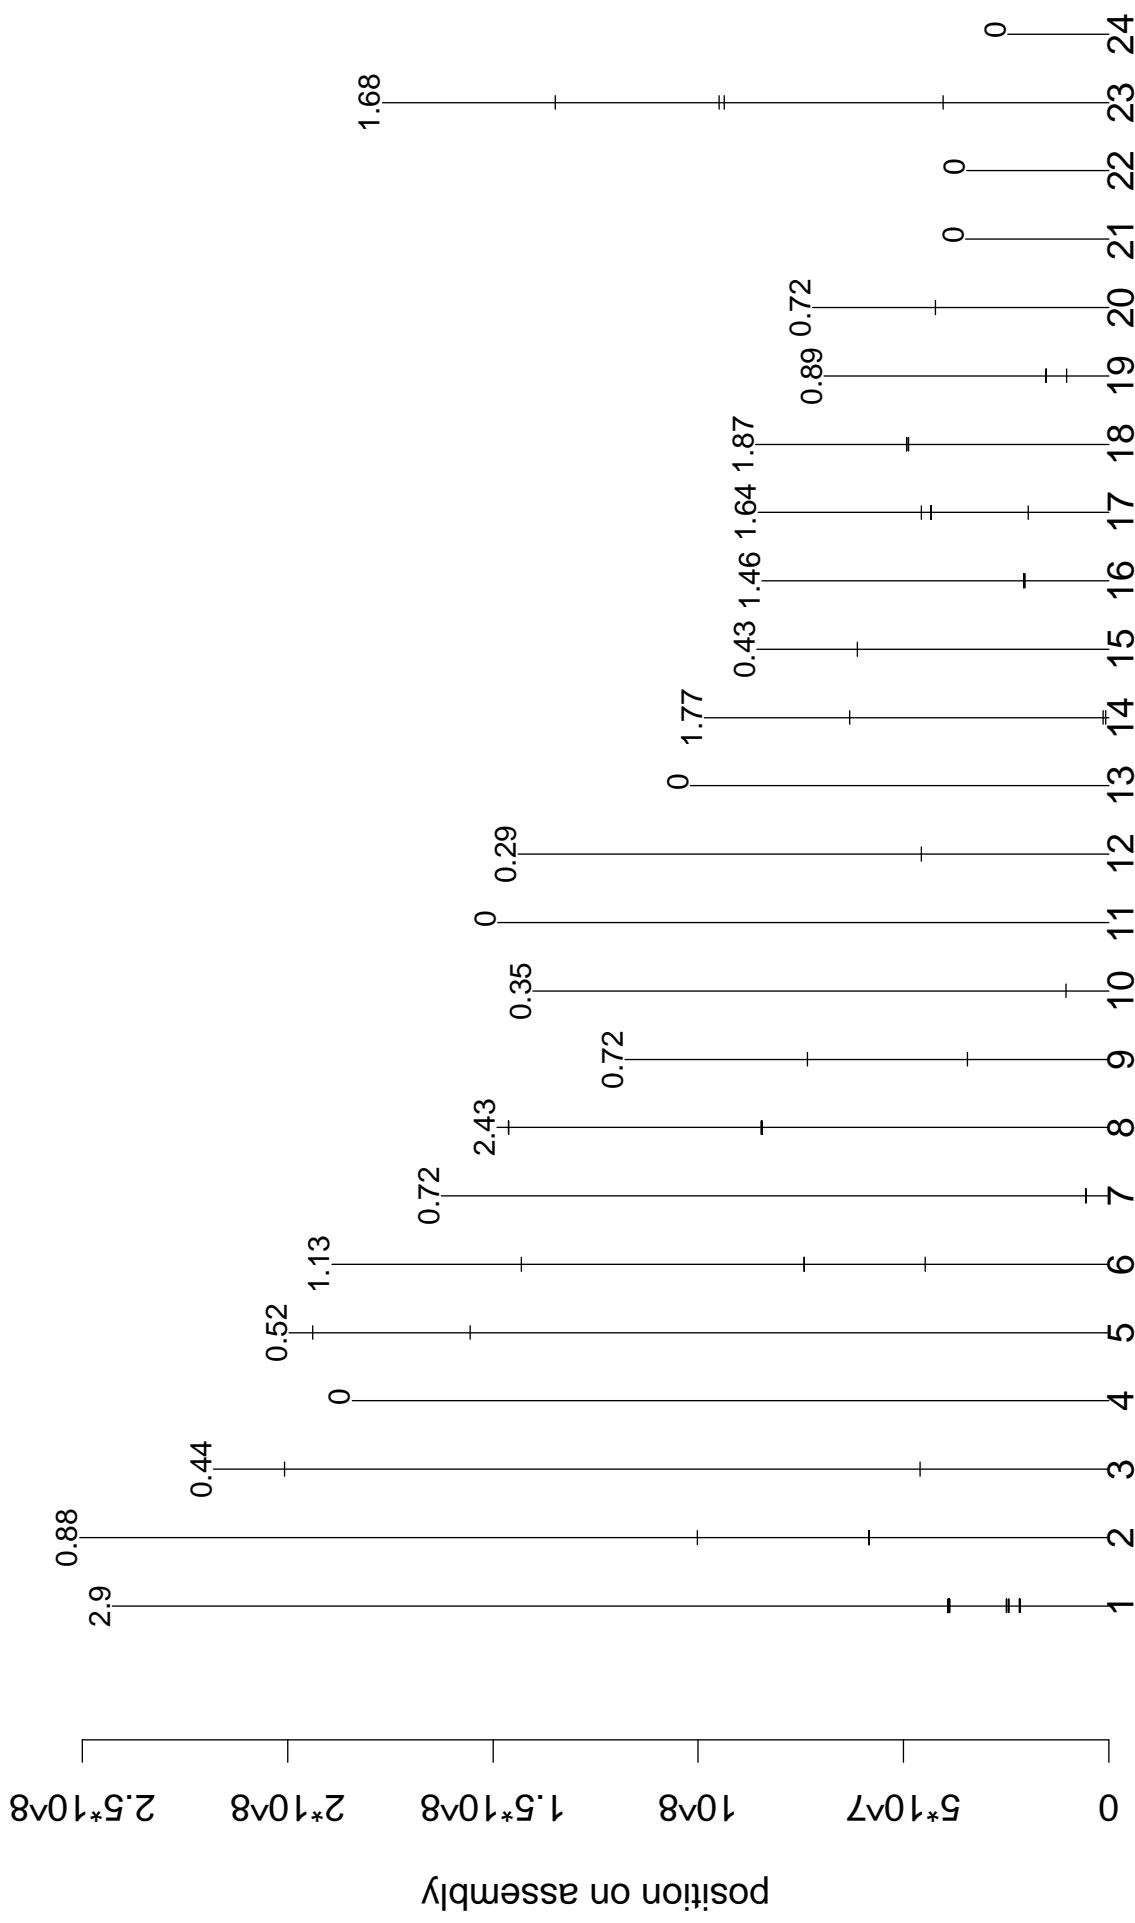

# Actin binding

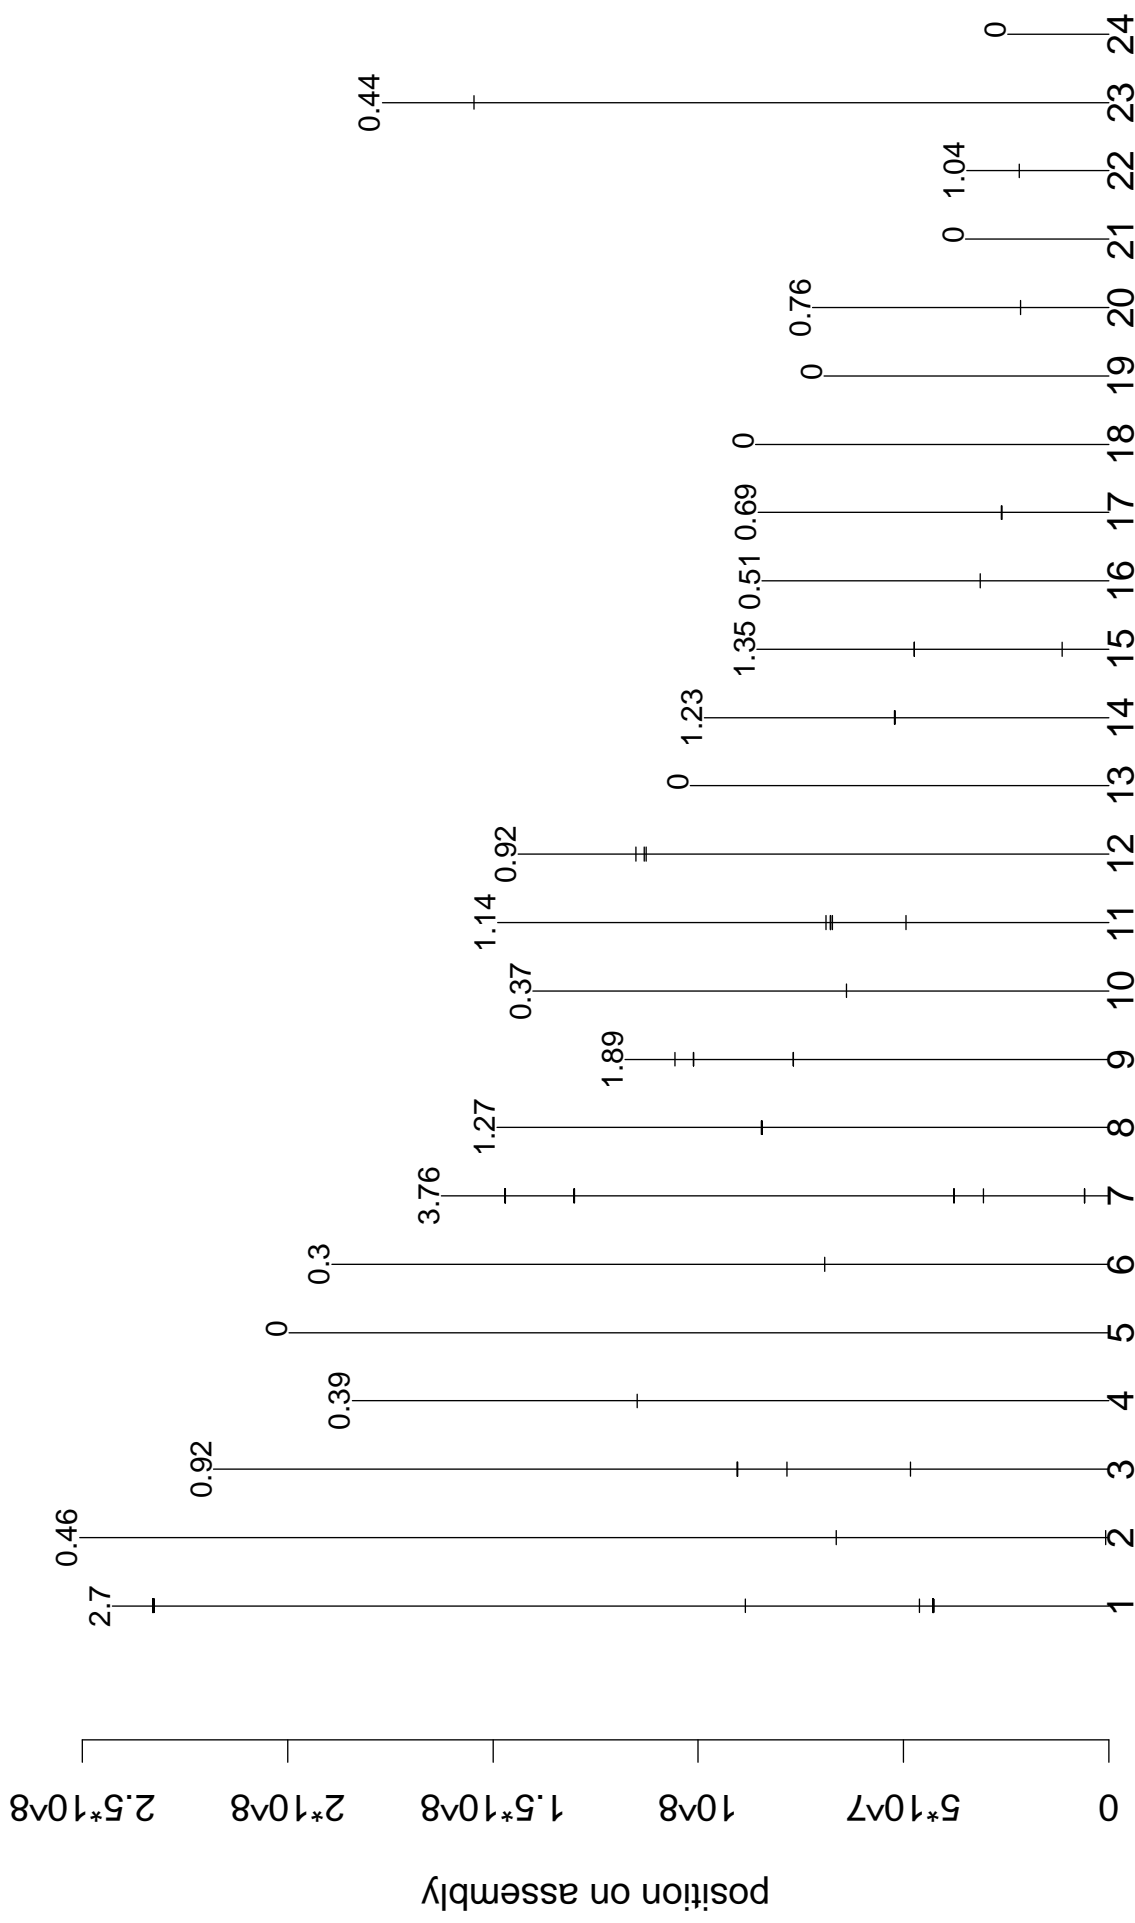

Chromosome

# Tumor suppressor

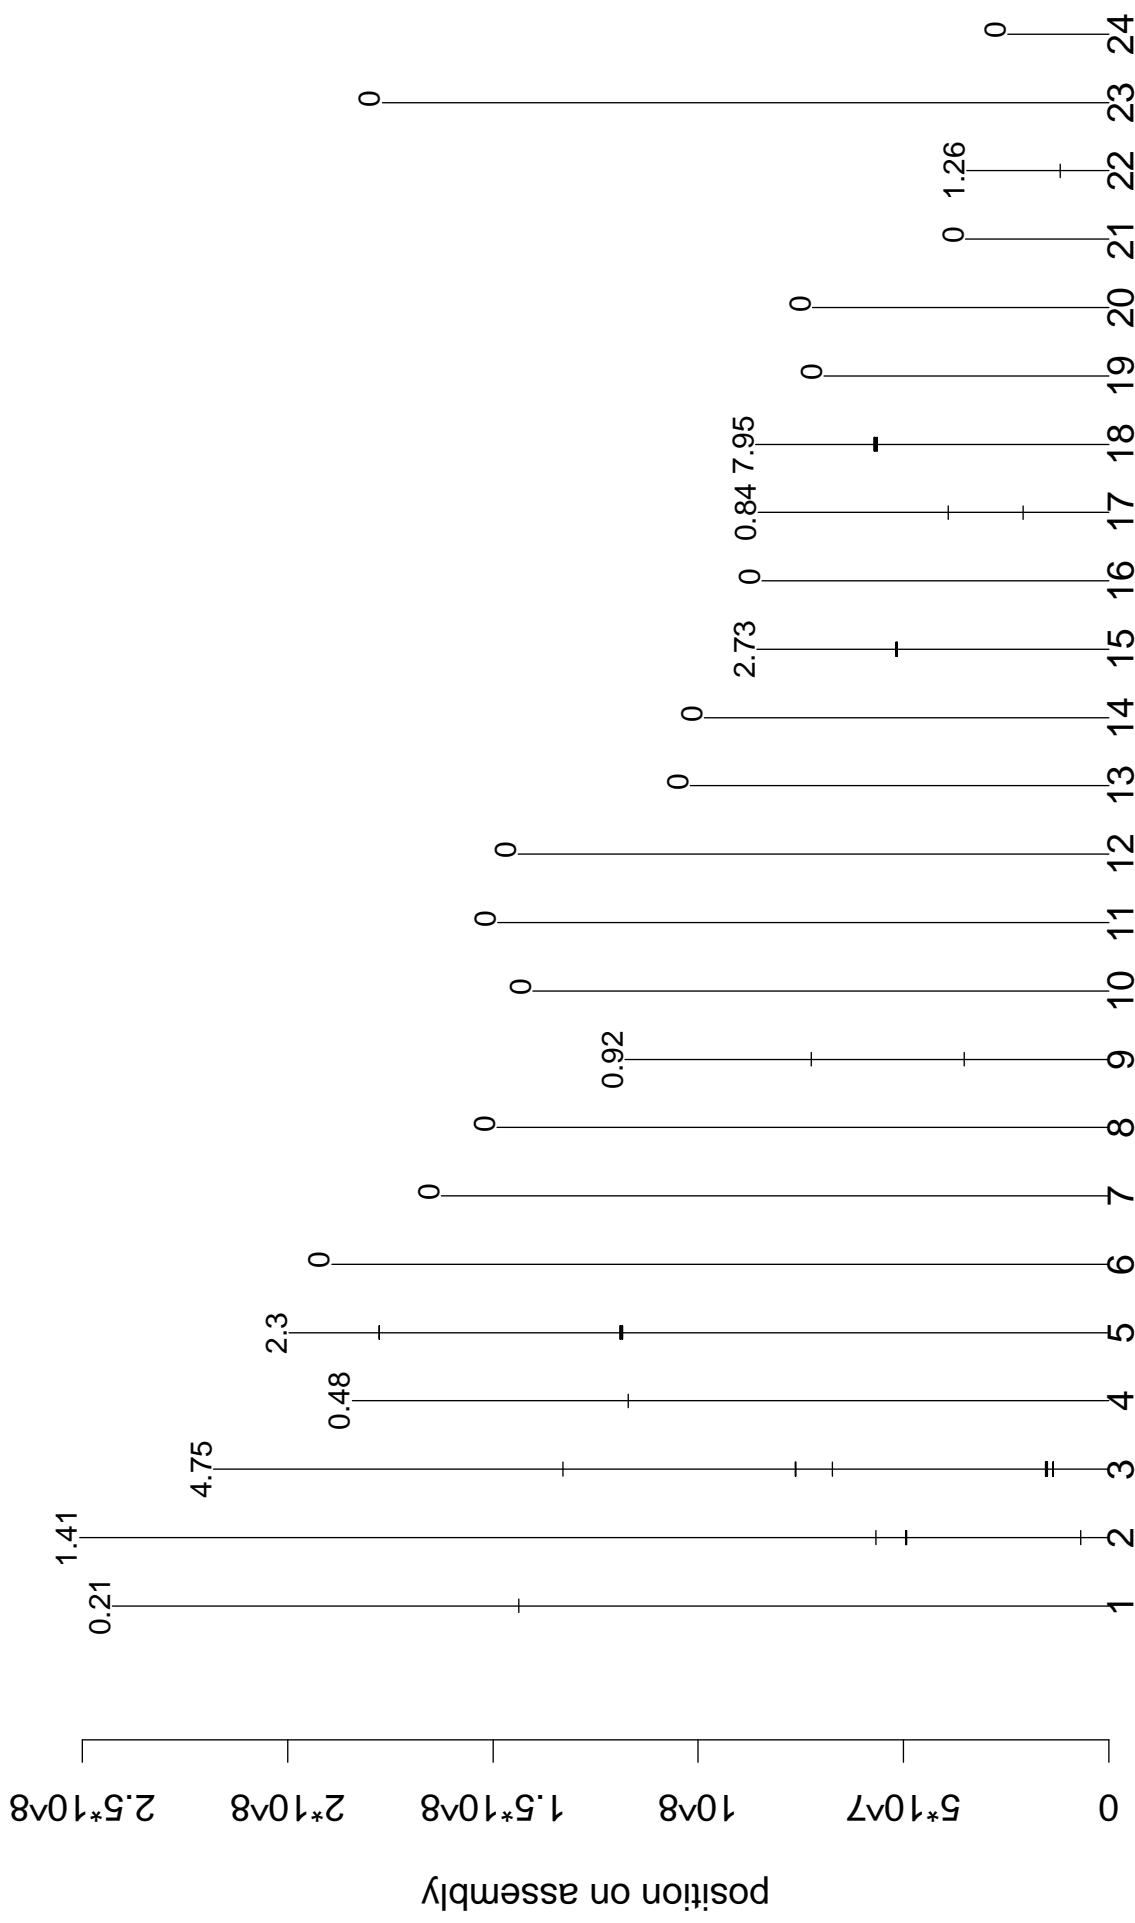

# Cytoplasm organization and biogenesis

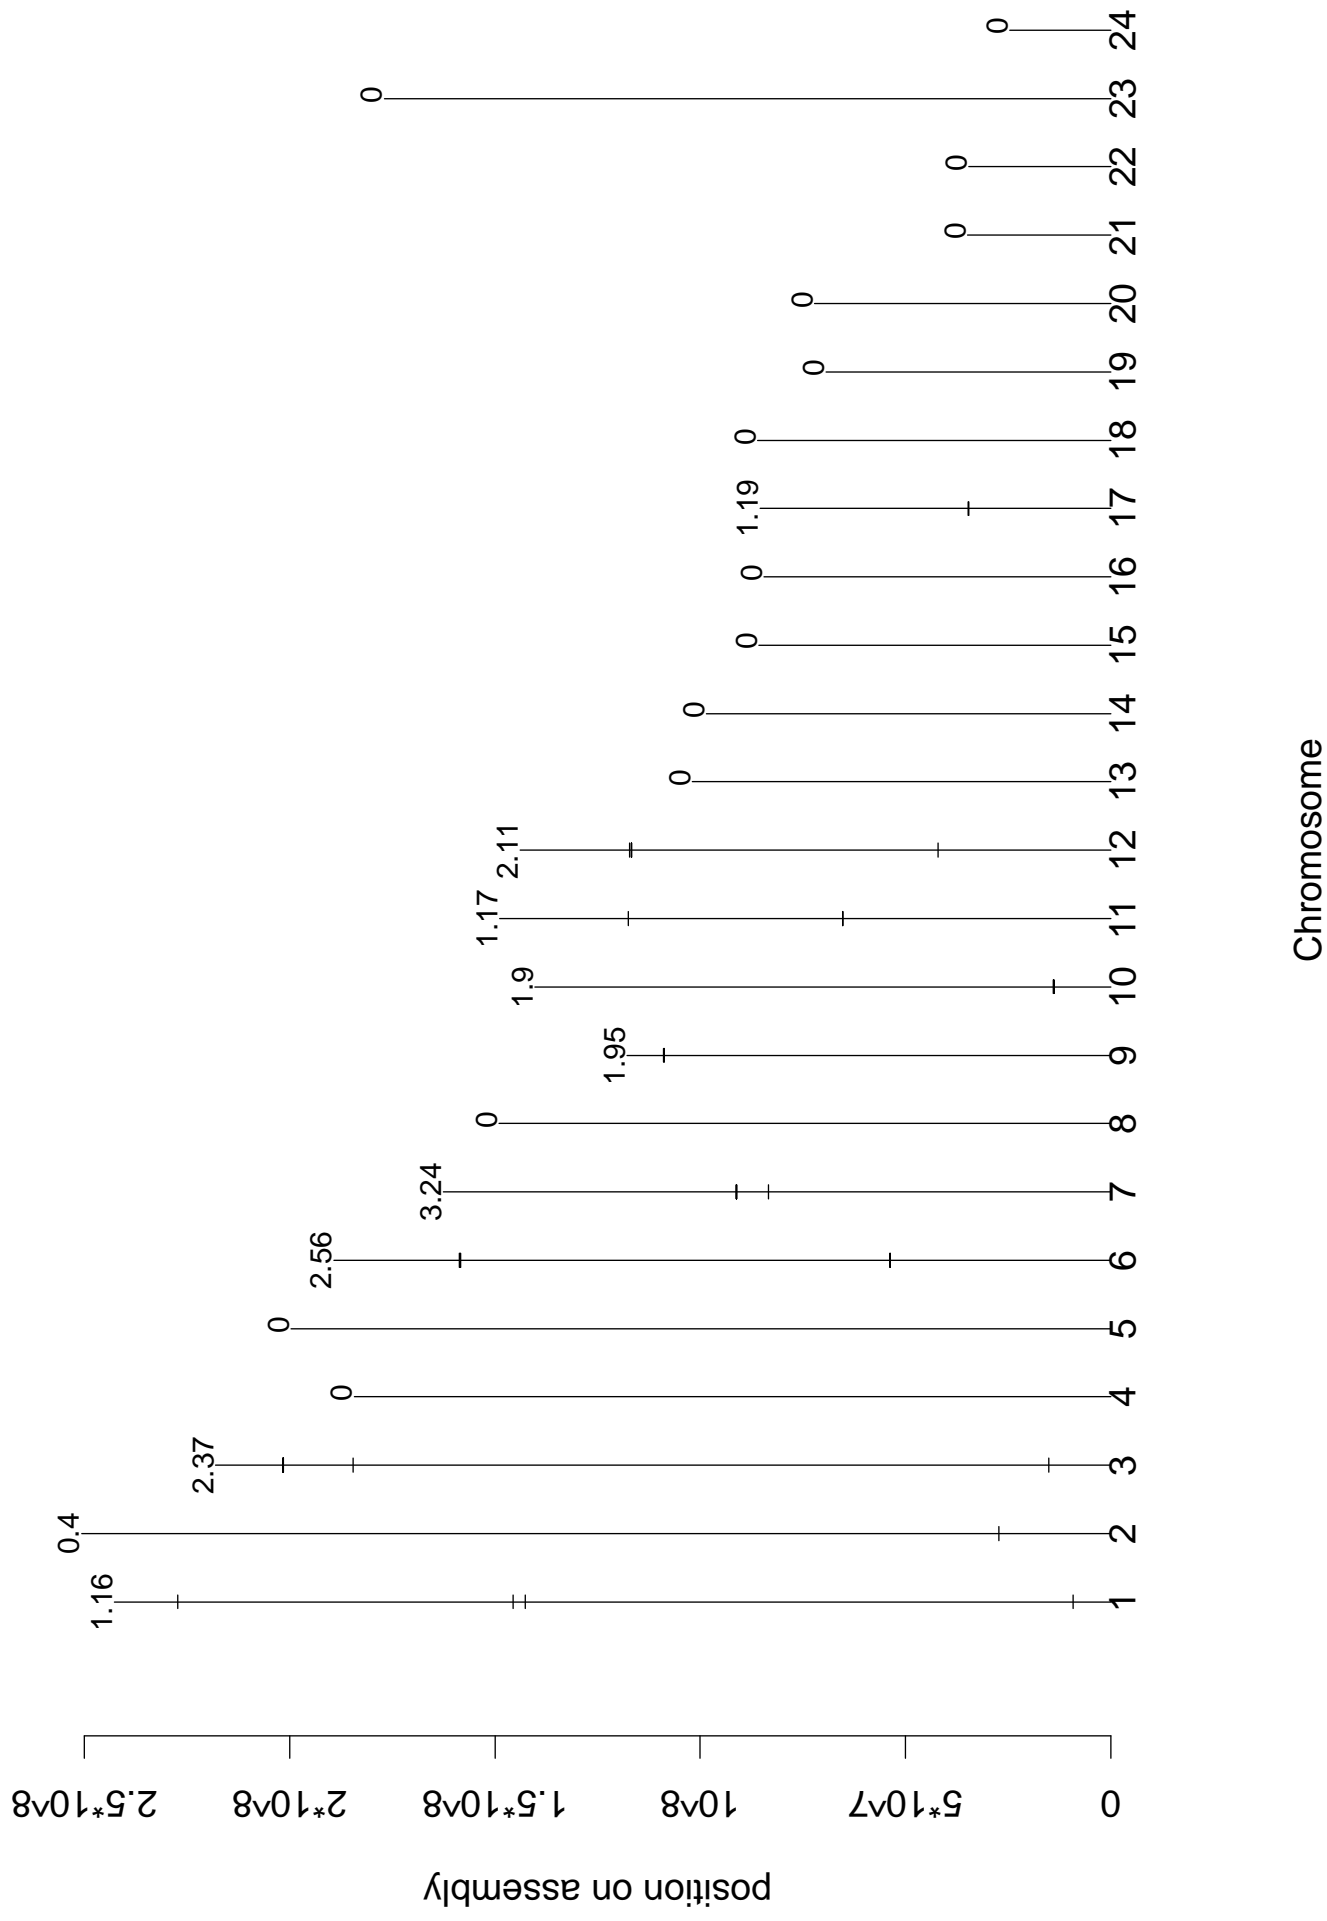



# Structural protein

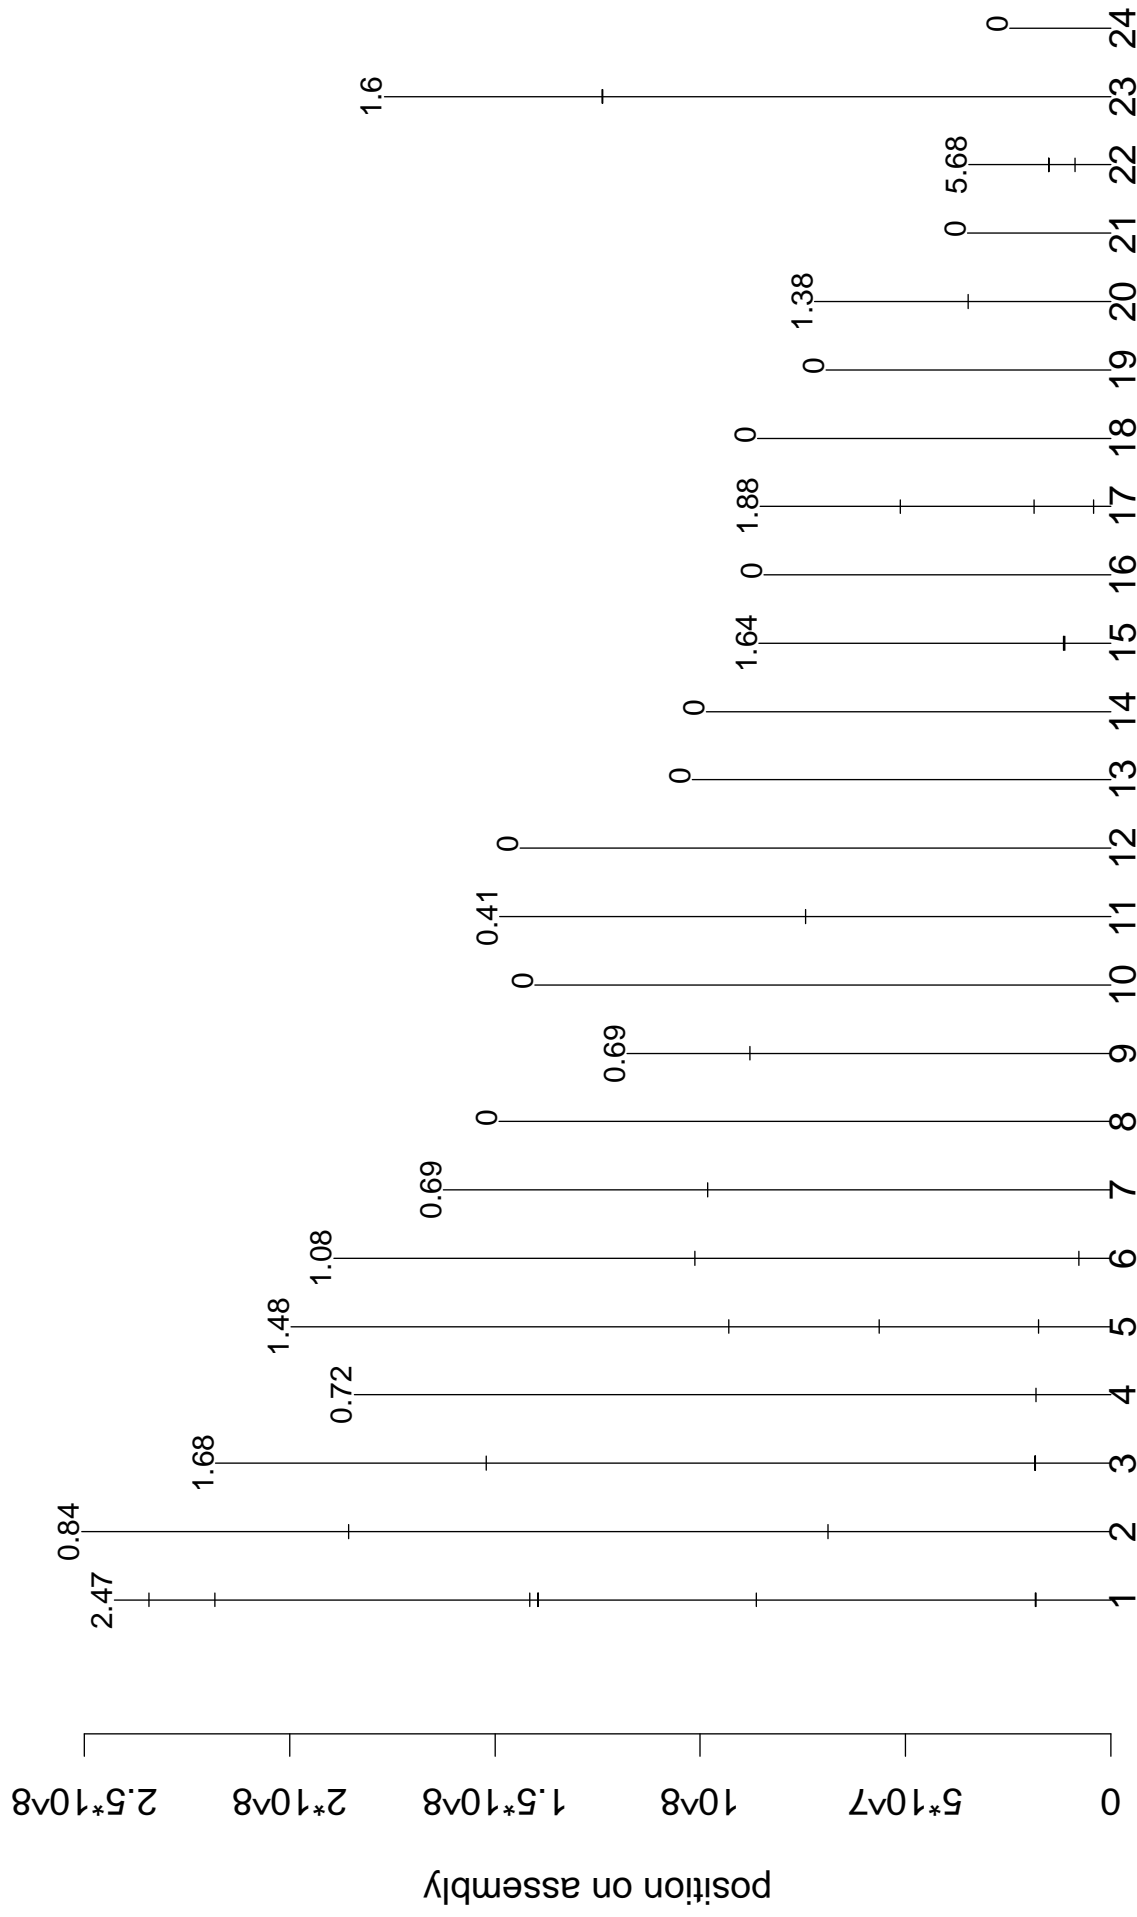

Chromosome

# Steroid metabolism

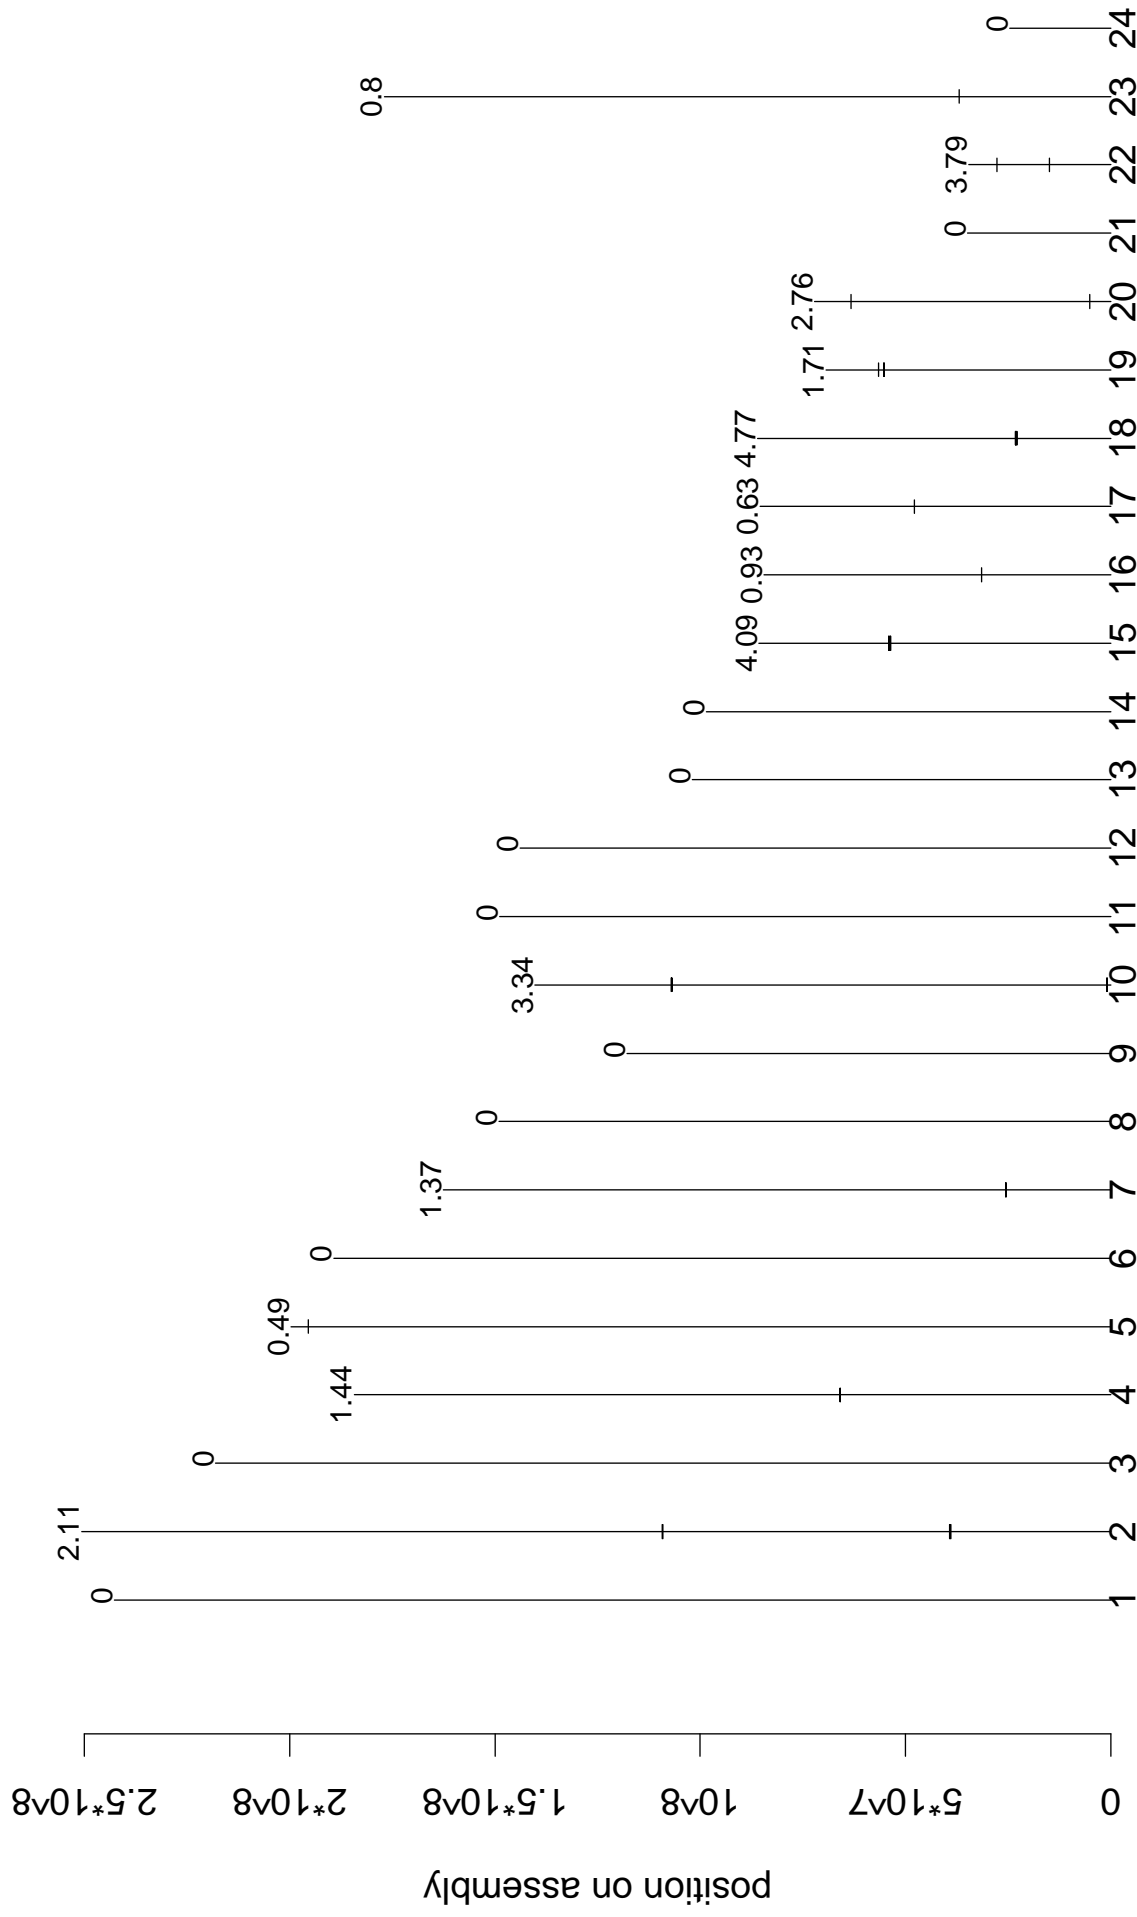

Chromosome

# Detoxification

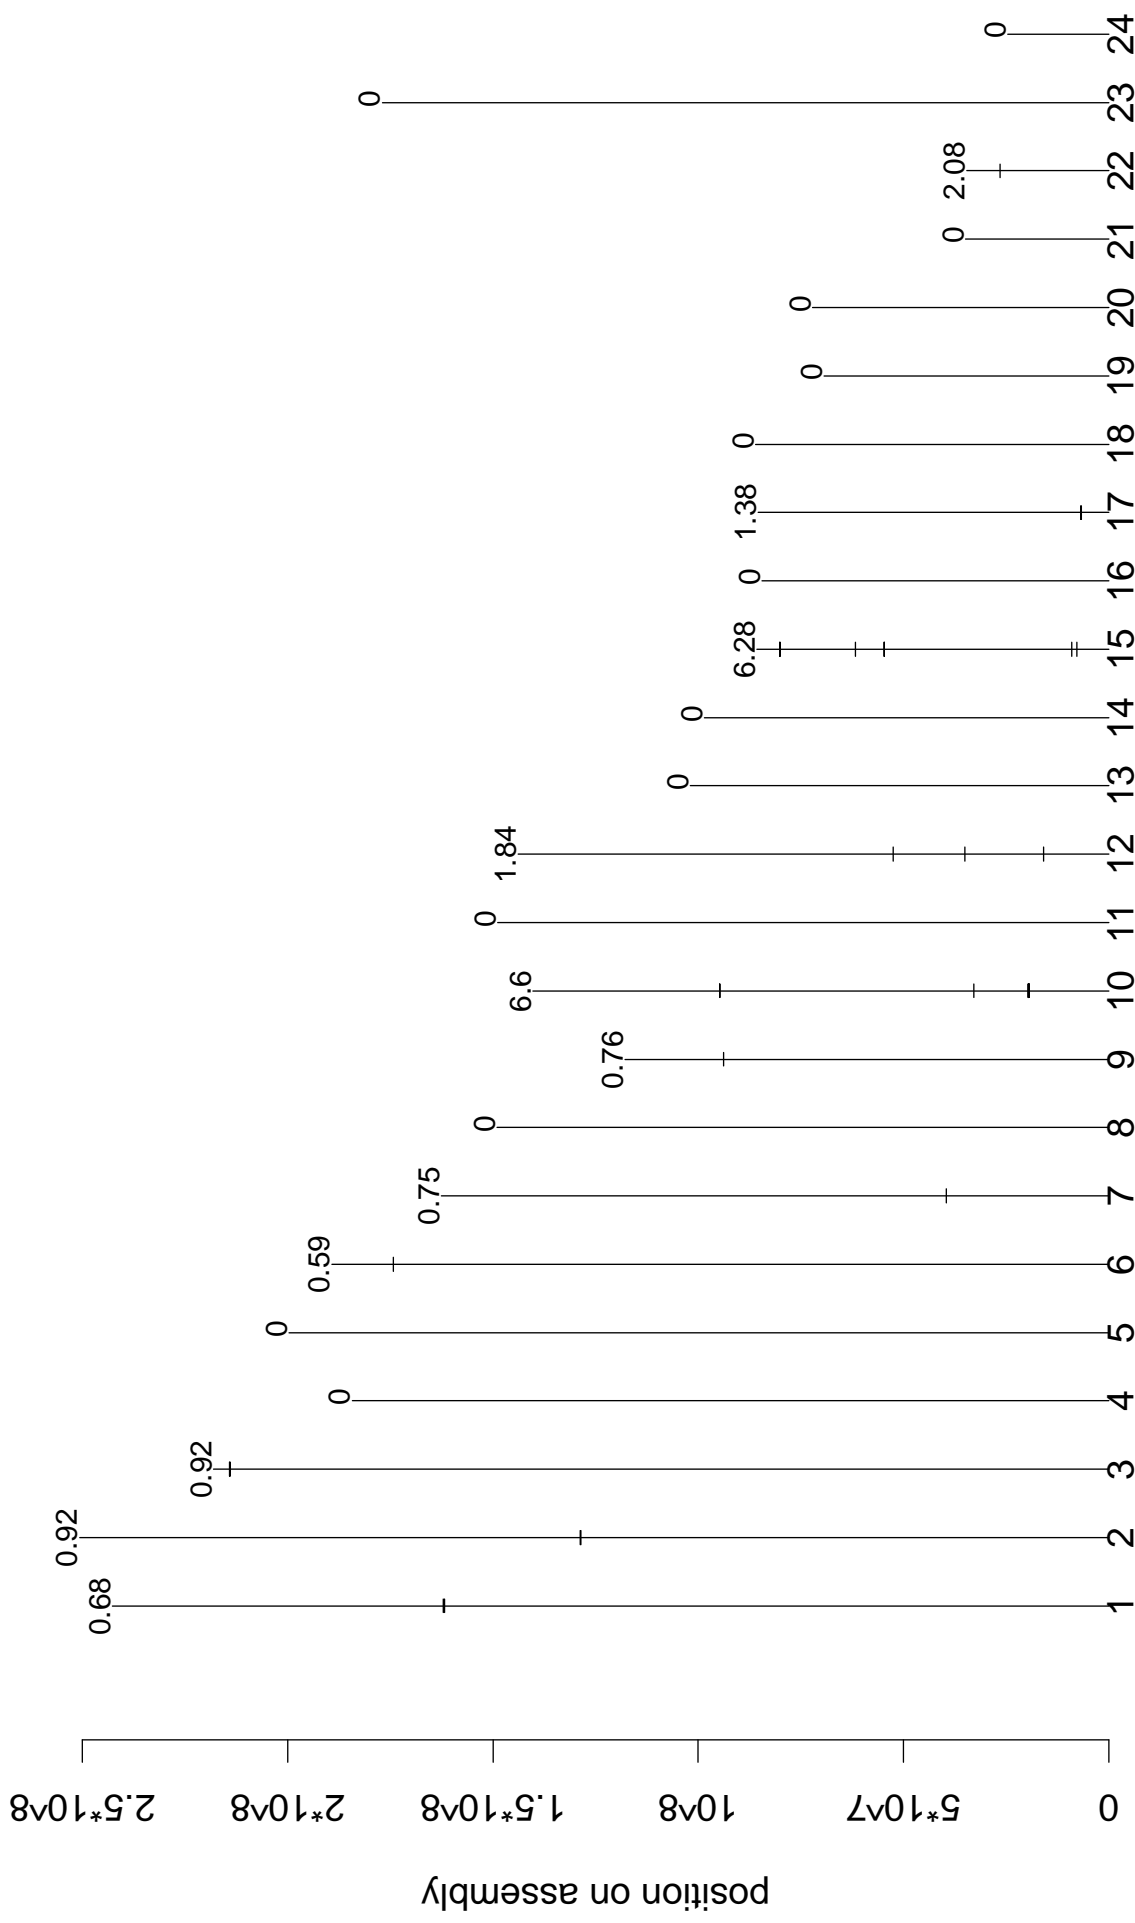

# Hormone

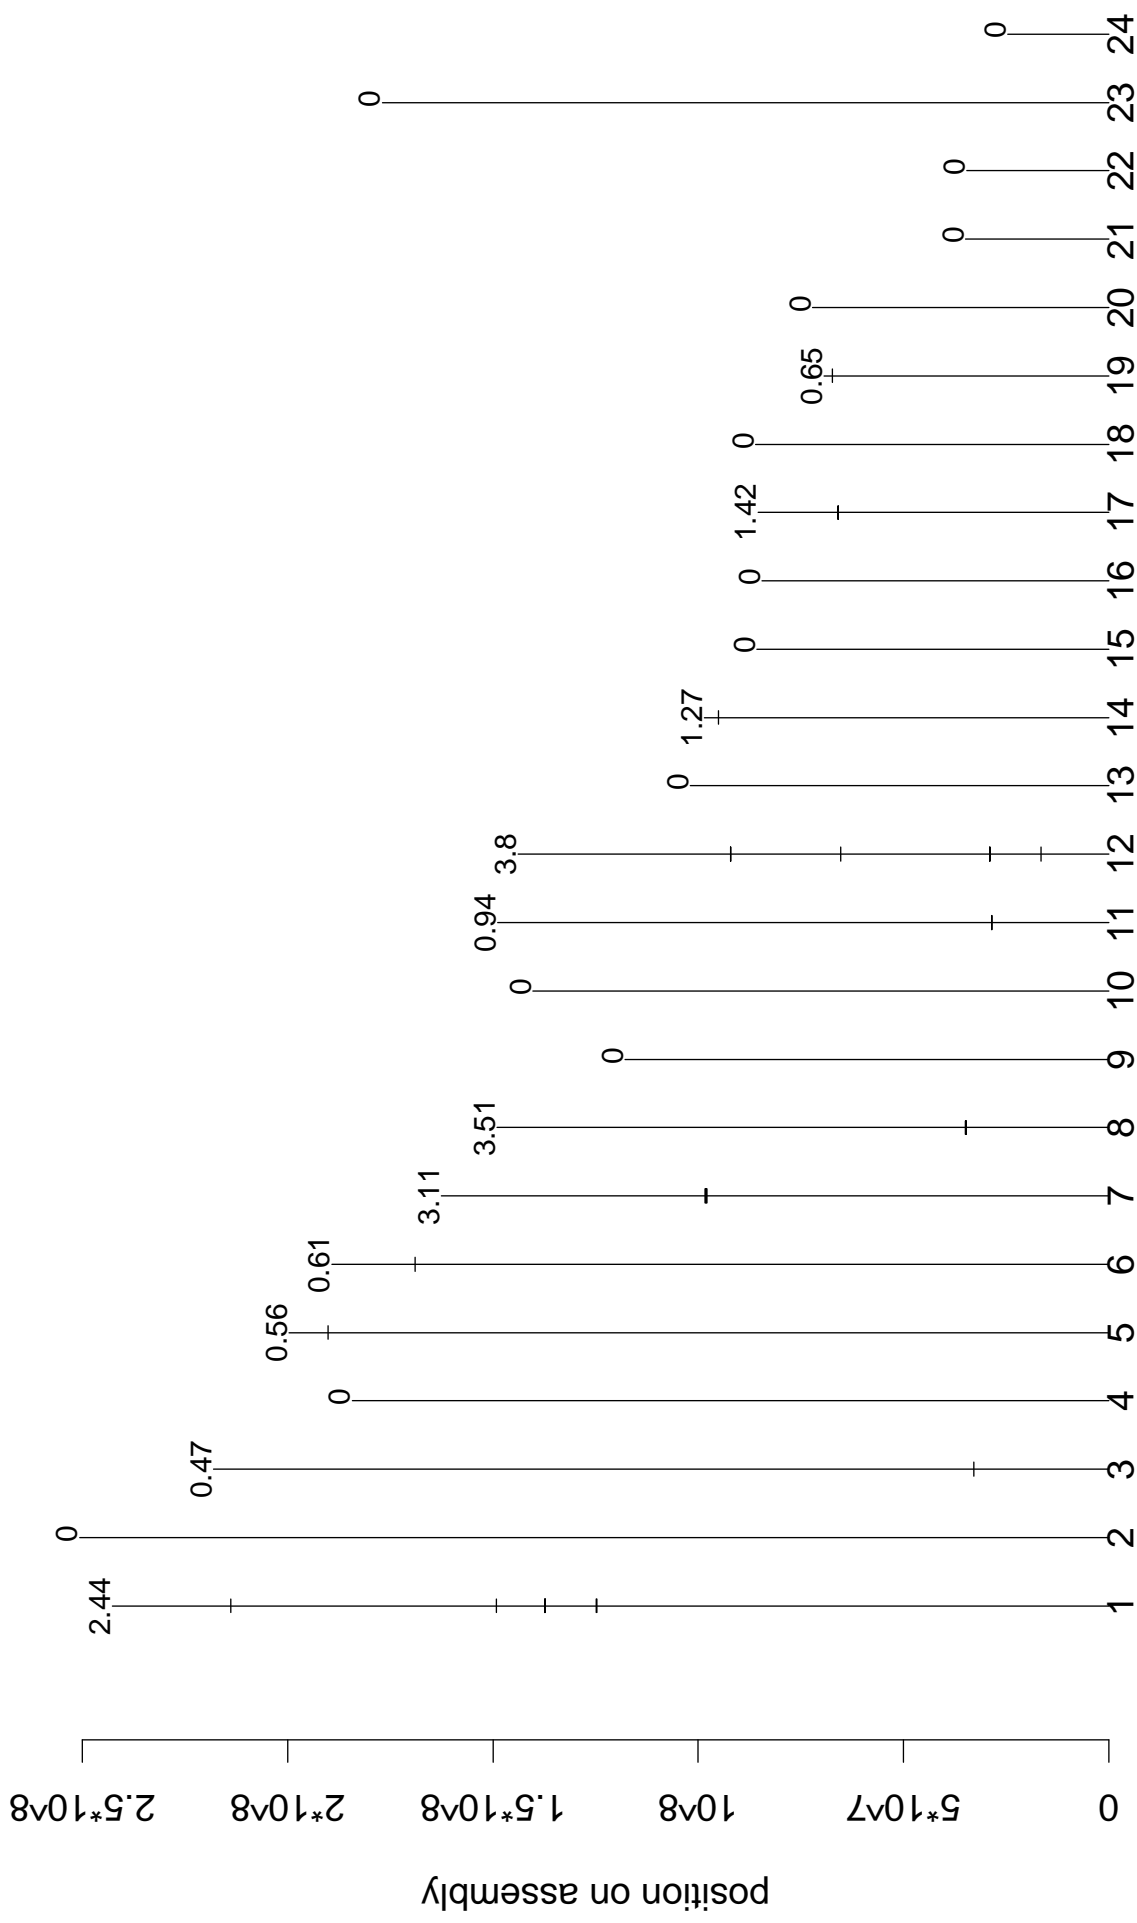

# Chromosome
